# Supplementary material for: Characterization and expression profiling of microRNAs in response to plant feeding in two host-plant strains of the lepidopteran pest Spodoptera frugiperda
Source: BMC Genomics. 2018 Nov 6;19:804. doi: 10.1186/s12864-018-5119-6 (PMC6219076; doi:10.1186/s12864-018-5119-6)
Supplement: Supplementary file 9 — Excel file S4. List of gene target predictions of known differentially expressed miRs. (XLSX 1578 kb) [file 12864_2018_5119_MOESM9_ESM.xlsx]

## Sheet: TargetScan
miR34
Row	Gene_ID	Gene_ID	miRNA_family_ID	UTR_start	UTR_end	Group_num	Site_type	miRNA in this species	Group_type
1	GSSPFG00034602001.3-RA	GSSPFG00034602001.3-RA_370938-372821	scaffold_23013_23354	1790	1796	42	1a	x	1a
2	GSSPFG00034613001-RA	GSSPFG00034613001-RA_554510-555637	scaffold_23013_23354	686	692	61	m8	x	m8
3	GSSPFG00014404001.3-RA	GSSPFG00014404001.3-RA_63815-64791	scaffold_23013_23354	101	107	70	1a	x	1a
4	GSSPFG00010630001.2	GSSPFG00010630001.2-RA_2109-3724	scaffold_23013_23354	394	400	269	1a	x	1a
5	GSSPFG00031627001	GSSPFG00031627001-RA_1898-2962	scaffold_23013_23354	385	391	361	8mer	x	8mer
6	GSSPFG00003345001	GSSPFG00003345001-RA_5028-6040	scaffold_23013_23354	72	78	377	1a	x	1a
7	GSSPFG00034291001-RA	GSSPFG00034291001-RA_11353-11650	scaffold_23013_23354	122	128	413	m8	x	m8
8	GSSPFG00030725001.2-RA	GSSPFG00030725001.2-RA_9234-10394	scaffold_23013_23354	1091	1097	442	m8	x	m8
9	GSSPFG00029509001-RA	GSSPFG00029509001-RA_139972-141044	scaffold_23013_23354	314	320	584	1a	x	1a
10	GSSPFG00033217001-RA	GSSPFG00033217001-RA_221156-222695	scaffold_23013_23354	729	735	743	m8	x	m8
11	GSSPFG00031558001-RA	GSSPFG00031558001-RA_1758-2754	scaffold_23013_23354	436	442	776	1a	x	1a
12	GSSPFG00016871001.3-RA	GSSPFG00016871001.3-RA_1942-3464	scaffold_23013_23354	465	471	994	1a	x	1a
13	GSSPFG00030887001-RA	GSSPFG00030887001-RA_2935-3356	scaffold_23013_23354	296	302	1214	1a	x	1a
14	GSSPFG00000354001-RA	GSSPFG00000354001-RA_3950-4287	scaffold_23013_23354	16	22	1321	m8	x	m8
15	GSSPFG00013754001-RA	GSSPFG00013754001-RA_44382-46117	scaffold_23013_23354	718	724	1372	1a	x	1a
16	GSSPFG00032940001-RA	GSSPFG00032940001-RA_6742-8088	scaffold_23013_23354	842	848	1468	m8	x	m8
17	GSSPFG00032358001-RA	GSSPFG00032358001-RA_6238-7285	scaffold_23013_23354	276	282	1681	1a	x	1a
18	GSSPFG00030328001-RA	GSSPFG00030328001-RA_50226-51163	scaffold_23013_23354	464	470	1917	m8	x	m8
19	GSSPFG00027913001-RA	GSSPFG00027913001-RA_5247-5419	scaffold_23013_23354	50	56	1955	1a	x	1a
20	GSSPFG00029860001-RA	GSSPFG00029860001-RA_394-509	scaffold_23013_23354	8	14	1976	8mer	x	8mer
21	GSSPFG00024173001-RA	GSSPFG00024173001-RA_7576-8316	scaffold_23013_23354	364	370	2032	1a	x	1a
22	GSSPFG00016813001-RA	GSSPFG00016813001-RA_6002-6903	scaffold_23013_23354	863	869	2079	1a	x	1a
23	GSSPFG00006231001-RA	GSSPFG00006231001-RA_487-1570	scaffold_23013_23354	70	76	2516	m8	x	m8
24	GSSPFG00006231001-RA	GSSPFG00006231001-RA_487-1570	scaffold_23013_23354	814	820	2517	m8	x	m8
25	GSSPFG00011597001-RA	GSSPFG00011597001-RA_58182-59347	scaffold_23013_23354	958	964	2542	m8	x	m8
26	GSSPFG00032380001-RA	GSSPFG00032380001-RA_6894-7183	scaffold_23013_23354	165	171	2617	1a	x	1a
27	GSSPFG00019860001-RA	GSSPFG00019860001-RA_10276-16819	scaffold_23013_23354	399	405	2631	m8	x	m8
28	GSSPFG00016725001-RA	GSSPFG00016725001-RA_3908-5321	scaffold_23013_23354	726	732	3018	1a	x	1a
29	GSSPFG00014708001-RA	GSSPFG00014708001-RA_53958-54984	scaffold_23013_23354	851	857	3042	8mer	x	8mer
30	GSSPFG00006911001-RA	GSSPFG00006911001-RA_2474-3302	scaffold_23013_23354	665	671	3060	8mer	x	8mer
31	GSSPFG00004127001-RA	GSSPFG00004127001-RA_761-1093	scaffold_23013_23354	192	198	3096	1a	x	1a
32	GSSPFG00027696001-RA	GSSPFG00027696001-RA_79409-80271	scaffold_23013_23354	545	551	3148	m8	x	m8
33	GSSPFG00029248001-RA	GSSPFG00029248001-RA_6954-7337	scaffold_23013_23354	271	277	3236	m8	x	m8
34	GSSPFG00026103001-RA	GSSPFG00026103001-RA_7061-7727	scaffold_23013_23354	585	591	3697	m8	x	m8
35	GSSPFG00024643001-RA	GSSPFG00024643001-RA_6332-7710	scaffold_23013_23354	180	186	4076	1a	x	1a
36	GSSPFG00008372001-RA	GSSPFG00008372001-RA_949-1848	scaffold_23013_23354	771	777	4135	1a	x	1a
37	GSSPFG00027830001-RA	GSSPFG00027830001-RA_54097-54737	scaffold_23013_23354	418	424	4202	m8	x	m8
38	GSSPFG00016641001.3-RA	GSSPFG00016641001.3-RA_4311-4634	scaffold_23013_23354	74	80	4407	1a	x	1a
39	GSSPFG00004171001-RA	GSSPFG00004171001-RA_62479-63556	scaffold_23013_23354	378	384	4431	8mer	x	8mer
40	GSSPFG00020899001-RA	GSSPFG00020899001-RA_84148-84217	scaffold_23013_23354	55	61	4529	m8	x	m8
41	GSSPFG00001870001-RA	GSSPFG00001870001-RA_57256-58426	scaffold_23013_23354	863	869	4598	1a	x	1a
42	GSSPFG00027553001-RA	GSSPFG00027553001-RA_5661-7130	scaffold_23013_23354	841	847	4668	1a	x	1a
43	GSSPFG00016795001-RA	GSSPFG00016795001-RA_2866-3263	scaffold_23013_23354	213	219	4911	m8	x	m8
44	GSSPFG00010215001-RA	GSSPFG00010215001-RA_4873-5827	scaffold_23013_23354	443	449	5132	1a	x	1a
45	GSSPFG00021557001-RA	GSSPFG00021557001-RA_8360-9641	scaffold_23013_23354	605	611	5364	m8	x	m8
46	GSSPFG00010240001.3-RA	GSSPFG00010240001.3-RA_4092-5629	scaffold_23013_23354	1168	1174	5444	8mer	x	8mer
47	GSSPFG00029278001.3-RA	GSSPFG00029278001.3-RA_14721-15890	scaffold_23013_23354	522	528	5707	m8	x	m8
48	GSSPFG00018004001-RA	GSSPFG00018004001-RA_1259-2764	scaffold_23013_23354	224	230	6029	m8	x	m8
49	GSSPFG00008822001-RA	GSSPFG00008822001-RA_40423-40996	scaffold_23013_23354	431	437	6050	8mer	x	8mer
50	GSSPFG00005016001-RA	GSSPFG00005016001-RA_15227-16354	scaffold_23013_23354	121	127	6080	1a	x	1a
51	GSSPFG00005016001-RA	GSSPFG00005016001-RA_15227-16354	scaffold_23013_23354	54	60	6081	8mer	x	8mer
52	GSSPFG00005016001-RA	GSSPFG00005016001-RA_15227-16354	scaffold_23013_23354	96	102	6082	8mer	x	8mer
53	GSSPFG00003915001-RA	GSSPFG00003915001-RA_4938-6243	scaffold_23013_23354	369	375	6231	1a	x	1a
54	GSSPFG00003551001-RA	GSSPFG00003551001-RA_1914-2044	scaffold_23013_23354	91	97	6297	m8	x	m8
55	GSSPFG00032373001-RA	GSSPFG00032373001-RA_3968-4957	scaffold_23013_23354	719	725	6412	1a	x	1a
56	GSSPFG00006598001-RA	GSSPFG00006598001-RA_6019-6272	scaffold_23013_23354	69	75	6435	8mer	x	8mer
57	GSSPFG00013034001.3-RA	GSSPFG00013034001.3-RA_3203-4847	scaffold_23013_23354	1449	1455	6561	8mer	x	8mer
58	GSSPFG00024501001-RA	GSSPFG00024501001-RA_64769-65155	scaffold_23013_23354	335	341	6961	1a	x	1a
59	GSSPFG00006613001-RA	GSSPFG00006613001-RA_4227-5611	scaffold_23013_23354	566	572	6986	1a	x	1a
60	GSSPFG00000160001-RA	GSSPFG00000160001-RA_4991-6075	scaffold_23013_23354	943	949	7122	1a	x	1a
61	GSSPFG00002145001-RA	GSSPFG00002145001-RA_30324-31794	scaffold_23013_23354	189	195	7185	8mer	x	8mer
62	GSSPFG00002145001-RA	GSSPFG00002145001-RA_30324-31794	scaffold_23013_23354	75	81	7186	m8	x	m8
63	GSSPFG00013844001-RA	GSSPFG00013844001-RA_28531-28643	scaffold_23013_23354	41	47	7275	8mer	x	8mer
64	GSSPFG00013845001-RA	GSSPFG00013845001-RA_39777-40246	scaffold_23013_23354	34	40	7280	8mer	x	8mer
65	GSSPFG00010918001-RA	GSSPFG00010918001-RA_211347-212810	scaffold_23013_23354	1297	1303	7613	1a	x	1a
66	GSSPFG00006636001-RA	GSSPFG00006636001-RA_17891-18895	scaffold_23013_23354	350	356	7793	1a	x	1a
67	GSSPFG00002981001-RA	GSSPFG00002981001-RA_3739-5069	scaffold_23013_23354	982	988	7975	8mer	x	8mer
68	GSSPFG00000999001.3-RA	GSSPFG00000999001.3-RA_48794-50373	scaffold_23013_23354	151	157	8131	1a	x	1a
69	GSSPFG00021745001-RA	GSSPFG00021745001-RA_3118-4169	scaffold_23013_23354	626	632	8286	m8	x	m8
70	GSSPFG00022240001-RA	GSSPFG00022240001-RA_2438-3068	scaffold_23013_23354	249	255	8780	1a	x	1a
71	GSSPFG00023770001-RA	GSSPFG00023770001-RA_3420-4543	scaffold_23013_23354	13	19	8804	m8	x	m8
72	GSSPFG00023932001-RA	GSSPFG00023932001-RA_3922-5003	scaffold_23013_23354	1036	1042	9193	m8	x	m8
73	GSSPFG00020188001-RA	GSSPFG00020188001-RA_85748-87160	scaffold_23013_23354	1226	1232	9566	1a	x	1a
74	GSSPFG00033485001-RA	GSSPFG00033485001-RA_2340-2594	scaffold_23013_23354	192	198	9617	1a	x	1a
75	GSSPFG00022009001-RA	GSSPFG00022009001-RA_890-1783	scaffold_23013_23354	626	632	9948	1a	x	1a
76	GSSPFG00032778001-RA	GSSPFG00032778001-RA_3136-3772	scaffold_23013_23354	382	388	10025	m8	x	m8
77	GSSPFG00032278001-RA	GSSPFG00032278001-RA_2753-4133	scaffold_23013_23354	311	317	10206	m8	x	m8
78	GSSPFG00003786001-RA	GSSPFG00003786001-RA_12015-13146	scaffold_23013_23354	367	373	10227	8mer	x	8mer
79	GSSPFG00028951001-RA	GSSPFG00028951001-RA_189360-190067	scaffold_23013_23354	72	78	10324	8mer	x	8mer
80	GSSPFG00001876001-RA	GSSPFG00001876001-RA_35570-35699	scaffold_23013_23354	107	113	10339	m8	x	m8
81	GSSPFG00017622001-RA	GSSPFG00017622001-RA_3052-3904	scaffold_23013_23354	812	818	10378	1a	x	1a
82	GSSPFG00024353001-RA	GSSPFG00024353001-RA_4008-4486	scaffold_23013_23354	28	34	10530	m8	x	m8
83	GSSPFG00014077001-RA	GSSPFG00014077001-RA_2181-3037	scaffold_23013_23354	27	33	11024	8mer	x	8mer
84	GSSPFG00021718001-RA	GSSPFG00021718001-RA_3276-3742	scaffold_23013_23354	145	151	11056	1a	x	1a
85	GSSPFG00030100001-RA	GSSPFG00030100001-RA_1411-2166	scaffold_23013_23354	360	366	11252	1a	x	1a
86	GSSPFG00011553001-RA	GSSPFG00011553001-RA_28934-29166	scaffold_23013_23354	42	48	11398	1a	x	1a
87	GSSPFG00034384001-RA	GSSPFG00034384001-RA_5909-7017	scaffold_23013_23354	852	858	11468	m8	x	m8
88	GSSPFG00010027001-RA	GSSPFG00010027001-RA_2955-4213	scaffold_23013_23354	810	816	11538	m8	x	m8
89	GSSPFG00007037001-RA	GSSPFG00007037001-RA_683-979	scaffold_23013_23354	258	264	11708	8mer	x	8mer
90	GSSPFG00008533001-RA	GSSPFG00008533001-RA_171866-173271	scaffold_23013_23354	1217	1223	11852	m8	x	m8
91	GSSPFG00008533001-RA	GSSPFG00008533001-RA_171866-173271	scaffold_23013_23354	1227	1233	11853	m8	x	m8
92	GSSPFG00020940001.3-RA	GSSPFG00020940001.3-RA_143278-144311	scaffold_23013_23354	986	992	12141	1a	x	1a
93	GSSPFG00028641001-RA	GSSPFG00028641001-RA_169552-170642	scaffold_23013_23354	242	248	12281	1a	x	1a
94	GSSPFG00000636001-RA	GSSPFG00000636001-RA_3589-3755	scaffold_23013_23354	124	130	12292	1a	x	1a
95	GSSPFG00017372001-RA	GSSPFG00017372001-RA_45472-46058	scaffold_23013_23354	31	37	12331	1a	x	1a
96	GSSPFG00014246001-RA	GSSPFG00014246001-RA_2322-3437	scaffold_23013_23354	976	982	12361	1a	x	1a
97	GSSPFG00033837001-RA	GSSPFG00033837001-RA_3502-4027	scaffold_23013_23354	422	428	12421	1a	x	1a
98	GSSPFG00017602001-RA	GSSPFG00017602001-RA_34904-35976	scaffold_23013_23354	176	182	12657	m8	x	m8
99	GSSPFG00006567001-RA	GSSPFG00006567001-RA_13007-14406	scaffold_23013_23354	1135	1141	12777	1a	x	1a
100	GSSPFG00000626001-RA	GSSPFG00000626001-RA_158292-158849	scaffold_23013_23354	429	435	12853	8mer	x	8mer
101	GSSPFG00008165001-RA	GSSPFG00008165001-RA_243-642	scaffold_23013_23354	8	14	12871	8mer	x	8mer
102	GSSPFG00000954001-RA	GSSPFG00000954001-RA_1072-1637	scaffold_23013_23354	467	473	12914	1a	x	1a
103	GSSPFG00024970001-RA	GSSPFG00024970001-RA_1387-2906	scaffold_23013_23354	517	523	13083	8mer	x	8mer
104	GSSPFG00017954001-RA	GSSPFG00017954001-RA_21337-22710	scaffold_23013_23354	1172	1178	13232	m8	x	m8
105	GSSPFG00021181001-RA	GSSPFG00021181001-RA_31276-32407	scaffold_23013_23354	120	126	13317	m8	x	m8
106	GSSPFG00023031001-RA	GSSPFG00023031001-RA_2287-3066	scaffold_23013_23354	189	195	13429	8mer	x	8mer
107	GSSPFG00023031001-RA	GSSPFG00023031001-RA_2287-3066	scaffold_23013_23354	75	81	13430	m8	x	m8
108	GSSPFG00020719001-RA	GSSPFG00020719001-RA_1573-2870	scaffold_23013_23354	1282	1288	13529	1a	x	1a
109	GSSPFG00004794001-RA	GSSPFG00004794001-RA_2073-2915	scaffold_23013_23354	184	190	13950	1a	x	1a
110	GSSPFG00031263001-RA	GSSPFG00031263001-RA_1139-2177	scaffold_23013_23354	865	871	14054	8mer	x	8mer
111	GSSPFG00024122001-RA	GSSPFG00024122001-RA_47063-48725	scaffold_23013_23354	482	488	14305	8mer	x	8mer
112	GSSPFG00001565001-RA	GSSPFG00001565001-RA_61682-62609	scaffold_23013_23354	225	231	14547	1a	x	1a
113	GSSPFG00030838001-RA	GSSPFG00030838001-RA_22213-23421	scaffold_23013_23354	889	895	14824	1a	x	1a
114	GSSPFG00021950001-RA	GSSPFG00021950001-RA_46878-47501	scaffold_23013_23354	498	504	15126	m8	x	m8
115	GSSPFG00013064001-RA	GSSPFG00013064001-RA_1340-1456	scaffold_23013_23354	5	11	15339	1a	x	1a
116	GSSPFG00005996001-RA	GSSPFG00005996001-RA_10381-11479	scaffold_23013_23354	454	460	15348	m8	x	m8
117	GSSPFG00026502001-RA	GSSPFG00026502001-RA_28553-29667	scaffold_23013_23354	310	316	15389	8mer	x	8mer
118	GSSPFG00012238001-RA	GSSPFG00012238001-RA_13547-14496	scaffold_23013_23354	543	549	15437	8mer	x	8mer
119	GSSPFG00009951001-RA	GSSPFG00009951001-RA_20677-21113	scaffold_23013_23354	154	160	15494	8mer	x	8mer
120	GSSPFG00010505001-RA	GSSPFG00010505001-RA_862-2143	scaffold_23013_23354	776	782	15704	1a	x	1a
121	GSSPFG00027806001.3-RA	GSSPFG00027806001.3-RA_10-436	scaffold_23013_23354	359	365	15843	1a	x	1a
122	GSSPFG00027068001-RA	GSSPFG00027068001-RA_185-432	scaffold_23013_23354	154	160	16038	m8	x	m8
123	GSSPFG00002916001-RA	GSSPFG00002916001-RA_18542-18629	scaffold_23013_23354	11	17	16089	8mer	x	8mer
124	GSSPFG00014083001-RA	GSSPFG00014083001-RA_35157-36502	scaffold_23013_23354	114	120	16124	1a	x	1a
125	GSSPFG00018104001-RA	GSSPFG00018104001-RA_33393-34369	scaffold_23013_23354	36	42	16317	m8	x	m8
126	GSSPFG00013274001-RA	GSSPFG00013274001-RA_8332-9230	scaffold_23013_23354	22	28	16698	8mer	x	8mer
127	GSSPFG00020670001-RA	GSSPFG00020670001-RA_581-1706	scaffold_23013_23354	733	739	16711	m8	x	m8
128	GSSPFG00004760001-RA	GSSPFG00004760001-RA_50219-51511	scaffold_23013_23354	590	596	16884	m8	x	m8
129	GSSPFG00032050001-RA	GSSPFG00032050001-RA_103729-105085	scaffold_23013_23354	1161	1167	16927	1a	x	1a
130	GSSPFG00006737001-RA	GSSPFG00006737001-RA_733-1168	scaffold_23013_23354	16	22	17043	m8	x	m8
131	GSSPFG00009798001-RA	GSSPFG00009798001-RA_9925-10509	scaffold_23013_23354	62	68	17610	8mer	x	8mer
132	GSSPFG00028795001-RA	GSSPFG00028795001-RA_26954-28005	scaffold_23013_23354	547	553	17698	m8	x	m8
133	GSSPFG00028795001-RA	GSSPFG00028795001-RA_26954-28005	scaffold_23013_23354	911	917	17699	1a	x	1a
134	GSSPFG00007379001-RA	GSSPFG00007379001-RA_1148-1400	scaffold_23013_23354	28	34	17853	m8	x	m8
135	GSSPFG00000212001-RA	GSSPFG00000212001-RA_147220-147875	scaffold_23013_23354	533	539	17949	m8	x	m8
136	GSSPFG00000123001.3-RA	GSSPFG00000123001.3-RA_24383-25310	scaffold_23013_23354	271	277	18067	1a	x	1a
137	GSSPFG00033795001-RA	GSSPFG00033795001-RA_135635-136714	scaffold_23013_23354	923	929	18136	1a	x	1a
138	GSSPFG00019744001-RA	GSSPFG00019744001-RA_87706-89047	scaffold_23013_23354	283	289	18163	m8	x	m8
139	GSSPFG00029009001-RA	GSSPFG00029009001-RA_16329-17555	scaffold_23013_23354	805	811	18217	m8	x	m8
140	GSSPFG00021327001-RA	GSSPFG00021327001-RA_26927-28322	scaffold_23013_23354	145	151	18258	m8	x	m8
141	GSSPFG00008120001-RA	GSSPFG00008120001-RA_13835-14939	scaffold_23013_23354	568	574	18320	m8	x	m8
142	GSSPFG00006403001-RA	GSSPFG00006403001-RA_5756-6317	scaffold_23013_23354	161	167	18517	1a	x	1a
143	GSSPFG00017004001-RA	GSSPFG00017004001-RA_151314-151445	scaffold_23013_23354	67	73	18570	m8	x	m8
144	GSSPFG00011778001-RA	GSSPFG00011778001-RA_3222-4065	scaffold_23013_23354	369	375	18654	8mer	x	8mer
145	GSSPFG00002329001-RA	GSSPFG00002329001-RA_75-592	scaffold_23013_23354	14	20	18691	1a	x	1a
146	GSSPFG00025659001-RA	GSSPFG00025659001-RA_12108-13567	scaffold_23013_23354	520	526	18731	1a	x	1a
147	GSSPFG00025661001.3-RA	GSSPFG00025661001.3-RA_19234-20295	scaffold_23013_23354	1026	1032	18751	8mer	x	8mer
148	GSSPFG00031241001-RA	GSSPFG00031241001-RA_20262-20617	scaffold_23013_23354	64	70	18814	8mer	x	8mer
149	GSSPFG00035392001.4-RA	GSSPFG00035392001.4-RA_69216-69354	scaffold_23013_23354	132	138	18956	m8	x	m8
150	GSSPFG00021842001-RA	GSSPFG00021842001-RA_50789-51626	scaffold_23013_23354	366	372	19144	8mer	x	8mer
151	GSSPFG00034037001-RA	GSSPFG00034037001-RA_397-612	scaffold_23013_23354	82	88	19224	1a	x	1a
152	GSSPFG00028810001-RA	GSSPFG00028810001-RA_255-1504	scaffold_23013_23354	252	258	19263	1a	x	1a
153	GSSPFG00019520001-RA	GSSPFG00019520001-RA_25580-26919	scaffold_23013_23354	1259	1265	19322	8mer	x	8mer
154	GSSPFG00013631001-RA	GSSPFG00013631001-RA_9335-10106	scaffold_23013_23354	634	640	19365	1a	x	1a
155	GSSPFG00027010001-RA	GSSPFG00027010001-RA_55013-55828	scaffold_23013_23354	203	209	19537	1a	x	1a
156	GSSPFG00011566001-RA	GSSPFG00011566001-RA_16657-17843	scaffold_23013_23354	152	158	19615	1a	x	1a
157	GSSPFG00020579001-RA	GSSPFG00020579001-RA_1628-2700	scaffold_23013_23354	996	1002	19800	m8	x	m8
158	GSSPFG00018181001-RA	GSSPFG00018181001-RA_139232-139872	scaffold_23013_23354	118	124	19836	8mer	x	8mer
159	GSSPFG00027443001-RA	GSSPFG00027443001-RA_19953-20665	scaffold_23013_23354	512	518	19880	1a	x	1a
160	GSSPFG00013847001-RA	GSSPFG00013847001-RA_10421-10725	scaffold_23013_23354	66	72	19887	1a	x	1a
161	GSSPFG00023339001-RA	GSSPFG00023339001-RA_111228-111891	scaffold_23013_23354	316	322	20101	1a	x	1a
162	GSSPFG00014065001-RA	GSSPFG00014065001-RA_12309-12873	scaffold_23013_23354	270	276	20199	1a	x	1a
163	GSSPFG00027301001-RA	GSSPFG00027301001-RA_11742-12066	scaffold_23013_23354	193	199	20746	8mer	x	8mer
164	GSSPFG00020695001-RA	GSSPFG00020695001-RA_7370-8771	scaffold_23013_23354	477	483	21089	1a	x	1a
165	GSSPFG00007266001-RA	GSSPFG00007266001-RA_10721-11297	scaffold_23013_23354	104	110	21184	m8	x	m8
166	GSSPFG00010837001-RA	GSSPFG00010837001-RA_58494-59138	scaffold_23013_23354	278	284	21311	1a	x	1a
167	GSSPFG00024488001-RA	GSSPFG00024488001-RA_73963-74894	scaffold_23013_23354	42	48	21473	m8	x	m8
168	GSSPFG00020566001-RA	GSSPFG00020566001-RA_6629-8011	scaffold_23013_23354	1274	1280	21490	1a	x	1a
169	GSSPFG00005064001-RA	GSSPFG00005064001-RA_14422-15124	scaffold_23013_23354	296	302	21622	1a	x	1a
170	GSSPFG00007081001-RA	GSSPFG00007081001-RA_5157-6404	scaffold_23013_23354	524	530	21658	1a	x	1a
171	GSSPFG00015185001.3-RA	GSSPFG00015185001.3-RA_7218-7823	scaffold_23013_23354	119	125	21909	8mer	x	8mer
172	GSSPFG00003375001-RA	GSSPFG00003375001-RA_13816-14185	scaffold_23013_23354	117	123	21918	1a	x	1a
173	GSSPFG00010136001-RA	GSSPFG00010136001-RA_6158-7171	scaffold_23013_23354	426	432	22397	m8	x	m8
174	GSSPFG00030252001-RA	GSSPFG00030252001-RA_11768-13026	scaffold_23013_23354	933	939	22438	1a	x	1a
175	GSSPFG00001944001-RA	GSSPFG00001944001-RA_16863-17565	scaffold_23013_23354	72	78	22487	8mer	x	8mer
176	GSSPFG00006795001-RA	GSSPFG00006795001-RA_16787-18014	scaffold_23013_23354	339	345	22497	m8	x	m8
177	GSSPFG00019326001-RA	GSSPFG00019326001-RA_26487-27527	scaffold_23013_23354	751	757	22538	1a	x	1a
178	GSSPFG00019342001-RA	GSSPFG00019342001-RA_132103-132522	scaffold_23013_23354	4	10	22567	1a	x	1a
179	GSSPFG00011878001-RA	GSSPFG00011878001-RA_9098-9457	scaffold_23013_23354	2	8	22582	1a	x	1a
180	GSSPFG00016507001-RA	GSSPFG00016507001-RA_3739-4690	scaffold_23013_23354	85	91	22626	1a	x	1a
181	GSSPFG00027903001-RA	GSSPFG00027903001-RA_16744-18042	scaffold_23013_23354	1148	1154	22673	1a	x	1a
182	GSSPFG00032230001-RA	GSSPFG00032230001-RA_2130-3173	scaffold_23013_23354	253	259	22875	1a	x	1a
183	GSSPFG00019093001-RA	GSSPFG00019093001-RA_16632-17684	scaffold_23013_23354	740	746	22998	8mer	x	8mer
184	GSSPFG00012594001-RA	GSSPFG00012594001-RA_125819-127060	scaffold_23013_23354	10	16	23255	m8	x	m8
185	GSSPFG00013592001.3-RA	GSSPFG00013592001.3-RA_4493-5248	scaffold_23013_23354	601	607	23284	8mer	x	8mer
186	GSSPFG00009517001.3-RA	GSSPFG00009517001.3-RA_16517-18190	scaffold_23013_23354	230	236	23368	1a	x	1a
187	GSSPFG00030758001-RA	GSSPFG00030758001-RA_229170-230406	scaffold_23013_23354	549	555	23428	1a	x	1a
188	GSSPFG00030758001-RA	GSSPFG00030758001-RA_229170-230406	scaffold_23013_23354	846	852	23429	1a	x	1a
189	GSSPFG00030764001-RA	GSSPFG00030764001-RA_300983-301917	scaffold_23013_23354	138	144	23448	m8	x	m8
190	GSSPFG00032584001-RA	GSSPFG00032584001-RA_67640-69594	scaffold_23013_23354	325	331	23515	8mer	x	8mer
191	GSSPFG00030854001-RA	GSSPFG00030854001-RA_3399-4670	scaffold_23013_23354	362	368	23560	1a	x	1a
192	GSSPFG00012430001-RA	GSSPFG00012430001-RA_12609-13523	scaffold_23013_23354	86	92	23848	1a	x	1a
193	GSSPFG00032013001-RA	GSSPFG00032013001-RA_1418-1724	scaffold_23013_23354	41	47	23850	m8	x	m8
194	GSSPFG00019994001-RA	GSSPFG00019994001-RA_1409-2526	scaffold_23013_23354	117	123	23957	1a	x	1a
195	GSSPFG00007353001-RA	GSSPFG00007353001-RA_12277-13637	scaffold_23013_23354	17	23	24012	m8	x	m8
196	GSSPFG00005272001-RA	GSSPFG00005272001-RA_9861-10630	scaffold_23013_23354	5	11	24104	1a	x	1a
197	GSSPFG00027850001-RA	GSSPFG00027850001-RA_4685-6069	scaffold_23013_23354	907	913	24337	1a	x	1a
198	GSSPFG00025017001-RA	GSSPFG00025017001-RA_121393-122205	scaffold_23013_23354	212	218	24385	m8	x	m8
199	GSSPFG00010501001-RA	GSSPFG00010501001-RA_82772-82882	scaffold_23013_23354	41	47	24429	8mer	x	8mer
200	GSSPFG00010502001-RA	GSSPFG00010502001-RA_96758-96836	scaffold_23013_23354	34	40	24433	8mer	x	8mer
201	GSSPFG00026070001-RA	GSSPFG00026070001-RA_7922-8548	scaffold_23013_23354	608	614	24648	m8	x	m8
202	GSSPFG00020717001-RA	GSSPFG00020717001-RA_8111-9343	scaffold_23013_23354	646	652	24765	1a	x	1a
203	GSSPFG00013312001-RA	GSSPFG00013312001-RA_1218-1957	scaffold_23013_23354	436	442	24834	8mer	x	8mer
204	GSSPFG00007717001-RA	GSSPFG00007717001-RA_15370-16383	scaffold_23013_23354	3	9	24953	m8	x	m8
205	GSSPFG00030767001-RA	GSSPFG00030767001-RA_305-1355	scaffold_23013_23354	578	584	25096	1a	x	1a
206	GSSPFG00022283001-RA	GSSPFG00022283001-RA_5499-6571	scaffold_23013_23354	234	240	25271	8mer	x	8mer
207	GSSPFG00021007001-RA	GSSPFG00021007001-RA_12486-12714	scaffold_23013_23354	137	143	25345	8mer	x	8mer
208	GSSPFG00016568001-RA	GSSPFG00016568001-RA_4067-5327	scaffold_23013_23354	1164	1170	25687	8mer	x	8mer
209	GSSPFG00007369001-RA	GSSPFG00007369001-RA_12624-13870	scaffold_23013_23354	1146	1152	25948	1a	x	1a
210	GSSPFG00007369001-RA	GSSPFG00007369001-RA_12624-13870	scaffold_23013_23354	993	999	25949	1a	x	1a
211	GSSPFG00028394001-RA	GSSPFG00028394001-RA_9146-9607	scaffold_23013_23354	94	100	26394	8mer	x	8mer
212	GSSPFG00031840001-RA	GSSPFG00031840001-RA_110754-111305	scaffold_23013_23354	390	396	26451	1a	x	1a
213	GSSPFG00001646001.3-RA	GSSPFG00001646001.3-RA_12737-13926	scaffold_23013_23354	667	673	26520	1a	x	1a
214	GSSPFG00013869001-RA	GSSPFG00013869001-RA_41069-41966	scaffold_23013_23354	119	125	26548	1a	x	1a
215	GSSPFG00009904001-RA	GSSPFG00009904001-RA_9570-11122	scaffold_23013_23354	1001	1007	27162	1a	x	1a
216	GSSPFG00016134001.3-RA	GSSPFG00016134001.3-RA_7444-8415	scaffold_23013_23354	963	969	27459	1a	x	1a
217	GSSPFG00004142001-RA	GSSPFG00004142001-RA_7120-8047	scaffold_23013_23354	519	525	27491	8mer	x	8mer
218	GSSPFG00014009001-RA	GSSPFG00014009001-RA_81230-82166	scaffold_23013_23354	775	781	27727	m8	x	m8
219	GSSPFG00000080001.3-RA	GSSPFG00000080001.3-RA_12353-12872	scaffold_23013_23354	306	312	27820	m8	x	m8
220	GSSPFG00004130001-RA	GSSPFG00004130001-RA_8423-8734	scaffold_23013_23354	67	73	27869	m8	x	m8
221	GSSPFG00016234001-RA	GSSPFG00016234001-RA_5541-6058	scaffold_23013_23354	494	500	27942	1a	x	1a
222	GSSPFG00007936001-RA	GSSPFG00007936001-RA_3305-4319	scaffold_23013_23354	990	996	27975	m8	x	m8
223	GSSPFG00031630001-RA	GSSPFG00031630001-RA_6847-8389	scaffold_23013_23354	818	824	28023	1a	x	1a
224	GSSPFG00028755001-RA	GSSPFG00028755001-RA_10205-10615	scaffold_23013_23354	74	80	28112	8mer	x	8mer
225	GSSPFG00010357001-RA	GSSPFG00010357001-RA_3337-4206	scaffold_23013_23354	459	465	28224	1a	x	1a
226	GSSPFG00034896001-RA	GSSPFG00034896001-RA_310456-310836	scaffold_23013_23354	174	180	28376	1a	x	1a
227	GSSPFG00010638001-RA	GSSPFG00010638001-RA_7784-9186	scaffold_23013_23354	869	875	28489	1a	x	1a
228	GSSPFG00012791001-RA	GSSPFG00012791001-RA_14571-15460	scaffold_23013_23354	808	814	28672	1a	x	1a
229	GSSPFG00024444001-RA	GSSPFG00024444001-RA_65348-65922	scaffold_23013_23354	506	512	28950	m8	x	m8
230	GSSPFG00014206001-RA	GSSPFG00014206001-RA_4522-6076	scaffold_23013_23354	497	503	29340	1a	x	1a
231	GSSPFG00014206001-RA	GSSPFG00014206001-RA_4522-6076	scaffold_23013_23354	710	716	29341	1a	x	1a
232	GSSPFG00012371001-RA	GSSPFG00012371001-RA_9127-10337	scaffold_23013_23354	279	285	29518	1a	x	1a
233	GSSPFG00025466001-RA	GSSPFG00025466001-RA_1769-1985	scaffold_23013_23354	116	122	29690	1a	x	1a
234	GSSPFG00032656001-RA	GSSPFG00032656001-RA_6669-7950	scaffold_23013_23354	63	69	29828	1a	x	1a
235	GSSPFG00012996001-RA	GSSPFG00012996001-RA_42721-43791	scaffold_23013_23354	10	16	29954	m8	x	m8
236	GSSPFG00009079001-RA	GSSPFG00009079001-RA_7334-8666	scaffold_23013_23354	503	509	30239	1a	x	1a
237	GSSPFG00023863001.3-RA	GSSPFG00023863001.3-RA_3535-4740	scaffold_23013_23354	597	603	30289	1a	x	1a
238	GSSPFG00017649001-RA	GSSPFG00017649001-RA_9467-10709	scaffold_23013_23354	454	460	30331	m8	x	m8
239	GSSPFG00009826001-RA	GSSPFG00009826001-RA_2889-4063	scaffold_23013_23354	714	720	30391	1a	x	1a
240	GSSPFG00033091001-RA	GSSPFG00033091001-RA_4531-4754	scaffold_23013_23354	9	15	30433	8mer	x	8mer
241	GSSPFG00001258001-RA	GSSPFG00001258001-RA_3914-5005	scaffold_23013_23354	1000	1006	30437	m8	x	m8
242	GSSPFG00030307001-RA	GSSPFG00030307001-RA_7261-8676	scaffold_23013_23354	463	469	30452	m8	x	m8
243	GSSPFG00024821001-RA	GSSPFG00024821001-RA_7944-8795	scaffold_23013_23354	113	119	30639	1a	x	1a
244	GSSPFG00021254001-RA	GSSPFG00021254001-RA_43443-44985	scaffold_23013_23354	747	753	30692	m8	x	m8
245	GSSPFG00003981001.2-RA	GSSPFG00003981001.2-RA_4456-4676	scaffold_23013_23354	15	21	31046	1a	x	1a
246	GSSPFG00001611001.2-RA	GSSPFG00001611001.2-RA_158-861	scaffold_23013_23354	221	227	31281	1a	x	1a
247	GSSPFG00028350001-RA	GSSPFG00028350001-RA_3091-4454	scaffold_23013_23354	390	396	31315	1a	x	1a
248	GSSPFG00022312001-RA	GSSPFG00022312001-RA_143919-145001	scaffold_23013_23354	1003	1009	31436	m8	x	m8
249	GSSPFG00022314001-RA	GSSPFG00022314001-RA_216217-216802	scaffold_23013_23354	523	529	31452	m8	x	m8
250	GSSPFG00032394001-RA	GSSPFG00032394001-RA_4865-5298	scaffold_23013_23354	168	174	31466	1a	x	1a
251	GSSPFG00011364001-RA	GSSPFG00011364001-RA_5233-6476	scaffold_23013_23354	31	37	31604	1a	x	1a
252	GSSPFG00019875001-RA	GSSPFG00019875001-RA_1283-2262	scaffold_23013_23354	1	7	31622	m8	x	m8
253	GSSPFG00008678001-RA	GSSPFG00008678001-RA_21980-22177	scaffold_23013_23354	131	137	31991	1a	x	1a
254	GSSPFG00005448001-RA	GSSPFG00005448001-RA_105034-105810	scaffold_23013_23354	75	81	32101	8mer	x	8mer
255	GSSPFG00030589001-RA	GSSPFG00030589001-RA_42808-43502	scaffold_23013_23354	492	498	32157	1a	x	1a
256	GSSPFG00032126001-RA	GSSPFG00032126001-RA_364060-365017	scaffold_23013_23354	556	562	32370	1a	x	1a
257	GSSPFG00008321001-RA	GSSPFG00008321001-RA_10768-11686	scaffold_23013_23354	157	163	32547	1a	x	1a
258	GSSPFG00014840001-RA	GSSPFG00014840001-RA_215256-216732	scaffold_23013_23354	1268	1274	32824	1a	x	1a
259	GSSPFG00025502001-RA	GSSPFG00025502001-RA_26142-27551	scaffold_23013_23354	1039	1045	32900	8mer	x	8mer
260	GSSPFG00022660001-RA	GSSPFG00022660001-RA_29721-30913	scaffold_23013_23354	636	642	33053	m8	x	m8
261	GSSPFG00005814001-RA	GSSPFG00005814001-RA_105443-106833	scaffold_23013_23354	1130	1136	33141	8mer	x	8mer
262	GSSPFG00005814001-RA	GSSPFG00005814001-RA_105443-106833	scaffold_23013_23354	1224	1230	33142	8mer	x	8mer
263	GSSPFG00008868001-RA	GSSPFG00008868001-RA_50900-52088	scaffold_23013_23354	981	987	33177	1a	x	1a
264	GSSPFG00013535001-RA	GSSPFG00013535001-RA_19586-21115	scaffold_23013_23354	384	390	33345	1a	x	1a
265	GSSPFG00024404001-RA	GSSPFG00024404001-RA_26458-26904	scaffold_23013_23354	253	259	33457	1a	x	1a
266	GSSPFG00007545001.4-RA	GSSPFG00007545001.4-RA_33323-35176	scaffold_23013_23354	664	670	33472	1a	x	1a
267	GSSPFG00007545001.4-RB	GSSPFG00007545001.4-RB_33323-35176	scaffold_23013_23354	664	670	33506	1a	x	1a
268	GSSPFG00034000001-RA	GSSPFG00034000001-RA_204243-204952	scaffold_23013_23354	254	260	33590	8mer	x	8mer
269	GSSPFG00023655001-RA	GSSPFG00023655001-RA_50622-52016	scaffold_23013_23354	397	403	33776	1a	x	1a
270	GSSPFG00012729001-RA	GSSPFG00012729001-RA_170578-171724	scaffold_23013_23354	1026	1032	33909	m8	x	m8
271	GSSPFG00004844001-RA	GSSPFG00004844001-RA_27166-28261	scaffold_23013_23354	52	58	34020	m8	x	m8
272	GSSPFG00004844001-RA	GSSPFG00004844001-RA_27166-28261	scaffold_23013_23354	892	898	34021	1a	x	1a
273	GSSPFG00000568001-RA	GSSPFG00000568001-RA_58144-59645	scaffold_23013_23354	1411	1417	34191	1a	x	1a
274	GSSPFG00031524001-RA	GSSPFG00031524001-RA_50812-51843	scaffold_23013_23354	651	657	34337	1a	x	1a
275	GSSPFG00014193001-RA	GSSPFG00014193001-RA_71538-72082	scaffold_23013_23354	258	264	34667	1a	x	1a
276	GSSPFG00020268001-RA	GSSPFG00020268001-RA_16015-17147	scaffold_23013_23354	134	140	34774	m8	x	m8
277	GSSPFG00020268001-RA	GSSPFG00020268001-RA_16015-17147	scaffold_23013_23354	290	296	34775	1a	x	1a
278	GSSPFG00020268001-RA	GSSPFG00020268001-RA_16015-17147	scaffold_23013_23354	82	88	34776	m8	x	m8
279	GSSPFG00017898001-RA	GSSPFG00017898001-RA_64463-65289	scaffold_23013_23354	23	29	34830	8mer	x	8mer
280	GSSPFG00032793001-RA	GSSPFG00032793001-RA_216045-217022	scaffold_23013_23354	327	333	35016	1a	x	1a
281	GSSPFG00021353001-RA	GSSPFG00021353001-RA_16519-17637	scaffold_23013_23354	41	47	35613	m8	x	m8
282	GSSPFG00019899001-RA	GSSPFG00019899001-RA_27305-28060	scaffold_23013_23354	582	588	35623	8mer	x	8mer
283	GSSPFG00003929001-RA	GSSPFG00003929001-RA_16901-17253	scaffold_23013_23354	322	328	35689	m8	x	m8
284	GSSPFG00028677001-RA	GSSPFG00028677001-RA_17765-18923	scaffold_23013_23354	425	431	36110	m8	x	m8
285	GSSPFG00026523001-RA	GSSPFG00026523001-RA_305550-306073	scaffold_23013_23354	200	206	36518	1a	x	1a
286	GSSPFG00032704001-RA	GSSPFG00032704001-RA_78081-78620	scaffold_23013_23354	435	441	36568	m8	x	m8
287	GSSPFG00023510001-RA	GSSPFG00023510001-RA_397826-398681	scaffold_23013_23354	592	598	36731	m8	x	m8
288	GSSPFG00021890001-RA	GSSPFG00021890001-RA_445086-446037	scaffold_23013_23354	650	656	36842	8mer	x	8mer
289	GSSPFG00020217001-RA	GSSPFG00020217001-RA_199113-199577	scaffold_23013_23354	23	29	36985	1a	x	1a
290	GSSPFG00008459001-RA	GSSPFG00008459001-RA_37464-38812	scaffold_23013_23354	222	228	37012	8mer	x	8mer
291	GSSPFG00016111001-RA	GSSPFG00016111001-RA_85067-86553	scaffold_23013_23354	1407	1413	37065	8mer	x	8mer
292	GSSPFG00023951001-RA	GSSPFG00023951001-RA_81410-82239	scaffold_23013_23354	439	445	37398	1a	x	1a
293	GSSPFG00020483001-RA	GSSPFG00020483001-RA_9061-10766	scaffold_23013_23354	286	292	37498	1a	x	1a
294	GSSPFG00023265001-RA	GSSPFG00023265001-RA_81261-82324	scaffold_23013_23354	826	832	37745	1a	x	1a
295	GSSPFG00026820001-RA	GSSPFG00026820001-RA_56803-56874	scaffold_23013_23354	48	54	37866	m8	x	m8
296	GSSPFG00035542001.3-RA	GSSPFG00035542001.3-RA_109715-110556	scaffold_23013_23354	656	662	37969	1a	x	1a
297	GSSPFG00010706001-RA	GSSPFG00010706001-RA_72452-73467	scaffold_23013_23354	646	652	37994	m8	x	m8
298	GSSPFG00011441001-RA	GSSPFG00011441001-RA_21092-22005	scaffold_23013_23354	764	770	38503	8mer	x	8mer
299	GSSPFG00033924001-RA	GSSPFG00033924001-RA_50983-52116	scaffold_23013_23354	143	149	38684	8mer	x	8mer
300	GSSPFG00011276001-RA	GSSPFG00011276001-RA_179360-180393	scaffold_23013_23354	480	486	38712	m8	x	m8
301	GSSPFG00026349001-RA	GSSPFG00026349001-RA_410994-412118	scaffold_23013_23354	536	542	38823	m8	x	m8
302	GSSPFG00030620001-RA	GSSPFG00030620001-RA_181829-182438	scaffold_23013_23354	83	89	39010	1a	x	1a
303	GSSPFG00030626001-RA	GSSPFG00030626001-RA_200355-201427	scaffold_23013_23354	242	248	39011	1a	x	1a
304	GSSPFG00030639001-RA	GSSPFG00030639001-RA_274092-274867	scaffold_23013_23354	538	544	39057	1a	x	1a
305	GSSPFG00028256001-RA	GSSPFG00028256001-RA_105093-106425	scaffold_23013_23354	433	439	39101	1a	x	1a
306	GSSPFG00024269001-RA	GSSPFG00024269001-RA_5137-6059	scaffold_23013_23354	370	376	39320	m8	x	m8
307	GSSPFG00016824001-RA	GSSPFG00016824001-RA_804-1473	scaffold_23013_23354	139	145	39506	m8	x	m8
308	GSSPFG00025987001.2-RA	GSSPFG00025987001.2-RA_45680-46958	scaffold_23013_23354	265	271	39553	m8	x	m8
309	GSSPFG00006030001-RA	GSSPFG00006030001-RA_124040-125575	scaffold_23013_23354	78	84	40175	1a	x	1a
310	GSSPFG00027425001-RA	GSSPFG00027425001-RA_39706-40110	scaffold_23013_23354	343	349	40379	1a	x	1a
311	GSSPFG00008660001-RA	GSSPFG00008660001-RA_1597-2843	scaffold_23013_23354	194	200	40488	1a	x	1a
312	GSSPFG00010243001-RA	GSSPFG00010243001-RA_91507-93015	scaffold_23013_23354	836	842	41043	1a	x	1a
313	GSSPFG00016198001-RA	GSSPFG00016198001-RA_198513-199638	scaffold_23013_23354	201	207	41077	m8	x	m8
314	GSSPFG00020497001-RA	GSSPFG00020497001-RA_109255-109609	scaffold_23013_23354	292	298	41115	8mer	x	8mer
315	GSSPFG00012556001-RA	GSSPFG00012556001-RA_264857-266002	scaffold_23013_23354	296	302	41297	1a	x	1a
316	GSSPFG00012558001-RA	GSSPFG00012558001-RA_269672-270817	scaffold_23013_23354	296	302	41311	1a	x	1a
317	GSSPFG00006241001.2-RA	GSSPFG00006241001.2-RA_181764-185672	scaffold_23013_23354	1908	1914	41798	m8	x	m8
318	GSSPFG00006241001.2-RB	GSSPFG00006241001.2-RB_181764-185672	scaffold_23013_23354	1908	1914	41853	m8	x	m8
319	GSSPFG00016808001-RA	GSSPFG00016808001-RA_1794-2849	scaffold_23013_23354	13	19	41988	1a	x	1a
320	GSSPFG00025358001-RA	GSSPFG00025358001-RA_71122-71404	scaffold_23013_23354	183	189	42074	1a	x	1a
321	GSSPFG00034472001-RA	GSSPFG00034472001-RA_10695-12056	scaffold_23013_23354	1304	1310	42169	8mer	x	8mer
miR190
Row	Gene_ID	Gene_ID	miRNA_family_ID	UTR_start	UTR_end	Group_num	Site_type	miRNA in this species	Group_type
1	GSSPFG00004305001-RA	GSSPFG00004305001-RA_2960-3928	scaffold_20102_22509	188	194	6	1a	x	1a
2	GSSPFG00004305001-RA	GSSPFG00004305001-RA_2960-3928	scaffold_20102_22509	387	393	7	8mer	x	8mer
3	GSSPFG00034587001-RA	GSSPFG00034587001-RA_54899-55682	scaffold_20102_22509	573	579	19	1a	x	1a
4	GSSPFG00010982001.2-RA	GSSPFG00010982001.2-RA_74334-81324	scaffold_20102_22509	1922	1928	167	1a	x	1a
5	GSSPFG00025213001.3-RA	GSSPFG00025213001.3-RA_59309-62142	scaffold_20102_22509	1408	1414	305	8mer	x	8mer
6	GSSPFG00034291001-RA	GSSPFG00034291001-RA_11353-11650	scaffold_20102_22509	169	175	412	8mer	x	8mer
7	GSSPFG00027360001-RA	GSSPFG00027360001-RA_2768-3952	scaffold_20102_22509	153	159	495	1a	x	1a
8	GSSPFG00029515001-RA	GSSPFG00029515001-RA_209678-210916	scaffold_20102_22509	228	234	599	8mer	x	8mer
9	GSSPFG00029516001-RA	GSSPFG00029516001-RA_212932-213603	scaffold_20102_22509	235	241	622	8mer	x	8mer
10	GSSPFG00029520001-RA	GSSPFG00029520001-RA_222706-223717	scaffold_20102_22509	467	473	642	8mer	x	8mer
11	GSSPFG00000700001-RA	GSSPFG00000700001-RA_416-511	scaffold_20102_22509	81	87	811	8mer	x	8mer
12	GSSPFG00016871001.3-RA	GSSPFG00016871001.3-RA_1942-3464	scaffold_20102_22509	1265	1271	991	m8	x	m8
13	GSSPFG00025391001-RA	GSSPFG00025391001-RA_59783-61058	scaffold_20102_22509	1038	1044	1060	1a	x	1a
14	GSSPFG00032687001-RA	GSSPFG00032687001-RA_7508-7856	scaffold_20102_22509	287	293	1085	m8	x	m8
15	GSSPFG00030887001-RA	GSSPFG00030887001-RA_2935-3356	scaffold_20102_22509	223	229	1213	8mer	x	8mer
16	GSSPFG00011175001-RA	GSSPFG00011175001-RA_4449-5569	scaffold_20102_22509	471	477	1228	1a	x	1a
17	GSSPFG00021231001-RA	GSSPFG00021231001-RA_3385-4526	scaffold_20102_22509	813	819	1285	m8	x	m8
18	GSSPFG00015558001-RA	GSSPFG00015558001-RA_2989-4538	scaffold_20102_22509	1182	1188	1338	m8	x	m8
19	GSSPFG00023824001-RA	GSSPFG00023824001-RA_175970-176068	scaffold_20102_22509	41	47	1856	1a	x	1a
20	GSSPFG00008854001-RA	GSSPFG00008854001-RA_57663-58092	scaffold_20102_22509	93	99	1951	m8	x	m8
21	GSSPFG00004567001-RA	GSSPFG00004567001-RA_34647-35464	scaffold_20102_22509	625	631	2001	8mer	x	8mer
22	GSSPFG00031182001-RA	GSSPFG00031182001-RA_861-1857	scaffold_20102_22509	385	391	2017	1a	x	1a
23	GSSPFG00009607001-RA	GSSPFG00009607001-RA_6823-8002	scaffold_20102_22509	465	471	2094	1a	x	1a
24	GSSPFG00022246001-RA	GSSPFG00022246001-RA_84705-86084	scaffold_20102_22509	627	633	2121	m8	x	m8
25	GSSPFG00007777001.2-RA	GSSPFG00007777001.2-RA_4467-5882	scaffold_20102_22509	1104	1110	2238	1a	x	1a
26	GSSPFG00026409001-RA	GSSPFG00026409001-RA_6729-7700	scaffold_20102_22509	11	17	2333	1a	x	1a
27	GSSPFG00001123001-RA	GSSPFG00001123001-RA_244584-245681	scaffold_20102_22509	143	149	2432	8mer	x	8mer
28	GSSPFG00006231001-RA	GSSPFG00006231001-RA_487-1570	scaffold_20102_22509	650	656	2515	m8	x	m8
29	GSSPFG00011597001-RA	GSSPFG00011597001-RA_58182-59347	scaffold_20102_22509	345	351	2540	m8	x	m8
30	GSSPFG00004681001-RA	GSSPFG00004681001-RA_7591-8472	scaffold_20102_22509	428	434	2574	1a	x	1a
31	GSSPFG00004681001-RA	GSSPFG00004681001-RA_7591-8472	scaffold_20102_22509	542	548	2575	m8	x	m8
32	GSSPFG00032380001-RA	GSSPFG00032380001-RA_6894-7183	scaffold_20102_22509	9	15	2616	m8	x	m8
33	GSSPFG00006544001-RA	GSSPFG00006544001-RA_5271-6508	scaffold_20102_22509	152	158	2727	1a	x	1a
34	GSSPFG00006544001-RA	GSSPFG00006544001-RA_5271-6508	scaffold_20102_22509	169	175	2728	1a	x	1a
35	GSSPFG00026448001-RA	GSSPFG00026448001-RA_5083-6082	scaffold_20102_22509	737	743	2919	m8	x	m8
36	GSSPFG00018258001-RA	GSSPFG00018258001-RA_5611-7034	scaffold_20102_22509	800	806	2996	1a	x	1a
37	GSSPFG00014707001-RA	GSSPFG00014707001-RA_46586-46896	scaffold_20102_22509	151	157	3026	8mer	x	8mer
38	GSSPFG00014708001-RA	GSSPFG00014708001-RA_53958-54984	scaffold_20102_22509	151	157	3039	8mer	x	8mer
39	GSSPFG00006703001-RA	GSSPFG00006703001-RA_59363-60349	scaffold_20102_22509	538	544	3082	m8	x	m8
40	GSSPFG00027683001-RA	GSSPFG00027683001-RA_6738-7237	scaffold_20102_22509	143	149	3122	m8	x	m8
41	GSSPFG00018593001-RA	GSSPFG00018593001-RA_6134-6211	scaffold_20102_22509	43	49	3129	8mer	x	8mer
42	GSSPFG00028826001-RA	GSSPFG00028826001-RA_2689-4233	scaffold_20102_22509	513	519	3184	8mer	x	8mer
43	GSSPFG00030774001-RA	GSSPFG00030774001-RA_155332-156338	scaffold_20102_22509	317	323	3324	m8	x	m8
44	GSSPFG00002257001-RA	GSSPFG00002257001-RA_1448-2608	scaffold_20102_22509	824	830	3406	1a	x	1a
45	GSSPFG00002258001-RA	GSSPFG00002258001-RA_5948-6320	scaffold_20102_22509	22	28	3420	8mer	x	8mer
46	GSSPFG00014508001-RA	GSSPFG00014508001-RA_3671-4576	scaffold_20102_22509	634	640	3535	1a	x	1a
47	GSSPFG00017422001-RA	GSSPFG00017422001-RA_3797-4820	scaffold_20102_22509	555	561	3568	m8	x	m8
48	GSSPFG00017422001-RA	GSSPFG00017422001-RA_3797-4820	scaffold_20102_22509	609	615	3569	m8	x	m8
49	GSSPFG00009235001-RA	GSSPFG00009235001-RA_2095-3075	scaffold_20102_22509	344	350	3656	1a	x	1a
50	GSSPFG00008731001.2-RA	GSSPFG00008731001.2-RA_4393-5301	scaffold_20102_22509	688	694	3673	8mer	x	8mer
51	GSSPFG00013202001-RA	GSSPFG00013202001-RA_1938-2949	scaffold_20102_22509	355	361	3775	1a	x	1a
52	GSSPFG00024975001-RA	GSSPFG00024975001-RA_5463-6252	scaffold_20102_22509	71	77	3917	8mer	x	8mer
53	GSSPFG00010922001.3-RA	GSSPFG00010922001.3-RA_3314-4691	scaffold_20102_22509	552	558	4048	m8	x	m8
54	GSSPFG00008372001-RA	GSSPFG00008372001-RA_949-1848	scaffold_20102_22509	103	109	4134	1a	x	1a
55	GSSPFG00025729001-RA	GSSPFG00025729001-RA_3034-3801	scaffold_20102_22509	428	434	4149	1a	x	1a
56	GSSPFG00005141001-RA	GSSPFG00005141001-RA_42266-43273	scaffold_20102_22509	869	875	4162	m8	x	m8
57	GSSPFG00015149001-RA	GSSPFG00015149001-RA_5242-5795	scaffold_20102_22509	183	189	4310	1a	x	1a
58	GSSPFG00004171001-RA	GSSPFG00004171001-RA_62479-63556	scaffold_20102_22509	642	648	4428	1a	x	1a
59	GSSPFG00004173001-RA	GSSPFG00004173001-RA_67298-68891	scaffold_20102_22509	1174	1180	4446	8mer	x	8mer
60	GSSPFG00014072001-RA	GSSPFG00014072001-RA_4415-5750	scaffold_20102_22509	865	871	4647	m8	x	m8
61	GSSPFG00035050001.2-RA	GSSPFG00035050001.2-RA_4808-7057	scaffold_20102_22509	1604	1610	4708	1a	x	1a
62	GSSPFG00017310001-RA	GSSPFG00017310001-RA_2505-3991	scaffold_20102_22509	1069	1075	4967	m8	x	m8
63	GSSPFG00033966001-RA	GSSPFG00033966001-RA_3401-4239	scaffold_20102_22509	305	311	5015	8mer	x	8mer
64	GSSPFG00013406001-RA	GSSPFG00013406001-RA_58577-59589	scaffold_20102_22509	402	408	5089	m8	x	m8
65	GSSPFG00002187001-RA	GSSPFG00002187001-RA_1215-2378	scaffold_20102_22509	546	552	5107	1a	x	1a
66	GSSPFG00006882001-RA	GSSPFG00006882001-RA_2616-4079	scaffold_20102_22509	32	38	5191	1a	x	1a
67	GSSPFG00026864001-RA	GSSPFG00026864001-RA_4102-4432	scaffold_20102_22509	68	74	5223	8mer	x	8mer
68	GSSPFG00021125001-RA	GSSPFG00021125001-RA_5453-5879	scaffold_20102_22509	134	140	5239	1a	x	1a
69	GSSPFG00020411001-RA	GSSPFG00020411001-RA_4805-5345	scaffold_20102_22509	58	64	5418	1a	x	1a
70	GSSPFG00010240001.3-RA	GSSPFG00010240001.3-RA_4092-5629	scaffold_20102_22509	418	424	5439	1a	x	1a
71	GSSPFG00019087001-RA	GSSPFG00019087001-RA_935-1976	scaffold_20102_22509	489	495	5553	1a	x	1a
72	GSSPFG00019087001-RA	GSSPFG00019087001-RA_935-1976	scaffold_20102_22509	878	884	5554	8mer	x	8mer
73	GSSPFG00010728001-RA	GSSPFG00010728001-RA_6178-6409	scaffold_20102_22509	193	199	5558	m8	x	m8
74	GSSPFG00029284001-RA	GSSPFG00029284001-RA_136371-137413	scaffold_20102_22509	990	996	5718	m8	x	m8
75	GSSPFG00012139001-RA	GSSPFG00012139001-RA_213-1423	scaffold_20102_22509	796	802	5789	8mer	x	8mer
76	GSSPFG00025710001-RA	GSSPFG00025710001-RA_209695-210372	scaffold_20102_22509	244	250	5835	m8	x	m8
77	GSSPFG00005016001-RA	GSSPFG00005016001-RA_15227-16354	scaffold_20102_22509	15	21	6079	m8	x	m8
78	GSSPFG00032373001-RA	GSSPFG00032373001-RA_3968-4957	scaffold_20102_22509	455	461	6411	m8	x	m8
79	GSSPFG00007073001-RA	GSSPFG00007073001-RA_5412-6228	scaffold_20102_22509	629	635	6547	m8	x	m8
80	GSSPFG00030409001-RA	GSSPFG00030409001-RA_1314-2514	scaffold_20102_22509	596	602	6644	m8	x	m8
81	GSSPFG00033685001-RA	GSSPFG00033685001-RA_6548-6637	scaffold_20102_22509	49	55	6729	1a	x	1a
82	GSSPFG00006148001-RA	GSSPFG00006148001-RA_263133-263934	scaffold_20102_22509	725	731	6739	1a	x	1a
83	GSSPFG00000284001-RA	GSSPFG00000284001-RA_1715-3090	scaffold_20102_22509	795	801	6787	m8	x	m8
84	GSSPFG00006613001-RA	GSSPFG00006613001-RA_4227-5611	scaffold_20102_22509	72	78	6981	m8	x	m8
85	GSSPFG00022344001-RA	GSSPFG00022344001-RA_45221-46621	scaffold_20102_22509	1275	1281	7052	8mer	x	8mer
86	GSSPFG00031082001-RA	GSSPFG00031082001-RA_115-877	scaffold_20102_22509	81	87	7484	8mer	x	8mer
87	GSSPFG00029496001-RA	GSSPFG00029496001-RA_2830-3049	scaffold_20102_22509	71	77	7504	1a	x	1a
88	GSSPFG00001087001-RA	GSSPFG00001087001-RA_4363-5272	scaffold_20102_22509	387	393	7527	m8	x	m8
89	GSSPFG00010904001-RA	GSSPFG00010904001-RA_120083-121113	scaffold_20102_22509	783	789	7581	1a	x	1a
90	GSSPFG00010913001-RA	GSSPFG00010913001-RA_168896-169607	scaffold_20102_22509	607	613	7596	m8	x	m8
91	GSSPFG00006314001-RA	GSSPFG00006314001-RA_1506-2515	scaffold_20102_22509	778	784	7733	1a	x	1a
92	GSSPFG00007837001-RA	GSSPFG00007837001-RA_4180-4993	scaffold_20102_22509	117	123	7817	1a	x	1a
93	GSSPFG00015368001-RA	GSSPFG00015368001-RA_17472-18685	scaffold_20102_22509	841	847	7901	8mer	x	8mer
94	GSSPFG00015371001-RA	GSSPFG00015371001-RA_24979-25502	scaffold_20102_22509	216	222	7955	8mer	x	8mer
95	GSSPFG00011317001-RA	GSSPFG00011317001-RA_3848-4037	scaffold_20102_22509	160	166	8042	m8	x	m8
96	GSSPFG00004887001-RA	GSSPFG00004887001-RA_2247-2462	scaffold_20102_22509	156	162	8072	m8	x	m8
97	GSSPFG00004887001-RA	GSSPFG00004887001-RA_2247-2462	scaffold_20102_22509	165	171	8073	1a	x	1a
98	GSSPFG00009971001-RA	GSSPFG00009971001-RA_2459-2650	scaffold_20102_22509	25	31	8146	1a	x	1a
99	GSSPFG00033522001-RA	GSSPFG00033522001-RA_2973-4234	scaffold_20102_22509	523	529	8178	m8	x	m8
100	GSSPFG00009584001-RA	GSSPFG00009584001-RA_165595-166894	scaffold_20102_22509	573	579	8401	1a	x	1a
101	GSSPFG00007694001-RA	GSSPFG00007694001-RA_25030-26324	scaffold_20102_22509	926	932	8491	m8	x	m8
102	GSSPFG00028500001-RA	GSSPFG00028500001-RA_192978-193387	scaffold_20102_22509	87	93	8529	1a	x	1a
103	GSSPFG00000504001-RA	GSSPFG00000504001-RA_188415-189452	scaffold_20102_22509	401	407	8619	m8	x	m8
104	GSSPFG00000127001-RA	GSSPFG00000127001-RA_27237-28340	scaffold_20102_22509	442	448	8705	m8	x	m8
105	GSSPFG00032551001-RA	GSSPFG00032551001-RA_2491-3588	scaffold_20102_22509	35	41	8742	1a	x	1a
106	GSSPFG00028680001-RA	GSSPFG00028680001-RA_1350-1897	scaffold_20102_22509	431	437	8766	1a	x	1a
107	GSSPFG00000748001-RA	GSSPFG00000748001-RA_197-816	scaffold_20102_22509	66	72	8858	m8	x	m8
108	GSSPFG00026193001.3-RA	GSSPFG00026193001.3-RA_43041-44332	scaffold_20102_22509	313	319	8879	1a	x	1a
109	GSSPFG00019052001-RA	GSSPFG00019052001-RA_2857-3037	scaffold_20102_22509	35	41	8914	1a	x	1a
110	GSSPFG00017650001-RA	GSSPFG00017650001-RA_1025-1545	scaffold_20102_22509	459	465	8925	m8	x	m8
111	GSSPFG00028417001-RA	GSSPFG00028417001-RA_10529-10978	scaffold_20102_22509	187	193	8928	1a	x	1a
112	GSSPFG00010965001-RA	GSSPFG00010965001-RA_190-1287	scaffold_20102_22509	614	620	8990	1a	x	1a
113	GSSPFG00017186001-RA	GSSPFG00017186001-RA_32068-32169	scaffold_20102_22509	46	52	9038	m8	x	m8
114	GSSPFG00017188001-RA	GSSPFG00017188001-RA_49097-49820	scaffold_20102_22509	358	364	9045	1a	x	1a
115	GSSPFG00017188001-RA	GSSPFG00017188001-RA_49097-49820	scaffold_20102_22509	615	621	9046	1a	x	1a
116	GSSPFG00002209001-RA	GSSPFG00002209001-RA_930-1726	scaffold_20102_22509	600	606	9110	1a	x	1a
117	GSSPFG00017290001.2-RC	GSSPFG00017290001.2-RC_1754-4087	scaffold_20102_22509	553	559	9212	m8	x	m8
118	GSSPFG00004392001-RA	GSSPFG00004392001-RA_706-1250	scaffold_20102_22509	13	19	9309	m8	x	m8
119	GSSPFG00014853001-RA	GSSPFG00014853001-RA_3368-4583	scaffold_20102_22509	24	30	9357	8mer	x	8mer
120	GSSPFG00014853001-RA	GSSPFG00014853001-RA_3368-4583	scaffold_20102_22509	334	340	9358	1a	x	1a
121	GSSPFG00014853001-RA	GSSPFG00014853001-RA_3368-4583	scaffold_20102_22509	435	441	9359	m8	x	m8
122	GSSPFG00022364001.3-RA	GSSPFG00022364001.3-RA_17952-18632	scaffold_20102_22509	236	242	9376	m8	x	m8
123	GSSPFG00008148001-RA	GSSPFG00008148001-RA_38819-40514	scaffold_20102_22509	1576	1582	9470	m8	x	m8
124	GSSPFG00024513001-RA	GSSPFG00024513001-RA_3770-3853	scaffold_20102_22509	46	52	9639	8mer	x	8mer
125	GSSPFG00015874001-RA	GSSPFG00015874001-RA_34466-35472	scaffold_20102_22509	154	160	9745	1a	x	1a
126	GSSPFG00011773001-RA	GSSPFG00011773001-RA_2203-3140	scaffold_20102_22509	834	840	9893	1a	x	1a
127	GSSPFG00011773001-RA	GSSPFG00011773001-RA_2203-3140	scaffold_20102_22509	867	873	9894	1a	x	1a
128	GSSPFG00032778001-RA	GSSPFG00032778001-RA_3136-3772	scaffold_20102_22509	334	340	10024	1a	x	1a
129	GSSPFG00025949001.2-RA	GSSPFG00025949001.2-RA_99444-100940	scaffold_20102_22509	316	322	10103	1a	x	1a
130	GSSPFG00005985001-RA	GSSPFG00005985001-RA_29130-29752	scaffold_20102_22509	150	156	10151	m8	x	m8
131	GSSPFG00005991001-RA	GSSPFG00005991001-RA_50322-51658	scaffold_20102_22509	295	301	10185	1a	x	1a
132	GSSPFG00005991001-RA	GSSPFG00005991001-RA_50322-51658	scaffold_20102_22509	955	961	10186	8mer	x	8mer
133	GSSPFG00032287001-RA	GSSPFG00032287001-RA_29804-30265	scaffold_20102_22509	415	421	10221	8mer	x	8mer
134	GSSPFG00028940001-RA	GSSPFG00028940001-RA_46444-47837	scaffold_20102_22509	1139	1145	10252	m8	x	m8
135	GSSPFG00028951001-RA	GSSPFG00028951001-RA_189360-190067	scaffold_20102_22509	574	580	10321	1a	x	1a
136	GSSPFG00019463001-RA	GSSPFG00019463001-RA_2024-2597	scaffold_20102_22509	141	147	10344	8mer	x	8mer
137	GSSPFG00014267001-RA	GSSPFG00014267001-RA_40219-41993	scaffold_20102_22509	1331	1337	10389	m8	x	m8
138	GSSPFG00014267001-RA	GSSPFG00014267001-RA_40219-41993	scaffold_20102_22509	1385	1391	10390	m8	x	m8
139	GSSPFG00018850001-RA	GSSPFG00018850001-RA_28093-28758	scaffold_20102_22509	24	30	10606	1a	x	1a
140	GSSPFG00013289001-RA	GSSPFG00013289001-RA_1605-3070	scaffold_20102_22509	60	66	10635	m8	x	m8
141	GSSPFG00033431001-RA	GSSPFG00033431001-RA_21283-22194	scaffold_20102_22509	439	445	10821	m8	x	m8
142	GSSPFG00002076001-RA	GSSPFG00002076001-RA_234-1195	scaffold_20102_22509	585	591	10846	1a	x	1a
143	GSSPFG00021718001-RA	GSSPFG00021718001-RA_3276-3742	scaffold_20102_22509	318	324	11054	1a	x	1a
144	GSSPFG00021658001-RA	GSSPFG00021658001-RA_8683-10137	scaffold_20102_22509	1200	1206	11136	m8	x	m8
145	GSSPFG00021658001-RA	GSSPFG00021658001-RA_8683-10137	scaffold_20102_22509	761	767	11137	1a	x	1a
146	GSSPFG00006185001-RA	GSSPFG00006185001-RA_3889-4209	scaffold_20102_22509	120	126	11251	1a	x	1a
147	GSSPFG00023663001-RA	GSSPFG00023663001-RA_21161-22542	scaffold_20102_22509	1016	1022	11623	m8	x	m8
148	GSSPFG00006167001-RA	GSSPFG00006167001-RA_3745-5080	scaffold_20102_22509	462	468	11638	8mer	x	8mer
149	GSSPFG00006177001-RA	GSSPFG00006177001-RA_67937-69077	scaffold_20102_22509	1104	1110	11659	1a	x	1a
150	GSSPFG00029432001-RA	GSSPFG00029432001-RA_35925-37480	scaffold_20102_22509	891	897	11751	1a	x	1a
151	GSSPFG00003755001-RA	GSSPFG00003755001-RA_583-858	scaffold_20102_22509	76	82	11816	1a	x	1a
152	GSSPFG00031998001-RA	GSSPFG00031998001-RA_2127-2653	scaffold_20102_22509	57	63	12296	1a	x	1a
153	GSSPFG00035219001.3-RA	GSSPFG00035219001.3-RA_2897-3842	scaffold_20102_22509	89	95	12418	1a	x	1a
154	GSSPFG00029828001-RA	GSSPFG00029828001-RA_450-970	scaffold_20102_22509	432	438	12492	m8	x	m8
155	GSSPFG00021056001.3-RA	GSSPFG00021056001.3-RA_145469-147020	scaffold_20102_22509	1430	1436	12515	1a	x	1a
156	GSSPFG00029102001-RA	GSSPFG00029102001-RA_9428-10177	scaffold_20102_22509	561	567	12896	1a	x	1a
157	GSSPFG00015863001-RA	GSSPFG00015863001-RA_530-1535	scaffold_20102_22509	875	881	13214	1a	x	1a
158	GSSPFG00021181001-RA	GSSPFG00021181001-RA_31276-32407	scaffold_20102_22509	279	285	13313	8mer	x	8mer
159	GSSPFG00021181001-RA	GSSPFG00021181001-RA_31276-32407	scaffold_20102_22509	866	872	13314	m8	x	m8
160	GSSPFG00028537001-RA	GSSPFG00028537001-RA_33254-34789	scaffold_20102_22509	616	622	13356	m8	x	m8
161	GSSPFG00030711001-RA	GSSPFG00030711001-RA_42578-43577	scaffold_20102_22509	835	841	13391	1a	x	1a
162	GSSPFG00024053001-RA	GSSPFG00024053001-RA_39568-40390	scaffold_20102_22509	464	470	13853	8mer	x	8mer
163	GSSPFG00024729001.2-RA	GSSPFG00024729001.2-RA_141544-142548	scaffold_20102_22509	85	91	14195	8mer	x	8mer
164	GSSPFG00031486001-RA	GSSPFG00031486001-RA_1090-1782	scaffold_20102_22509	525	531	14344	1a	x	1a
165	GSSPFG00001565001-RA	GSSPFG00001565001-RA_61682-62609	scaffold_20102_22509	495	501	14543	8mer	x	8mer
166	GSSPFG00033269001-RA	GSSPFG00033269001-RA_1408-2368	scaffold_20102_22509	828	834	14709	8mer	x	8mer
167	GSSPFG00026061001-RA	GSSPFG00026061001-RA_806-979	scaffold_20102_22509	11	17	15140	1a	x	1a
168	GSSPFG00020541001-RA	GSSPFG00020541001-RA_363622-363990	scaffold_20102_22509	118	124	15161	m8	x	m8
169	GSSPFG00015264001-RA	GSSPFG00015264001-RA_22553-23114	scaffold_20102_22509	331	337	15183	1a	x	1a
170	GSSPFG00028110001-RA	GSSPFG00028110001-RA_26271-26876	scaffold_20102_22509	401	407	15217	1a	x	1a
171	GSSPFG00028110001-RA	GSSPFG00028110001-RA_26271-26876	scaffold_20102_22509	518	524	15218	1a	x	1a
172	GSSPFG00021498001-RA	GSSPFG00021498001-RA_333-1096	scaffold_20102_22509	404	410	15546	1a	x	1a
173	GSSPFG00016458001-RA	GSSPFG00016458001-RA_24279-24819	scaffold_20102_22509	322	328	15645	1a	x	1a
174	GSSPFG00035275001.3-RA	GSSPFG00035275001.3-RA_16637-16779	scaffold_20102_22509	20	26	15684	m8	x	m8
175	GSSPFG00019887001-RA	GSSPFG00019887001-RA_24585-26022	scaffold_20102_22509	664	670	15946	1a	x	1a
176	GSSPFG00026534001-RA	GSSPFG00026534001-RA_5852-7453	scaffold_20102_22509	645	651	15980	m8	x	m8
177	GSSPFG00024351001-RA	GSSPFG00024351001-RA_1006-2295	scaffold_20102_22509	937	943	16058	m8	x	m8
178	GSSPFG00033369001-RA	GSSPFG00033369001-RA_4003-4371	scaffold_20102_22509	319	325	16088	1a	x	1a
179	GSSPFG00004741001-RA	GSSPFG00004741001-RA_1790-2159	scaffold_20102_22509	259	265	16301	1a	x	1a
180	GSSPFG00014964001-RA	GSSPFG00014964001-RA_28605-29730	scaffold_20102_22509	580	586	16330	8mer	x	8mer
181	GSSPFG00014964001-RA	GSSPFG00014964001-RA_28605-29730	scaffold_20102_22509	649	655	16331	1a	x	1a
182	GSSPFG00013404001-RA	GSSPFG00013404001-RA_29034-29900	scaffold_20102_22509	476	482	16449	m8	x	m8
183	GSSPFG00012309001-RA	GSSPFG00012309001-RA_20846-21132	scaffold_20102_22509	182	188	16485	m8	x	m8
184	GSSPFG00034720001-RA	GSSPFG00034720001-RA_302139-302972	scaffold_20102_22509	445	451	16544	m8	x	m8
185	GSSPFG00010782001-RA	GSSPFG00010782001-RA_4552-6081	scaffold_20102_22509	125	131	16618	m8	x	m8
186	GSSPFG00010782001-RA	GSSPFG00010782001-RA_4552-6081	scaffold_20102_22509	438	444	16619	m8	x	m8
187	GSSPFG00031035001-RA	GSSPFG00031035001-RA_1526-1721	scaffold_20102_22509	50	56	16671	8mer	x	8mer
188	GSSPFG00005118001-RA	GSSPFG00005118001-RA_1533-2273	scaffold_20102_22509	529	535	16735	8mer	x	8mer
189	GSSPFG00014422001-RA	GSSPFG00014422001-RA_7555-8598	scaffold_20102_22509	644	650	16783	m8	x	m8
190	GSSPFG00004559001-RA	GSSPFG00004559001-RA_32510-32797	scaffold_20102_22509	43	49	16858	8mer	x	8mer
191	GSSPFG00003002001-RA	GSSPFG00003002001-RA_11611-12873	scaffold_20102_22509	855	861	16954	8mer	x	8mer
192	GSSPFG00029923001-RA	GSSPFG00029923001-RA_5336-6549	scaffold_20102_22509	402	408	16966	1a	x	1a
193	GSSPFG00030094001-RA	GSSPFG00030094001-RA_653-856	scaffold_20102_22509	8	14	17082	8mer	x	8mer
194	GSSPFG00032632001-RA	GSSPFG00032632001-RA_21054-21598	scaffold_20102_22509	316	322	17097	1a	x	1a
195	GSSPFG00014235001-RA	GSSPFG00014235001-RA_9996-10785	scaffold_20102_22509	741	747	17157	1a	x	1a
196	GSSPFG00013725001-RA	GSSPFG00013725001-RA_651-723	scaffold_20102_22509	43	49	17453	8mer	x	8mer
197	GSSPFG00012867001.3-RA	GSSPFG00012867001.3-RA_414-1434	scaffold_20102_22509	100	106	17630	m8	x	m8
198	GSSPFG00034020001-RA	GSSPFG00034020001-RA_14865-15732	scaffold_20102_22509	39	45	17650	8mer	x	8mer
199	GSSPFG00017385001-RA	GSSPFG00017385001-RA_1007-1981	scaffold_20102_22509	334	340	17673	m8	x	m8
200	GSSPFG00001720001-RA	GSSPFG00001720001-RA_7150-8407	scaffold_20102_22509	1189	1195	17707	8mer	x	8mer
201	GSSPFG00024020001-RA	GSSPFG00024020001-RA_660-1218	scaffold_20102_22509	250	256	17733	m8	x	m8
202	GSSPFG00006372001-RA	GSSPFG00006372001-RA_212-574	scaffold_20102_22509	228	234	17844	1a	x	1a
203	GSSPFG00010854001-RA	GSSPFG00010854001-RA_5343-6635	scaffold_20102_22509	1101	1107	18198	m8	x	m8
204	GSSPFG00021327001-RA	GSSPFG00021327001-RA_26927-28322	scaffold_20102_22509	736	742	18256	1a	x	1a
205	GSSPFG00008115001-RA	GSSPFG00008115001-RA_1678-2422	scaffold_20102_22509	383	389	18289	8mer	x	8mer
206	GSSPFG00008116001-RA	GSSPFG00008116001-RA_4114-5530	scaffold_20102_22509	7	13	18299	1a	x	1a
207	GSSPFG00012033001-RA	GSSPFG00012033001-RA_123739-124479	scaffold_20102_22509	498	504	18395	m8	x	m8
208	GSSPFG00011778001-RA	GSSPFG00011778001-RA_3222-4065	scaffold_20102_22509	817	823	18653	m8	x	m8
209	GSSPFG00025659001-RA	GSSPFG00025659001-RA_12108-13567	scaffold_20102_22509	1368	1374	18729	m8	x	m8
210	GSSPFG00019069001-RA	GSSPFG00019069001-RA_6589-8153	scaffold_20102_22509	569	575	18826	m8	x	m8
211	GSSPFG00018058001-RA	GSSPFG00018058001-RA_646-1028	scaffold_20102_22509	233	239	19055	1a	x	1a
212	GSSPFG00024213001-RA	GSSPFG00024213001-RA_20059-21360	scaffold_20102_22509	1084	1090	19073	1a	x	1a
213	GSSPFG00005155001-RA	GSSPFG00005155001-RA_375-847	scaffold_20102_22509	249	255	19094	m8	x	m8
214	GSSPFG00025421001-RA	GSSPFG00025421001-RA_168609-169824	scaffold_20102_22509	455	461	19103	1a	x	1a
215	GSSPFG00010061001-RA	GSSPFG00010061001-RA_54774-55358	scaffold_20102_22509	565	571	19212	8mer	x	8mer
216	GSSPFG00000844001-RA	GSSPFG00000844001-RA_149860-150746	scaffold_20102_22509	578	584	19282	1a	x	1a
217	GSSPFG00028769001-RA	GSSPFG00028769001-RA_11979-12779	scaffold_20102_22509	373	379	19472	m8	x	m8
218	GSSPFG00028769001-RA	GSSPFG00028769001-RA_11979-12779	scaffold_20102_22509	95	101	19473	1a	x	1a
219	GSSPFG00027009001-RA	GSSPFG00027009001-RA_53252-54523	scaffold_20102_22509	1118	1124	19526	8mer	x	8mer
220	GSSPFG00027009001-RA	GSSPFG00027009001-RA_53252-54523	scaffold_20102_22509	95	101	19527	1a	x	1a
221	GSSPFG00015647001-RA	GSSPFG00015647001-RA_25104-26400	scaffold_20102_22509	1157	1163	19557	8mer	x	8mer
222	GSSPFG00010591001-RA	GSSPFG00010591001-RA_209-951	scaffold_20102_22509	376	382	19577	m8	x	m8
223	GSSPFG00011565001-RA	GSSPFG00011565001-RA_12424-13527	scaffold_20102_22509	121	127	19594	1a	x	1a
224	GSSPFG00028702001-RA	GSSPFG00028702001-RA_15118-16103	scaffold_20102_22509	412	418	19633	m8	x	m8
225	GSSPFG00004339001-RA	GSSPFG00004339001-RA_130474-130987	scaffold_20102_22509	317	323	19752	m8	x	m8
226	GSSPFG00019850001-RA	GSSPFG00019850001-RA_1365-1639	scaffold_20102_22509	123	129	19759	m8	x	m8
227	GSSPFG00010181001-RA	GSSPFG00010181001-RA_17700-19451	scaffold_20102_22509	554	560	19767	m8	x	m8
228	GSSPFG00027430001-RA	GSSPFG00027430001-RA_543-738	scaffold_20102_22509	136	142	19824	m8	x	m8
229	GSSPFG00028121001-RA	GSSPFG00028121001-RA_226-831	scaffold_20102_22509	136	142	20223	8mer	x	8mer
230	GSSPFG00005192001-RA	GSSPFG00005192001-RA_1336-2159	scaffold_20102_22509	210	216	20319	1a	x	1a
231	GSSPFG00005193001-RA	GSSPFG00005193001-RA_5017-6196	scaffold_20102_22509	301	307	20334	m8	x	m8
232	GSSPFG00005906001.3-RA	GSSPFG00005906001.3-RA_2096-5565	scaffold_20102_22509	1672	1678	20454	1a	x	1a
233	GSSPFG00026235001.3-RA	GSSPFG00026235001.3-RA_18010-20458	scaffold_20102_22509	2056	2062	20594	1a	x	1a
234	GSSPFG00029688001-RA	GSSPFG00029688001-RA_205-1107	scaffold_20102_22509	93	99	20681	m8	x	m8
235	GSSPFG00025882001-RA	GSSPFG00025882001-RA_20578-21334	scaffold_20102_22509	552	558	20732	m8	x	m8
236	GSSPFG00034350001-RA	GSSPFG00034350001-RA_8395-9403	scaffold_20102_22509	373	379	20856	1a	x	1a
237	GSSPFG00020924001.3-RA	GSSPFG00020924001.3-RA_2811-5231	scaffold_20102_22509	2057	2063	21026	1a	x	1a
238	GSSPFG00020928001-RA	GSSPFG00020928001-RA_10394-10855	scaffold_20102_22509	191	197	21122	1a	x	1a
239	GSSPFG00019478001-RA	GSSPFG00019478001-RA_8129-9222	scaffold_20102_22509	1088	1094	21132	1a	x	1a
240	GSSPFG00017226001-RA	GSSPFG00017226001-RA_8465-9203	scaffold_20102_22509	668	674	21209	1a	x	1a
241	GSSPFG00035978001.2-RA	GSSPFG00035978001.2-RA_133986-138635	scaffold_20102_22509	1681	1687	21231	8mer	x	8mer
242	GSSPFG00035978001.2-RA	GSSPFG00035978001.2-RA_133986-138635	scaffold_20102_22509	2634	2640	21232	1a	x	1a
243	GSSPFG00035978001.2-RA	GSSPFG00035978001.2-RA_133986-138635	scaffold_20102_22509	4441	4447	21233	m8	x	m8
244	GSSPFG00006655001-RA	GSSPFG00006655001-RA_14510-15883	scaffold_20102_22509	994	1000	21406	1a	x	1a
245	GSSPFG00010108001-RA	GSSPFG00010108001-RA_128236-129433	scaffold_20102_22509	1044	1050	21534	1a	x	1a
246	GSSPFG00010108001-RA	GSSPFG00010108001-RA_128236-129433	scaffold_20102_22509	659	665	21535	1a	x	1a
247	GSSPFG00002918001-RA	GSSPFG00002918001-RA_6307-7305	scaffold_20102_22509	89	95	21548	1a	x	1a
248	GSSPFG00006839001-RA	GSSPFG00006839001-RA_27347-28322	scaffold_20102_22509	248	254	21719	1a	x	1a
249	GSSPFG00006843001-RA	GSSPFG00006843001-RA_36159-37152	scaffold_20102_22509	543	549	21732	1a	x	1a
250	GSSPFG00015177001.3-RA	GSSPFG00015177001.3-RA_30490-31514	scaffold_20102_22509	164	170	21790	m8	x	m8
251	GSSPFG00015177001.3-RA	GSSPFG00015177001.3-RA_30490-31514	scaffold_20102_22509	741	747	21791	m8	x	m8
252	GSSPFG00001676001-RA	GSSPFG00001676001-RA_28884-29907	scaffold_20102_22509	841	847	21867	1a	x	1a
253	GSSPFG00007580001-RA	GSSPFG00007580001-RA_14138-14840	scaffold_20102_22509	140	146	22008	m8	x	m8
254	GSSPFG00019195001.3-RA	GSSPFG00019195001.3-RA_21348-22028	scaffold_20102_22509	236	242	22042	m8	x	m8
255	GSSPFG00030243001-RA	GSSPFG00030243001-RA_19795-20073	scaffold_20102_22509	192	198	22123	m8	x	m8
256	GSSPFG00017842001-RA	GSSPFG00017842001-RA_2213-3750	scaffold_20102_22509	501	507	22176	1a	x	1a
257	GSSPFG00009063001-RA	GSSPFG00009063001-RA_13013-14165	scaffold_20102_22509	472	478	22379	m8	x	m8
258	GSSPFG00030252001-RA	GSSPFG00030252001-RA_11768-13026	scaffold_20102_22509	160	166	22436	m8	x	m8
259	GSSPFG00001944001-RA	GSSPFG00001944001-RA_16863-17565	scaffold_20102_22509	579	585	22484	1a	x	1a
260	GSSPFG00031793001-RA	GSSPFG00031793001-RA_236445-237526	scaffold_20102_22509	1059	1065	22714	8mer	x	8mer
261	GSSPFG00026936001-RA	GSSPFG00026936001-RA_64584-65138	scaffold_20102_22509	155	161	22748	1a	x	1a
262	GSSPFG00014152001-RA	GSSPFG00014152001-RA_13071-14281	scaffold_20102_22509	854	860	22770	8mer	x	8mer
263	GSSPFG00014152001-RA	GSSPFG00014152001-RA_13071-14281	scaffold_20102_22509	886	892	22771	1a	x	1a
264	GSSPFG00008317001-RA	GSSPFG00008317001-RA_11476-12536	scaffold_20102_22509	289	295	22823	1a	x	1a
265	GSSPFG00011865001-RA	GSSPFG00011865001-RA_53638-54817	scaffold_20102_22509	719	725	23184	1a	x	1a
266	GSSPFG00012443001-RA	GSSPFG00012443001-RA_10366-11099	scaffold_20102_22509	486	492	23207	m8	x	m8
267	GSSPFG00013592001.3-RA	GSSPFG00013592001.3-RA_4493-5248	scaffold_20102_22509	124	130	23282	8mer	x	8mer
268	GSSPFG00013332001-RA	GSSPFG00013332001-RA_118187-119356	scaffold_20102_22509	77	83	23490	m8	x	m8
269	GSSPFG00032584001-RA	GSSPFG00032584001-RA_67640-69594	scaffold_20102_22509	956	962	23512	m8	x	m8
270	GSSPFG00015551001-RA	GSSPFG00015551001-RA_8504-9477	scaffold_20102_22509	140	146	23542	8mer	x	8mer
271	GSSPFG00035480001.3-RA	GSSPFG00035480001.3-RA_14236-14346	scaffold_20102_22509	1	7	23696	8mer	x	8mer
272	GSSPFG00010160001-RA	GSSPFG00010160001-RA_28735-29585	scaffold_20102_22509	286	292	23702	1a	x	1a
273	GSSPFG00012428001-RA	GSSPFG00012428001-RA_9721-10640	scaffold_20102_22509	757	763	23843	m8	x	m8
274	GSSPFG00017922001-RA	GSSPFG00017922001-RA_3248-3320	scaffold_20102_22509	45	51	23982	8mer	x	8mer
275	GSSPFG00017924001-RA	GSSPFG00017924001-RA_10069-11297	scaffold_20102_22509	139	145	23984	1a	x	1a
276	GSSPFG00033917001.2-RB	GSSPFG00033917001.2-RB_2067-2953	scaffold_20102_22509	54	60	24154	1a	x	1a
277	GSSPFG00026886001-RA	GSSPFG00026886001-RA_11642-12531	scaffold_20102_22509	745	751	24171	8mer	x	8mer
278	GSSPFG00027850001-RA	GSSPFG00027850001-RA_4685-6069	scaffold_20102_22509	1278	1284	24333	m8	x	m8
279	GSSPFG00027850001-RA	GSSPFG00027850001-RA_4685-6069	scaffold_20102_22509	666	672	24334	m8	x	m8
280	GSSPFG00019402001-RA	GSSPFG00019402001-RA_4713-5864	scaffold_20102_22509	343	349	24422	8mer	x	8mer
281	GSSPFG00003776001-RA	GSSPFG00003776001-RA_13509-14618	scaffold_20102_22509	725	731	24502	m8	x	m8
282	GSSPFG00007064001-RA	GSSPFG00007064001-RA_1990-3484	scaffold_20102_22509	491	497	24511	8mer	x	8mer
283	GSSPFG00024702001-RA	GSSPFG00024702001-RA_3855-4880	scaffold_20102_22509	86	92	24551	m8	x	m8
284	GSSPFG00030445001-RA	GSSPFG00030445001-RA_14962-16576	scaffold_20102_22509	1567	1573	24622	1a	x	1a
285	GSSPFG00028293001-RA	GSSPFG00028293001-RA_11124-12072	scaffold_20102_22509	358	364	24702	1a	x	1a
286	GSSPFG00000247001-RA	GSSPFG00000247001-RA_92649-93448	scaffold_20102_22509	684	690	24746	1a	x	1a
287	GSSPFG00003557001-RA	GSSPFG00003557001-RA_8792-10004	scaffold_20102_22509	421	427	24912	1a	x	1a
288	GSSPFG00025690001-RA	GSSPFG00025690001-RA_102648-103665	scaffold_20102_22509	603	609	24966	8mer	x	8mer
289	GSSPFG00024113001-RA	GSSPFG00024113001-RA_6554-7385	scaffold_20102_22509	104	110	25070	1a	x	1a
290	GSSPFG00016783001-RA	GSSPFG00016783001-RA_3229-4660	scaffold_20102_22509	962	968	25379	m8	x	m8
291	GSSPFG00025800001-RA	GSSPFG00025800001-RA_2234-3236	scaffold_20102_22509	469	475	25435	8mer	x	8mer
292	GSSPFG00025576001-RA	GSSPFG00025576001-RA_7818-8150	scaffold_20102_22509	160	166	25559	m8	x	m8
293	GSSPFG00023440001-RA	GSSPFG00023440001-RA_18023-19610	scaffold_20102_22509	951	957	25614	1a	x	1a
294	GSSPFG00008337001-RA	GSSPFG00008337001-RA_5446-6712	scaffold_20102_22509	960	966	25757	8mer	x	8mer
295	GSSPFG00032796001-RA	GSSPFG00032796001-RA_6448-7035	scaffold_20102_22509	522	528	25909	8mer	x	8mer
296	GSSPFG00019386001-RA	GSSPFG00019386001-RA_90444-91861	scaffold_20102_22509	1088	1094	26041	1a	x	1a
297	GSSPFG00015675001-RA	GSSPFG00015675001-RA_834-1729	scaffold_20102_22509	383	389	26222	1a	x	1a
298	GSSPFG00023370001-RA	GSSPFG00023370001-RA_4909-6092	scaffold_20102_22509	1056	1062	26296	8mer	x	8mer
299	GSSPFG00031837001-RA	GSSPFG00031837001-RA_64512-64604	scaffold_20102_22509	32	38	26433	8mer	x	8mer
300	GSSPFG00013230001-RA	GSSPFG00013230001-RA_3185-4052	scaffold_20102_22509	495	501	26646	8mer	x	8mer
301	GSSPFG00027732001-RA	GSSPFG00027732001-RA_102854-103992	scaffold_20102_22509	155	161	26932	8mer	x	8mer
302	GSSPFG00006774001-RA	GSSPFG00006774001-RA_4855-6255	scaffold_20102_22509	1017	1023	26942	1a	x	1a
303	GSSPFG00032005001-RA	GSSPFG00032005001-RA_1107-1835	scaffold_20102_22509	362	368	27129	1a	x	1a
304	GSSPFG00032005001-RA	GSSPFG00032005001-RA_1107-1835	scaffold_20102_22509	620	626	27130	1a	x	1a
305	GSSPFG00001403001-RA	GSSPFG00001403001-RA_6678-6979	scaffold_20102_22509	196	202	27176	m8	x	m8
306	GSSPFG00018340001.3-RA	GSSPFG00018340001.3-RA_7738-8824	scaffold_20102_22509	854	860	27286	1a	x	1a
307	GSSPFG00007383001-RA	GSSPFG00007383001-RA_11500-12560	scaffold_20102_22509	553	559	27413	1a	x	1a
308	GSSPFG00006825001-RA	GSSPFG00006825001-RA_101445-102163	scaffold_20102_22509	232	238	27438	1a	x	1a
309	GSSPFG00004487001-RA	GSSPFG00004487001-RA_8096-9416	scaffold_20102_22509	1095	1101	27654	m8	x	m8
310	GSSPFG00008775001-RA	GSSPFG00008775001-RA_8574-9965	scaffold_20102_22509	661	667	27801	1a	x	1a
311	GSSPFG00030288001-RA	GSSPFG00030288001-RA_5652-6726	scaffold_20102_22509	238	244	28058	1a	x	1a
312	GSSPFG00009287001-RA	GSSPFG00009287001-RA_69273-70359	scaffold_20102_22509	812	818	28072	1a	x	1a
313	GSSPFG00016887001-RA	GSSPFG00016887001-RA_7493-8013	scaffold_20102_22509	408	414	28139	8mer	x	8mer
314	GSSPFG00005224001-RA	GSSPFG00005224001-RA_75093-76256	scaffold_20102_22509	793	799	28211	1a	x	1a
315	GSSPFG00024749001-RA	GSSPFG00024749001-RA_9705-10905	scaffold_20102_22509	39	45	28252	1a	x	1a
316	GSSPFG00000521001-RA	GSSPFG00000521001-RA_94311-95161	scaffold_20102_22509	730	736	28342	1a	x	1a
317	GSSPFG00000079001-RA	GSSPFG00000079001-RA_6917-7918	scaffold_20102_22509	410	416	28379	1a	x	1a
318	GSSPFG00004698001-RA	GSSPFG00004698001-RA_11751-12150	scaffold_20102_22509	106	112	28528	1a	x	1a
319	GSSPFG00032371001-RA	GSSPFG00032371001-RA_10167-10846	scaffold_20102_22509	102	108	28541	1a	x	1a
320	GSSPFG00031635001-RA	GSSPFG00031635001-RA_429-912	scaffold_20102_22509	392	398	28583	m8	x	m8
321	GSSPFG00012791001-RA	GSSPFG00012791001-RA_14571-15460	scaffold_20102_22509	568	574	28665	8mer	x	8mer
322	GSSPFG00031664001-RA	GSSPFG00031664001-RA_61238-61674	scaffold_20102_22509	328	334	28686	m8	x	m8
323	GSSPFG00034067001-RA	GSSPFG00034067001-RA_55389-56701	scaffold_20102_22509	1081	1087	28867	m8	x	m8
324	GSSPFG00034067001-RA	GSSPFG00034067001-RA_55389-56701	scaffold_20102_22509	94	100	28868	m8	x	m8
325	GSSPFG00020847001.3-RA	GSSPFG00020847001.3-RA_8153-10467	scaffold_20102_22509	273	279	29010	8mer	x	8mer
326	GSSPFG00020847001.3-RA	GSSPFG00020847001.3-RA_8153-10467	scaffold_20102_22509	780	786	29011	1a	x	1a
327	GSSPFG00018736001-RA	GSSPFG00018736001-RA_6402-7475	scaffold_20102_22509	421	427	29053	m8	x	m8
328	GSSPFG00014819001-RA	GSSPFG00014819001-RA_4843-6201	scaffold_20102_22509	76	82	29063	m8	x	m8
329	GSSPFG00012762001-RA	GSSPFG00012762001-RA_8462-9013	scaffold_20102_22509	399	405	29163	8mer	x	8mer
330	GSSPFG00012762001-RA	GSSPFG00012762001-RA_8462-9013	scaffold_20102_22509	457	463	29164	m8	x	m8
331	GSSPFG00026290001-RA	GSSPFG00026290001-RA_98489-99684	scaffold_20102_22509	177	183	29201	m8	x	m8
332	GSSPFG00032134001-RA	GSSPFG00032134001-RA_5450-6777	scaffold_20102_22509	346	352	29282	1a	x	1a
333	GSSPFG00014204001-RA	GSSPFG00014204001-RA_2472-3059	scaffold_20102_22509	373	379	29328	8mer	x	8mer
334	GSSPFG00019160001-RA	GSSPFG00019160001-RA_10167-10231	scaffold_20102_22509	34	40	29357	m8	x	m8
335	GSSPFG00014794001-RA	GSSPFG00014794001-RA_2414-2979	scaffold_20102_22509	274	280	29405	1a	x	1a
336	GSSPFG00031730001-RA	GSSPFG00031730001-RA_5860-7855	scaffold_20102_22509	1911	1917	29452	m8	x	m8
337	GSSPFG00029963001-RA	GSSPFG00029963001-RA_4944-5026	scaffold_20102_22509	47	53	29693	8mer	x	8mer
338	GSSPFG00029963001-RA	GSSPFG00029963001-RA_4944-5026	scaffold_20102_22509	67	73	29694	8mer	x	8mer
339	GSSPFG00028295001-RA	GSSPFG00028295001-RA_2559-3471	scaffold_20102_22509	662	668	29810	m8	x	m8
340	GSSPFG00012996001-RA	GSSPFG00012996001-RA_42721-43791	scaffold_20102_22509	395	401	29953	8mer	x	8mer
341	GSSPFG00013180001-RA	GSSPFG00013180001-RA_2452-3228	scaffold_20102_22509	15	21	30321	m8	x	m8
342	GSSPFG00023936001-RA	GSSPFG00023936001-RA_1921-3147	scaffold_20102_22509	213	219	30520	1a	x	1a
343	GSSPFG00003472001-RA	GSSPFG00003472001-RA_1811-2723	scaffold_20102_22509	432	438	30533	m8	x	m8
344	GSSPFG00013278001-RA	GSSPFG00013278001-RA_4596-5909	scaffold_20102_22509	449	455	30579	m8	x	m8
345	GSSPFG00001154001-RA	GSSPFG00001154001-RA_9770-10618	scaffold_20102_22509	639	645	30604	m8	x	m8
346	GSSPFG00002117001-RA	GSSPFG00002117001-RA_1816-2775	scaffold_20102_22509	460	466	30625	1a	x	1a
347	GSSPFG00024821001-RA	GSSPFG00024821001-RA_7944-8795	scaffold_20102_22509	348	354	30638	m8	x	m8
348	GSSPFG00021258001-RA	GSSPFG00021258001-RA_66814-67691	scaffold_20102_22509	96	102	30701	8mer	x	8mer
349	GSSPFG00030146001-RA	GSSPFG00030146001-RA_8606-9362	scaffold_20102_22509	433	439	30719	m8	x	m8
350	GSSPFG00021871001-RA	GSSPFG00021871001-RA_7812-8855	scaffold_20102_22509	332	338	30743	m8	x	m8
351	GSSPFG00029714001-RA	GSSPFG00029714001-RA_1522-1799	scaffold_20102_22509	165	171	31059	1a	x	1a
352	GSSPFG00034466001-RA	GSSPFG00034466001-RA_1670-2874	scaffold_20102_22509	622	628	31171	1a	x	1a
353	GSSPFG00022524001.2-RA	GSSPFG00022524001.2-RA_6627-10125	scaffold_20102_22509	1383	1389	31210	1a	x	1a
354	GSSPFG00009051001-RA	GSSPFG00009051001-RA_9762-9953	scaffold_20102_22509	167	173	31326	8mer	x	8mer
355	GSSPFG00009653001-RA	GSSPFG00009653001-RA_3993-4851	scaffold_20102_22509	710	716	31584	1a	x	1a
356	GSSPFG00015651001-RA	GSSPFG00015651001-RA_1002-2169	scaffold_20102_22509	158	164	31654	m8	x	m8
357	GSSPFG00032879001-RA	GSSPFG00032879001-RA_9178-9663	scaffold_20102_22509	410	416	31692	1a	x	1a
358	GSSPFG00030689001-RA	GSSPFG00030689001-RA_7432-8579	scaffold_20102_22509	941	947	31730	1a	x	1a
359	GSSPFG00008424001-RA	GSSPFG00008424001-RA_566-1823	scaffold_20102_22509	523	529	31776	1a	x	1a
360	GSSPFG00029303001-RA	GSSPFG00029303001-RA_68335-69212	scaffold_20102_22509	299	305	31918	m8	x	m8
361	GSSPFG00028096001-RA	GSSPFG00028096001-RA_891-1222	scaffold_20102_22509	205	211	31934	m8	x	m8
362	GSSPFG00005455001-RA	GSSPFG00005455001-RA_26970-28237	scaffold_20102_22509	166	172	31945	m8	x	m8
363	GSSPFG00019925001-RA	GSSPFG00019925001-RA_7362-8357	scaffold_20102_22509	900	906	32119	1a	x	1a
364	GSSPFG00030588001-RA	GSSPFG00030588001-RA_38487-39869	scaffold_20102_22509	1301	1307	32139	8mer	x	8mer
365	GSSPFG00026030001-RA	GSSPFG00026030001-RA_22097-23048	scaffold_20102_22509	334	340	32191	1a	x	1a
366	GSSPFG00013509001.3-RA	GSSPFG00013509001.3-RA_158135-158781	scaffold_20102_22509	623	629	32222	m8	x	m8
367	GSSPFG00013465001-RA	GSSPFG00013465001-RA_84678-85631	scaffold_20102_22509	277	283	32325	8mer	x	8mer
368	GSSPFG00019399001.3-RA	GSSPFG00019399001.3-RA_97173-97768	scaffold_20102_22509	155	161	32536	1a	x	1a
369	GSSPFG00027087001-RA	GSSPFG00027087001-RA_41418-42342	scaffold_20102_22509	598	604	32575	m8	x	m8
370	GSSPFG00011988001-RA	GSSPFG00011988001-RA_12824-13928	scaffold_20102_22509	121	127	32642	m8	x	m8
371	GSSPFG00011988001-RA	GSSPFG00011988001-RA_12824-13928	scaffold_20102_22509	234	240	32643	1a	x	1a
372	GSSPFG00002515001.3-RA	GSSPFG00002515001.3-RA_20095-21295	scaffold_20102_22509	525	531	32726	m8	x	m8
373	GSSPFG00018644001-RA	GSSPFG00018644001-RA_128951-129343	scaffold_20102_22509	217	223	32784	8mer	x	8mer
374	GSSPFG00020032001-RA	GSSPFG00020032001-RA_286544-287364	scaffold_20102_22509	588	594	32960	1a	x	1a
375	GSSPFG00022660001-RA	GSSPFG00022660001-RA_29721-30913	scaffold_20102_22509	1031	1037	33052	1a	x	1a
376	GSSPFG00008451001-RA	GSSPFG00008451001-RA_68739-70510	scaffold_20102_22509	83	89	33102	1a	x	1a
377	GSSPFG00008448001-RA	GSSPFG00008448001-RA_78294-79035	scaffold_20102_22509	442	448	33117	8mer	x	8mer
378	GSSPFG00026920001-RA	GSSPFG00026920001-RA_18147-18550	scaffold_20102_22509	300	306	33162	m8	x	m8
379	GSSPFG00029050001-RA	GSSPFG00029050001-RA_98171-99119	scaffold_20102_22509	55	61	33232	1a	x	1a
380	GSSPFG00026079001-RA	GSSPFG00026079001-RA_10668-11785	scaffold_20102_22509	440	446	33520	1a	x	1a
381	GSSPFG00023650001-RA	GSSPFG00023650001-RA_35072-36320	scaffold_20102_22509	1173	1179	33738	1a	x	1a
382	GSSPFG00008788001-RA	GSSPFG00008788001-RA_4450-4823	scaffold_20102_22509	99	105	33868	8mer	x	8mer
383	GSSPFG00012734001-RA	GSSPFG00012734001-RA_328896-330437	scaffold_20102_22509	1196	1202	33938	8mer	x	8mer
384	GSSPFG00034195001-RA	GSSPFG00034195001-RA_130898-131506	scaffold_20102_22509	474	480	34098	8mer	x	8mer
385	GSSPFG00031518001-RA	GSSPFG00031518001-RA_86497-87521	scaffold_20102_22509	678	684	34362	m8	x	m8
386	GSSPFG00018401001.5-RA	GSSPFG00018401001.5-RA_205881-207247	scaffold_20102_22509	1322	1328	34446	1a	x	1a
387	GSSPFG00017486001-RA	GSSPFG00017486001-RA_257615-258420	scaffold_20102_22509	445	451	34550	1a	x	1a
388	GSSPFG00017486001-RA	GSSPFG00017486001-RA_257615-258420	scaffold_20102_22509	743	749	34551	m8	x	m8
389	GSSPFG00026652001-RA	GSSPFG00026652001-RA_66686-67137	scaffold_20102_22509	384	390	34918	1a	x	1a
390	GSSPFG00027132001-RA	GSSPFG00027132001-RA_8563-9942	scaffold_20102_22509	1081	1087	34944	1a	x	1a
391	GSSPFG00005742001-RA	GSSPFG00005742001-RA_15960-16192	scaffold_20102_22509	121	127	35057	m8	x	m8
392	GSSPFG00034667001-RA	GSSPFG00034667001-RA_639770-640914	scaffold_20102_22509	353	359	35068	m8	x	m8
393	GSSPFG00006657001.3-RA	GSSPFG00006657001.3-RA_731406-732688	scaffold_20102_22509	146	152	35213	1a	x	1a
394	GSSPFG00018580001.2-RA	GSSPFG00018580001.2-RA_54763-54998	scaffold_20102_22509	206	212	35503	1a	x	1a
395	GSSPFG00018580001.2-RA	GSSPFG00018580001.2-RA_54763-54998	scaffold_20102_22509	33	39	35504	m8	x	m8
396	GSSPFG00007812001-RA	GSSPFG00007812001-RA_195840-197154	scaffold_20102_22509	1105	1111	35571	8mer	x	8mer
397	GSSPFG00014525001-RA	GSSPFG00014525001-RA_61181-61470	scaffold_20102_22509	187	193	35720	8mer	x	8mer
398	GSSPFG00014524001-RA	GSSPFG00014524001-RA_62502-63639	scaffold_20102_22509	109	115	35729	m8	x	m8
399	GSSPFG00007821001-RA	GSSPFG00007821001-RA_117257-118164	scaffold_20102_22509	868	874	35833	1a	x	1a
400	GSSPFG00001791001-RA	GSSPFG00001791001-RA_36162-37286	scaffold_20102_22509	1039	1045	35950	1a	x	1a
401	GSSPFG00001791001-RA	GSSPFG00001791001-RA_36162-37286	scaffold_20102_22509	151	157	35951	m8	x	m8
402	GSSPFG00001802001-RA	GSSPFG00001802001-RA_230806-231317	scaffold_20102_22509	9	15	35972	8mer	x	8mer
403	GSSPFG00019840001-RA	GSSPFG00019840001-RA_4641-5540	scaffold_20102_22509	109	115	36103	8mer	x	8mer
404	GSSPFG00034651001.2-RA	GSSPFG00034651001.2-RA_740710-740947	scaffold_20102_22509	45	51	36135	m8	x	m8
405	GSSPFG00027816001-RA	GSSPFG00027816001-RA_135025-136319	scaffold_20102_22509	94	100	36232	m8	x	m8
406	GSSPFG00012395001-RA	GSSPFG00012395001-RA_172676-172815	scaffold_20102_22509	41	47	36412	8mer	x	8mer
407	GSSPFG00011709001-RA	GSSPFG00011709001-RA_272503-273775	scaffold_20102_22509	659	665	36447	1a	x	1a
408	GSSPFG00005171001-RA	GSSPFG00005171001-RA_197417-197916	scaffold_20102_22509	287	293	36459	1a	x	1a
409	GSSPFG00032704001-RA	GSSPFG00032704001-RA_78081-78620	scaffold_20102_22509	213	219	36565	1a	x	1a
410	GSSPFG00032704001-RA	GSSPFG00032704001-RA_78081-78620	scaffold_20102_22509	266	272	36566	m8	x	m8
411	GSSPFG00032177001.3-RA	GSSPFG00032177001.3-RA_124146-125908	scaffold_20102_22509	345	351	36582	m8	x	m8
412	GSSPFG00032177001.3-RC	GSSPFG00032177001.3-RC_124146-125908	scaffold_20102_22509	345	351	36603	m8	x	m8
413	GSSPFG00032177001.3-RD	GSSPFG00032177001.3-RD_124146-125908	scaffold_20102_22509	345	351	36624	m8	x	m8
414	GSSPFG00032177001.3-RB	GSSPFG00032177001.3-RB_124146-125908	scaffold_20102_22509	345	351	36648	m8	x	m8
415	GSSPFG00034063001-RA	GSSPFG00034063001-RA_131979-133108	scaffold_20102_22509	427	433	36771	1a	x	1a
416	GSSPFG00034064001-RA	GSSPFG00034064001-RA_138954-140039	scaffold_20102_22509	926	932	36797	8mer	x	8mer
417	GSSPFG00031352001-RA	GSSPFG00031352001-RA_137096-137365	scaffold_20102_22509	192	198	36997	1a	x	1a
418	GSSPFG00006490001-RA	GSSPFG00006490001-RA_16646-18001	scaffold_20102_22509	300	306	37048	1a	x	1a
419	GSSPFG00029683001-RA	GSSPFG00029683001-RA_47188-48396	scaffold_20102_22509	788	794	37139	m8	x	m8
420	GSSPFG00001349001-RA	GSSPFG00001349001-RA_13989-14421	scaffold_20102_22509	295	301	37157	8mer	x	8mer
421	GSSPFG00001346001-RA	GSSPFG00001346001-RA_26175-27249	scaffold_20102_22509	43	49	37172	8mer	x	8mer
422	GSSPFG00009761001-RA	GSSPFG00009761001-RA_10735-11696	scaffold_20102_22509	130	136	37430	m8	x	m8
423	GSSPFG00027841001-RA	GSSPFG00027841001-RA_11275-12700	scaffold_20102_22509	379	385	37525	m8	x	m8
424	GSSPFG00002429001-RA	GSSPFG00002429001-RA_227455-228620	scaffold_20102_22509	1109	1115	37579	1a	x	1a
425	GSSPFG00017613001.3-RA	GSSPFG00017613001.3-RA_4737-19168	scaffold_20102_22509	179	185	37707	m8	x	m8
426	GSSPFG00023268001-RA	GSSPFG00023268001-RA_64432-64997	scaffold_20102_22509	274	280	37723	1a	x	1a
427	GSSPFG00023265001-RA	GSSPFG00023265001-RA_81261-82324	scaffold_20102_22509	443	449	37743	m8	x	m8
428	GSSPFG00026815001-RA	GSSPFG00026815001-RA_24730-24783	scaffold_20102_22509	44	50	37864	m8	x	m8
429	GSSPFG00007100001-RA	GSSPFG00007100001-RA_254339-255003	scaffold_20102_22509	42	48	38185	8mer	x	8mer
430	GSSPFG00018241001-RA	GSSPFG00018241001-RA_207051-207362	scaffold_20102_22509	197	203	38240	1a	x	1a
431	GSSPFG00024952001-RA	GSSPFG00024952001-RA_148955-149844	scaffold_20102_22509	173	179	38248	m8	x	m8
432	GSSPFG00026685001-RA	GSSPFG00026685001-RA_21274-21543	scaffold_20102_22509	33	39	38660	m8	x	m8
433	GSSPFG00013224001-RA	GSSPFG00013224001-RA_27043-27536	scaffold_20102_22509	50	56	38787	8mer	x	8mer
434	GSSPFG00015425001-RA	GSSPFG00015425001-RA_67159-68564	scaffold_20102_22509	1196	1202	38968	1a	x	1a
435	GSSPFG00030638001-RA	GSSPFG00030638001-RA_257784-258412	scaffold_20102_22509	599	605	39042	8mer	x	8mer
436	GSSPFG00030639001-RA	GSSPFG00030639001-RA_274092-274867	scaffold_20102_22509	113	119	39052	m8	x	m8
437	GSSPFG00015318001-RA	GSSPFG00015318001-RA_40155-41112	scaffold_20102_22509	574	580	39186	m8	x	m8
438	GSSPFG00030459001.3-RA	GSSPFG00030459001.3-RA_14505-15156	scaffold_20102_22509	372	378	39332	m8	x	m8
439	GSSPFG00006199001-RA	GSSPFG00006199001-RA_36614-37073	scaffold_20102_22509	254	260	39433	8mer	x	8mer
440	GSSPFG00033401001-RA	GSSPFG00033401001-RA_39934-41182	scaffold_20102_22509	255	261	39480	1a	x	1a
441	GSSPFG00033401001-RA	GSSPFG00033401001-RA_39934-41182	scaffold_20102_22509	297	303	39481	m8	x	m8
442	GSSPFG00013619001-RA	GSSPFG00013619001-RA_26787-27210	scaffold_20102_22509	103	109	39845	1a	x	1a
443	GSSPFG00013617001-RA	GSSPFG00013617001-RA_43505-44726	scaffold_20102_22509	1183	1189	39849	1a	x	1a
444	GSSPFG00024202001.3-RA	GSSPFG00024202001.3-RA_13841-15003	scaffold_20102_22509	615	621	39918	8mer	x	8mer
445	GSSPFG00024202001.3-RA	GSSPFG00024202001.3-RA_13841-15003	scaffold_20102_22509	686	692	39919	m8	x	m8
446	GSSPFG00024202001.3-RA	GSSPFG00024202001.3-RA_13841-15003	scaffold_20102_22509	879	885	39920	8mer	x	8mer
447	GSSPFG00028858001-RA	GSSPFG00028858001-RA_23559-24750	scaffold_20102_22509	962	968	40099	1a	x	1a
448	GSSPFG00003373001.3-RA	GSSPFG00003373001.3-RA_35926-36277	scaffold_20102_22509	301	307	40146	8mer	x	8mer
449	GSSPFG00000598001-RA	GSSPFG00000598001-RA_14305-14720	scaffold_20102_22509	330	336	40375	1a	x	1a
450	GSSPFG00029362001-RA	GSSPFG00029362001-RA_21376-22700	scaffold_20102_22509	319	325	40464	8mer	x	8mer
451	GSSPFG00008661001-RA	GSSPFG00008661001-RA_14713-15086	scaffold_20102_22509	318	324	40496	m8	x	m8
452	GSSPFG00004388001-RA	GSSPFG00004388001-RA_161019-161789	scaffold_20102_22509	145	151	40619	1a	x	1a
453	GSSPFG00030721001-RA	GSSPFG00030721001-RA_42084-43430	scaffold_20102_22509	229	235	40653	1a	x	1a
454	GSSPFG00004988001-RA	GSSPFG00004988001-RA_1358-2468	scaffold_20102_22509	448	454	40760	m8	x	m8
455	GSSPFG00016302001-RA	GSSPFG00016302001-RA_10216-10595	scaffold_20102_22509	122	128	40828	m8	x	m8
456	GSSPFG00017669001-RA	GSSPFG00017669001-RA_119580-120535	scaffold_20102_22509	259	265	40835	m8	x	m8
457	GSSPFG00026134001-RA	GSSPFG00026134001-RA_15654-17626	scaffold_20102_22509	752	758	40861	1a	x	1a
458	GSSPFG00017691001-RA	GSSPFG00017691001-RA_81465-82137	scaffold_20102_22509	575	581	40937	8mer	x	8mer
459	GSSPFG00011947001-RA	GSSPFG00011947001-RA_14285-14907	scaffold_20102_22509	216	222	40982	1a	x	1a
460	GSSPFG00010242001.2-RA	GSSPFG00010242001.2-RA_98560-98868	scaffold_20102_22509	253	259	41058	m8	x	m8
461	GSSPFG00007997001.3-RA	GSSPFG00007997001.3-RA_329707-333496	scaffold_20102_22509	347	353	41276	1a	x	1a
462	GSSPFG00012556001-RA	GSSPFG00012556001-RA_264857-266002	scaffold_20102_22509	223	229	41295	8mer	x	8mer
463	GSSPFG00012558001-RA	GSSPFG00012558001-RA_269672-270817	scaffold_20102_22509	223	229	41309	8mer	x	8mer
464	GSSPFG00003972001-RA	GSSPFG00003972001-RA_65209-66364	scaffold_20102_22509	342	348	41349	1a	x	1a
465	GSSPFG00003974001-RA	GSSPFG00003974001-RA_84672-86393	scaffold_20102_22509	240	246	41367	m8	x	m8
466	GSSPFG00024381001-RA	GSSPFG00024381001-RA_67173-67287	scaffold_20102_22509	101	107	41534	m8	x	m8
467	GSSPFG00031692001-RA	GSSPFG00031692001-RA_106208-107726	scaffold_20102_22509	585	591	41704	m8	x	m8
468	GSSPFG00031691001-RA	GSSPFG00031691001-RA_111691-112996	scaffold_20102_22509	713	719	41730	1a	x	1a
469	GSSPFG00006241001.2-RA	GSSPFG00006241001.2-RA_181764-185672	scaffold_20102_22509	1708	1714	41782	8mer	x	8mer
470	GSSPFG00006241001.2-RA	GSSPFG00006241001.2-RA_181764-185672	scaffold_20102_22509	193	199	41783	m8	x	m8
471	GSSPFG00006241001.2-RB	GSSPFG00006241001.2-RB_181764-185672	scaffold_20102_22509	1708	1714	41837	8mer	x	8mer
472	GSSPFG00006241001.2-RB	GSSPFG00006241001.2-RB_181764-185672	scaffold_20102_22509	193	199	41838	m8	x	m8
473	GSSPFG00006918001.3-RA	GSSPFG00006918001.3-RA_10417-11265	scaffold_20102_22509	697	703	41884	1a	x	1a
474	GSSPFG00034486001-RA	GSSPFG00034486001-RA_536351-537326	scaffold_20102_22509	781	787	41922	m8	x	m8
475	GSSPFG00011921001-RA	GSSPFG00011921001-RA_4548-5721	scaffold_20102_22509	509	515	41966	1a	x	1a
476	GSSPFG00016808001-RA	GSSPFG00016808001-RA_1794-2849	scaffold_20102_22509	509	515	41982	m8	x	m8
477	GSSPFG00028144001-RA	GSSPFG00028144001-RA_102640-103995	scaffold_20102_22509	580	586	42003	m8	x	m8
478	GSSPFG00001626001-RA	GSSPFG00001626001-RA_28893-29312	scaffold_20102_22509	193	199	42028	1a	x	1a
479	GSSPFG00001628001-RA	GSSPFG00001628001-RA_35187-36408	scaffold_20102_22509	791	797	42034	m8	x	m8
miR1a_5p
Row	Gene_ID
1	GSSPFG00014404001.3-RA	GSSPFG00014404001.3-RA_63815-64791	scaffold_9429_17752	204	210	73	m8	x	m8
2	GSSPFG00014404001.3-RA	GSSPFG00014404001.3-RA_63815-64791	scaffold_9429_17752	506	512	74	1a	x	1a
3	GSSPFG00009341001-RA	GSSPFG00009341001-RA_124158-125318	scaffold_9429_17752	460	466	95	m8	x	m8
4	GSSPFG00031627001-RA	GSSPFG00031627001-RA_1898-2962	scaffold_9429_17752	449	455	367	8mer	x	8mer
5	GSSPFG00001328001-RA	GSSPFG00001328001-RA_5774-6338	scaffold_9429_17752	311	317	390	m8	x	m8
6	GSSPFG00003705001-RA	GSSPFG00003705001-RA_9373-10016	scaffold_9429_17752	9	15	408	8mer	x	8mer
7	GSSPFG00009095001-RA	GSSPFG00009095001-RA_37619-38789	scaffold_9429_17752	912	918	484	8mer	x	8mer
8	GSSPFG00007078001-RA	GSSPFG00007078001-RA_1032-2184	scaffold_9429_17752	41	47	565	m8	x	m8
9	GSSPFG00029515001-RA	GSSPFG00029515001-RA_209678-210916	scaffold_9429_17752	921	927	613	1a	x	1a
10	GSSPFG00027599001-RA	GSSPFG00027599001-RA_7733-7855	scaffold_9429_17752	83	89	700	1a	x	1a
11	GSSPFG00018162001-RA	GSSPFG00018162001-RA_3811-4567	scaffold_9429_17752	592	598	704	m8	x	m8
12	GSSPFG00026778001-RA	GSSPFG00026778001-RA_140084-140696	scaffold_9429_17752	486	492	965	1a	x	1a
13	GSSPFG00013212001.3-RA	GSSPFG00013212001.3-RA_17627-18540	scaffold_9429_17752	673	679	1035	m8	x	m8
14	GSSPFG00013212001.3-RA	GSSPFG00013212001.3-RA_17627-18540	scaffold_9429_17752	854	860	1036	8mer	x	8mer
15	GSSPFG00025391001-RA	GSSPFG00025391001-RA_59783-61058	scaffold_9429_17752	856	862	1076	1a	x	1a
16	GSSPFG00011175001-RA	GSSPFG00011175001-RA_4449-5569	scaffold_9429_17752	861	867	1232	m8	x	m8
17	GSSPFG00021231001-RA	GSSPFG00021231001-RA_3385-4526	scaffold_9429_17752	233	239	1295	1a	x	1a
18	GSSPFG00033391001-RA	GSSPFG00033391001-RA_37042-37532	scaffold_9429_17752	12	18	1303	8mer	x	8mer
19	GSSPFG00030084001-RA	GSSPFG00030084001-RA_3425-3751	scaffold_9429_17752	189	195	1319	m8	x	m8
20	GSSPFG00015558001-RA	GSSPFG00015558001-RA_2989-4538	scaffold_9429_17752	1342	1348	1352	m8	x	m8
21	GSSPFG00015558001-RA	GSSPFG00015558001-RA_2989-4538	scaffold_9429_17752	196	202	1353	1a	x	1a
22	GSSPFG00017758001-RA	GSSPFG00017758001-RA_8266-8870	scaffold_9429_17752	300	306	1486	1a	x	1a
23	GSSPFG00019044001-RA	GSSPFG00019044001-RA_208-1436	scaffold_9429_17752	597	603	1708	1a	x	1a
24	GSSPFG00006731001-RA	GSSPFG00006731001-RA_8065-8955	scaffold_9429_17752	76	82	1722	1a	x	1a
25	GSSPFG00003959001-RA	GSSPFG00003959001-RA_61105-61888	scaffold_9429_17752	204	210	1770	m8	x	m8
26	GSSPFG00007971001-RA	GSSPFG00007971001-RA_4193-5197	scaffold_9429_17752	228	234	1879	m8	x	m8
27	GSSPFG00025313001-RA	GSSPFG00025313001-RA_197914-198668	scaffold_9429_17752	562	568	1989	1a	x	1a
28	GSSPFG00031182001-RA	GSSPFG00031182001-RA_861-1857	scaffold_9429_17752	661	667	2024	8mer	x	8mer
29	GSSPFG00016813001-RA	GSSPFG00016813001-RA_6002-6903	scaffold_9429_17752	442	448	2088	8mer	x	8mer
30	GSSPFG00011598001-RA	GSSPFG00011598001-RA_69565-70002	scaffold_9429_17752	270	276	2549	m8	x	m8
31	GSSPFG00032380001-RA	GSSPFG00032380001-RA_6894-7183	scaffold_9429_17752	145	151	2618	1a	x	1a
32	GSSPFG00003064001.2-RA	GSSPFG00003064001.2-RA_66234-66712	scaffold_9429_17752	87	93	2645	1a	x	1a
33	GSSPFG00013790001-RA	GSSPFG00013790001-RA_58099-59464	scaffold_9429_17752	1028	1034	2682	1a	x	1a
34	GSSPFG00013790001-RA	GSSPFG00013790001-RA_58099-59464	scaffold_9429_17752	634	640	2683	1a	x	1a
35	GSSPFG00017947001-RA	GSSPFG00017947001-RA_7299-8741	scaffold_9429_17752	589	595	2776	1a	x	1a
36	GSSPFG00000707001-RA	GSSPFG00000707001-RA_43381-43405	scaffold_9429_17752	4	10	2801	1a	x	1a
37	GSSPFG00014480001-RA	GSSPFG00014480001-RA_4420-5729	scaffold_9429_17752	298	304	2826	8mer	x	8mer
38	GSSPFG00020967001-RA	GSSPFG00020967001-RA_1522-2142	scaffold_9429_17752	365	371	2862	1a	x	1a
39	GSSPFG00014707001-RA	GSSPFG00014707001-RA_46586-46896	scaffold_9429_17752	169	175	3030	m8	x	m8
40	GSSPFG00014708001-RA	GSSPFG00014708001-RA_53958-54984	scaffold_9429_17752	169	175	3049	m8	x	m8
41	GSSPFG00014708001-RA	GSSPFG00014708001-RA_53958-54984	scaffold_9429_17752	995	1001	3050	m8	x	m8
42	GSSPFG00027683001-RA	GSSPFG00027683001-RA_6738-7237	scaffold_9429_17752	130	136	3126	8mer	x	8mer
43	GSSPFG00027690001-RA	GSSPFG00027690001-RA_36494-37547	scaffold_9429_17752	375	381	3141	1a	x	1a
44	GSSPFG00030772001-RA	GSSPFG00030772001-RA_150019-151475	scaffold_9429_17752	338	344	3317	m8	x	m8
45	GSSPFG00009019001-RA	GSSPFG00009019001-RA_6190-7741	scaffold_9429_17752	1325	1331	3396	1a	x	1a
46	GSSPFG00009019001-RA	GSSPFG00009019001-RA_6190-7741	scaffold_9429_17752	1482	1488	3397	m8	x	m8
47	GSSPFG00014508001-RA	GSSPFG00014508001-RA_3671-4576	scaffold_9429_17752	645	651	3538	m8	x	m8
48	GSSPFG00008521001-RA	GSSPFG00008521001-RA_5358-6824	scaffold_9429_17752	582	588	3720	m8	x	m8
49	GSSPFG00015589001-RA	GSSPFG00015589001-RA_6342-7756	scaffold_9429_17752	181	187	3744	8mer	x	8mer
50	GSSPFG00013202001-RA	GSSPFG00013202001-RA_1938-2949	scaffold_9429_17752	360	366	3782	1a	x	1a
51	GSSPFG00019826001-RA	GSSPFG00019826001-RA_26391-27226	scaffold_9429_17752	802	808	3860	m8	x	m8
52	GSSPFG00024975001-RA	GSSPFG00024975001-RA_5463-6252	scaffold_9429_17752	317	323	3927	m8	x	m8
53	GSSPFG00024975001-RA	GSSPFG00024975001-RA_5463-6252	scaffold_9429_17752	393	399	3928	8mer	x	8mer
54	GSSPFG00024975001-RA	GSSPFG00024975001-RA_5463-6252	scaffold_9429_17752	591	597	3929	8mer	x	8mer
55	GSSPFG00032339001-RA	GSSPFG00032339001-RA_6292-6900	scaffold_9429_17752	354	360	4004	m8	x	m8
56	GSSPFG00024643001-RA	GSSPFG00024643001-RA_6332-7710	scaffold_9429_17752	1091	1097	4086	1a	x	1a
57	GSSPFG00024643001-RA	GSSPFG00024643001-RA_6332-7710	scaffold_9429_17752	196	202	4087	8mer	x	8mer
58	GSSPFG00017629001-RA	GSSPFG00017629001-RA_3545-4668	scaffold_9429_17752	896	902	4109	1a	x	1a
59	GSSPFG00015149001-RA	GSSPFG00015149001-RA_5242-5795	scaffold_9429_17752	377	383	4313	m8	x	m8
60	GSSPFG00005124001-RA	GSSPFG00005124001-RA_3753-4723	scaffold_9429_17752	835	841	4327	8mer	x	8mer
61	GSSPFG00013968001-RA	GSSPFG00013968001-RA_6815-7342	scaffold_9429_17752	80	86	4763	1a	x	1a
62	GSSPFG00003140001-RA	GSSPFG00003140001-RA_268560-269424	scaffold_9429_17752	68	74	4792	m8	x	m8
63	GSSPFG00007720001-RA	GSSPFG00007720001-RA_1160-2183	scaffold_9429_17752	961	967	4943	m8	x	m8
64	GSSPFG00017310001-RA	GSSPFG00017310001-RA_2505-3991	scaffold_9429_17752	764	770	4978	1a	x	1a
65	GSSPFG00013406001-RA	GSSPFG00013406001-RA_58577-59589	scaffold_9429_17752	515	521	5095	m8	x	m8
66	GSSPFG00013406001-RA	GSSPFG00013406001-RA_58577-59589	scaffold_9429_17752	711	717	5096	8mer	x	8mer
67	GSSPFG00002187001-RA	GSSPFG00002187001-RA_1215-2378	scaffold_9429_17752	447	453	5112	m8	x	m8
68	GSSPFG00002187001-RA	GSSPFG00002187001-RA_1215-2378	scaffold_9429_17752	551	557	5113	1a	x	1a
69	GSSPFG00002187001-RA	GSSPFG00002187001-RA_1215-2378	scaffold_9429_17752	612	618	5114	m8	x	m8
70	GSSPFG00010214001-RA	GSSPFG00010214001-RA_3186-3740	scaffold_9429_17752	321	327	5127	m8	x	m8
71	GSSPFG00029840001-RA	GSSPFG00029840001-RA_5523-6460	scaffold_9429_17752	446	452	5177	1a	x	1a
72	GSSPFG00034159001.3-RA	GSSPFG00034159001.3-RA_3020-4108	scaffold_9429_17752	260	266	5217	m8	x	m8
73	GSSPFG00026864001-RA	GSSPFG00026864001-RA_4102-4432	scaffold_9429_17752	230	236	5229	m8	x	m8
74	GSSPFG00018317001-RA	GSSPFG00018317001-RA_3228-4573	scaffold_9429_17752	1185	1191	5283	m8	x	m8
75	GSSPFG00026992001-RA	GSSPFG00026992001-RA_59510-60019	scaffold_9429_17752	45	51	5518	m8	x	m8
76	GSSPFG00012658001-RA	GSSPFG00012658001-RA_2128-2595	scaffold_9429_17752	236	242	5526	1a	x	1a
77	GSSPFG00018520001-RA	GSSPFG00018520001-RA_2087-2986	scaffold_9429_17752	209	215	5547	m8	x	m8
78	GSSPFG00020377001-RA	GSSPFG00020377001-RA_4249-5538	scaffold_9429_17752	56	62	5614	1a	x	1a
79	GSSPFG00008496001-RA	GSSPFG00008496001-RA_4425-6428	scaffold_9429_17752	871	877	5742	8mer	x	8mer
80	GSSPFG00012139001-RA	GSSPFG00012139001-RA_213-1423	scaffold_9429_17752	558	564	5799	8mer	x	8mer
81	GSSPFG00015260001-RA	GSSPFG00015260001-RA_378-921	scaffold_9429_17752	301	307	5811	1a	x	1a
82	GSSPFG00017200001-RA	GSSPFG00017200001-RA_5394-6566	scaffold_9429_17752	558	564	6009	m8	x	m8
83	GSSPFG00005015001-RA	GSSPFG00005015001-RA_5423-6423	scaffold_9429_17752	981	987	6071	m8	x	m8
84	GSSPFG00012418001-RA	GSSPFG00012418001-RA_3769-4276	scaffold_9429_17752	148	154	6310	8mer	x	8mer
85	GSSPFG00026017001-RA	GSSPFG00026017001-RA_123292-124012	scaffold_9429_17752	541	547	6497	m8	x	m8
86	GSSPFG00003907001.3-RA	GSSPFG00003907001.3-RA_55057-55927	scaffold_9429_17752	475	481	6515	8mer	x	8mer
87	GSSPFG00013034001.3-RA	GSSPFG00013034001.3-RA_3203-4847	scaffold_9429_17752	22	28	6567	8mer	x	8mer
88	GSSPFG00025825001-RA	GSSPFG00025825001-RA_33447-34938	scaffold_9429_17752	1321	1327	6606	1a	x	1a
89	GSSPFG00033327001-RA	GSSPFG00033327001-RA_2971-4387	scaffold_9429_17752	895	901	6632	m8	x	m8
90	GSSPFG00029091001-RA	GSSPFG00029091001-RA_66529-67416	scaffold_9429_17752	243	249	6667	1a	x	1a
91	GSSPFG00020366001-RA	GSSPFG00020366001-RA_35224-36613	scaffold_9429_17752	316	322	6687	1a	x	1a
92	GSSPFG00006149001-RA	GSSPFG00006149001-RA_265039-266107	scaffold_9429_17752	460	466	6758	1a	x	1a
93	GSSPFG00000284001-RA	GSSPFG00000284001-RA_1715-3090	scaffold_9429_17752	821	827	6798	1a	x	1a
94	GSSPFG00027440001.2-RA	GSSPFG00027440001.2-RA_17-252	scaffold_9429_17752	184	190	6806	1a	x	1a
95	GSSPFG00030897001-RA	GSSPFG00030897001-RA_16678-16984	scaffold_9429_17752	135	141	6809	m8	x	m8
96	GSSPFG00016959001-RA	GSSPFG00016959001-RA_297-1238	scaffold_9429_17752	553	559	6827	1a	x	1a
97	GSSPFG00019409001-RA	GSSPFG00019409001-RA_253-1130	scaffold_9429_17752	417	423	6918	m8	x	m8
98	GSSPFG00006613001-RA	GSSPFG00006613001-RA_4227-5611	scaffold_9429_17752	775	781	6996	m8	x	m8
99	GSSPFG00016043001-RA	GSSPFG00016043001-RA_4710-6128	scaffold_9429_17752	300	306	7034	8mer	x	8mer
100	GSSPFG00022344001-RA	GSSPFG00022344001-RA_45221-46621	scaffold_9429_17752	1324	1330	7066	8mer	x	8mer
101	GSSPFG00016958001-RA	GSSPFG00016958001-RA_1138-1619	scaffold_9429_17752	172	178	7172	1a	x	1a
102	GSSPFG00016958001-RA	GSSPFG00016958001-RA_1138-1619	scaffold_9429_17752	211	217	7173	8mer	x	8mer
103	GSSPFG00016958001-RA	GSSPFG00016958001-RA_1138-1619	scaffold_9429_17752	4	10	7174	1a	x	1a
104	GSSPFG00017025001-RA	GSSPFG00017025001-RA_3632-4369	scaffold_9429_17752	620	626	7236	8mer	x	8mer
105	GSSPFG00031548001-RA	GSSPFG00031548001-RA_188287-188988	scaffold_9429_17752	27	33	7289	8mer	x	8mer
106	GSSPFG00023481001-RA	GSSPFG00023481001-RA_54515-55560	scaffold_9429_17752	668	674	7426	m8	x	m8
107	GSSPFG00026121001-RA	GSSPFG00026121001-RA_15503-16425	scaffold_9429_17752	4	10	7468	m8	x	m8
108	GSSPFG00009094001-RA	GSSPFG00009094001-RA_23776-23871	scaffold_9429_17752	1	7	7560	m8	x	m8
109	GSSPFG00015438001-RA	GSSPFG00015438001-RA_4207-5019	scaffold_9429_17752	172	178	7564	1a	x	1a
110	GSSPFG00022581001-RA	GSSPFG00022581001-RA_1934-2676	scaffold_9429_17752	540	546	7572	1a	x	1a
111	GSSPFG00033499001-RA	GSSPFG00033499001-RA_3934-5241	scaffold_9429_17752	1173	1179	7685	m8	x	m8
112	GSSPFG00001429001-RA	GSSPFG00001429001-RA_1247-2720	scaffold_9429_17752	951	957	7694	m8	x	m8
113	GSSPFG00015745001-RA	GSSPFG00015745001-RA_1848-2898	scaffold_9429_17752	833	839	7761	8mer	x	8mer
114	GSSPFG00007837001-RA	GSSPFG00007837001-RA_4180-4993	scaffold_9429_17752	17	23	7826	1a	x	1a
115	GSSPFG00033436001-RA	GSSPFG00033436001-RA_105-182	scaffold_9429_17752	38	44	7857	8mer	x	8mer
116	GSSPFG00031804001-RA	GSSPFG00031804001-RA_60665-61470	scaffold_9429_17752	419	425	7930	1a	x	1a
117	GSSPFG00002981001-RA	GSSPFG00002981001-RA_3739-5069	scaffold_9429_17752	262	268	7978	8mer	x	8mer
118	GSSPFG00025746001-RA	GSSPFG00025746001-RA_3139-4168	scaffold_9429_17752	119	125	8037	m8	x	m8
119	GSSPFG00016295001-RA	GSSPFG00016295001-RA_166818-168527	scaffold_9429_17752	345	351	8228	8mer	x	8mer
120	GSSPFG00013339001-RA	GSSPFG00013339001-RA_3217-3776	scaffold_9429_17752	98	104	8324	1a	x	1a
121	GSSPFG00007694001-RA	GSSPFG00007694001-RA_25030-26324	scaffold_9429_17752	246	252	8503	m8	x	m8
122	GSSPFG00028498001-RA	GSSPFG00028498001-RA_187380-188475	scaffold_9429_17752	896	902	8524	m8	x	m8
123	GSSPFG00008488001.3-RA	GSSPFG00008488001.3-RA_403-1649	scaffold_9429_17752	1105	1111	8843	1a	x	1a
124	GSSPFG00000748001-RA	GSSPFG00000748001-RA_197-816	scaffold_9429_17752	387	393	8864	1a	x	1a
125	GSSPFG00018195001-RA	GSSPFG00018195001-RA_2040-3298	scaffold_9429_17752	973	979	8909	m8	x	m8
126	GSSPFG00002840001-RA	GSSPFG00002840001-RA_1787-3052	scaffold_9429_17752	243	249	8950	m8	x	m8
127	GSSPFG00008583001-RA	GSSPFG00008583001-RA_1909-2103	scaffold_9429_17752	93	99	9145	1a	x	1a
128	GSSPFG00010440001-RA	GSSPFG00010440001-RA_1403-2828	scaffold_9429_17752	1347	1353	9233	1a	x	1a
129	GSSPFG00005568001-RA	GSSPFG00005568001-RA_43353-44470	scaffold_9429_17752	318	324	9266	8mer	x	8mer
130	GSSPFG00014853001-RA	GSSPFG00014853001-RA_3368-4583	scaffold_9429_17752	1074	1080	9367	m8	x	m8
131	GSSPFG00025732001-RA	GSSPFG00025732001-RA_1617-1730	scaffold_9429_17752	86	92	9417	m8	x	m8
132	GSSPFG00006191001-RA	GSSPFG00006191001-RA_3710-4812	scaffold_9429_17752	397	403	9629	m8	x	m8
133	GSSPFG00006755001-RA	GSSPFG00006755001-RA_949-2337	scaffold_9429_17752	683	689	9679	m8	x	m8
134	GSSPFG00017931001-RA	GSSPFG00017931001-RA_29926-30936	scaffold_9429_17752	802	808	9783	m8	x	m8
135	GSSPFG00020153001-RA	GSSPFG00020153001-RA_12390-12861	scaffold_9429_17752	314	320	9825	1a	x	1a
136	GSSPFG00021523001-RA	GSSPFG00021523001-RA_52525-53013	scaffold_9429_17752	354	360	9885	8mer	x	8mer
137	GSSPFG00005991001-RA	GSSPFG00005991001-RA_50322-51658	scaffold_9429_17752	913	919	10189	8mer	x	8mer
138	GSSPFG00028953001-RA	GSSPFG00028953001-RA_204134-205181	scaffold_9429_17752	12	18	10337	1a	x	1a
139	GSSPFG00033431001-RA	GSSPFG00033431001-RA_21283-22194	scaffold_9429_17752	17	23	10824	m8	x	m8
140	GSSPFG00016554001.3-RA	GSSPFG00016554001.3-RA_51801-53363	scaffold_9429_17752	1342	1348	10915	8mer	x	8mer
141	GSSPFG00016554001.3-RA	GSSPFG00016554001.3-RA_51801-53363	scaffold_9429_17752	514	520	10916	1a	x	1a
142	GSSPFG00009325001-RA	GSSPFG00009325001-RA_46311-46923	scaffold_9429_17752	222	228	11076	1a	x	1a
143	GSSPFG00021658001-RA	GSSPFG00021658001-RA_8683-10137	scaffold_9429_17752	607	613	11144	8mer	x	8mer
144	GSSPFG00023105001-RA	GSSPFG00023105001-RA_2550-2571	scaffold_9429_17752	14	20	11250	1a	x	1a
145	GSSPFG00002357001-RA	GSSPFG00002357001-RA_22829-23997	scaffold_9429_17752	1054	1060	11272	8mer	x	8mer
146	GSSPFG00018032001-RA	GSSPFG00018032001-RA_170399-171342	scaffold_9429_17752	778	784	11330	1a	x	1a
147	GSSPFG00023669001.3-RA	GSSPFG00023669001.3-RA_45360-46304	scaffold_9429_17752	503	509	11549	1a	x	1a
148	GSSPFG00025780001-RA	GSSPFG00025780001-RA_38945-40049	scaffold_9429_17752	1061	1067	11588	8mer	x	8mer
149	GSSPFG00015981001-RA	GSSPFG00015981001-RA_48976-49987	scaffold_9429_17752	786	792	11899	8mer	x	8mer
150	GSSPFG00015981001-RA	GSSPFG00015981001-RA_48976-49987	scaffold_9429_17752	802	808	11900	1a	x	1a
151	GSSPFG00010709001.3-RA	GSSPFG00010709001.3-RA_2398-4124	scaffold_9429_17752	730	736	11959	1a	x	1a
152	GSSPFG00006393001-RA	GSSPFG00006393001-RA_36565-37292	scaffold_9429_17752	444	450	12060	m8	x	m8
153	GSSPFG00023968001.3-RA	GSSPFG00023968001.3-RA_340-1692	scaffold_9429_17752	934	940	12098	m8	x	m8
154	GSSPFG00031488001-RA	GSSPFG00031488001-RA_2542-3477	scaffold_9429_17752	487	493	12248	8mer	x	8mer
155	GSSPFG00005521001-RA	GSSPFG00005521001-RA_2199-2780	scaffold_9429_17752	156	162	12314	m8	x	m8
156	GSSPFG00017368001-RA	GSSPFG00017368001-RA_16906-16958	scaffold_9429_17752	8	14	12327	m8	x	m8
157	GSSPFG00014246001-RA	GSSPFG00014246001-RA_2322-3437	scaffold_9429_17752	705	711	12362	8mer	x	8mer
158	GSSPFG00033850001-RA	GSSPFG00033850001-RA_157486-158319	scaffold_9429_17752	819	825	12433	m8	x	m8
159	GSSPFG00022684001-RA	GSSPFG00022684001-RA_20539-21058	scaffold_9429_17752	132	138	12472	1a	x	1a
160	GSSPFG00021056001.3-RA	GSSPFG00021056001.3-RA_145469-147020	scaffold_9429_17752	699	705	12525	8mer	x	8mer
161	GSSPFG00031443001.3-RA	GSSPFG00031443001.3-RA_1684-2059	scaffold_9429_17752	39	45	12619	m8	x	m8
162	GSSPFG00019499001-RA	GSSPFG00019499001-RA_3700-3889	scaffold_9429_17752	146	152	12646	1a	x	1a
163	GSSPFG00002975001-RA	GSSPFG00002975001-RA_149393-149816	scaffold_9429_17752	352	358	12723	m8	x	m8
164	GSSPFG00002976001-RA	GSSPFG00002976001-RA_159188-160425	scaffold_9429_17752	755	761	12739	m8	x	m8
165	GSSPFG00008165001-RA	GSSPFG00008165001-RA_243-642	scaffold_9429_17752	198	204	12873	m8	x	m8
166	GSSPFG00010431001.3-RA	GSSPFG00010431001.3-RA_171845-173100	scaffold_9429_17752	19	25	13060	1a	x	1a
167	GSSPFG00026576001-RA	GSSPFG00026576001-RA_2177-3376	scaffold_9429_17752	430	436	13305	m8	x	m8
168	GSSPFG00019661001-RA	GSSPFG00019661001-RA_2406-2998	scaffold_9429_17752	492	498	13339	1a	x	1a
169	GSSPFG00028542001-RA	GSSPFG00028542001-RA_148274-148599	scaffold_9429_17752	47	53	13388	m8	x	m8
170	GSSPFG00033425001.4-RA	GSSPFG00033425001.4-RA_42-2358	scaffold_9429_17752	554	560	13485	1a	x	1a
171	GSSPFG00031286001-RA	GSSPFG00031286001-RA_1156-2209	scaffold_9429_17752	485	491	13762	8mer	x	8mer
172	GSSPFG00000927001-RA	GSSPFG00000927001-RA_6178-6825	scaffold_9429_17752	540	546	13838	8mer	x	8mer
173	GSSPFG00010818001.3-RA	GSSPFG00010818001.3-RA_36577-38232	scaffold_9429_17752	387	393	14038	m8	x	m8
174	GSSPFG00031263001-RA	GSSPFG00031263001-RA_1139-2177	scaffold_9429_17752	721	727	14062	1a	x	1a
175	GSSPFG00025868001-RA	GSSPFG00025868001-RA_24232-25096	scaffold_9429_17752	558	564	14225	8mer	x	8mer
176	GSSPFG00022879001-RA	GSSPFG00022879001-RA_2046-2902	scaffold_9429_17752	361	367	14265	m8	x	m8
177	GSSPFG00007227001-RA	GSSPFG00007227001-RA_27501-27852	scaffold_9429_17752	155	161	14422	1a	x	1a
178	GSSPFG00027787001-RA	GSSPFG00027787001-RA_31836-32055	scaffold_9429_17752	204	210	14491	m8	x	m8
179	GSSPFG00012069001.3-RA	GSSPFG00012069001.3-RA_2196-2508	scaffold_9429_17752	276	282	14533	1a	x	1a
180	GSSPFG00001565001-RA	GSSPFG00001565001-RA_61682-62609	scaffold_9429_17752	884	890	14554	8mer	x	8mer
181	GSSPFG00018484001-RA	GSSPFG00018484001-RA_1315-2488	scaffold_9429_17752	455	461	14757	m8	x	m8
182	GSSPFG00030839001-RA	GSSPFG00030839001-RA_29873-30983	scaffold_9429_17752	842	848	14846	m8	x	m8
183	GSSPFG00001905001-RA	GSSPFG00001905001-RA_195-1110	scaffold_9429_17752	494	500	15004	8mer	x	8mer
184	GSSPFG00018077001-RA	GSSPFG00018077001-RA_14135-15100	scaffold_9429_17752	424	430	15101	8mer	x	8mer
185	GSSPFG00003576001-RA	GSSPFG00003576001-RA_1995-2533	scaffold_9429_17752	157	163	15147	m8	x	m8
186	GSSPFG00020546001-RA	GSSPFG00020546001-RA_403635-405236	scaffold_9429_17752	302	308	15176	8mer	x	8mer
187	GSSPFG00024318001-RA	GSSPFG00024318001-RA_1515-2201	scaffold_9429_17752	204	210	15210	8mer	x	8mer
188	GSSPFG00029006001-RA	GSSPFG00029006001-RA_1234-2300	scaffold_9429_17752	978	984	15246	m8	x	m8
189	GSSPFG00027387001-RA	GSSPFG00027387001-RA_1510-2510	scaffold_9429_17752	833	839	15259	1a	x	1a
190	GSSPFG00007492001-RA	GSSPFG00007492001-RA_2470-3500	scaffold_9429_17752	267	273	15318	8mer	x	8mer
191	GSSPFG00026502001-RA	GSSPFG00026502001-RA_28553-29667	scaffold_9429_17752	321	327	15391	m8	x	m8
192	GSSPFG00034231001-RA	GSSPFG00034231001-RA_12271-12598	scaffold_9429_17752	73	79	15623	m8	x	m8
193	GSSPFG00034233001-RA	GSSPFG00034233001-RA_26206-26608	scaffold_9429_17752	89	95	15632	8mer	x	8mer
194	GSSPFG00016417001-RA	GSSPFG00016417001-RA_357307-358677	scaffold_9429_17752	699	705	15740	m8	x	m8
195	GSSPFG00011936001-RA	GSSPFG00011936001-RA_28321-28484	scaffold_9429_17752	122	128	15786	1a	x	1a
196	GSSPFG00005230001-RA	GSSPFG00005230001-RA_16532-17828	scaffold_9429_17752	96	102	15888	8mer	x	8mer
197	GSSPFG00019887001-RA	GSSPFG00019887001-RA_24585-26022	scaffold_9429_17752	1061	1067	15952	8mer	x	8mer
198	GSSPFG00014231001-RA	GSSPFG00014231001-RA_22336-23263	scaffold_9429_17752	767	773	16022	m8	x	m8
199	GSSPFG00027724001-RA	GSSPFG00027724001-RA_1882-2461	scaffold_9429_17752	267	273	16034	8mer	x	8mer
200	GSSPFG00005766001-RA	GSSPFG00005766001-RA_7063-7434	scaffold_9429_17752	7	13	16157	8mer	x	8mer
201	GSSPFG00005769001-RA	GSSPFG00005769001-RA_26536-27413	scaffold_9429_17752	565	571	16171	1a	x	1a
202	GSSPFG00015409001-RA	GSSPFG00015409001-RA_1624-2334	scaffold_9429_17752	379	385	16237	1a	x	1a
203	GSSPFG00009569001.3-RA	GSSPFG00009569001.3-RA_962-2127	scaffold_9429_17752	1115	1121	16256	m8	x	m8
204	GSSPFG00007685001-RA	GSSPFG00007685001-RA_646-1565	scaffold_9429_17752	456	462	16269	m8	x	m8
205	GSSPFG00002041001-RA	GSSPFG00002041001-RA_17168-17330	scaffold_9429_17752	36	42	16325	1a	x	1a
206	GSSPFG00011377001-RA	GSSPFG00011377001-RA_333-1499	scaffold_9429_17752	981	987	16378	m8	x	m8
207	GSSPFG00007709001-RA	GSSPFG00007709001-RA_24864-25297	scaffold_9429_17752	252	258	16473	8mer	x	8mer
208	GSSPFG00012309001-RA	GSSPFG00012309001-RA_20846-21132	scaffold_9429_17752	36	42	16488	8mer	x	8mer
209	GSSPFG00031041001-RA	GSSPFG00031041001-RA_27911-28958	scaffold_9429_17752	146	152	16598	8mer	x	8mer
210	GSSPFG00013210001-RA	GSSPFG00013210001-RA_32965-34623	scaffold_9429_17752	878	884	16728	m8	x	m8
211	GSSPFG00014426001-RA	GSSPFG00014426001-RA_80366-81078	scaffold_9429_17752	706	712	16797	1a	x	1a
212	GSSPFG00032050001-RA	GSSPFG00032050001-RA_103729-105085	scaffold_9429_17752	877	883	16935	8mer	x	8mer
213	GSSPFG00005870001-RA	GSSPFG00005870001-RA_5848-6597	scaffold_9429_17752	223	229	16962	1a	x	1a
214	GSSPFG00035318001.3-RA	GSSPFG00035318001.3-RA_1-581	scaffold_9429_17752	64	70	16993	1a	x	1a
215	GSSPFG00017804001.2-RA	GSSPFG00017804001.2-RA_14827-18049	scaffold_9429_17752	2441	2447	17483	1a	x	1a
216	GSSPFG00009608001-RA	GSSPFG00009608001-RA_237-701	scaffold_9429_17752	83	89	17625	1a	x	1a
217	GSSPFG00017385001-RA	GSSPFG00017385001-RA_1007-1981	scaffold_9429_17752	861	867	17679	1a	x	1a
218	GSSPFG00026301001-RA	GSSPFG00026301001-RA_3841-5575	scaffold_9429_17752	1630	1636	17842	m8	x	m8
219	GSSPFG00020786001-RA	GSSPFG00020786001-RA_19416-20550	scaffold_9429_17752	971	977	17883	m8	x	m8
220	GSSPFG00020790001-RA	GSSPFG00020790001-RA_101166-101789	scaffold_9429_17752	320	326	17891	8mer	x	8mer
221	GSSPFG00032250001-RA	GSSPFG00032250001-RA_25440-26664	scaffold_9429_17752	1177	1183	17940	m8	x	m8
222	GSSPFG00021173001-RA	GSSPFG00021173001-RA_158545-159495	scaffold_9429_17752	420	426	17991	8mer	x	8mer
223	GSSPFG00000121001-RA	GSSPFG00000121001-RA_19406-20016	scaffold_9429_17752	487	493	18064	1a	x	1a
224	GSSPFG00019740001-RA	GSSPFG00019740001-RA_1589-3177	scaffold_9429_17752	534	540	18156	m8	x	m8
225	GSSPFG00008118001-RA	GSSPFG00008118001-RA_10862-10968	scaffold_9429_17752	36	42	18314	m8	x	m8
226	GSSPFG00022519001-RA	GSSPFG00022519001-RA_22894-23496	scaffold_9429_17752	58	64	18366	m8	x	m8
227	GSSPFG00016994001-RA	GSSPFG00016994001-RA_77723-78534	scaffold_9429_17752	411	417	18545	m8	x	m8
228	GSSPFG00016994001-RA	GSSPFG00016994001-RA_77723-78534	scaffold_9429_17752	94	100	18546	1a	x	1a
229	GSSPFG00017003001-RA	GSSPFG00017003001-RA_139843-139998	scaffold_9429_17752	9	15	18569	8mer	x	8mer
230	GSSPFG00034572001-RA	GSSPFG00034572001-RA_1250-3186	scaffold_9429_17752	786	792	18782	1a	x	1a
231	GSSPFG00019069001-RA	GSSPFG00019069001-RA_6589-8153	scaffold_9429_17752	904	910	18832	1a	x	1a
232	GSSPFG00024213001-RA	GSSPFG00024213001-RA_20059-21360	scaffold_9429_17752	241	247	19088	1a	x	1a
233	GSSPFG00007832001-RA	GSSPFG00007832001-RA_14619-16201	scaffold_9429_17752	830	836	19239	m8	x	m8
234	GSSPFG00000844001-RA	GSSPFG00000844001-RA_149860-150746	scaffold_9429_17752	511	517	19287	8mer	x	8mer
235	GSSPFG00027050001.2-RA	GSSPFG00027050001.2-RA_16694-19471	scaffold_9429_17752	1659	1665	19354	1a	x	1a
236	GSSPFG00027050001.2-RA	GSSPFG00027050001.2-RA_16694-19471	scaffold_9429_17752	837	843	19355	1a	x	1a
237	GSSPFG00024272001-RA	GSSPFG00024272001-RA_13867-14989	scaffold_9429_17752	338	344	19401	1a	x	1a
238	GSSPFG00023124001-RA	GSSPFG00023124001-RA_14147-15367	scaffold_9429_17752	78	84	19433	1a	x	1a
239	GSSPFG00028770001-RA	GSSPFG00028770001-RA_20699-21973	scaffold_9429_17752	456	462	19498	1a	x	1a
240	GSSPFG00011565001-RA	GSSPFG00011565001-RA_12424-13527	scaffold_9429_17752	698	704	19605	8mer	x	8mer
241	GSSPFG00011565001-RA	GSSPFG00011565001-RA_12424-13527	scaffold_9429_17752	729	735	19606	8mer	x	8mer
242	GSSPFG00018170001-RA	GSSPFG00018170001-RA_47183-47440	scaffold_9429_17752	198	204	19827	1a	x	1a
243	GSSPFG00009209001-RA	GSSPFG00009209001-RA_23935-24796	scaffold_9429_17752	465	471	19944	1a	x	1a
244	GSSPFG00013817001-RA	GSSPFG00013817001-RA_8898-10141	scaffold_9429_17752	293	299	20127	8mer	x	8mer
245	GSSPFG00005193001-RA	GSSPFG00005193001-RA_5017-6196	scaffold_9429_17752	197	203	20349	m8	x	m8
246	GSSPFG00019653001-RA	GSSPFG00019653001-RA_105731-106655	scaffold_9429_17752	842	848	20666	1a	x	1a
247	GSSPFG00034259001-RA	GSSPFG00034259001-RA_973-1157	scaffold_9429_17752	10	16	20675	1a	x	1a
248	GSSPFG00002426001.3-RA	GSSPFG00002426001.3-RA_1145-3100	scaffold_9429_17752	1837	1843	20917	1a	x	1a
249	GSSPFG00010361001-RA	GSSPFG00010361001-RA_232-826	scaffold_9429_17752	512	518	20947	1a	x	1a
250	GSSPFG00020928001-RA	GSSPFG00020928001-RA_10394-10855	scaffold_9429_17752	32	38	21126	m8	x	m8
251	GSSPFG00002059001-RA	GSSPFG00002059001-RA_92298-92833	scaffold_9429_17752	11	17	21149	m8	x	m8
252	GSSPFG00035978001.2-RA	GSSPFG00035978001.2-RA_133986-138635	scaffold_9429_17752	4028	4034	21250	1a	x	1a
253	GSSPFG00010839001-RA	GSSPFG00010839001-RA_64318-64678	scaffold_9429_17752	94	100	21353	m8	x	m8
254	GSSPFG00032564001-RA	GSSPFG00032564001-RA_17746-18321	scaffold_9429_17752	375	381	21369	1a	x	1a
255	GSSPFG00007081001-RA	GSSPFG00007081001-RA_5157-6404	scaffold_9429_17752	1045	1051	21670	m8	x	m8
256	GSSPFG00000633001-RA	GSSPFG00000633001-RA_19077-20116	scaffold_9429_17752	20	26	21771	1a	x	1a
257	GSSPFG00015174001-RA	GSSPFG00015174001-RA_4481-5969	scaffold_9429_17752	497	503	21781	8mer	x	8mer
258	GSSPFG00019022001-RA	GSSPFG00019022001-RA_17185-18645	scaffold_9429_17752	441	447	22064	m8	x	m8
259	GSSPFG00011185001-RA	GSSPFG00011185001-RA_12511-14022	scaffold_9429_17752	1290	1296	22474	1a	x	1a
260	GSSPFG00019326001-RA	GSSPFG00019326001-RA_26487-27527	scaffold_9429_17752	168	174	22549	8mer	x	8mer
261	GSSPFG00023470001-RA	GSSPFG00023470001-RA_17756-18989	scaffold_9429_17752	561	567	22616	m8	x	m8
262	GSSPFG00016507001-RA	GSSPFG00016507001-RA_3739-4690	scaffold_9429_17752	657	663	22635	8mer	x	8mer
263	GSSPFG00016507001-RA	GSSPFG00016507001-RA_3739-4690	scaffold_9429_17752	671	677	22636	m8	x	m8
264	GSSPFG00010092001-RA	GSSPFG00010092001-RA_97325-98262	scaffold_9429_17752	276	282	22694	8mer	x	8mer
265	GSSPFG00026936001-RA	GSSPFG00026936001-RA_64584-65138	scaffold_9429_17752	131	137	22756	1a	x	1a
266	GSSPFG00021440001.3-RA	GSSPFG00021440001.3-RA_117342-118691	scaffold_9429_17752	896	902	22796	m8	x	m8
267	GSSPFG00032230001-RA	GSSPFG00032230001-RA_2130-3173	scaffold_9429_17752	517	523	22883	1a	x	1a
268	GSSPFG00011742001-RA	GSSPFG00011742001-RA_5457-6267	scaffold_9429_17752	52	58	22954	1a	x	1a
269	GSSPFG00011856001-RA	GSSPFG00011856001-RA_5557-6751	scaffold_9429_17752	425	431	23173	8mer	x	8mer
270	GSSPFG00013592001.3-RA	GSSPFG00013592001.3-RA_4493-5248	scaffold_9429_17752	617	623	23294	m8	x	m8
271	GSSPFG00023883001-RA	GSSPFG00023883001-RA_58806-60542	scaffold_9429_17752	811	817	23318	1a	x	1a
272	GSSPFG00033486001-RA	GSSPFG00033486001-RA_16156-17619	scaffold_9429_17752	1275	1281	23341	1a	x	1a
273	GSSPFG00022079001-RA	GSSPFG00022079001-RA_2860-4067	scaffold_9429_17752	531	537	23384	8mer	x	8mer
274	GSSPFG00015551001-RA	GSSPFG00015551001-RA_8504-9477	scaffold_9429_17752	236	242	23552	1a	x	1a
275	GSSPFG00010160001-RA	GSSPFG00010160001-RA_28735-29585	scaffold_9429_17752	814	820	23706	1a	x	1a
276	GSSPFG00016464001-RA	GSSPFG00016464001-RA_1389-1679	scaffold_9429_17752	69	75	23792	1a	x	1a
277	GSSPFG00031711001-RA	GSSPFG00031711001-RA_92746-93191	scaffold_9429_17752	90	96	23831	8mer	x	8mer
278	GSSPFG00019994001-RA	GSSPFG00019994001-RA_1409-2526	scaffold_9429_17752	555	561	23962	m8	x	m8
279	GSSPFG00017924001-RA	GSSPFG00017924001-RA_10069-11297	scaffold_9429_17752	493	499	23988	1a	x	1a
280	GSSPFG00006080001-RA	GSSPFG00006080001-RA_3451-5018	scaffold_9429_17752	1376	1382	24070	8mer	x	8mer
281	GSSPFG00003409001.3-RA	GSSPFG00003409001.3-RA_36012-37365	scaffold_9429_17752	320	326	24121	8mer	x	8mer
282	GSSPFG00028823001-RA	GSSPFG00028823001-RA_69490-70824	scaffold_9429_17752	1054	1060	24256	m8	x	m8
283	GSSPFG00030908001-RA	GSSPFG00030908001-RA_16192-16332	scaffold_9429_17752	111	117	24316	8mer	x	8mer
284	GSSPFG00008368001-RA	GSSPFG00008368001-RA_12003-13347	scaffold_9429_17752	1137	1143	24372	m8	x	m8
285	GSSPFG00031342001.3-RA	GSSPFG00031342001.3-RA_15456-16359	scaffold_9429_17752	400	406	24416	m8	x	m8
286	GSSPFG00009321001-RA	GSSPFG00009321001-RA_12335-13210	scaffold_9429_17752	750	756	24446	1a	x	1a
287	GSSPFG00017973001-RA	GSSPFG00017973001-RA_12377-13478	scaffold_9429_17752	527	533	24571	1a	x	1a
288	GSSPFG00017973001-RA	GSSPFG00017973001-RA_12377-13478	scaffold_9429_17752	620	626	24572	1a	x	1a
289	GSSPFG00030445001-RA	GSSPFG00030445001-RA_14962-16576	scaffold_9429_17752	1089	1095	24632	8mer	x	8mer
290	GSSPFG00010868001-RA	GSSPFG00010868001-RA_9438-10076	scaffold_9429_17752	450	456	24656	m8	x	m8
291	GSSPFG00028293001-RA	GSSPFG00028293001-RA_11124-12072	scaffold_9429_17752	742	748	24709	8mer	x	8mer
292	GSSPFG00026454001-RA	GSSPFG00026454001-RA_43011-44468	scaffold_9429_17752	81	87	24875	m8	x	m8
293	GSSPFG00025892001-RA	GSSPFG00025892001-RA_54111-55315	scaffold_9429_17752	320	326	24906	8mer	x	8mer
294	GSSPFG00032612001-RA	GSSPFG00032612001-RA_10522-11055	scaffold_9429_17752	125	131	25144	m8	x	m8
295	GSSPFG00032612001-RA	GSSPFG00032612001-RA_10522-11055	scaffold_9429_17752	202	208	25145	8mer	x	8mer
296	GSSPFG00032612001-RA	GSSPFG00032612001-RA_10522-11055	scaffold_9429_17752	397	403	25146	m8	x	m8
297	GSSPFG00029613001-RA	GSSPFG00029613001-RA_1678-3221	scaffold_9429_17752	224	230	25192	1a	x	1a
298	GSSPFG00021006001-RA	GSSPFG00021006001-RA_5683-7383	scaffold_9429_17752	1023	1029	25333	8mer	x	8mer
299	GSSPFG00021006001-RA	GSSPFG00021006001-RA_5683-7383	scaffold_9429_17752	1076	1082	25334	8mer	x	8mer
300	GSSPFG00021006001-RA	GSSPFG00021006001-RA_5683-7383	scaffold_9429_17752	375	381	25335	8mer	x	8mer
301	GSSPFG00021006001-RA	GSSPFG00021006001-RA_5683-7383	scaffold_9429_17752	547	553	25336	8mer	x	8mer
302	GSSPFG00021006001-RA	GSSPFG00021006001-RA_5683-7383	scaffold_9429_17752	672	678	25337	1a	x	1a
303	GSSPFG00021006001-RA	GSSPFG00021006001-RA_5683-7383	scaffold_9429_17752	717	723	25338	8mer	x	8mer
304	GSSPFG00021006001-RA	GSSPFG00021006001-RA_5683-7383	scaffold_9429_17752	774	780	25339	8mer	x	8mer
305	GSSPFG00021006001-RA	GSSPFG00021006001-RA_5683-7383	scaffold_9429_17752	825	831	25340	1a	x	1a
306	GSSPFG00021006001-RA	GSSPFG00021006001-RA_5683-7383	scaffold_9429_17752	871	877	25341	1a	x	1a
307	GSSPFG00021006001-RA	GSSPFG00021006001-RA_5683-7383	scaffold_9429_17752	917	923	25342	1a	x	1a
308	GSSPFG00021006001-RA	GSSPFG00021006001-RA_5683-7383	scaffold_9429_17752	975	981	25343	1a	x	1a
309	GSSPFG00016786001.2-RA	GSSPFG00016786001.2-RA_13677-15101	scaffold_9429_17752	123	129	25399	1a	x	1a
310	GSSPFG00012528001-RA	GSSPFG00012528001-RA_13045-14114	scaffold_9429_17752	311	317	25483	8mer	x	8mer
311	GSSPFG00005884001.3-RA	GSSPFG00005884001.3-RA_14062-15304	scaffold_9429_17752	894	900	25582	8mer	x	8mer
312	GSSPFG00023440001-RA	GSSPFG00023440001-RA_18023-19610	scaffold_9429_17752	323	329	25626	8mer	x	8mer
313	GSSPFG00023441001-RA	GSSPFG00023441001-RA_50454-51920	scaffold_9429_17752	1260	1266	25643	m8	x	m8
314	GSSPFG00008339001-RA	GSSPFG00008339001-RA_12513-14024	scaffold_9429_17752	967	973	25806	8mer	x	8mer
315	GSSPFG00017423001-RA	GSSPFG00017423001-RA_6938-7870	scaffold_9429_17752	152	158	25857	1a	x	1a
316	GSSPFG00007368001-RA	GSSPFG00007368001-RA_7576-8772	scaffold_9429_17752	331	337	25936	m8	x	m8
317	GSSPFG00005180001-RA	GSSPFG00005180001-RA_14094-14735	scaffold_9429_17752	43	49	25990	1a	x	1a
318	GSSPFG00019386001-RA	GSSPFG00019386001-RA_90444-91861	scaffold_9429_17752	139	145	26049	1a	x	1a
319	GSSPFG00030835001-RA	GSSPFG00030835001-RA_112006-112496	scaffold_9429_17752	169	175	26055	1a	x	1a
320	GSSPFG00024669001-RA	GSSPFG00024669001-RA_6679-7744	scaffold_9429_17752	742	748	26076	8mer	x	8mer
321	GSSPFG00016528001-RA	GSSPFG00016528001-RA_8158-9663	scaffold_9429_17752	208	214	26111	8mer	x	8mer
322	GSSPFG00016544001-RA	GSSPFG00016544001-RA_281556-282575	scaffold_9429_17752	464	470	26126	8mer	x	8mer
323	GSSPFG00015485001-RA	GSSPFG00015485001-RA_1958-2811	scaffold_9429_17752	807	813	26472	m8	x	m8
324	GSSPFG00015485001-RA	GSSPFG00015485001-RA_1958-2811	scaffold_9429_17752	833	839	26473	m8	x	m8
325	GSSPFG00015485001-RA	GSSPFG00015485001-RA_1958-2811	scaffold_9429_17752	843	849	26474	m8	x	m8
326	GSSPFG00015311001-RA	GSSPFG00015311001-RA_10031-10550	scaffold_9429_17752	512	518	26789	m8	x	m8
327	GSSPFG00009387001-RA	GSSPFG00009387001-RA_64030-64679	scaffold_9429_17752	447	453	26799	1a	x	1a
328	GSSPFG00003341001-RA	GSSPFG00003341001-RA_9589-10322	scaffold_9429_17752	552	558	26858	1a	x	1a
329	GSSPFG00003012001-RA	GSSPFG00003012001-RA_7795-9001	scaffold_9429_17752	964	970	26877	8mer	x	8mer
330	GSSPFG00006774001-RA	GSSPFG00006774001-RA_4855-6255	scaffold_9429_17752	948	954	26958	m8	x	m8
331	GSSPFG00025283001-RA	GSSPFG00025283001-RA_7985-8905	scaffold_9429_17752	897	903	27111	m8	x	m8
332	GSSPFG00000965001-RA	GSSPFG00000965001-RA_5266-6139	scaffold_9429_17752	12	18	27144	8mer	x	8mer
333	GSSPFG00009904001-RA	GSSPFG00009904001-RA_9570-11122	scaffold_9429_17752	357	363	27169	m8	x	m8
334	GSSPFG00024457001-RA	GSSPFG00024457001-RA_12195-13139	scaffold_9429_17752	135	141	27274	8mer	x	8mer
335	GSSPFG00008222001-RA	GSSPFG00008222001-RA_9930-11716	scaffold_9429_17752	550	556	27393	8mer	x	8mer
336	GSSPFG00018683001-RA	GSSPFG00018683001-RA_3372-4265	scaffold_9429_17752	761	767	27454	8mer	x	8mer
337	GSSPFG00004142001-RA	GSSPFG00004142001-RA_7120-8047	scaffold_9429_17752	566	572	27496	8mer	x	8mer
338	GSSPFG00000066001-RA	GSSPFG00000066001-RA_82368-82735	scaffold_9429_17752	260	266	27521	1a	x	1a
339	GSSPFG00024240001-RA	GSSPFG00024240001-RA_11449-11865	scaffold_9429_17752	44	50	27548	8mer	x	8mer
340	GSSPFG00008775001-RA	GSSPFG00008775001-RA_8574-9965	scaffold_9429_17752	763	769	27815	m8	x	m8
341	GSSPFG00005268001.2-RA	GSSPFG00005268001.2-RA_34834-36150	scaffold_9429_17752	696	702	27841	m8	x	m8
342	GSSPFG00024655001-RA	GSSPFG00024655001-RA_8826-8904	scaffold_9429_17752	49	55	27967	m8	x	m8
343	GSSPFG00031630001-RA	GSSPFG00031630001-RA_6847-8389	scaffold_9429_17752	1532	1538	28036	8mer	x	8mer
344	GSSPFG00024749001-RA	GSSPFG00024749001-RA_9705-10905	scaffold_9429_17752	1147	1153	28261	m8	x	m8
345	GSSPFG00034878001-RA	GSSPFG00034878001-RA_56854-57892	scaffold_9429_17752	1003	1009	28367	1a	x	1a
346	GSSPFG00024713001-RA	GSSPFG00024713001-RA_10701-12373	scaffold_9429_17752	599	605	28403	m8	x	m8
347	GSSPFG00018772001-RA	GSSPFG00018772001-RA_9482-9782	scaffold_9429_17752	77	83	28429	8mer	x	8mer
348	GSSPFG00013674001-RA	GSSPFG00013674001-RA_9409-10528	scaffold_9429_17752	139	145	28465	8mer	x	8mer
349	GSSPFG00017383001-RA	GSSPFG00017383001-RA_10799-11904	scaffold_9429_17752	797	803	28474	8mer	x	8mer
350	GSSPFG00021494001-RA	GSSPFG00021494001-RA_2319-3185	scaffold_9429_17752	333	339	28766	m8	x	m8
351	GSSPFG00008474001-RA	GSSPFG00008474001-RA_11679-12095	scaffold_9429_17752	232	238	28818	m8	x	m8
352	GSSPFG00012640001-RA	GSSPFG00012640001-RA_3390-3471	scaffold_9429_17752	36	42	28898	1a	x	1a
353	GSSPFG00030401001-RA	GSSPFG00030401001-RA_125915-126914	scaffold_9429_17752	170	176	28980	m8	x	m8
354	GSSPFG00021874001-RA	GSSPFG00021874001-RA_2972-4394	scaffold_9429_17752	610	616	28995	8mer	x	8mer
355	GSSPFG00014819001-RA	GSSPFG00014819001-RA_4843-6201	scaffold_9429_17752	699	705	29075	8mer	x	8mer
356	GSSPFG00014821001-RA	GSSPFG00014821001-RA_11129-11554	scaffold_9429_17752	254	260	29084	8mer	x	8mer
357	GSSPFG00014821001-RA	GSSPFG00014821001-RA_11129-11554	scaffold_9429_17752	28	34	29085	1a	x	1a
358	GSSPFG00013838001-RA	GSSPFG00013838001-RA_5730-6278	scaffold_9429_17752	465	471	29098	1a	x	1a
359	GSSPFG00028435001-RA	GSSPFG00028435001-RA_3734-4741	scaffold_9429_17752	286	292	29118	m8	x	m8
360	GSSPFG00024330001-RA	GSSPFG00024330001-RA_8925-9819	scaffold_9429_17752	153	159	29196	m8	x	m8
361	GSSPFG00019456001-RA	GSSPFG00019456001-RA_7674-8176	scaffold_9429_17752	367	373	29222	8mer	x	8mer
362	GSSPFG00015250001-RA	GSSPFG00015250001-RA_1550-2347	scaffold_9429_17752	663	669	29262	m8	x	m8
363	GSSPFG00032134001-RA	GSSPFG00032134001-RA_5450-6777	scaffold_9429_17752	812	818	29286	1a	x	1a
364	GSSPFG00021528001-RA	GSSPFG00021528001-RA_8095-9380	scaffold_9429_17752	378	384	29297	1a	x	1a
365	GSSPFG00001046001-RA	GSSPFG00001046001-RA_10000-10675	scaffold_9429_17752	114	120	29309	1a	x	1a
366	GSSPFG00001046001-RA	GSSPFG00001046001-RA_10000-10675	scaffold_9429_17752	427	433	29310	8mer	x	8mer
367	GSSPFG00030655001-RA	GSSPFG00030655001-RA_6148-7240	scaffold_9429_17752	277	283	29318	1a	x	1a
368	GSSPFG00033984001-RA	GSSPFG00033984001-RA_9525-9734	scaffold_9429_17752	61	67	29375	8mer	x	8mer
369	GSSPFG00012371001-RA	GSSPFG00012371001-RA_9127-10337	scaffold_9429_17752	518	524	29521	8mer	x	8mer
370	GSSPFG00032445001-RA	GSSPFG00032445001-RA_47522-48221	scaffold_9429_17752	323	329	29583	8mer	x	8mer
371	GSSPFG00023609001-RA	GSSPFG00023609001-RA_2200-3089	scaffold_9429_17752	635	641	29589	m8	x	m8
372	GSSPFG00014881001-RA	GSSPFG00014881001-RA_6041-7084	scaffold_9429_17752	832	838	29613	1a	x	1a
373	GSSPFG00020808001.3-RA	GSSPFG00020808001.3-RA_129025-133664	scaffold_9429_17752	3877	3883	29742	8mer	x	8mer
374	GSSPFG00020808001.3-RA	GSSPFG00020808001.3-RA_129025-133664	scaffold_9429_17752	4172	4178	29743	m8	x	m8
375	GSSPFG00027765001-RA	GSSPFG00027765001-RA_74752-75961	scaffold_9429_17752	484	490	29885	m8	x	m8
376	GSSPFG00012997001-RA	GSSPFG00012997001-RA_46567-47655	scaffold_9429_17752	438	444	29966	m8	x	m8
377	GSSPFG00012166001-RA	GSSPFG00012166001-RA_8259-9658	scaffold_9429_17752	192	198	30019	1a	x	1a
378	GSSPFG00034400001-RA	GSSPFG00034400001-RA_4515-5868	scaffold_9429_17752	1341	1347	30091	m8	x	m8
379	GSSPFG00035551001.3-RA	GSSPFG00035551001.3-RA_2805-5095	scaffold_9429_17752	2030	2036	30213	1a	x	1a
380	GSSPFG00035687001.2-RA	GSSPFG00035687001.2-RA_850-1407	scaffold_9429_17752	383	389	30277	1a	x	1a
381	GSSPFG00023863001.3-RA	GSSPFG00023863001.3-RA_3535-4740	scaffold_9429_17752	795	801	30296	8mer	x	8mer
382	GSSPFG00001258001-RA	GSSPFG00001258001-RA_3914-5005	scaffold_9429_17752	939	945	30441	8mer	x	8mer
383	GSSPFG00021257001-RA	GSSPFG00021257001-RA_66031-66272	scaffold_9429_17752	178	184	30699	m8	x	m8
384	GSSPFG00017391001-RA	GSSPFG00017391001-RA_3638-4000	scaffold_9429_17752	247	253	30912	m8	x	m8
385	GSSPFG00026400001.2-RA	GSSPFG00026400001.2-RA_5108-6311	scaffold_9429_17752	477	483	30943	1a	x	1a
386	GSSPFG00003980001-RA	GSSPFG00003980001-RA_4988-5540	scaffold_9429_17752	484	490	31056	m8	x	m8
387	GSSPFG00008671001-RA	GSSPFG00008671001-RA_4823-6222	scaffold_9429_17752	992	998	31080	8mer	x	8mer
388	GSSPFG00002599001-RA	GSSPFG00002599001-RA_2076-2738	scaffold_9429_17752	329	335	31144	m8	x	m8
389	GSSPFG00032942001-RA	GSSPFG00032942001-RA_7804-8801	scaffold_9429_17752	609	615	31158	m8	x	m8
390	GSSPFG00001743001-RA	GSSPFG00001743001-RA_8054-8971	scaffold_9429_17752	492	498	31169	1a	x	1a
391	GSSPFG00028350001-RA	GSSPFG00028350001-RA_3091-4454	scaffold_9429_17752	1019	1025	31322	8mer	x	8mer
392	GSSPFG00022306001-RA	GSSPFG00022306001-RA_86294-87519	scaffold_9429_17752	349	355	31424	m8	x	m8
393	GSSPFG00035561001.3-RA	GSSPFG00035561001.3-RA_4653-6703	scaffold_9429_17752	1126	1132	31564	8mer	x	8mer
394	GSSPFG00035561001.3-RA	GSSPFG00035561001.3-RA_4653-6703	scaffold_9429_17752	1144	1150	31565	1a	x	1a
395	GSSPFG00035561001.3-RA	GSSPFG00035561001.3-RA_4653-6703	scaffold_9429_17752	793	799	31566	8mer	x	8mer
396	GSSPFG00006987001.2-RB_77656-78160	GSSPFG00006987001.2-RB_77656-78160	scaffold_9429_17752	56	62	31760	8mer	x	8mer
397	GSSPFG00015849001-RA	GSSPFG00015849001-RA_34755-35320	scaffold_9429_17752	488	494	31880	1a	x	1a
398	GSSPFG00024856001.2-RA	GSSPFG00024856001.2-RA_282367-283139	scaffold_9429_17752	510	516	31898	8mer	x	8mer
399	GSSPFG00029303001-RA	GSSPFG00029303001-RA_68335-69212	scaffold_9429_17752	710	716	31926	8mer	x	8mer
400	GSSPFG00002861001-RA	GSSPFG00002861001-RA_18600-19608	scaffold_9429_17752	674	680	32044	1a	x	1a
401	GSSPFG00005411001-RA	GSSPFG00005411001-RA_160850-162567	scaffold_9429_17752	971	977	32069	1a	x	1a
402	GSSPFG00005408001-RA	GSSPFG00005408001-RA_202088-207472	scaffold_9429_17752	48	54	32089	1a	x	1a
403	GSSPFG00030588001-RA	GSSPFG00030588001-RA_38487-39869	scaffold_9429_17752	1121	1127	32144	m8	x	m8
404	GSSPFG00025844001-RA	GSSPFG00025844001-RA_151093-152856	scaffold_9429_17752	835	841	32301	m8	x	m8
405	GSSPFG00035992001.2-RA	GSSPFG00035992001.2-RA_27262-27508	scaffold_9429_17752	66	72	32365	8mer	x	8mer
406	GSSPFG00000680001-RA	GSSPFG00000680001-RA_325956-326547	scaffold_9429_17752	90	96	32493	m8	x	m8
407	GSSPFG00029941001-RA	GSSPFG00029941001-RA_112774-114397	scaffold_9429_17752	1543	1549	32709	8mer	x	8mer
408	GSSPFG00002515001.3-RA	GSSPFG00002515001.3-RA_20095-21295	scaffold_9429_17752	1056	1062	32741	8mer	x	8mer
409	GSSPFG00002515001.3-RA	GSSPFG00002515001.3-RA_20095-21295	scaffold_9429_17752	582	588	32742	m8	x	m8
410	GSSPFG00002515001.3-RA	GSSPFG00002515001.3-RA_20095-21295	scaffold_9429_17752	786	792	32743	m8	x	m8
411	GSSPFG00018633001-RA	GSSPFG00018633001-RA_10232-11722	scaffold_9429_17752	1409	1415	32895	1a	x	1a
412	GSSPFG00025873001-RA	GSSPFG00025873001-RA_4342-5449	scaffold_9429_17752	761	767	33280	m8	x	m8
413	GSSPFG00023864001-RA	GSSPFG00023864001-RA_58307-58934	scaffold_9429_17752	31	37	33287	8mer	x	8mer
414	GSSPFG00023869001-RA	GSSPFG00023869001-RA_110140-110278	scaffold_9429_17752	90	96	33310	8mer	x	8mer
415	GSSPFG00030545001-RA	GSSPFG00030545001-RA_28097-28423	scaffold_9429_17752	151	157	33418	8mer	x	8mer
416	GSSPFG00015134001-RA	GSSPFG00015134001-RA_125616-126971	scaffold_9429_17752	1014	1020	33442	1a	x	1a
417	GSSPFG00010685001-RA	GSSPFG00010685001-RA_4680-5728	scaffold_9429_17752	389	395	33490	1a	x	1a
418	GSSPFG00026372001-RA	GSSPFG00026372001-RA_21309-22491	scaffold_9429_17752	1121	1127	33565	m8	x	m8
419	GSSPFG00034000001-RA	GSSPFG00034000001-RA_204243-204952	scaffold_9429_17752	645	651	33598	8mer	x	8mer
420	GSSPFG00016244001-RA	GSSPFG00016244001-RA_80938-82106	scaffold_9429_17752	81	87	33612	8mer	x	8mer
421	GSSPFG00005491001-RA	GSSPFG00005491001-RA_115273-116544	scaffold_9429_17752	1037	1043	33629	8mer	x	8mer
422	GSSPFG00023651001-RA	GSSPFG00023651001-RA_42531-43223	scaffold_9429_17752	98	104	33768	8mer	x	8mer
423	GSSPFG00012734001-RA	GSSPFG00012734001-RA_328896-330437	scaffold_9429_17752	1479	1485	33953	8mer	x	8mer
424	GSSPFG00011000001.3-RA	GSSPFG00011000001.3-RA_427919-428306	scaffold_9429_17752	251	257	34053	1a	x	1a
425	GSSPFG00029130001-RA	GSSPFG00029130001-RA_26780-26999	scaffold_9429_17752	204	210	34106	m8	x	m8
426	GSSPFG00016696001-RA	GSSPFG00016696001-RA_5861-6905	scaffold_9429_17752	886	892	34501	m8	x	m8
427	GSSPFG00010860001-RA	GSSPFG00010860001-RA_4353-5844	scaffold_9429_17752	444	450	34579	1a	x	1a
428	GSSPFG00034760001.3-RA	GSSPFG00034760001.3-RA_424794-425467	scaffold_9429_17752	316	322	34622	m8	x	m8
429	GSSPFG00034741001.2-RA	GSSPFG00034741001.2-RA_583800-587848	scaffold_9429_17752	3971	3977	34654	m8	x	m8
430	GSSPFG00014191001-RA	GSSPFG00014191001-RA_77002-78183	scaffold_9429_17752	926	932	34690	8mer	x	8mer
431	GSSPFG00015008001-RA	GSSPFG00015008001-RA_284973-286618	scaffold_9429_17752	741	747	34757	m8	x	m8
432	GSSPFG00011603001-RA	GSSPFG00011603001-RA_1256-2221	scaffold_9429_17752	852	858	34793	1a	x	1a
433	GSSPFG00034667001-RA	GSSPFG00034667001-RA_639770-640914	scaffold_9429_17752	897	903	35075	1a	x	1a
434	GSSPFG00001726001-RA	GSSPFG00001726001-RA_8304-9644	scaffold_9429_17752	195	201	35125	1a	x	1a
435	GSSPFG00001726001-RA	GSSPFG00001726001-RA_8304-9644	scaffold_9429_17752	243	249	35126	m8	x	m8
436	GSSPFG00001726001-RA	GSSPFG00001726001-RA_8304-9644	scaffold_9429_17752	707	713	35127	m8	x	m8
437	GSSPFG00011518001-RA	GSSPFG00011518001-RA_43465-44566	scaffold_9429_17752	113	119	35202	m8	x	m8
438	GSSPFG00009499001-RA	GSSPFG00009499001-RA_13879-14897	scaffold_9429_17752	674	680	35479	m8	x	m8
439	GSSPFG00030670001-RA	GSSPFG00030670001-RA_35875-36911	scaffold_9429_17752	590	596	35599	m8	x	m8
440	GSSPFG00024832001.3-RA	GSSPFG00024832001.3-RA_86461-87098	scaffold_9429_17752	215	221	35638	m8	x	m8
441	GSSPFG00002721001-RA	GSSPFG00002721001-RA_78053-78412	scaffold_9429_17752	254	260	35675	1a	x	1a
442	GSSPFG00004042001-RA	GSSPFG00004042001-RA_44930-45471	scaffold_9429_17752	11	17	35706	8mer	x	8mer
443	GSSPFG00014525001-RA	GSSPFG00014525001-RA_61181-61470	scaffold_9429_17752	167	173	35723	m8	x	m8
444	GSSPFG00029033001-RA	GSSPFG00029033001-RA_42308-43502	scaffold_9429_17752	1148	1154	35745	8mer	x	8mer
445	GSSPFG00023213001-RA	GSSPFG00023213001-RA_231728-232822	scaffold_9429_17752	190	196	35885	m8	x	m8
446	GSSPFG00023213001-RA	GSSPFG00023213001-RA_231728-232822	scaffold_9429_17752	372	378	35886	1a	x	1a
447	GSSPFG00012920001-RA	GSSPFG00012920001-RA_142549-144075	scaffold_9429_17752	309	315	35936	8mer	x	8mer
448	GSSPFG00020686001-RA	GSSPFG00020686001-RA_391021-391494	scaffold_9429_17752	55	61	36002	1a	x	1a
449	GSSPFG00018531001-RA	GSSPFG00018531001-RA_460240-461785	scaffold_9429_17752	560	566	36038	1a	x	1a
450	GSSPFG00034655001.1-RA	GSSPFG00034655001.1-RA_710086-710852	scaffold_9429_17752	381	387	36130	m8	x	m8
451	GSSPFG00015641001-RA	GSSPFG00015641001-RA_50099-51343	scaffold_9429_17752	972	978	36182	8mer	x	8mer
452	GSSPFG00022989001-RA	GSSPFG00022989001-RA_23492-24180	scaffold_9429_17752	427	433	36223	m8	x	m8
453	GSSPFG00019996001-RA	GSSPFG00019996001-RA_13905-15143	scaffold_9429_17752	404	410	36327	8mer	x	8mer
454	GSSPFG00012403001.4-RA	GSSPFG00012403001.4-RA_46802-47495	scaffold_9429_17752	101	107	36393	m8	x	m8
455	GSSPFG00005171001-RA	GSSPFG00005171001-RA_197417-197916	scaffold_9429_17752	110	116	36465	1a	x	1a
456	GSSPFG00033563001-RA	GSSPFG00033563001-RA_17391-19026	scaffold_9429_17752	1494	1500	36503	8mer	x	8mer
457	GSSPFG00009965001-RA	GSSPFG00009965001-RA_18215-19269	scaffold_9429_17752	534	540	36539	m8	x	m8
458	GSSPFG00011965001-RA	GSSPFG00011965001-RA_53851-54221	scaffold_9429_17752	68	74	36646	m8	x	m8
459	GSSPFG00023520001-RA	GSSPFG00023520001-RA_347136-348348	scaffold_9429_17752	325	331	36701	m8	x	m8
460	GSSPFG00034061001-RA	GSSPFG00034061001-RA_123868-124438	scaffold_9429_17752	375	381	36762	1a	x	1a
461	GSSPFG00020222001-RA	GSSPFG00020222001-RA_176971-178488	scaffold_9429_17752	1077	1083	36962	1a	x	1a
462	GSSPFG00020222001-RA	GSSPFG00020222001-RA_176971-178488	scaffold_9429_17752	96	102	36963	8mer	x	8mer
463	GSSPFG00031352001-RA	GSSPFG00031352001-RA_137096-137365	scaffold_9429_17752	7	13	36998	m8	x	m8
464	GSSPFG00008457001-RA	GSSPFG00008457001-RA_86812-87736	scaffold_9429_17752	243	249	37026	8mer	x	8mer
465	GSSPFG00008457001-RA	GSSPFG00008457001-RA_86812-87736	scaffold_9429_17752	565	571	37027	1a	x	1a
466	GSSPFG00016111001-RA	GSSPFG00016111001-RA_85067-86553	scaffold_9429_17752	846	852	37073	1a	x	1a
467	GSSPFG00001349001-RA	GSSPFG00001349001-RA_13989-14421	scaffold_9429_17752	105	111	37162	8mer	x	8mer
468	GSSPFG00001346001-RA	GSSPFG00001346001-RA_26175-27249	scaffold_9429_17752	699	705	37176	m8	x	m8
469	GSSPFG00015067001-RA	GSSPFG00015067001-RA_250317-251092	scaffold_9429_17752	82	88	37241	1a	x	1a
470	GSSPFG00017733001-RA	GSSPFG00017733001-RA_113814-114784	scaffold_9429_17752	566	572	37296	1a	x	1a
471	GSSPFG00023910001-RA	GSSPFG00023910001-RA_26133-27213	scaffold_9429_17752	33	39	37363	m8	x	m8
472	GSSPFG00024737001-RA	GSSPFG00024737001-RA_28463-29336	scaffold_9429_17752	57	63	37416	m8	x	m8
473	GSSPFG00001534001-RA	GSSPFG00001534001-RA_4120-5171	scaffold_9429_17752	1035	1041	37656	1a	x	1a
474	GSSPFG00008431001-RA	GSSPFG00008431001-RA_76389-76847	scaffold_9429_17752	232	238	37689	8mer	x	8mer
475	GSSPFG00017613001.3-RA	GSSPFG00017613001.3-RA_4737-19168	scaffold_9429_17752	1493	1499	37716	8mer	x	8mer
476	GSSPFG00017613001.3-RA	GSSPFG00017613001.3-RA_4737-19168	scaffold_9429_17752	2520	2526	37717	8mer	x	8mer
477	GSSPFG00024037001-RA	GSSPFG00024037001-RA_9431-10014	scaffold_9429_17752	136	142	38015	m8	x	m8
478	GSSPFG00015809001-RA	GSSPFG00015809001-RA_28003-28400	scaffold_9429_17752	64	70	38177	1a	x	1a
479	GSSPFG00021663001-RA	GSSPFG00021663001-RA_71643-72873	scaffold_9429_17752	593	599	38627	m8	x	m8
480	GSSPFG00033052001-RA	GSSPFG00033052001-RA_146852-147355	scaffold_9429_17752	130	136	38703	8mer	x	8mer
481	GSSPFG00011276001-RA	GSSPFG00011276001-RA_179360-180393	scaffold_9429_17752	872	878	38720	8mer	x	8mer
482	GSSPFG00009845001-RA	GSSPFG00009845001-RA_44669-46115	scaffold_9429_17752	552	558	38850	m8	x	m8
483	GSSPFG00009845001-RA	GSSPFG00009845001-RA_44669-46115	scaffold_9429_17752	659	665	38851	8mer	x	8mer
484	GSSPFG00018843001-RA	GSSPFG00018843001-RA_149035-149463	scaffold_9429_17752	370	376	38868	1a	x	1a
485	GSSPFG00030628001-RA	GSSPFG00030628001-RA_210861-211314	scaffold_9429_17752	3	9	38999	1a	x	1a
486	GSSPFG00015316001-RA	GSSPFG00015316001-RA_30957-31748	scaffold_9429_17752	12	18	39182	m8	x	m8
487	GSSPFG00019222001-RA	GSSPFG00019222001-RA_138334-139372	scaffold_9429_17752	505	511	39306	1a	x	1a
488	GSSPFG00026749001-RA	GSSPFG00026749001-RA_21621-22655	scaffold_9429_17752	543	549	39352	1a	x	1a
489	GSSPFG00008074001-RA	GSSPFG00008074001-RA_34120-35756	scaffold_9429_17752	1453	1459	39386	m8	x	m8
490	GSSPFG00017265001-RA	GSSPFG00017265001-RA_22864-23582	scaffold_9429_17752	16	22	39462	1a	x	1a
491	GSSPFG00017265001-RA	GSSPFG00017265001-RA_22864-23582	scaffold_9429_17752	314	320	39463	m8	x	m8
492	GSSPFG00033401001-RA	GSSPFG00033401001-RA_39934-41182	scaffold_9429_17752	1221	1227	39495	m8	x	m8
493	GSSPFG00016824001-RA	GSSPFG00016824001-RA_804-1473	scaffold_9429_17752	71	77	39520	1a	x	1a
494	GSSPFG00006529001-RA	GSSPFG00006529001-RA_5326-6568	scaffold_9429_17752	460	466	39653	1a	x	1a
495	GSSPFG00018424001-RA	GSSPFG00018424001-RA_65652-66265	scaffold_9429_17752	575	581	39664	m8	x	m8
496	GSSPFG00018424001-RA	GSSPFG00018424001-RA_65652-66265	scaffold_9429_17752	67	73	39665	1a	x	1a
497	GSSPFG00003354001-RA	GSSPFG00003354001-RA_43671-44254	scaffold_9429_17752	446	452	39689	m8	x	m8
498	GSSPFG00006356001-RA	GSSPFG00006356001-RA_111563-112154	scaffold_9429_17752	135	141	39712	m8	x	m8
499	GSSPFG00001285001-RA	GSSPFG00001285001-RA_93720-94859	scaffold_9429_17752	843	849	39736	m8	x	m8
500	GSSPFG00013617001-RA	GSSPFG00013617001-RA_43505-44726	scaffold_9429_17752	44	50	39854	1a	x	1a
501	GSSPFG00023085001-RA	GSSPFG00023085001-RA_54916-55135	scaffold_9429_17752	204	210	39931	m8	x	m8
502	GSSPFG00017344001-RA	GSSPFG00017344001-RA_172091-173444	scaffold_9429_17752	470	476	39965	1a	x	1a
503	GSSPFG00030555001-RA	GSSPFG00030555001-RA_129070-130688	scaffold_9429_17752	1071	1077	40007	m8	x	m8
504	GSSPFG00018787001-RA	GSSPFG00018787001-RA_1211-2139	scaffold_9429_17752	211	217	40036	1a	x	1a
505	GSSPFG00000598001-RA	GSSPFG00000598001-RA_14305-14720	scaffold_9429_17752	297	303	40378	1a	x	1a
506	GSSPFG00029361001-RA	GSSPFG00029361001-RA_25840-26103	scaffold_9429_17752	109	115	40479	1a	x	1a
507	GSSPFG00011831001-RA	GSSPFG00011831001-RA_100617-101418	scaffold_9429_17752	49	55	40618	1a	x	1a
508	GSSPFG00019941001-RA	GSSPFG00019941001-RA_92690-94297	scaffold_9429_17752	1070	1076	40683	8mer	x	8mer
509	GSSPFG00012953001-RA	GSSPFG00012953001-RA_70391-71679	scaffold_9429_17752	1003	1009	40791	1a	x	1a
510	GSSPFG00012953001-RA	GSSPFG00012953001-RA_70391-71679	scaffold_9429_17752	1134	1140	40792	1a	x	1a
511	GSSPFG00017686001-RA	GSSPFG00017686001-RA_4973-6193	scaffold_9429_17752	268	274	40900	8mer	x	8mer
512	GSSPFG00003249001-RA	GSSPFG00003249001-RA_35527-35933	scaffold_9429_17752	210	216	40958	m8	x	m8
513	GSSPFG00021688001-RA	GSSPFG00021688001-RA_23505-24239	scaffold_9429_17752	496	502	41004	8mer	x	8mer
514	GSSPFG00010243001-RA	GSSPFG00010243001-RA_91507-93015	scaffold_9429_17752	1147	1153	41050	m8	x	m8
515	GSSPFG00010243001-RA	GSSPFG00010243001-RA_91507-93015	scaffold_9429_17752	1315	1321	41051	1a	x	1a
516	GSSPFG00017082001-RA	GSSPFG00017082001-RA_343328-344218	scaffold_9429_17752	146	152	41283	8mer	x	8mer
517	GSSPFG00027476001-RA	GSSPFG00027476001-RA_62596-63120	scaffold_9429_17752	506	512	41291	m8	x	m8
518	GSSPFG00012556001-RA	GSSPFG00012556001-RA_264857-266002	scaffold_9429_17752	526	532	41301	1a	x	1a
519	GSSPFG00012558001-RA	GSSPFG00012558001-RA_269672-270817	scaffold_9429_17752	526	532	41315	1a	x	1a
520	GSSPFG00003972001-RA	GSSPFG00003972001-RA_65209-66364	scaffold_9429_17752	1146	1152	41358	1a	x	1a
521	GSSPFG00000220001-RA	GSSPFG00000220001-RA_129055-130062	scaffold_9429_17752	168	174	41506	8mer	x	8mer
522	GSSPFG00006918001.3-RA	GSSPFG00006918001.3-RA_10417-11265	scaffold_9429_17752	566	572	41892	8mer	x	8mer
523	GSSPFG00034486001-RA	GSSPFG00034486001-RA_536351-537326	scaffold_9429_17752	24	30	41926	8mer	x	8mer
524	GSSPFG00027141001-RA	GSSPFG00027141001-RA_6556-7297	scaffold_9429_17752	450	456	42084	1a	x	1a
miR998
Row	Gene_ID	Gene_ID
1	GSSPFG00034602001.3-RA	GSSPFG00034602001.3-RA_370938-372821	scaffold_602_5270	1353	1359	45	m8	x	m8
2	GSSPFG00022255001-RA	GSSPFG00022255001-RA_236734-236926	scaffold_602_5270	41	47	545	m8	x	m8
3	GSSPFG00033209001-RA	GSSPFG00033209001-RA_46665-46878	scaffold_602_5270	180	186	714	m8	x	m8
4	GSSPFG00011190001-RA	GSSPFG00011190001-RA_6901-7929	scaffold_602_5270	445	451	838	8mer	x	8mer
5	GSSPFG00013816001-RA	GSSPFG00013816001-RA_4131-4172	scaffold_602_5270	23	29	1210	1a	x	1a
6	GSSPFG00008559001-RA	GSSPFG00008559001-RA_41981-42173	scaffold_602_5270	41	47	1246	m8	x	m8
7	GSSPFG00022887001-RA	GSSPFG00022887001-RA_213-1486	scaffold_602_5270	917	923	1254	8mer	x	8mer
8	GSSPFG00032940001-RA	GSSPFG00032940001-RA_6742-8088	scaffold_602_5270	71	77	1471	m8	x	m8
9	GSSPFG00018166001-RA	GSSPFG00018166001-RA_11134-12482	scaffold_602_5270	976	982	1792	1a	x	1a
10	GSSPFG00006183001-RA	GSSPFG00006183001-RA_4272-6083	scaffold_602_5270	399	405	2174	m8	x	m8
11	GSSPFG00007777001.2-RA	GSSPFG00007777001.2-RA_4467-5882	scaffold_602_5270	688	694	2239	8mer	x	8mer
12	GSSPFG00028055001-RA	GSSPFG00028055001-RA_2830-3408	scaffold_602_5270	501	507	2258	8mer	x	8mer
13	GSSPFG00011597001-RA	GSSPFG00011597001-RA_58182-59347	scaffold_602_5270	647	653	2543	m8	x	m8
14	GSSPFG00011597001-RA	GSSPFG00011597001-RA_58182-59347	scaffold_602_5270	836	842	2544	m8	x	m8
15	GSSPFG00017947001-RA	GSSPFG00017947001-RA_7299-8741	scaffold_602_5270	1189	1195	2772	m8	x	m8
16	GSSPFG00014707001-RA	GSSPFG00014707001-RA_46586-46896	scaffold_602_5270	66	72	3029	1a	x	1a
17	GSSPFG00014708001-RA	GSSPFG00014708001-RA_53958-54984	scaffold_602_5270	66	72	3047	1a	x	1a
18	GSSPFG00007390001.2-RA	GSSPFG00007390001.2-RA_3340-3588	scaffold_602_5270	43	49	3115	m8	x	m8
19	GSSPFG00015506001-RA	GSSPFG00015506001-RA_239-891	scaffold_602_5270	478	484	3225	m8	x	m8
20	GSSPFG00006960001-RA	GSSPFG00006960001-RA_8891-9280	scaffold_602_5270	322	328	3457	m8	x	m8
21	GSSPFG00016574001-RA	GSSPFG00016574001-RA_4895-5534	scaffold_602_5270	563	569	3485	1a	x	1a
22	GSSPFG00025526001-RA	GSSPFG00025526001-RA_4594-5871	scaffold_602_5270	679	685	3615	m8	x	m8
23	GSSPFG00025526001-RA	GSSPFG00025526001-RA_4594-5871	scaffold_602_5270	765	771	3616	1a	x	1a
24	GSSPFG00022443001.3-RA	GSSPFG00022443001.3-RA_4359-4916	scaffold_602_5270	232	238	3695	m8	x	m8
25	GSSPFG00024975001-RA	GSSPFG00024975001-RA_5463-6252	scaffold_602_5270	122	128	3922	1a	x	1a
26	GSSPFG00024975001-RA	GSSPFG00024975001-RA_5463-6252	scaffold_602_5270	187	193	3923	8mer	x	8mer
27	GSSPFG00024975001-RA	GSSPFG00024975001-RA_5463-6252	scaffold_602_5270	563	569	3924	m8	x	m8
28	GSSPFG00005141001-RA	GSSPFG00005141001-RA_42266-43273	scaffold_602_5270	796	802	4163	1a	x	1a
29	GSSPFG00004597001-RA	GSSPFG00004597001-RA_33982-35362	scaffold_602_5270	1192	1198	4403	8mer	x	8mer
30	GSSPFG00003153001-RA	GSSPFG00003153001-RA_5658-6917	scaffold_602_5270	815	821	4560	m8	x	m8
31	GSSPFG00013099001-RA	GSSPFG00013099001-RA_44818-46681	scaffold_602_5270	1502	1508	4813	m8	x	m8
32	GSSPFG00014037001-RA	GSSPFG00014037001-RA_14307-14511	scaffold_602_5270	194	200	4903	m8	x	m8
33	GSSPFG00030351001-RA	GSSPFG00030351001-RA_204-983	scaffold_602_5270	537	543	4925	m8	x	m8
34	GSSPFG00012190001-RA	GSSPFG00012190001-RA_16037-17479	scaffold_602_5270	1124	1130	5145	8mer	x	8mer
35	GSSPFG00003067001-RA	GSSPFG00003067001-RA_778-1769	scaffold_602_5270	1	7	5159	1a	x	1a
36	GSSPFG00026864001-RA	GSSPFG00026864001-RA_4102-4432	scaffold_602_5270	198	204	5225	8mer	x	8mer
37	GSSPFG00011689001-RA	GSSPFG00011689001-RA_31913-33304	scaffold_602_5270	1125	1131	5493	8mer	x	8mer
38	GSSPFG00011689001-RA	GSSPFG00011689001-RA_31913-33304	scaffold_602_5270	202	208	5494	m8	x	m8
39	GSSPFG00011689001-RA	GSSPFG00011689001-RA_31913-33304	scaffold_602_5270	617	623	5495	1a	x	1a
40	GSSPFG00030102001.2-RA	GSSPFG00030102001.2-RA_3067-3868	scaffold_602_5270	706	712	5649	1a	x	1a
41	GSSPFG00021124001-RA	GSSPFG00021124001-RA_847-1142	scaffold_602_5270	246	252	5673	8mer	x	8mer
42	GSSPFG00001338001-RA	GSSPFG00001338001-RA_61697-65897	scaffold_602_5270	1047	1053	5904	1a	x	1a
43	GSSPFG00001338001-RA	GSSPFG00001338001-RA_61697-65897	scaffold_602_5270	453	459	5905	m8	x	m8
44	GSSPFG00000132001-RA	GSSPFG00000132001-RA_82860-84114	scaffold_602_5270	512	518	6218	m8	x	m8
45	GSSPFG00028010001-RA	GSSPFG00028010001-RA_3904-4624	scaffold_602_5270	51	57	6580	8mer	x	8mer
46	GSSPFG00033327001-RA	GSSPFG00033327001-RA_2971-4387	scaffold_602_5270	88	94	6625	m8	x	m8
47	GSSPFG00016959001-RA	GSSPFG00016959001-RA_297-1238	scaffold_602_5270	24	30	6825	1a	x	1a
48	GSSPFG00026810001-RA	GSSPFG00026810001-RA_45693-46359	scaffold_602_5270	548	554	6906	1a	x	1a
49	GSSPFG00024501001-RA	GSSPFG00024501001-RA_64769-65155	scaffold_602_5270	235	241	6963	1a	x	1a
50	GSSPFG00006300001-RA	GSSPFG00006300001-RA_3621-4961	scaffold_602_5270	624	630	6972	m8	x	m8
51	GSSPFG00015765001-RA	GSSPFG00015765001-RA_3679-4123	scaffold_602_5270	259	265	7078	8mer	x	8mer
52	GSSPFG00033356001-RA	GSSPFG00033356001-RA_28799-30028	scaffold_602_5270	829	835	7103	1a	x	1a
53	GSSPFG00031804001-RA	GSSPFG00031804001-RA_60665-61470	scaffold_602_5270	84	90	7929	m8	x	m8
54	GSSPFG00006585001-RA	GSSPFG00006585001-RA_9011-9203	scaffold_602_5270	41	47	8261	m8	x	m8
55	GSSPFG00021745001-RA	GSSPFG00021745001-RA_3118-4169	scaffold_602_5270	304	310	8290	8mer	x	8mer
56	GSSPFG00025280001-RA	GSSPFG00025280001-RA_2437-4002	scaffold_602_5270	574	580	8380	m8	x	m8
57	GSSPFG00028498001-RA	GSSPFG00028498001-RA_187380-188475	scaffold_602_5270	1014	1020	8521	m8	x	m8
58	GSSPFG00000504001-RA	GSSPFG00000504001-RA_188415-189452	scaffold_602_5270	920	926	8622	1a	x	1a
59	GSSPFG00029403001-RA	GSSPFG00029403001-RA_2382-2552	scaffold_602_5270	58	64	9019	1a	x	1a
60	GSSPFG00035183001.3-RA	GSSPFG00035183001.3-RA_1727-4410	scaffold_602_5270	759	765	9554	1a	x	1a
61	GSSPFG00006594001-RA	GSSPFG00006594001-RA_2789-3827	scaffold_602_5270	110	116	9818	m8	x	m8
62	GSSPFG00016303001-RA	GSSPFG00016303001-RA_2339-2746	scaffold_602_5270	175	181	9867	m8	x	m8
63	GSSPFG00018204001-RA	GSSPFG00018204001-RA_2018-3511	scaffold_602_5270	1043	1049	10468	1a	x	1a
64	GSSPFG00018204001-RA	GSSPFG00018204001-RA_2018-3511	scaffold_602_5270	17	23	10469	m8	x	m8
65	GSSPFG00007838001-RA	GSSPFG00007838001-RA_1901-3192	scaffold_602_5270	424	430	10502	8mer	x	8mer
66	GSSPFG00016344001-RA	GSSPFG00016344001-RA_48249-49012	scaffold_602_5270	334	340	10658	m8	x	m8
67	GSSPFG00030297001-RA	GSSPFG00030297001-RA_1727-2160	scaffold_602_5270	49	55	10986	8mer	x	8mer
68	GSSPFG00008156001-RA	GSSPFG00008156001-RA_242-1066	scaffold_602_5270	29	35	11114	8mer	x	8mer
69	GSSPFG00018036001-RA	GSSPFG00018036001-RA_195312-196638	scaffold_602_5270	324	330	11352	8mer	x	8mer
70	GSSPFG00025780001-RA	GSSPFG00025780001-RA_38945-40049	scaffold_602_5270	873	879	11585	8mer	x	8mer
71	GSSPFG00008529001-RA	GSSPFG00008529001-RA_38949-39287	scaffold_602_5270	194	200	11836	1a	x	1a
72	GSSPFG00028910001-RA	GSSPFG00028910001-RA_2862-3321	scaffold_602_5270	45	51	12086	m8	x	m8
73	GSSPFG00027638001.2-RA	GSSPFG00027638001.2-RA_2687-3577	scaffold_602_5270	233	239	12163	m8	x	m8
74	GSSPFG00026869001-RA	GSSPFG00026869001-RA_21389-21886	scaffold_602_5270	278	284	12190	8mer	x	8mer
75	GSSPFG00005521001-RA	GSSPFG00005521001-RA_2199-2780	scaffold_602_5270	490	496	12310	m8	x	m8
76	GSSPFG00033081001-RA	GSSPFG00033081001-RA_368-1081	scaffold_602_5270	19	25	12417	1a	x	1a
77	GSSPFG00034421001-RA	GSSPFG00034421001-RA_20813-22033	scaffold_602_5270	931	937	12590	m8	x	m8
78	GSSPFG00033254001-RA	GSSPFG00033254001-RA_1313-2416	scaffold_602_5270	196	202	13288	m8	x	m8
79	GSSPFG00017067001-RA	GSSPFG00017067001-RA_98341-98725	scaffold_602_5270	41	47	13579	1a	x	1a
80	GSSPFG00019344001-RA	GSSPFG00019344001-RA_10761-11370	scaffold_602_5270	289	295	13623	8mer	x	8mer
81	GSSPFG00017800001-RA	GSSPFG00017800001-RA_141508-141787	scaffold_602_5270	187	193	13681	m8	x	m8
82	GSSPFG00007047001-RA	GSSPFG00007047001-RA_153292-154348	scaffold_602_5270	822	828	13728	m8	x	m8
83	GSSPFG00000927001-RA	GSSPFG00000927001-RA_6178-6825	scaffold_602_5270	319	325	13833	m8	x	m8
84	GSSPFG00010818001.3-RA	GSSPFG00010818001.3-RA_36577-38232	scaffold_602_5270	727	733	14031	8mer	x	8mer
85	GSSPFG00019879001-RA	GSSPFG00019879001-RA_17497-17689	scaffold_602_5270	41	47	14086	m8	x	m8
86	GSSPFG00001149001-RA	GSSPFG00001149001-RA_32544-33505	scaffold_602_5270	899	905	14432	m8	x	m8
87	GSSPFG00014398001-RA	GSSPFG00014398001-RA_33099-34305	scaffold_602_5270	517	523	14475	1a	x	1a
88	GSSPFG00002850001.3-RA	GSSPFG00002850001.3-RA_18475-23075	scaffold_602_5270	4047	4053	14656	m8	x	m8
89	GSSPFG00032934001-RA	GSSPFG00032934001-RA_1078-1324	scaffold_602_5270	78	84	14743	m8	x	m8
90	GSSPFG00030839001-RA	GSSPFG00030839001-RA_29873-30983	scaffold_602_5270	923	929	14840	8mer	x	8mer
91	GSSPFG00030477001.4-RA	GSSPFG00030477001.4-RA_19603-19826	scaffold_602_5270	18	24	15151	1a	x	1a
92	GSSPFG00007492001-RA	GSSPFG00007492001-RA_2470-3500	scaffold_602_5270	506	512	15314	m8	x	m8
93	GSSPFG00032718001-RA	GSSPFG00032718001-RA_1450-2138	scaffold_602_5270	541	547	15586	m8	x	m8
94	GSSPFG00016417001-RA	GSSPFG00016417001-RA_357307-358677	scaffold_602_5270	946	952	15739	m8	x	m8
95	GSSPFG00007258001-RA	GSSPFG00007258001-RA_1767-2529	scaffold_602_5270	372	378	15856	m8	x	m8
96	GSSPFG00002731001-RA	GSSPFG00002731001-RA_1229-2032	scaffold_602_5270	310	316	17041	m8	x	m8
97	GSSPFG00032925001-RA	GSSPFG00032925001-RA_341409-342552	scaffold_602_5270	653	659	17268	m8	x	m8
98	GSSPFG00030265001-RA	GSSPFG00030265001-RA_29040-30412	scaffold_602_5270	213	219	17315	1a	x	1a
99	GSSPFG00017385001-RA	GSSPFG00017385001-RA_1007-1981	scaffold_602_5270	396	402	17677	m8	x	m8
100	GSSPFG00001902001-RA	GSSPFG00001902001-RA_10430-10937	scaffold_602_5270	241	247	17904	m8	x	m8
101	GSSPFG00000212001-RA	GSSPFG00000212001-RA_147220-147875	scaffold_602_5270	19	25	17952	8mer	x	8mer
102	GSSPFG00033707001-RA	GSSPFG00033707001-RA_5076-6212	scaffold_602_5270	591	597	18277	8mer	x	8mer
103	GSSPFG00032415001-RA	GSSPFG00032415001-RA_3642-4457	scaffold_602_5270	162	168	18978	m8	x	m8
104	GSSPFG00024155001-RA	GSSPFG00024155001-RA_2622-3374	scaffold_602_5270	472	478	19021	1a	x	1a
105	GSSPFG00025421001-RA	GSSPFG00025421001-RA_168609-169824	scaffold_602_5270	732	738	19107	1a	x	1a
106	GSSPFG00025432001-RA	GSSPFG00025432001-RA_269612-270710	scaffold_602_5270	922	928	19133	1a	x	1a
107	GSSPFG00023124001-RA	GSSPFG00023124001-RA_14147-15367	scaffold_602_5270	909	915	19428	8mer	x	8mer
108	GSSPFG00028769001-RA	GSSPFG00028769001-RA_11979-12779	scaffold_602_5270	118	124	19481	m8	x	m8
109	GSSPFG00014413001-RA	GSSPFG00014413001-RA_192501-193555	scaffold_602_5270	607	613	19514	8mer	x	8mer
110	GSSPFG00027017001-RA	GSSPFG00027017001-RA_116320-116512	scaffold_602_5270	41	47	19548	m8	x	m8
111	GSSPFG00018171001-RA	GSSPFG00018171001-RA_60730-60909	scaffold_602_5270	87	93	19829	m8	x	m8
112	GSSPFG00023681001-RA	GSSPFG00023681001-RA_8471-10024	scaffold_602_5270	229	235	20285	8mer	x	8mer
113	GSSPFG00005193001-RA	GSSPFG00005193001-RA_5017-6196	scaffold_602_5270	400	406	20340	1a	x	1a
114	GSSPFG00009919001-RA	GSSPFG00009919001-RA_12578-12874	scaffold_602_5270	140	146	20397	m8	x	m8
115	GSSPFG00029688001-RA	GSSPFG00029688001-RA_205-1107	scaffold_602_5270	715	721	20685	1a	x	1a
116	GSSPFG00018873001-RA	GSSPFG00018873001-RA_756-1548	scaffold_602_5270	280	286	20979	1a	x	1a
117	GSSPFG00015126001-RA	GSSPFG00015126001-RA_11617-12641	scaffold_602_5270	126	132	21167	8mer	x	8mer
118	GSSPFG00007268001-RA	GSSPFG00007268001-RA_17263-17775	scaffold_602_5270	478	484	21200	m8	x	m8
119	GSSPFG00019690001-RA	GSSPFG00019690001-RA_13574-13948	scaffold_602_5270	27	33	21221	8mer	x	8mer
120	GSSPFG00006843001-RA	GSSPFG00006843001-RA_36159-37152	scaffold_602_5270	26	32	21737	1a	x	1a
121	GSSPFG00000633001-RA	GSSPFG00000633001-RA_19077-20116	scaffold_602_5270	319	325	21769	m8	x	m8
122	GSSPFG00015181001-RA	GSSPFG00015181001-RA_122959-124117	scaffold_602_5270	151	157	21829	1a	x	1a
123	GSSPFG00019022001-RA	GSSPFG00019022001-RA_17185-18645	scaffold_602_5270	270	276	22058	8mer	x	8mer
124	GSSPFG00000370001-RA	GSSPFG00000370001-RA_13368-14398	scaffold_602_5270	821	827	22355	8mer	x	8mer
125	GSSPFG00030448001-RA	GSSPFG00030448001-RA_5560-6748	scaffold_602_5270	781	787	22521	m8	x	m8
126	GSSPFG00010092001-RA	GSSPFG00010092001-RA_97325-98262	scaffold_602_5270	10	16	22692	1a	x	1a
127	GSSPFG00000334001-RA	GSSPFG00000334001-RA_126914-127106	scaffold_602_5270	41	47	22846	m8	x	m8
128	GSSPFG00032584001-RA	GSSPFG00032584001-RA_67640-69594	scaffold_602_5270	984	990	23518	m8	x	m8
129	GSSPFG00030856001-RA	GSSPFG00030856001-RA_16844-17552	scaffold_602_5270	633	639	23577	1a	x	1a
130	GSSPFG00008471001.3-RA	GSSPFG00008471001.3-RA_3408-3910	scaffold_602_5270	26	32	23681	1a	x	1a
131	GSSPFG00007737001-RA	GSSPFG00007737001-RA_211-1218	scaffold_602_5270	893	899	24322	m8	x	m8
132	GSSPFG00008368001-RA	GSSPFG00008368001-RA_12003-13347	scaffold_602_5270	701	707	24367	1a	x	1a
133	GSSPFG00025017001-RA	GSSPFG00025017001-RA_121393-122205	scaffold_602_5270	247	253	24389	8mer	x	8mer
134	GSSPFG00019603001.2-RF	GSSPFG00019603001.2-RF_5070-5375	scaffold_602_5270	62	68	24463	8mer	x	8mer
135	GSSPFG00019603001.2-RC	GSSPFG00019603001.2-RC_5076-5375	scaffold_602_5270	62	68	24468	8mer	x	8mer
136	GSSPFG00012278001-RA	GSSPFG00012278001-RA_112721-113836	scaffold_602_5270	484	490	24682	1a	x	1a
137	GSSPFG00000240001-RA	GSSPFG00000240001-RA_9733-10313	scaffold_602_5270	113	119	24720	m8	x	m8
138	GSSPFG00000240001-RA	GSSPFG00000240001-RA_9733-10313	scaffold_602_5270	195	201	24721	m8	x	m8
139	GSSPFG00000240001-RA	GSSPFG00000240001-RA_9733-10313	scaffold_602_5270	334	340	24722	8mer	x	8mer
140	GSSPFG00022466001-RA	GSSPFG00022466001-RA_7689-8004	scaffold_602_5270	285	291	25155	1a	x	1a
141	GSSPFG00035508001.5-RA	GSSPFG00035508001.5-RA_143902-144012	scaffold_602_5270	32	38	25226	1a	x	1a
142	GSSPFG00018939001-RA	GSSPFG00018939001-RA_234157-234848	scaffold_602_5270	196	202	25236	m8	x	m8
143	GSSPFG00018939001-RA	GSSPFG00018939001-RA_234157-234848	scaffold_602_5270	670	676	25237	m8	x	m8
144	GSSPFG00020002001-RA	GSSPFG00020002001-RA_871-1495	scaffold_602_5270	1	7	25473	8mer	x	8mer
145	GSSPFG00033825001-RA	GSSPFG00033825001-RA_85402-85634	scaffold_602_5270	22	28	25847	m8	x	m8
146	GSSPFG00005178001-RA	GSSPFG00005178001-RA_2829-3375	scaffold_602_5270	487	493	25978	m8	x	m8
147	GSSPFG00019383001-RA	GSSPFG00019383001-RA_68780-70057	scaffold_602_5270	930	936	26023	m8	x	m8
148	GSSPFG00024669001-RA	GSSPFG00024669001-RA_6679-7744	scaffold_602_5270	104	110	26074	1a	x	1a
149	GSSPFG00010279001-RA	GSSPFG00010279001-RA_62775-64118	scaffold_602_5270	168	174	26249	m8	x	m8
150	GSSPFG00010282001-RA	GSSPFG00010282001-RA_77570-78872	scaffold_602_5270	759	765	26259	1a	x	1a
151	GSSPFG00033001001.3-RA	GSSPFG00033001001.3-RA_6703-7261	scaffold_602_5270	65	71	26741	1a	x	1a
152	GSSPFG00003012001-RA	GSSPFG00003012001-RA_7795-9001	scaffold_602_5270	320	326	26873	8mer	x	8mer
153	GSSPFG00006247001-RA	GSSPFG00006247001-RA_30874-31887	scaffold_602_5270	960	966	26987	1a	x	1a
154	GSSPFG00001404001-RA	GSSPFG00001404001-RA_7683-8679	scaffold_602_5270	692	698	27213	m8	x	m8
155	GSSPFG00026329001-RA	GSSPFG00026329001-RA_8805-10504	scaffold_602_5270	1691	1697	27593	1a	x	1a
156	GSSPFG00013012001-RA	GSSPFG00013012001-RA_7986-8546	scaffold_602_5270	55	61	27795	8mer	x	8mer
157	GSSPFG00020324001-RA	GSSPFG00020324001-RA_2308-3573	scaffold_602_5270	965	971	27856	1a	x	1a
158	GSSPFG00009539001-RA	GSSPFG00009539001-RA_253879-255496	scaffold_602_5270	390	396	28617	m8	x	m8
159	GSSPFG00010924001-RA	GSSPFG00010924001-RA_10655-10945	scaffold_602_5270	265	271	28935	1a	x	1a
160	GSSPFG00026142001-RA	GSSPFG00026142001-RA_11289-12389	scaffold_602_5270	5	11	29139	8mer	x	8mer
161	GSSPFG00007904001-RA	GSSPFG00007904001-RA_9122-10358	scaffold_602_5270	580	586	29176	m8	x	m8
162	GSSPFG00032870001-RA	GSSPFG00032870001-RA_9532-10583	scaffold_602_5270	695	701	29444	8mer	x	8mer
163	GSSPFG00012840001-RA	GSSPFG00012840001-RA_3205-3432	scaffold_602_5270	15	21	29574	1a	x	1a
164	GSSPFG00014881001-RA	GSSPFG00014881001-RA_6041-7084	scaffold_602_5270	426	432	29609	8mer	x	8mer
165	GSSPFG00020808001.3-RA	GSSPFG00020808001.3-RA_129025-133664	scaffold_602_5270	4094	4100	29734	m8	x	m8
166	GSSPFG00005836001.1-RA	GSSPFG00005836001.1-RA_9597-10617	scaffold_602_5270	561	567	30071	1a	x	1a
167	GSSPFG00008993001-RA	GSSPFG00008993001-RA_233978-234062	scaffold_602_5270	29	35	30382	8mer	x	8mer
168	GSSPFG00009831001.2-RB	GSSPFG00009831001.2-RB_38803-39000	scaffold_602_5270	89	95	30405	1a	x	1a
169	GSSPFG00033091001-RA	GSSPFG00033091001-RA_4531-4754	scaffold_602_5270	172	178	30434	m8	x	m8
170	GSSPFG00026400001.2-RA	GSSPFG00026400001.2-RA_5108-6311	scaffold_602_5270	45	51	30939	8mer	x	8mer
171	GSSPFG00020707001-RA	GSSPFG00020707001-RA_3834-4026	scaffold_602_5270	87	93	31088	8mer	x	8mer
172	GSSPFG00017075001-RA	GSSPFG00017075001-RA_8571-9783	scaffold_602_5270	380	386	31191	m8	x	m8
173	GSSPFG00002079001-RA	GSSPFG00002079001-RA_12974-13290	scaffold_602_5270	69	75	31201	m8	x	m8
174	GSSPFG00022306001-RA	GSSPFG00022306001-RA_86294-87519	scaffold_602_5270	990	996	31421	8mer	x	8mer
175	GSSPFG00011364001-RA	GSSPFG00011364001-RA_5233-6476	scaffold_602_5270	642	648	31608	1a	x	1a
176	GSSPFG00004262001-RA	GSSPFG00004262001-RA_4685-5607	scaffold_602_5270	759	765	31825	1a	x	1a
177	GSSPFG00005411001-RA	GSSPFG00005411001-RA_160850-162567	scaffold_602_5270	1643	1649	32062	8mer	x	8mer
178	GSSPFG00005411001-RA	GSSPFG00005411001-RA_160850-162567	scaffold_602_5270	356	362	32063	8mer	x	8mer
179	GSSPFG00010564001-RA	GSSPFG00010564001-RA_50263-51425	scaffold_602_5270	809	815	32268	1a	x	1a
180	GSSPFG00026627001-RA	GSSPFG00026627001-RA_37157-37573	scaffold_602_5270	236	242	32404	1a	x	1a
181	GSSPFG00012989001-RA	GSSPFG00012989001-RA_215231-216179	scaffold_602_5270	259	265	32481	m8	x	m8
182	GSSPFG00028185001-RA	GSSPFG00028185001-RA_10257-10865	scaffold_602_5270	175	181	32763	8mer	x	8mer
183	GSSPFG00020030001.2-RA	GSSPFG00020030001.2-RA_309924-311022	scaffold_602_5270	441	447	32990	m8	x	m8
184	GSSPFG00008451001-RA	GSSPFG00008451001-RA_68739-70510	scaffold_602_5270	297	303	33107	m8	x	m8
185	GSSPFG00007545001.4-RA	GSSPFG00007545001.4-RA_33323-35176	scaffold_602_5270	1320	1326	33478	8mer	x	8mer
186	GSSPFG00007545001.4-RB	GSSPFG00007545001.4-RB_33323-35176	scaffold_602_5270	1320	1326	33512	8mer	x	8mer
187	GSSPFG00005491001-RA	GSSPFG00005491001-RA_115273-116544	scaffold_602_5270	4	10	33626	1a	x	1a
188	GSSPFG00013308001-RA	GSSPFG00013308001-RA_118719-119773	scaffold_602_5270	607	613	33691	8mer	x	8mer
189	GSSPFG00023650001-RA	GSSPFG00023650001-RA_35072-36320	scaffold_602_5270	199	205	33745	m8	x	m8
190	GSSPFG00034151001-RA	GSSPFG00034151001-RA_258417-258733	scaffold_602_5270	253	259	34240	1a	x	1a
191	GSSPFG00014144001.3-RA	GSSPFG00014144001.3-RA_38239-38741	scaffold_602_5270	222	228	34292	8mer	x	8mer
192	GSSPFG00031518001-RA	GSSPFG00031518001-RA_86497-87521	scaffold_602_5270	435	441	34367	8mer	x	8mer
193	GSSPFG00034760001.3-RA	GSSPFG00034760001.3-RA_424794-425467	scaffold_602_5270	110	116	34619	m8	x	m8
194	GSSPFG00011611001-RA	GSSPFG00011611001-RA_46464-46742	scaffold_602_5270	103	109	34808	m8	x	m8
195	GSSPFG00024065001-RA	GSSPFG00024065001-RA_84979-85171	scaffold_602_5270	41	47	34867	m8	x	m8
196	GSSPFG00016392001.3-RA	GSSPFG00016392001.3-RA_163587-165088	scaffold_602_5270	225	231	35527	8mer	x	8mer
197	GSSPFG00019595001-RA	GSSPFG00019595001-RA_15406-15598	scaffold_602_5270	41	47	35633	m8	x	m8
198	GSSPFG00002719001-RA	GSSPFG00002719001-RA_67085-67697	scaffold_602_5270	41	47	35668	m8	x	m8
199	GSSPFG00014533001-RA	GSSPFG00014533001-RA_19826-20009	scaffold_602_5270	162	168	35708	1a	x	1a
200	GSSPFG00007821001-RA	GSSPFG00007821001-RA_117257-118164	scaffold_602_5270	350	356	35836	m8	x	m8
201	GSSPFG00019840001-RA	GSSPFG00019840001-RA_4641-5540	scaffold_602_5270	787	793	36106	m8	x	m8
202	GSSPFG00009074001-RA	GSSPFG00009074001-RA_75438-76193	scaffold_602_5270	272	278	36377	1a	x	1a
203	GSSPFG00011705001-RA	GSSPFG00011705001-RA_258353-258957	scaffold_602_5270	66	72	36427	m8	x	m8
204	GSSPFG00011708001-RA	GSSPFG00011708001-RA_269781-270740	scaffold_602_5270	564	570	36443	m8	x	m8
205	GSSPFG00026523001-RA	GSSPFG00026523001-RA_305550-306073	scaffold_602_5270	367	373	36519	8mer	x	8mer
206	GSSPFG00015754001-RA	GSSPFG00015754001-RA_73920-75392	scaffold_602_5270	202	208	36683	m8	x	m8
207	GSSPFG00023523001-RA	GSSPFG00023523001-RA_343358-344064	scaffold_602_5270	567	573	36689	m8	x	m8
208	GSSPFG00034063001-RA	GSSPFG00034063001-RA_131979-133108	scaffold_602_5270	761	767	36781	8mer	x	8mer
209	GSSPFG00032673001-RA	GSSPFG00032673001-RA_119556-120095	scaffold_602_5270	465	471	37290	8mer	x	8mer
210	GSSPFG00004454001-RA	GSSPFG00004454001-RA_70252-70524	scaffold_602_5270	165	171	37446	8mer	x	8mer
211	GSSPFG00007350001-RA	GSSPFG00007350001-RA_281499-281869	scaffold_602_5270	248	254	37600	1a	x	1a
212	GSSPFG00025865001-RA	GSSPFG00025865001-RA_716-1889	scaffold_602_5270	816	822	37642	m8	x	m8
213	GSSPFG00017613001.3-RA	GSSPFG00017613001.3-RA_4737-19168	scaffold_602_5270	2395	2401	37714	8mer	x	8mer
214	GSSPFG00028077001-RA	GSSPFG00028077001-RA_330217-330661	scaffold_602_5270	56	62	37858	1a	x	1a
215	GSSPFG00011484001-RA	GSSPFG00011484001-RA_189580-190652	scaffold_602_5270	347	353	37923	8mer	x	8mer
216	GSSPFG00014328001-RA	GSSPFG00014328001-RA_138368-138660	scaffold_602_5270	18	24	38639	m8	x	m8
217	GSSPFG00030651001-RA	GSSPFG00030651001-RA_331228-331656	scaffold_602_5270	266	272	39114	1a	x	1a
218	GSSPFG00012929001-RA	GSSPFG00012929001-RA_60248-60687	scaffold_602_5270	214	220	39130	m8	x	m8
219	GSSPFG00033104001-RA	GSSPFG00033104001-RA_4586-6196	scaffold_602_5270	731	737	39173	m8	x	m8
220	GSSPFG00012629001-RA	GSSPFG00012629001-RA_63571-63959	scaffold_602_5270	49	55	39201	1a	x	1a
221	GSSPFG00015738001-RA	GSSPFG00015738001-RA_131260-131978	scaffold_602_5270	352	358	39838	1a	x	1a
222	GSSPFG00028857001-RA	GSSPFG00028857001-RA_33848-34242	scaffold_602_5270	117	123	40118	1a	x	1a
223	GSSPFG00027248001-RA	GSSPFG00027248001-RA_370995-371516	scaffold_602_5270	73	79	40131	8mer	x	8mer
224	GSSPFG00014495001-RA	GSSPFG00014495001-RA_42225-42430	scaffold_602_5270	195	201	40242	m8	x	m8
225	GSSPFG00001022001-RA	GSSPFG00001022001-RA_39846-41209	scaffold_602_5270	1059	1065	40291	1a	x	1a
226	GSSPFG00004437001-RA	GSSPFG00004437001-RA_14284-15251	scaffold_602_5270	269	275	40697	8mer	x	8mer
227	GSSPFG00000228001.2-RB	GSSPFG00000228001.2-RB_39671-42734	scaffold_602_5270	498	504	41421	1a	x	1a
228	GSSPFG00000230001-RA	GSSPFG00000230001-RA_45934-47116	scaffold_602_5270	1114	1120	41449	8mer	x	8mer
229	GSSPFG00025360001-RA	GSSPFG00025360001-RA_67522-69038	scaffold_602_5270	1090	1096	42063	m8	x	m8
230	GSSPFG00016361001-RA	GSSPFG00016361001-RA_368508-369022	scaffold_602_5270	505	511	42153	m8	x	m8
miR278
Row	Gene_ID
1	GSSPFG00004305001-RA	GSSPFG00004305001-RA_2960-3928	superscaffold_1_28353	774	780	16	1a	x	1a
2	GSSPFG00010631001-RA	GSSPFG00010631001-RA_6553-7112	superscaffold_1_28353	265	271	279	m8	x	m8
3	GSSPFG00003312001-RA	GSSPFG00003312001-RA_2494-2748	superscaffold_1_28353	64	70	883	1a	x	1a
4	GSSPFG00025313001-RA	GSSPFG00025313001-RA_197914-198668	superscaffold_1_28353	366	372	1991	1a	x	1a
5	GSSPFG00017271001-RA	GSSPFG00017271001-RA_7362-8269	superscaffold_1_28353	799	805	2946	1a	x	1a
6	GSSPFG00018258001-RA	GSSPFG00018258001-RA_5611-7034	superscaffold_1_28353	517	523	3000	m8	x	m8
7	GSSPFG00015589001-RA	GSSPFG00015589001-RA_6342-7756	superscaffold_1_28353	406	412	3750	1a	x	1a
8	GSSPFG00018309001-RA	GSSPFG00018309001-RA_4684-5945	superscaffold_1_28353	108	114	3761	m8	x	m8
9	GSSPFG00019547001-RA	GSSPFG00019547001-RA_5264-6588	superscaffold_1_28353	235	241	3851	1a	x	1a
10	GSSPFG00022355001-RA	GSSPFG00022355001-RA_2390-2590	superscaffold_1_28353	148	154	4381	m8	x	m8
11	GSSPFG00035050001.2-RA	GSSPFG00035050001.2-RA_4808-7057	superscaffold_1_28353	867	873	4727	m8	x	m8
12	GSSPFG00018317001-RA	GSSPFG00018317001-RA_3228-4573	superscaffold_1_28353	321	327	5286	8mer	x	8mer
13	GSSPFG00021827001-RA	GSSPFG00021827001-RA_1999-3440	superscaffold_1_28353	858	864	5667	1a	x	1a
14	GSSPFG00008503001-RA	GSSPFG00008503001-RA_37277-38570	superscaffold_1_28353	1031	1037	5773	8mer	x	8mer
15	GSSPFG00012369001-RA	GSSPFG00012369001-RA_1287-2513	superscaffold_1_28353	437	443	5969	8mer	x	8mer
16	GSSPFG00012369001-RA	GSSPFG00012369001-RA_1287-2513	superscaffold_1_28353	446	452	5970	8mer	x	8mer
17	GSSPFG00012369001-RA	GSSPFG00012369001-RA_1287-2513	superscaffold_1_28353	455	461	5971	8mer	x	8mer
18	GSSPFG00013034001.3-RA	GSSPFG00013034001.3-RA_3203-4847	superscaffold_1_28353	1083	1089	6572	1a	x	1a
19	GSSPFG00006155001-RA	GSSPFG00006155001-RA_428743-429572	superscaffold_1_28353	618	624	6764	1a	x	1a
20	GSSPFG00031549001-RA	GSSPFG00031549001-RA_192963-193963	superscaffold_1_28353	283	289	7304	1a	x	1a
21	GSSPFG00005453001-RA	GSSPFG00005453001-RA_3826-5080	superscaffold_1_28353	982	988	7318	1a	x	1a
22	GSSPFG00004887001-RA	GSSPFG00004887001-RA_2247-2462	superscaffold_1_28353	14	20	8074	m8	x	m8
23	GSSPFG00001896001-RA	GSSPFG00001896001-RA_1290-1580	superscaffold_1_28353	106	112	8102	m8	x	m8
24	GSSPFG00028760001-RA	GSSPFG00028760001-RA_1827-2716	superscaffold_1_28353	484	490	8303	1a	x	1a
25	GSSPFG00011695001.3-RA	GSSPFG00011695001.3-RA_10515-11084	superscaffold_1_28353	153	159	9653	m8	x	m8
26	GSSPFG00020154001-RA	GSSPFG00020154001-RA_15028-16636	superscaffold_1_28353	534	540	9849	1a	x	1a
27	GSSPFG00004808001-RA	GSSPFG00004808001-RA_39321-40412	superscaffold_1_28353	161	167	10357	1a	x	1a
28	GSSPFG00014267001-RA	GSSPFG00014267001-RA_40219-41993	superscaffold_1_28353	6	12	10408	m8	x	m8
29	GSSPFG00019962001-RA	GSSPFG00019962001-RA_840-1901	superscaffold_1_28353	94	100	10576	m8	x	m8
30	GSSPFG00001247001-RA	GSSPFG00001247001-RA_108534-109781	superscaffold_1_28353	700	706	10980	m8	x	m8
31	GSSPFG00029432001-RA	GSSPFG00029432001-RA_35925-37480	superscaffold_1_28353	1397	1403	11766	m8	x	m8
32	GSSPFG00004976001-RA	GSSPFG00004976001-RA_358-1270	superscaffold_1_28353	364	370	11871	8mer	x	8mer
33	GSSPFG00021013001.3-RA	GSSPFG00021013001.3-RA_37464-38702	superscaffold_1_28353	443	449	12180	8mer	x	8mer
34	GSSPFG00021013001.3-RA	GSSPFG00021013001.3-RA_37464-38702	superscaffold_1_28353	452	458	12181	8mer	x	8mer
35	GSSPFG00025319001-RA	GSSPFG00025319001-RA_2721-3641	superscaffold_1_28353	259	265	12842	1a	x	1a
36	GSSPFG00031016001-RA	GSSPFG00031016001-RA_688-982	superscaffold_1_28353	184	190	13097	1a	x	1a
37	GSSPFG00031016001-RA	GSSPFG00031016001-RA_688-982	superscaffold_1_28353	27	33	13098	1a	x	1a
38	GSSPFG00017954001-RA	GSSPFG00017954001-RA_21337-22710	superscaffold_1_28353	940	946	13248	m8	x	m8
39	GSSPFG00005044001-RA	GSSPFG00005044001-RA_1645-1954	superscaffold_1_28353	239	245	14441	1a	x	1a
40	GSSPFG00020541001-RA	GSSPFG00020541001-RA_363622-363990	superscaffold_1_28353	13	19	15164	8mer	x	8mer
41	GSSPFG00015623001-RA	GSSPFG00015623001-RA_1306-2332	superscaffold_1_28353	724	730	16222	m8	x	m8
42	GSSPFG00027094001.3-RA	GSSPFG00027094001.3-RA_20859-22913	superscaffold_1_28353	185	191	16437	m8	x	m8
43	GSSPFG00031041001-RA	GSSPFG00031041001-RA_27911-28958	superscaffold_1_28353	635	641	16600	m8	x	m8
44	GSSPFG00004760001-RA	GSSPFG00004760001-RA_50219-51511	superscaffold_1_28353	642	648	16890	m8	x	m8
45	GSSPFG00004760001-RA	GSSPFG00004760001-RA_50219-51511	superscaffold_1_28353	655	661	16891	1a	x	1a
46	GSSPFG00032095001-RA	GSSPFG00032095001-RA_11567-11822	superscaffold_1_28353	82	88	16952	8mer	x	8mer
47	GSSPFG00011237001-RA	GSSPFG00011237001-RA_27315-28760	superscaffold_1_28353	1098	1104	17415	m8	x	m8
48	GSSPFG00011237001-RA	GSSPFG00011237001-RA_27315-28760	superscaffold_1_28353	973	979	17416	1a	x	1a
49	GSSPFG00001720001-RA	GSSPFG00001720001-RA_7150-8407	superscaffold_1_28353	69	75	17713	m8	x	m8
50	GSSPFG00030686001-RA	GSSPFG00030686001-RA_23424-23680	superscaffold_1_28353	131	137	18679	m8	x	m8
51	GSSPFG00034395001-RA	GSSPFG00034395001-RA_4221-4827	superscaffold_1_28353	455	461	19054	1a	x	1a
52	GSSPFG00017716001-RA	GSSPFG00017716001-RA_18620-19744	superscaffold_1_28353	460	466	20041	1a	x	1a
53	GSSPFG00002426001.3-RA	GSSPFG00002426001.3-RA_1145-3100	superscaffold_1_28353	49	55	20922	m8	x	m8
54	GSSPFG00026683001-RA	GSSPFG00026683001-RA_19962-21276	superscaffold_1_28353	80	86	21528	1a	x	1a
55	GSSPFG00032608001-RA	GSSPFG00032608001-RA_1574-2595	superscaffold_1_28353	441	447	22077	1a	x	1a
56	GSSPFG00033297001-RA	GSSPFG00033297001-RA_16992-17719	superscaffold_1_28353	327	333	22510	8mer	x	8mer
57	GSSPFG00009894001-RA	GSSPFG00009894001-RA_10209-11933	superscaffold_1_28353	1319	1325	23134	8mer	x	8mer
58	GSSPFG00017581001-RA	GSSPFG00017581001-RA_13656-14194	superscaffold_1_28353	207	213	24210	m8	x	m8
59	GSSPFG00020589001-RA	GSSPFG00020589001-RA_12337-13154	superscaffold_1_28353	743	749	24826	8mer	x	8mer
60	GSSPFG00003341001-RA	GSSPFG00003341001-RA_9589-10322	superscaffold_1_28353	358	364	26860	1a	x	1a
61	GSSPFG00004142001-RA	GSSPFG00004142001-RA_7120-8047	superscaffold_1_28353	190	196	27497	m8	x	m8
62	GSSPFG00026329001-RA	GSSPFG00026329001-RA_8805-10504	superscaffold_1_28353	1546	1552	27603	1a	x	1a
63	GSSPFG00016377001.3-RA	GSSPFG00016377001.3-RA_10360-10832	superscaffold_1_28353	316	322	27709	1a	x	1a
64	GSSPFG00017383001-RA	GSSPFG00017383001-RA_10799-11904	superscaffold_1_28353	339	345	28476	1a	x	1a
65	GSSPFG00032490001-RA	GSSPFG00032490001-RA_100878-102249	superscaffold_1_28353	384	390	28520	m8	x	m8
66	GSSPFG00019514001-RA	GSSPFG00019514001-RA_5115-6014	superscaffold_1_28353	890	896	28642	m8	x	m8
67	GSSPFG00020847001.3-RA	GSSPFG00020847001.3-RA_8153-10467	superscaffold_1_28353	327	333	29022	m8	x	m8
68	GSSPFG00005835001-RA	GSSPFG00005835001-RA_4908-5233	superscaffold_1_28353	108	114	30060	1a	x	1a
69	GSSPFG00017649001-RA	GSSPFG00017649001-RA_9467-10709	superscaffold_1_28353	1193	1199	30335	1a	x	1a
70	GSSPFG00016576001-RA	GSSPFG00016576001-RA_2275-3512	superscaffold_1_28353	379	385	31133	m8	x	m8
71	GSSPFG00015844001-RA	GSSPFG00015844001-RA_18827-20041	superscaffold_1_28353	1154	1160	31871	8mer	x	8mer
72	GSSPFG00005460001-RA	GSSPFG00005460001-RA_10572-11255	superscaffold_1_28353	608	614	31943	m8	x	m8
73	GSSPFG00005408001-RA	GSSPFG00005408001-RA_202088-207472	superscaffold_1_28353	333	339	32090	1a	x	1a
74	GSSPFG00030379001-RA	GSSPFG00030379001-RA_347095-347964	superscaffold_1_28353	201	207	32347	m8	x	m8
75	GSSPFG00008321001-RA	GSSPFG00008321001-RA_10768-11686	superscaffold_1_28353	170	176	32552	m8	x	m8
76	GSSPFG00018633001-RA	GSSPFG00018633001-RA_10232-11722	superscaffold_1_28353	72	78	32896	m8	x	m8
77	GSSPFG00010055001-RA	GSSPFG00010055001-RA_75553-76192	superscaffold_1_28353	359	365	33264	1a	x	1a
78	GSSPFG00027931001-RA	GSSPFG00027931001-RA_1466-2261	superscaffold_1_28353	173	179	34037	m8	x	m8
79	GSSPFG00010865001-RA	GSSPFG00010865001-RA_36063-36607	superscaffold_1_28353	133	139	34590	1a	x	1a
80	GSSPFG00034741001.2-RA	GSSPFG00034741001.2-RA_583800-587848	superscaffold_1_28353	1640	1646	34658	m8	x	m8
81	GSSPFG00032307001-RA	GSSPFG00032307001-RA_38166-38807	superscaffold_1_28353	134	140	34823	1a	x	1a
82	GSSPFG00011709001-RA	GSSPFG00011709001-RA_272503-273775	superscaffold_1_28353	1118	1124	36457	1a	x	1a
83	GSSPFG00034063001-RA	GSSPFG00034063001-RA_131979-133108	superscaffold_1_28353	938	944	36788	8mer	x	8mer
84	GSSPFG00006490001-RA	GSSPFG00006490001-RA_16646-18001	superscaffold_1_28353	33	39	37053	m8	x	m8
85	GSSPFG00026903001-RA	GSSPFG00026903001-RA_43475-44119	superscaffold_1_28353	420	426	37374	m8	x	m8
86	GSSPFG00012154001-RA	GSSPFG00012154001-RA_26797-27152	superscaffold_1_28353	89	95	38373	1a	x	1a
87	GSSPFG00033924001-RA	GSSPFG00033924001-RA_50983-52116	superscaffold_1_28353	805	811	38694	m8	x	m8
88	GSSPFG00025987001.2-RA	GSSPFG00025987001.2-RA_45680-46958	superscaffold_1_28353	59	65	39563	1a	x	1a
89	GSSPFG00014132001.3-RA	GSSPFG00014132001.3-RA_24978-28862	superscaffold_1_28353	2859	2865	40455	1a	x	1a
90	GSSPFG00016301001-RA	GSSPFG00016301001-RA_7216-7767	superscaffold_1_28353	322	328	40827	m8	x	m8
91	GSSPFG00028563001-RA	GSSPFG00028563001-RA_77790-79137	superscaffold_1_28353	1274	1280	40979	m8	x	m8
92	GSSPFG00034281001-RA	GSSPFG00034281001-RA_145760-146726	superscaffold_1_28353	376	382	41206	m8	x	m8
miR263a_5p
Row	target
1	GSSPFG00010982001	GSSPFG00010982001.2-RA_74334-81324	scaffold_2723_11025	1477	1483	170	8mer	x	8mer
2	GSSPFG00025213001	GSSPFG00025213001.3-RA_59309-62142	scaffold_2723_11025	2648	2654	313	1a	x	1a
3	GSSPFG00031627001	GSSPFG00031627001-RA_1898-2962	scaffold_2723_11025	388	394	362	1a	x	1a
4	GSSPFG00003705001	GSSPFG00003705001-RA_9373-10016	scaffold_2723_11025	432	438	402	m8	x	m8
5	GSSPFG00002606001	GSSPFG00002606001-RA_5092-6300	scaffold_2723_11025	284	290	427	m8	x	m8
6	GSSPFG00010112001	GSSPFG00010112001-RA_5030-6308	scaffold_2723_11025	365	371	676	m8	x	m8
7	GSSPFG00011190001	GSSPFG00011190001-RA_6901-7929	scaffold_2723_11025	758	764	831	m8	x	m8
8	GSSPFG00014959001	GSSPFG00014959001-RA_6610-9214	scaffold_2723_11025	479	485	892	1a	x	1a
9	GSSPFG00011685001	GSSPFG00011685001-RA_1719-2459	scaffold_2723_11025	487	493	930	m8	x	m8
10	GSSPFG00016871001	GSSPFG00016871001.3-RA_1942-3464	scaffold_2723_11025	467	473	996	1a	x	1a
11	GSSPFG00032687001	GSSPFG00032687001-RA_7508-7856	scaffold_2723_11025	230	236	1086	m8	x	m8
12	GSSPFG00026841001	GSSPFG00026841001-RA_243812-244867	scaffold_2723_11025	544	550	1119	1a	x	1a
13	GSSPFG00010884001	GSSPFG00010884001-RA_528-1132	scaffold_2723_11025	304	310	1198	1a	x	1a
14	GSSPFG00015558001	GSSPFG00015558001-RA_2989-4538	scaffold_2723_11025	761	767	1341	1a	x	1a
15	GSSPFG00015558001	GSSPFG00015558001-RA_2989-4538	scaffold_2723_11025	969	975	1342	1a	x	1a
16	GSSPFG00033118001	GSSPFG00033118001-RA_52189-53604	scaffold_2723_11025	503	509	1391	1a	x	1a
17	GSSPFG00024586001	GSSPFG00024586001-RA_15200-15778	scaffold_2723_11025	556	562	1451	8mer	x	8mer
18	GSSPFG00000471001	GSSPFG00000471001-RA_30846-30962	scaffold_2723_11025	111	117	1498	m8	x	m8
19	GSSPFG00020343001	GSSPFG00020343001-RA_1504-2278	scaffold_2723_11025	457	463	1546	1a	x	1a
20	GSSPFG00026896001	GSSPFG00026896001-RA_7174-7467	scaffold_2723_11025	9	15	1697	1a	x	1a
21	GSSPFG00010330001	GSSPFG00010330001-RA_43545-44190	scaffold_2723_11025	599	605	1715	m8	x	m8
22	GSSPFG00023819001	GSSPFG00023819001-RA_102420-102761	scaffold_2723_11025	98	104	1848	m8	x	m8
23	GSSPFG00007972001	GSSPFG00007972001-RA_5525-6020	scaffold_2723_11025	48	54	1888	1a	x	1a
24	GSSPFG00022248001	GSSPFG00022248001-RA_130967-132324	scaffold_2723_11025	1154	1160	2147	m8	x	m8
25	GSSPFG00013663001	GSSPFG00013663001-RA_3862-4089	scaffold_2723_11025	63	69	2197	8mer	x	8mer
26	GSSPFG00027188001	GSSPFG00027188001-RA_1693-2547	scaffold_2723_11025	71	77	2216	1a	x	1a
27	GSSPFG00009148001	GSSPFG00009148001-RA_6918-8544	scaffold_2723_11025	1457	1463	2366	1a	x	1a
28	GSSPFG00001120001	GSSPFG00001120001-RA_181256-181681	scaffold_2723_11025	312	318	2427	1a	x	1a
29	GSSPFG00011621001	GSSPFG00011621001-RA_3962-4738	scaffold_2723_11025	158	164	2443	1a	x	1a
30	GSSPFG00013790001	GSSPFG00013790001-RA_58099-59464	scaffold_2723_11025	103	109	2675	m8	x	m8
31	GSSPFG00017947001	GSSPFG00017947001-RA_7299-8741	scaffold_2723_11025	1355	1361	2771	m8	x	m8
32	GSSPFG00000706001	GSSPFG00000706001-RA_32441-32639	scaffold_2723_11025	75	81	2798	m8	x	m8
33	GSSPFG00025160001	GSSPFG00025160001-RA_7243-7923	scaffold_2723_11025	451	457	2816	m8	x	m8
34	GSSPFG00032646001	GSSPFG00032646001-RA_60163-60363	scaffold_2723_11025	163	169	2904	m8	x	m8
35	GSSPFG00026448001	GSSPFG00026448001-RA_5083-6082	scaffold_2723_11025	317	323	2921	1a	x	1a
36	GSSPFG00027343001	GSSPFG00027343001.3-RA_67664-69155	scaffold_2723_11025	1237	1243	2976	1a	x	1a
37	GSSPFG00014707001	GSSPFG00014707001-RA_46586-46896	scaffold_2723_11025	138	144	3027	1a	x	1a
38	GSSPFG00014708001	GSSPFG00014708001-RA_53958-54984	scaffold_2723_11025	138	144	3043	1a	x	1a
39	GSSPFG00010963001	GSSPFG00010963001-RA_3146-4563	scaffold_2723_11025	844	850	3172	m8	x	m8
40	GSSPFG00008404001	GSSPFG00008404001-RA_3496-4869	scaffold_2723_11025	929	935	3242	1a	x	1a
41	GSSPFG00030772001	GSSPFG00030772001-RA_150019-151475	scaffold_2723_11025	637	643	3307	m8	x	m8
42	GSSPFG00003818001	GSSPFG00003818001-RA_43305-43393	scaffold_2723_11025	37	43	3504	1a	x	1a
43	GSSPFG00029466001	GSSPFG00029466001-RA_637-1155	scaffold_2723_11025	485	491	3689	1a	x	1a
44	GSSPFG00022443001	GSSPFG00022443001.3-RA_4359-4916	scaffold_2723_11025	350	356	3693	1a	x	1a
45	GSSPFG00008521001	GSSPFG00008521001-RA_5358-6824	scaffold_2723_11025	296	302	3712	1a	x	1a
46	GSSPFG00013202001	GSSPFG00013202001-RA_1938-2949	scaffold_2723_11025	370	376	3778	1a	x	1a
47	GSSPFG00005474001	GSSPFG00005474001-RA_4384-4785	scaffold_2723_11025	95	101	3944	1a	x	1a
48	GSSPFG00034031001	GSSPFG00034031001-RA_6181-7051	scaffold_2723_11025	42	48	3983	8mer	x	8mer
49	GSSPFG00017629001	GSSPFG00017629001-RA_3545-4668	scaffold_2723_11025	835	841	4102	m8	x	m8
50	GSSPFG00002775001	GSSPFG00002775001-RA_3024-4074	scaffold_2723_11025	391	397	4215	m8	x	m8
51	GSSPFG00005645001	GSSPFG00005645001-RA_3154-4575	scaffold_2723_11025	870	876	4370	1a	x	1a
52	GSSPFG00020258001	GSSPFG00020258001-RA_4202-5025	scaffold_2723_11025	195	201	4498	1a	x	1a
53	GSSPFG00023768001	GSSPFG00023768001-RA_5150-5394	scaffold_2723_11025	60	66	4525	m8	x	m8
54	GSSPFG00003153001	GSSPFG00003153001-RA_5658-6917	scaffold_2723_11025	1075	1081	4556	1a	x	1a
55	GSSPFG00027553001	GSSPFG00027553001-RA_5661-7130	scaffold_2723_11025	843	849	4669	1a	x	1a
56	GSSPFG00013406001	GSSPFG00013406001-RA_58577-59589	scaffold_2723_11025	452	458	5090	m8	x	m8
57	GSSPFG00012190001	GSSPFG00012190001-RA_16037-17479	scaffold_2723_11025	987	993	5141	1a	x	1a
58	GSSPFG00015413001	GSSPFG00015413001-RA_50382-51476	scaffold_2723_11025	236	242	5181	1a	x	1a
59	GSSPFG00020816001	GSSPFG00020816001-RA_46941-47218	scaffold_2723_11025	159	165	5313	m8	x	m8
60	GSSPFG00012677001	GSSPFG00012677001-RA_2445-3467	scaffold_2723_11025	188	194	5351	8mer	x	8mer
61	GSSPFG00021557001	GSSPFG00021557001-RA_8360-9641	scaffold_2723_11025	149	155	5366	m8	x	m8
62	GSSPFG00011689001	GSSPFG00011689001-RA_31913-33304	scaffold_2723_11025	1310	1316	5488	1a	x	1a
63	GSSPFG00007361001	GSSPFG00007361001-RA_26119-26758	scaffold_2723_11025	611	617	5860	m8	x	m8
64	GSSPFG00032361001	GSSPFG00032361001-RA_2690-2722	scaffold_2723_11025	8	14	5960	m8	x	m8
65	GSSPFG00012369001	GSSPFG00012369001-RA_1287-2513	scaffold_2723_11025	383	389	5963	m8	x	m8
66	GSSPFG00012369001	GSSPFG00012369001-RA_1287-2513	scaffold_2723_11025	920	926	5964	1a	x	1a
67	GSSPFG00008822001	GSSPFG00008822001-RA_40423-40996	scaffold_2723_11025	434	440	6051	1a	x	1a
68	GSSPFG00017791001	GSSPFG00017791001-RA_4172-5355	scaffold_2723_11025	631	637	6153	1a	x	1a
69	GSSPFG00015296001	GSSPFG00015296001-RA_41036-42458	scaffold_2723_11025	1153	1159	6284	1a	x	1a
70	GSSPFG00019913001	GSSPFG00019913001-RA_729-771	scaffold_2723_11025	33	39	6553	8mer	x	8mer
71	GSSPFG00007489001	GSSPFG00007489001-RA_2216-2847	scaffold_2723_11025	14	20	6583	1a	x	1a
72	GSSPFG00026857001	GSSPFG00026857001.5-RA_4872-6214	scaffold_2723_11025	1243	1249	6706	1a	x	1a
73	GSSPFG00006148001	GSSPFG00006148001-RA_263133-263934	scaffold_2723_11025	357	363	6740	1a	x	1a
74	GSSPFG00022387001	GSSPFG00022387001-RA_5142-5373	scaffold_2723_11025	70	76	6843	1a	x	1a
75	GSSPFG00026810001	GSSPFG00026810001-RA_45693-46359	scaffold_2723_11025	497	503	6903	8mer	x	8mer
76	GSSPFG00006300001	GSSPFG00006300001-RA_3621-4961	scaffold_2723_11025	387	393	6970	m8	x	m8
77	GSSPFG00016958001	GSSPFG00016958001-RA_1138-1619	scaffold_2723_11025	445	451	7169	8mer	x	8mer
78	GSSPFG00013845001	GSSPFG00013845001-RA_39777-40246	scaffold_2723_11025	37	43	7281	1a	x	1a
79	GSSPFG00023478001	GSSPFG00023478001-RA_47396-48650	scaffold_2723_11025	303	309	7410	1a	x	1a
80	GSSPFG00001086001	GSSPFG00001086001.3-RA_948-2427	scaffold_2723_11025	1167	1173	7512	1a	x	1a
81	GSSPFG00023893001	GSSPFG00023893001-RA_2561-3349	scaffold_2723_11025	233	239	7550	m8	x	m8
82	GSSPFG00015438001	GSSPFG00015438001-RA_4207-5019	scaffold_2723_11025	348	354	7562	m8	x	m8
83	GSSPFG00024056001	GSSPFG00024056001-RA_3079-4243	scaffold_2723_11025	397	403	7652	1a	x	1a
84	GSSPFG00002981001	GSSPFG00002981001-RA_3739-5069	scaffold_2723_11025	778	784	7976	m8	x	m8
85	GSSPFG00029346001	GSSPFG00029346001-RA_148132-148788	scaffold_2723_11025	494	500	8004	m8	x	m8
86	GSSPFG00000999001	GSSPFG00000999001.3-RA_48794-50373	scaffold_2723_11025	153	159	8132	1a	x	1a
87	GSSPFG00033522001	GSSPFG00033522001-RA_2973-4234	scaffold_2723_11025	688	694	8181	1a	x	1a
88	GSSPFG00016295001	GSSPFG00016295001-RA_166818-168527	scaffold_2723_11025	610	616	8221	m8	x	m8
89	GSSPFG00035168001	GSSPFG00035168001.3-RA_2078-2266	scaffold_2723_11025	74	80	8233	1a	x	1a
90	GSSPFG00021745001	GSSPFG00021745001-RA_3118-4169	scaffold_2723_11025	444	450	8287	m8	x	m8
91	GSSPFG00007694001	GSSPFG00007694001-RA_25030-26324	scaffold_2723_11025	1267	1273	8494	m8	x	m8
92	GSSPFG00028497001	GSSPFG00028497001-RA_179677-180753	scaffold_2723_11025	485	491	8508	8mer	x	8mer
93	GSSPFG00005153001	GSSPFG00005153001.3-RA_638-3104	scaffold_2723_11025	978	984	8662	m8	x	m8
94	GSSPFG00028680001	GSSPFG00028680001-RA_1350-1897	scaffold_2723_11025	185	191	8767	8mer	x	8mer
95	GSSPFG00022240001	GSSPFG00022240001-RA_2438-3068	scaffold_2723_11025	251	257	8781	1a	x	1a
96	GSSPFG00008062001	GSSPFG00008062001-RA_233-1530	scaffold_2723_11025	598	604	9067	m8	x	m8
97	GSSPFG00002209001	GSSPFG00002209001-RA_930-1726	scaffold_2723_11025	414	420	9111	m8	x	m8
98	GSSPFG00005647001	GSSPFG00005647001-RA_3510-3804	scaffold_2723_11025	168	174	9162	m8	x	m8
99	GSSPFG00010440001	GSSPFG00010440001-RA_1403-2828	scaffold_2723_11025	769	775	9228	1a	x	1a
100	GSSPFG00005566001	GSSPFG00005566001-RA_17312-18331	scaffold_2723_11025	246	252	9237	m8	x	m8
101	GSSPFG00006755001	GSSPFG00006755001-RA_949-2337	scaffold_2723_11025	1322	1328	9671	1a	x	1a
102	GSSPFG00020153001	GSSPFG00020153001-RA_12390-12861	scaffold_2723_11025	136	142	9822	m8	x	m8
103	GSSPFG00021523001	GSSPFG00021523001-RA_52525-53013	scaffold_2723_11025	169	175	9881	m8	x	m8
104	GSSPFG00003786001	GSSPFG00003786001-RA_12015-13146	scaffold_2723_11025	370	376	10228	1a	x	1a
105	GSSPFG00028940001	GSSPFG00028940001-RA_46444-47837	scaffold_2723_11025	586	592	10255	8mer	x	8mer
106	GSSPFG00014267001	GSSPFG00014267001-RA_40219-41993	scaffold_2723_11025	432	438	10393	1a	x	1a
107	GSSPFG00000595001	GSSPFG00000595001-RA_2651-3898	scaffold_2723_11025	1168	1174	10515	m8	x	m8
108	GSSPFG00016344001	GSSPFG00016344001-RA_48249-49012	scaffold_2723_11025	643	649	10656	m8	x	m8
109	GSSPFG00027849001	GSSPFG00027849001-RA_1721-1839	scaffold_2723_11025	64	70	10759	m8	x	m8
110	GSSPFG00021658001	GSSPFG00021658001-RA_8683-10137	scaffold_2723_11025	1192	1198	11138	1a	x	1a
111	GSSPFG00018036001	GSSPFG00018036001-RA_195312-196638	scaffold_2723_11025	221	227	11350	m8	x	m8
112	GSSPFG00011554001	GSSPFG00011554001-RA_41213-41872	scaffold_2723_11025	68	74	11401	8mer	x	8mer
113	GSSPFG00025992001	GSSPFG00025992001-RA_3199-3477	scaffold_2723_11025	214	220	11407	8mer	x	8mer
114	GSSPFG00014305001	GSSPFG00014305001-RA_1684-1799	scaffold_2723_11025	73	79	11420	1a	x	1a
115	GSSPFG00013145001	GSSPFG00013145001-RA_3358-3856	scaffold_2723_11025	274	280	11423	1a	x	1a
116	GSSPFG00002285001	GSSPFG00002285001-RA_3311-3817	scaffold_2723_11025	118	124	11445	m8	x	m8
117	GSSPFG00008166001	GSSPFG00008166001-RA_1634-2588	scaffold_2723_11025	640	646	11454	8mer	x	8mer
118	GSSPFG00034390001	GSSPFG00034390001-RA_33591-34596	scaffold_2723_11025	917	923	11486	1a	x	1a
119	GSSPFG00001507001	GSSPFG00001507001-RA_20545-20824	scaffold_2723_11025	173	179	11734	1a	x	1a
120	GSSPFG00029432001	GSSPFG00029432001-RA_35925-37480	scaffold_2723_11025	44	50	11754	m8	x	m8
121	GSSPFG00020934001	GSSPFG00020934001-RA_75982-76908	scaffold_2723_11025	580	586	12134	8mer	x	8mer
122	GSSPFG00020934001	GSSPFG00020934001-RA_75982-76908	scaffold_2723_11025	665	671	12135	m8	x	m8
123	GSSPFG00020940001	GSSPFG00020940001.3-RA_143278-144311	scaffold_2723_11025	492	498	12142	m8	x	m8
124	GSSPFG00021013001	GSSPFG00021013001.3-RA_37464-38702	scaffold_2723_11025	389	395	12171	m8	x	m8
125	GSSPFG00028641001	GSSPFG00028641001-RA_169552-170642	scaffold_2723_11025	753	759	12283	1a	x	1a
126	GSSPFG00017370001	GSSPFG00017370001-RA_30966-31589	scaffold_2723_11025	612	618	12329	1a	x	1a
127	GSSPFG00033571001	GSSPFG00033571001-RA_2243-3543	scaffold_2723_11025	556	562	12405	1a	x	1a
128	GSSPFG00022684001	GSSPFG00022684001-RA_20539-21058	scaffold_2723_11025	463	469	12468	m8	x	m8
129	GSSPFG00034421001	GSSPFG00034421001-RA_20813-22033	scaffold_2723_11025	188	194	12578	1a	x	1a
130	GSSPFG00002965001	GSSPFG00002965001-RA_41129-42304	scaffold_2723_11025	654	660	12684	m8	x	m8
131	GSSPFG00000626001	GSSPFG00000626001-RA_158292-158849	scaffold_2723_11025	432	438	12855	1a	x	1a
132	GSSPFG00001266001	GSSPFG00001266001-RA_2461-3195	scaffold_2723_11025	76	82	12951	m8	x	m8
133	GSSPFG00028269001	GSSPFG00028269001-RA_32463-33162	scaffold_2723_11025	328	334	13068	m8	x	m8
134	GSSPFG00032655001	GSSPFG00032655001-RA_2124-2739	scaffold_2723_11025	446	452	13107	m8	x	m8
135	GSSPFG00028539001	GSSPFG00028539001-RA_100214-100965	scaffold_2723_11025	719	725	13374	1a	x	1a
136	GSSPFG00005943001	GSSPFG00005943001-RA_2662-3240	scaffold_2723_11025	28	34	13406	1a	x	1a
137	GSSPFG00028219001	GSSPFG00028219001-RA_10723-11512	scaffold_2723_11025	176	182	13665	m8	x	m8
138	GSSPFG00017800001	GSSPFG00017800001-RA_141508-141787	scaffold_2723_11025	266	272	13680	1a	x	1a
139	GSSPFG00022000001	GSSPFG00022000001.3-RA_41819-42702	scaffold_2723_11025	492	498	13844	m8	x	m8
140	GSSPFG00010817001	GSSPFG00010817001-RA_23552-24829	scaffold_2723_11025	635	641	13994	1a	x	1a
141	GSSPFG00001484001	GSSPFG00001484001-RA_2020-3090	scaffold_2723_11025	822	828	14156	m8	x	m8
142	GSSPFG00019063001	GSSPFG00019063001-RA_980-2109	scaffold_2723_11025	1120	1126	14238	m8	x	m8
143	GSSPFG00031572001	GSSPFG00031572001-RA_142379-143764	scaffold_2723_11025	1342	1348	14364	1a	x	1a
144	GSSPFG00034323001	GSSPFG00034323001-RA_973-2354	scaffold_2723_11025	887	893	14409	1a	x	1a
145	GSSPFG00019532001	GSSPFG00019532001-RA_1249-2687	scaffold_2723_11025	874	880	14446	m8	x	m8
146	GSSPFG00035250001	GSSPFG00035250001.3-RA_917-1121	scaffold_2723_11025	67	73	14486	m8	x	m8
147	GSSPFG00001565001	GSSPFG00001565001-RA_61682-62609	scaffold_2723_11025	227	233	14548	1a	x	1a
148	GSSPFG00002850001	GSSPFG00002850001.3-RA_18475-23075	scaffold_2723_11025	3789	3795	14652	m8	x	m8
149	GSSPFG00025066001	GSSPFG00025066001.3-RA_214-932	scaffold_2723_11025	704	710	14685	1a	x	1a
150	GSSPFG00033269001	GSSPFG00033269001-RA_1408-2368	scaffold_2723_11025	324	330	14711	1a	x	1a
151	GSSPFG00007700001	GSSPFG00007700001-RA_3241-4338	scaffold_2723_11025	693	699	14728	8mer	x	8mer
152	GSSPFG00030838001	GSSPFG00030838001-RA_22213-23421	scaffold_2723_11025	383	389	14825	1a	x	1a
153	GSSPFG00030839001	GSSPFG00030839001-RA_29873-30983	scaffold_2723_11025	596	602	14837	1a	x	1a
154	GSSPFG00011380001	GSSPFG00011380001-RA_18664-19289	scaffold_2723_11025	546	552	14954	m8	x	m8
155	GSSPFG00021740001	GSSPFG00021740001-RA_488-983	scaffold_2723_11025	63	69	14969	1a	x	1a
156	GSSPFG00004423001	GSSPFG00004423001-RA_11182-11841	scaffold_2723_11025	68	74	15141	8mer	x	8mer
157	GSSPFG00028110001	GSSPFG00028110001-RA_26271-26876	scaffold_2723_11025	19	25	15221	1a	x	1a
158	GSSPFG00029808001	GSSPFG00029808001-RA_1331-2337	scaffold_2723_11025	939	945	15276	m8	x	m8
159	GSSPFG00026502001	GSSPFG00026502001-RA_28553-29667	scaffold_2723_11025	347	353	15390	m8	x	m8
160	GSSPFG00012238001	GSSPFG00012238001-RA_13547-14496	scaffold_2723_11025	327	333	15438	8mer	x	8mer
161	GSSPFG00019413001	GSSPFG00019413001-RA_28942-29828	scaffold_2723_11025	170	176	15512	1a	x	1a
162	GSSPFG00019415001	GSSPFG00019415001-RA_36359-37780	scaffold_2723_11025	870	876	15526	1a	x	1a
163	GSSPFG00021498001	GSSPFG00021498001-RA_333-1096	scaffold_2723_11025	471	477	15547	1a	x	1a
164	GSSPFG00021500001	GSSPFG00021500001.3-RA_32394-33260	scaffold_2723_11025	541	547	15557	m8	x	m8
165	GSSPFG00001631001	GSSPFG00001631001-RA_66860-67973	scaffold_2723_11025	367	373	15567	1a	x	1a
166	GSSPFG00016417001	GSSPFG00016417001-RA_357307-358677	scaffold_2723_11025	891	897	15736	1a	x	1a
167	GSSPFG00016418001	GSSPFG00016418001-RA_358861-358911	scaffold_2723_11025	26	32	15743	1a	x	1a
168	GSSPFG00005549001	GSSPFG00005549001-RA_27704-28645	scaffold_2723_11025	602	608	15759	8mer	x	8mer
169	GSSPFG00028429001	GSSPFG00028429001-RA_18079-18670	scaffold_2723_11025	204	210	15827	8mer	x	8mer
170	GSSPFG00005230001	GSSPFG00005230001-RA_16532-17828	scaffold_2723_11025	106	112	15873	m8	x	m8
171	GSSPFG00005230001	GSSPFG00005230001-RA_16532-17828	scaffold_2723_11025	145	151	15874	m8	x	m8
172	GSSPFG00033657001	GSSPFG00033657001-RA_697-1707	scaffold_2723_11025	170	176	16025	8mer	x	8mer
173	GSSPFG00006082001	GSSPFG00006082001-RA_203-1190	scaffold_2723_11025	54	60	16094	m8	x	m8
174	GSSPFG00010952001	GSSPFG00010952001-RA_19315-19469	scaffold_2723_11025	79	85	16146	1a	x	1a
175	GSSPFG00014964001	GSSPFG00014964001-RA_28605-29730	scaffold_2723_11025	251	257	16336	1a	x	1a
176	GSSPFG00011377001	GSSPFG00011377001-RA_333-1499	scaffold_2723_11025	732	738	16366	m8	x	m8
177	GSSPFG00012306001	GSSPFG00012306001-RA_7545-8155	scaffold_2723_11025	423	429	16389	8mer	x	8mer
178	GSSPFG00010782001	GSSPFG00010782001-RA_4552-6081	scaffold_2723_11025	496	502	16623	m8	x	m8
179	GSSPFG00031035001	GSSPFG00031035001-RA_1526-1721	scaffold_2723_11025	177	183	16672	1a	x	1a
180	GSSPFG00024238001	GSSPFG00024238001-RA_265-1229	scaffold_2723_11025	48	54	16763	1a	x	1a
181	GSSPFG00032050001	GSSPFG00032050001-RA_103729-105085	scaffold_2723_11025	1163	1169	16928	1a	x	1a
182	GSSPFG00025255001	GSSPFG00025255001-RA_213-1293	scaffold_2723_11025	429	435	17361	1a	x	1a
183	GSSPFG00025255001	GSSPFG00025255001-RA_213-1293	scaffold_2723_11025	952	958	17362	1a	x	1a
184	GSSPFG00011237001	GSSPFG00011237001-RA_27315-28760	scaffold_2723_11025	377	383	17399	1a	x	1a
185	GSSPFG00029733001	GSSPFG00029733001-RA_25226-26271	scaffold_2723_11025	51	57	17433	1a	x	1a
186	GSSPFG00017804001	GSSPFG00017804001.2-RA_14827-18049	scaffold_2723_11025	675	681	17468	1a	x	1a
187	GSSPFG00020152001	GSSPFG00020152001-RA_190-1463	scaffold_2723_11025	993	999	17558	1a	x	1a
188	GSSPFG00012867001	GSSPFG00012867001.3-RA_414-1434	scaffold_2723_11025	758	764	17631	m8	x	m8
189	GSSPFG00030223001	GSSPFG00030223001-RA_159202-159256	scaffold_2723_11025	26	32	17684	1a	x	1a
190	GSSPFG00022053001	GSSPFG00022053001-RA_11194-12319	scaffold_2723_11025	318	324	17718	m8	x	m8
191	GSSPFG00020192001	GSSPFG00020192001-RA_121431-121847	scaffold_2723_11025	190	196	17759	1a	x	1a
192	GSSPFG00020192001	GSSPFG00020192001-RA_121431-121847	scaffold_2723_11025	277	283	17760	8mer	x	8mer
193	GSSPFG00033152001	GSSPFG00033152001-RA_5588-6498	scaffold_2723_11025	111	117	17866	8mer	x	8mer
194	GSSPFG00001904001	GSSPFG00001904001-RA_24349-25842	scaffold_2723_11025	894	900	17913	m8	x	m8
195	GSSPFG00000123001	GSSPFG00000123001.3-RA_24383-25310	scaffold_2723_11025	372	378	18068	8mer	x	8mer
196	GSSPFG00010854001	GSSPFG00010854001-RA_5343-6635	scaffold_2723_11025	1108	1114	18199	8mer	x	8mer
197	GSSPFG00029009001	GSSPFG00029009001-RA_16329-17555	scaffold_2723_11025	486	492	18218	m8	x	m8
198	GSSPFG00033707001	GSSPFG00033707001-RA_5076-6212	scaffold_2723_11025	295	301	18270	1a	x	1a
199	GSSPFG00007437001	GSSPFG00007437001.3-RA_1982-3566	scaffold_2723_11025	560	566	18439	m8	x	m8
200	GSSPFG00007437001	GSSPFG00007437001.3-RA_1982-3566	scaffold_2723_11025	833	839	18440	1a	x	1a
201	GSSPFG00006403001	GSSPFG00006403001-RA_5756-6317	scaffold_2723_11025	163	169	18518	1a	x	1a
202	GSSPFG00015785001	GSSPFG00015785001-RA_191-1451	scaffold_2723_11025	903	909	18683	m8	x	m8
203	GSSPFG00025661001	GSSPFG00025661001.3-RA_19234-20295	scaffold_2723_11025	1029	1035	18753	1a	x	1a
204	GSSPFG00031241001	GSSPFG00031241001-RA_20262-20617	scaffold_2723_11025	141	147	18815	m8	x	m8
205	GSSPFG00028412001	GSSPFG00028412001-RA_10262-11548	scaffold_2723_11025	182	188	18864	1a	x	1a
206	GSSPFG00025635001	GSSPFG00025635001-RA_8576-8940	scaffold_2723_11025	188	194	19044	1a	x	1a
207	GSSPFG00025432001	GSSPFG00025432001-RA_269612-270710	scaffold_2723_11025	874	880	19127	8mer	x	8mer
208	GSSPFG00021842001	GSSPFG00021842001-RA_50789-51626	scaffold_2723_11025	369	375	19145	1a	x	1a
209	GSSPFG00021844001	GSSPFG00021844001-RA_105906-107420	scaffold_2723_11025	967	973	19170	1a	x	1a
210	GSSPFG00023124001	GSSPFG00023124001-RA_14147-15367	scaffold_2723_11025	436	442	19424	8mer	x	8mer
211	GSSPFG00023124001	GSSPFG00023124001-RA_14147-15367	scaffold_2723_11025	961	967	19425	m8	x	m8
212	GSSPFG00004339001	GSSPFG00004339001-RA_130474-130987	scaffold_2723_11025	450	456	19753	m8	x	m8
213	GSSPFG00019850001	GSSPFG00019850001-RA_1365-1639	scaffold_2723_11025	155	161	19760	1a	x	1a
214	GSSPFG00020580001	GSSPFG00020580001-RA_14677-14975	scaffold_2723_11025	67	73	19809	1a	x	1a
215	GSSPFG00018183001	GSSPFG00018183001-RA_148639-149957	scaffold_2723_11025	1107	1113	19864	1a	x	1a
216	GSSPFG00002762001	GSSPFG00002762001-RA_108644-109384	scaffold_2723_11025	545	551	19924	8mer	x	8mer
217	GSSPFG00013817001	GSSPFG00013817001-RA_8898-10141	scaffold_2723_11025	284	290	20126	1a	x	1a
218	GSSPFG00023681001	GSSPFG00023681001-RA_8471-10024	scaffold_2723_11025	1197	1203	20277	m8	x	m8
219	GSSPFG00005193001	GSSPFG00005193001-RA_5017-6196	scaffold_2723_11025	649	655	20336	8mer	x	8mer
220	GSSPFG00005194001	GSSPFG00005194001-RA_8743-9542	scaffold_2723_11025	482	488	20360	1a	x	1a
221	GSSPFG00005906001	GSSPFG00005906001.3-RA_2096-5565	scaffold_2723_11025	2724	2730	20461	m8	x	m8
222	GSSPFG00000976001	GSSPFG00000976001-RA_6074-7354	scaffold_2723_11025	1	7	20555	1a	x	1a
223	GSSPFG00027301001	GSSPFG00027301001-RA_11742-12066	scaffold_2723_11025	196	202	20747	1a	x	1a
224	GSSPFG00003579001	GSSPFG00003579001-RA_29998-30452	scaffold_2723_11025	68	74	20931	8mer	x	8mer
225	GSSPFG00018836001	GSSPFG00018836001-RA_20798-21555	scaffold_2723_11025	284	290	20938	1a	x	1a
226	GSSPFG00023493001	GSSPFG00023493001-RA_4303-5709	scaffold_2723_11025	762	768	20959	1a	x	1a
227	GSSPFG00024379001	GSSPFG00024379001-RA_8534-8974	scaffold_2723_11025	393	399	21005	m8	x	m8
228	GSSPFG00020924001	GSSPFG00020924001.3-RA_2811-5231	scaffold_2723_11025	579	585	21030	1a	x	1a
229	GSSPFG00035978001	GSSPFG00035978001.2-RA_133986-138635	scaffold_2723_11025	1733	1739	21238	1a	x	1a
230	GSSPFG00010837001	GSSPFG00010837001-RA_58494-59138	scaffold_2723_11025	178	184	21312	1a	x	1a
231	GSSPFG00010834001	GSSPFG00010834001-RA_46835-47821	scaffold_2723_11025	114	120	21322	1a	x	1a
232	GSSPFG00020802001	GSSPFG00020802001-RA_90921-91897	scaffold_2723_11025	856	862	21372	1a	x	1a
233	GSSPFG00006655001	GSSPFG00006655001-RA_14510-15883	scaffold_2723_11025	745	751	21407	8mer	x	8mer
234	GSSPFG00006839001	GSSPFG00006839001-RA_27347-28322	scaffold_2723_11025	279	285	21720	1a	x	1a
235	GSSPFG00015183001	GSSPFG00015183001-RA_131724-132983	scaffold_2723_11025	153	159	21836	8mer	x	8mer
236	GSSPFG00000376001	GSSPFG00000376001-RA_38458-39066	scaffold_2723_11025	414	420	22372	m8	x	m8
237	GSSPFG00011185001	GSSPFG00011185001-RA_12511-14022	scaffold_2723_11025	66	72	22464	8mer	x	8mer
238	GSSPFG00026936001	GSSPFG00026936001-RA_64584-65138	scaffold_2723_11025	498	504	22750	m8	x	m8
239	GSSPFG00008317001	GSSPFG00008317001-RA_11476-12536	scaffold_2723_11025	648	654	22828	1a	x	1a
240	GSSPFG00024508001	GSSPFG00024508001.3-RA_4454-5246	scaffold_2723_11025	124	130	22849	m8	x	m8
241	GSSPFG00027866001	GSSPFG00027866001-RA_255-1151	scaffold_2723_11025	197	203	22870	1a	x	1a
242	GSSPFG00022114001	GSSPFG00022114001-RA_1549-2374	scaffold_2723_11025	396	402	22968	m8	x	m8
243	GSSPFG00019607001	GSSPFG00019607001-RA_26743-27366	scaffold_2723_11025	327	333	23008	8mer	x	8mer
244	GSSPFG00031211001	GSSPFG00031211001-RA_8027-9056	scaffold_2723_11025	919	925	23074	1a	x	1a
245	GSSPFG00027778001	GSSPFG00027778001-RA_17229-18110	scaffold_2723_11025	480	486	23144	m8	x	m8
246	GSSPFG00027778001	GSSPFG00027778001-RA_17229-18110	scaffold_2723_11025	685	691	23145	m8	x	m8
247	GSSPFG00011865001	GSSPFG00011865001-RA_53638-54817	scaffold_2723_11025	389	395	23187	1a	x	1a
248	GSSPFG00016698001	GSSPFG00016698001-RA_5617-5888	scaffold_2723_11025	60	66	23355	1a	x	1a
249	GSSPFG00013736001	GSSPFG00013736001-RA_2868-3527	scaffold_2723_11025	68	74	23388	8mer	x	8mer
250	GSSPFG00023197001	GSSPFG00023197001-RA_11448-12534	scaffold_2723_11025	864	870	23413	1a	x	1a
251	GSSPFG00030758001	GSSPFG00030758001-RA_229170-230406	scaffold_2723_11025	65	71	23430	8mer	x	8mer
252	GSSPFG00032253001	GSSPFG00032253001-RA_6519-7474	scaffold_2723_11025	827	833	23622	m8	x	m8
253	GSSPFG00030827001	GSSPFG00030827001-RA_110788-112063	scaffold_2723_11025	619	625	23746	1a	x	1a
254	GSSPFG00003397001	GSSPFG00003397001.3-RA_11127-12030	scaffold_2723_11025	198	204	23874	1a	x	1a
255	GSSPFG00002295001	GSSPFG00002295001-RA_10035-10702	scaffold_2723_11025	242	248	23884	1a	x	1a
256	GSSPFG00022262001	GSSPFG00022262001-RA_13370-14339	scaffold_2723_11025	247	253	23939	1a	x	1a
257	GSSPFG00018499001	GSSPFG00018499001-RA_2351-3186	scaffold_2723_11025	652	658	24076	m8	x	m8
258	GSSPFG00028825001	GSSPFG00028825001.4-RA_88742-89965	scaffold_2723_11025	381	387	24263	m8	x	m8
259	GSSPFG00031342001	GSSPFG00031342001.3-RA_15456-16359	scaffold_2723_11025	524	530	24411	m8	x	m8
260	GSSPFG00010502001	GSSPFG00010502001-RA_96758-96836	scaffold_2723_11025	37	43	24434	1a	x	1a
261	GSSPFG00007064001	GSSPFG00007064001-RA_1990-3484	scaffold_2723_11025	692	698	24513	8mer	x	8mer
262	GSSPFG00017973001	GSSPFG00017973001-RA_12377-13478	scaffold_2723_11025	579	585	24565	1a	x	1a
263	GSSPFG00030680001	GSSPFG00030680001-RA_8324-8599	scaffold_2723_11025	83	89	24756	8mer	x	8mer
264	GSSPFG00020717001	GSSPFG00020717001-RA_8111-9343	scaffold_2723_11025	648	654	24766	1a	x	1a
265	GSSPFG00026457001	GSSPFG00026457001-RA_107199-107652	scaffold_2723_11025	320	326	24878	1a	x	1a
266	GSSPFG00028362001	GSSPFG00028362001-RA_15507-16148	scaffold_2723_11025	580	586	25059	8mer	x	8mer
267	GSSPFG00003251001	GSSPFG00003251001.2-RA_4620-5067	scaffold_2723_11025	42	48	25088	1a	x	1a
268	GSSPFG00004939001	GSSPFG00004939001-RA_7538-8276	scaffold_2723_11025	486	492	25166	m8	x	m8
269	GSSPFG00029195001	GSSPFG00029195001-RA_994-2510	scaffold_2723_11025	1067	1073	25259	1a	x	1a
270	GSSPFG00021007001	GSSPFG00021007001-RA_12486-12714	scaffold_2723_11025	140	146	25346	1a	x	1a
271	GSSPFG00006134001	GSSPFG00006134001-RA_13192-14280	scaffold_2723_11025	705	711	25351	8mer	x	8mer
272	GSSPFG00016786001	GSSPFG00016786001.2-RA_13677-15101	scaffold_2723_11025	245	251	25395	1a	x	1a
273	GSSPFG00006477001	GSSPFG00006477001-RA_637-1488	scaffold_2723_11025	442	448	25456	1a	x	1a
274	GSSPFG00032800001	GSSPFG00032800001-RA_5487-6558	scaffold_2723_11025	598	604	25533	1a	x	1a
275	GSSPFG00032801001	GSSPFG00032801001-RA_12265-13244	scaffold_2723_11025	513	519	25541	1a	x	1a
276	GSSPFG00005884001	GSSPFG00005884001.3-RA_14062-15304	scaffold_2723_11025	799	805	25568	1a	x	1a
277	GSSPFG00024425001	GSSPFG00024425001.3-RA_79306-80176	scaffold_2723_11025	541	547	25886	m8	x	m8
278	GSSPFG00019383001	GSSPFG00019383001-RA_68780-70057	scaffold_2723_11025	187	193	26011	1a	x	1a
279	GSSPFG00010874001	GSSPFG00010874001-RA_8425-9725	scaffold_2723_11025	83	89	26087	m8	x	m8
280	GSSPFG00015679001	GSSPFG00015679001-RA_58427-59512	scaffold_2723_11025	639	645	26232	1a	x	1a
281	GSSPFG00011073001	GSSPFG00011073001-RA_1270-2232	scaffold_2723_11025	740	746	26311	1a	x	1a
282	GSSPFG00033313001	GSSPFG00033313001-RA_6657-7390	scaffold_2723_11025	509	515	26365	8mer	x	8mer
283	GSSPFG00023208001	GSSPFG00023208001-RA_2139-3464	scaffold_2723_11025	568	574	26498	1a	x	1a
284	GSSPFG00013869001	GSSPFG00013869001-RA_41069-41966	scaffold_2723_11025	121	127	26549	1a	x	1a
285	GSSPFG00013870001	GSSPFG00013870001-RA_43495-44721	scaffold_2723_11025	208	214	26569	1a	x	1a
286	GSSPFG00013870001	GSSPFG00013870001-RA_43495-44721	scaffold_2723_11025	928	934	26570	1a	x	1a
287	GSSPFG00005676001	GSSPFG00005676001-RA_16811-17769	scaffold_2723_11025	638	644	26678	1a	x	1a
288	GSSPFG00017033001	GSSPFG00017033001-RA_12642-13092	scaffold_2723_11025	119	125	26687	1a	x	1a
289	GSSPFG00008472001	GSSPFG00008472001-RA_7041-7951	scaffold_2723_11025	555	561	26761	1a	x	1a
290	GSSPFG00003013001	GSSPFG00003013001-RA_9131-9863	scaffold_2723_11025	519	525	26882	1a	x	1a
291	GSSPFG00004313001	GSSPFG00004313001-RA_76526-76718	scaffold_2723_11025	148	154	26920	1a	x	1a
292	GSSPFG00012573001	GSSPFG00012573001-RA_7195-8495	scaffold_2723_11025	83	89	27044	m8	x	m8
293	GSSPFG00015463001	GSSPFG00015463001-RA_6982-7544	scaffold_2723_11025	33	39	27343	1a	x	1a
294	GSSPFG00016134001	GSSPFG00016134001.3-RA_7444-8415	scaffold_2723_11025	965	971	27460	1a	x	1a
295	GSSPFG00031155001	GSSPFG00031155001-RA_48324-48687	scaffold_2723_11025	228	234	27474	m8	x	m8
296	GSSPFG00000062001	GSSPFG00000062001-RA_57137-58434	scaffold_2723_11025	146	152	27505	1a	x	1a
297	GSSPFG00004318001	GSSPFG00004318001-RA_6617-6866	scaffold_2723_11025	117	123	27735	1a	x	1a
298	GSSPFG00005268001	GSSPFG00005268001.2-RA_34834-36150	scaffold_2723_11025	102	108	27825	m8	x	m8
299	GSSPFG00023791001	GSSPFG00023791001.3-RA_6172-6812	scaffold_2723_11025	120	126	27958	m8	x	m8
300	GSSPFG00030288001	GSSPFG00030288001-RA_5652-6726	scaffold_2723_11025	926	932	28062	8mer	x	8mer
301	GSSPFG00012420001	GSSPFG00012420001-RA_8682-10189	scaffold_2723_11025	401	407	28124	1a	x	1a
302	GSSPFG00012420001	GSSPFG00012420001-RA_8682-10189	scaffold_2723_11025	871	877	28125	1a	x	1a
303	GSSPFG00034878001	GSSPFG00034878001-RA_56854-57892	scaffold_2723_11025	371	377	28363	1a	x	1a
304	GSSPFG00018772001	GSSPFG00018772001-RA_9482-9782	scaffold_2723_11025	14	20	28428	1a	x	1a
305	GSSPFG00000698001	GSSPFG00000698001-RA_5358-6212	scaffold_2723_11025	547	553	28569	8mer	x	8mer
306	GSSPFG00000698001	GSSPFG00000698001-RA_5358-6212	scaffold_2723_11025	657	663	28570	m8	x	m8
307	GSSPFG00031635001	GSSPFG00031635001-RA_429-912	scaffold_2723_11025	19	25	28584	m8	x	m8
308	GSSPFG00009539001	GSSPFG00009539001-RA_253879-255496	scaffold_2723_11025	1393	1399	28611	m8	x	m8
309	GSSPFG00020627001	GSSPFG00020627001-RA_74924-75646	scaffold_2723_11025	3	9	28630	1a	x	1a
310	GSSPFG00034067001	GSSPFG00034067001-RA_55389-56701	scaffold_2723_11025	194	200	28873	8mer	x	8mer
311	GSSPFG00034067001	GSSPFG00034067001-RA_55389-56701	scaffold_2723_11025	366	372	28874	1a	x	1a
312	GSSPFG00024444001	GSSPFG00024444001-RA_65348-65922	scaffold_2723_11025	357	363	28951	1a	x	1a
313	GSSPFG00020847001	GSSPFG00020847001.3-RA_8153-10467	scaffold_2723_11025	1335	1341	29013	1a	x	1a
314	GSSPFG00028435001	GSSPFG00028435001-RA_3734-4741	scaffold_2723_11025	609	615	29112	1a	x	1a
315	GSSPFG00004707001	GSSPFG00004707001-RA_6158-6537	scaffold_2723_11025	290	296	29154	1a	x	1a
316	GSSPFG00015916001	GSSPFG00015916001-RA_5759-6329	scaffold_2723_11025	211	217	29226	1a	x	1a
317	GSSPFG00014206001	GSSPFG00014206001-RA_4522-6076	scaffold_2723_11025	499	505	29342	1a	x	1a
318	GSSPFG00014206001	GSSPFG00014206001-RA_4522-6076	scaffold_2723_11025	694	700	29343	1a	x	1a
319	GSSPFG00000424001	GSSPFG00000424001-RA_3484-4025	scaffold_2723_11025	233	239	29358	1a	x	1a
320	GSSPFG00020388001	GSSPFG00020388001-RA_41807-42110	scaffold_2723_11025	83	89	29377	1a	x	1a
321	GSSPFG00028295001	GSSPFG00028295001-RA_2559-3471	scaffold_2723_11025	867	873	29812	1a	x	1a
322	GSSPFG00020604001	GSSPFG00020604001-RA_6584-7631	scaffold_2723_11025	610	616	29893	1a	x	1a
323	GSSPFG00032600001	GSSPFG00032600001-RA_9252-9891	scaffold_2723_11025	171	177	29919	1a	x	1a
324	GSSPFG00033914001	GSSPFG00033914001-RA_1035-1642	scaffold_2723_11025	477	483	29990	m8	x	m8
325	GSSPFG00034409001	GSSPFG00034409001-RA_62372-62917	scaffold_2723_11025	211	217	30126	m8	x	m8
326	GSSPFG00035551001	GSSPFG00035551001.3-RA_2805-5095	scaffold_2723_11025	469	475	30197	1a	x	1a
327	GSSPFG00003093001	GSSPFG00003093001-RA_6899-7160	scaffold_2723_11025	57	63	30341	8mer	x	8mer
328	GSSPFG00009826001	GSSPFG00009826001-RA_2889-4063	scaffold_2723_11025	716	722	30392	1a	x	1a
329	GSSPFG00015494001	GSSPFG00015494001-RA_2243-2429	scaffold_2723_11025	118	124	30485	1a	x	1a
330	GSSPFG00024821001	GSSPFG00024821001-RA_7944-8795	scaffold_2723_11025	115	121	30640	1a	x	1a
331	GSSPFG00026411001	GSSPFG00026411001-RA_5221-5876	scaffold_2723_11025	286	292	30883	8mer	x	8mer
332	GSSPFG00011499001	GSSPFG00011499001-RA_8349-9634	scaffold_2723_11025	132	138	30916	1a	x	1a
333	GSSPFG00026400001	GSSPFG00026400001.2-RA_5108-6311	scaffold_2723_11025	806	812	30935	1a	x	1a
334	GSSPFG00009996001	GSSPFG00009996001-RA_6622-7680	scaffold_2723_11025	905	911	30959	1a	x	1a
335	GSSPFG00021397001	GSSPFG00021397001-RA_2941-3524	scaffold_2723_11025	89	95	31043	1a	x	1a
336	GSSPFG00022455001	GSSPFG00022455001-RA_79484-80390	scaffold_2723_11025	887	893	31384	8mer	x	8mer
337	GSSPFG00022311001	GSSPFG00022311001-RA_131266-131514	scaffold_2723_11025	67	73	31408	1a	x	1a
338	GSSPFG00022314001	GSSPFG00022314001-RA_216217-216802	scaffold_2723_11025	375	381	31453	1a	x	1a
339	GSSPFG00007747001	GSSPFG00007747001-RA_4272-4562	scaffold_2723_11025	9	15	31470	1a	x	1a
340	GSSPFG00035561001	GSSPFG00035561001.3-RA_4653-6703	scaffold_2723_11025	1358	1364	31552	m8	x	m8
341	GSSPFG00033481001	GSSPFG00033481001-RA_5476-6485	scaffold_2723_11025	433	439	31700	1a	x	1a
342	GSSPFG00025235001	GSSPFG00025235001-RA_123369-124177	scaffold_2723_11025	9	15	31853	1a	x	1a
[truncated: 247 more rows]

## Sheet: MiRanda
miR34
number	gene target	miR	target_UTR3	score	tot energy	positions on Seq1	Positions on Seq2	length of heteroduplex	% of Seq1	% of Seq2
1	GSSPFG00015870001	>scaffold_23013_23354	GSSPFG00015870001-RA_20813-21706	136.00	-21.43	3 17	319341	14	78.57%	100.00%
2	GSSPFG00015870001	>scaffold_23013_23354	GSSPFG00015870001-RA_20813-21706	129.00	-17.49	2 22	702724	20	65.00%	70.00%
3	GSSPFG00015870001	>scaffold_23013_23354	GSSPFG00015870001-RA_20813-21706	111.00	-20.17	2 22	363389	24	66.67%	75.00%
4	GSSPFG00004305001	>scaffold_23013_23354	GSSPFG00004305001-RA_2960-3928	123.00	-20.67	2 21	252275	20	55.00%	80.00%
5	GSSPFG00034587001	>scaffold_23013_23354	GSSPFG00034587001-RA_54899-55682	109.00	-18.80	2 22	491513	22	63.64%	81.82%
6	GSSPFG00034587001	>scaffold_23013_23354	GSSPFG00034587001-RA_54899-55682	101.00	-17.27	4 19	518541	16	56.25%	87.50%
7	GSSPFG00034587001	>scaffold_23013_23354	GSSPFG00034587001-RA_54899-55682	94.00	-17.95	2 21	19 44	22	54.55%	77.27%
8	GSSPFG00034602001	>scaffold_23013_23354	GSSPFG00034602001.3-RA_370938-372821	120.00	-18.12	2 8	17741796	6	100.00%	100.00%
9	GSSPFG00034602001	>scaffold_23013_23354	GSSPFG00034602001.3-RA_370938-372821	116.00	-24.91	5 22	320345	20	70.00%	85.00%
10	GSSPFG00034602001	>scaffold_23013_23354	GSSPFG00034602001.3-RA_370938-372821	111.00	-19.10	4 22	13111335	20	55.00%	80.00%
11	GSSPFG00034602001	>scaffold_23013_23354	GSSPFG00034602001.3-RA_370938-372821	102.00	-17.73	2 21	10121033	19	57.89%	68.42%
12	GSSPFG00034602001	>scaffold_23013_23354	GSSPFG00034602001.3-RA_370938-372821	92.00	-21.49	2 22	456481	23	52.17%	69.57%
13	GSSPFG00034613001	>scaffold_23013_23354	GSSPFG00034613001-RA_554510-555637	154.00	-21.24	2 19	671693	17	64.71%	82.35%
14	GSSPFG00034613001	>scaffold_23013_23354	GSSPFG00034613001-RA_554510-555637	99.00	-19.68	2 21	28 53	22	59.09%	72.73%
15	GSSPFG00014404001	>scaffold_23013_23354	GSSPFG00014404001.3-RA_63815-64791	131.00	-18.37	2 21	84107	20	55.00%	75.00%
16	GSSPFG00014404001	>scaffold_23013_23354	GSSPFG00014404001.3-RA_63815-64791	125.00	-19.14	2 20	210231	18	61.11%	83.33%
17	GSSPFG00014404001	>scaffold_23013_23354	GSSPFG00014404001.3-RA_63815-64791	101.00	-20.62	2 22	839861	20	50.00%	80.00%
18	GSSPFG00014404001	>scaffold_23013_23354	GSSPFG00014404001.3-RA_63815-64791	100.00	-17.85	3 22	457480	20	50.00%	75.00%
19	GSSPFG00014404001	>scaffold_23013_23354	GSSPFG00014404001.3-RA_63815-64791	95.00	-20.69	6 22	762783	16	68.75%	93.75%
20	GSSPFG00014404001	>scaffold_23013_23354	GSSPFG00014404001.3-RA_63815-64791	92.00	-17.17	2 9	541563	7	71.43%	85.71%
21	GSSPFG00009341001	>scaffold_23013_23354	GSSPFG00009341001-RA_124158-125318	98.00	-18.33	2 21	122144	20	60.00%	85.00%
22	GSSPFG00009341001	>scaffold_23013_23354	GSSPFG00009341001-RA_124158-125318	95.00	-20.23	2 21	101125	21	52.38%	71.43%
23	GSSPFG00009341001	>scaffold_23013_23354	GSSPFG00009341001-RA_124158-125318	95.00	-19.95	3 22	548575	24	54.17%	79.17%
24	GSSPFG00009341001	>scaffold_23013_23354	GSSPFG00009341001-RA_124158-125318	95.00	-19.28	2 17	943966	16	68.75%	75.00%
25	GSSPFG00009341001	>scaffold_23013_23354	GSSPFG00009341001-RA_124158-125318	94.00	-18.15	2 21	500526	23	56.52%	73.91%
26	GSSPFG00009346001	>scaffold_23013_23354	GSSPFG00009346001-RA_162030-162777	121.00	-21.33	2 22	550576	24	62.50%	79.17%
27	GSSPFG00009346001	>scaffold_23013_23354	GSSPFG00009346001-RA_162030-162777	115.00	-20.24	2 22	644668	22	63.64%	77.27%
28	GSSPFG00009350001	>scaffold_23013_23354	GSSPFG00009350001-RA_177457-178340	93.00	-24.03	2 22	298320	20	55.00%	80.00%
29	GSSPFG00009356001	>scaffold_23013_23354	GSSPFG00009356001-RA_267765-268921	150.00	-19.52	2 20	866889	19	68.42%	89.47%
30	GSSPFG00009356001	>scaffold_23013_23354	GSSPFG00009356001-RA_267765-268921	130.00	-22.09	2 22	46 70	23	65.22%	78.26%
31	GSSPFG00009356001	>scaffold_23013_23354	GSSPFG00009356001-RA_267765-268921	120.00	-18.49	2 8	80102	6	100.00%	100.00%
32	GSSPFG00009356001	>scaffold_23013_23354	GSSPFG00009356001-RA_267765-268921	106.00	-20.58	2 22	286309	22	63.64%	77.27%
33	GSSPFG00009356001	>scaffold_23013_23354	GSSPFG00009356001-RA_267765-268921	98.00	-17.43	2 20	195219	20	65.00%	70.00%
34	GSSPFG00009360001	>scaffold_23013_23354	GSSPFG00009360001-RA_294594-294824	123.00	-17.51	2 20	83103	18	66.67%	83.33%
35	GSSPFG00009360001	>scaffold_23013_23354	GSSPFG00009360001-RA_294594-294824	112.00	-21.66	5 22	3 26	18	66.67%	88.89%
36	GSSPFG00009360001	>scaffold_23013_23354	GSSPFG00009360001-RA_294594-294824	95.00	-18.71	2 21	172195	20	50.00%	80.00%
37	GSSPFG00009378001	>scaffold_23013_23354	GSSPFG00009378001-RA_485179-485841	117.00	-18.41	3 14	299321	11	72.73%	90.91%
38	GSSPFG00003085001	>scaffold_23013_23354	GSSPFG00003085001-RA_206006-206702	127.00	-20.72	2 22	454475	20	65.00%	75.00%
39	GSSPFG00003085001	>scaffold_23013_23354	GSSPFG00003085001-RA_206006-206702	116.00	-21.97	2 22	386409	21	61.90%	76.19%
40	GSSPFG00010656001	>scaffold_23013_23354	GSSPFG00010656001-RA_53586-54235	136.00	-17.80	2 21	46 68	19	63.16%	84.21%
41	GSSPFG00010656001	>scaffold_23013_23354	GSSPFG00010656001-RA_53586-54235	127.00	-19.09	2 21	191214	20	60.00%	80.00%
42	GSSPFG00010656001	>scaffold_23013_23354	GSSPFG00010656001-RA_53586-54235	113.00	-17.84	2 21	516539	21	57.14%	85.71%
43	GSSPFG00010656001	>scaffold_23013_23354	GSSPFG00010656001-RA_53586-54235	112.00	-24.18	2 22	460483	21	47.62%	85.71%
44	GSSPFG00010656001	>scaffold_23013_23354	GSSPFG00010656001-RA_53586-54235	111.00	-20.75	2 22	267293	24	50.00%	70.83%
45	GSSPFG00010656001	>scaffold_23013_23354	GSSPFG00010656001-RA_53586-54235	99.00	-18.59	5 21	599623	18	66.67%	88.89%
46	GSSPFG00010656001	>scaffold_23013_23354	GSSPFG00010656001-RA_53586-54235	98.00	-19.69	2 19	317339	17	58.82%	76.47%
47	GSSPFG00010656001	>scaffold_23013_23354	GSSPFG00010656001-RA_53586-54235	91.00	-17.77	3 21	300324	20	50.00%	80.00%
48	GSSPFG00010656001	>scaffold_23013_23354	GSSPFG00010656001-RA_53586-54235	91.00	-18.80	5 22	410438	23	65.22%	73.91%
49	GSSPFG00025208001	>scaffold_23013_23354	GSSPFG00025208001-RA_9924-10460	128.00	-23.86	2 22	47 70	21	61.90%	76.19%
50	GSSPFG00025208001	>scaffold_23013_23354	GSSPFG00025208001-RA_9924-10460	105.00	-17.26	5 22	207227	17	70.59%	88.24%
51	GSSPFG00025208001	>scaffold_23013_23354	GSSPFG00025208001-RA_9924-10460	102.00	-18.50	2 21	272294	20	65.00%	85.00%
52	GSSPFG00010982001	>scaffold_23013_23354	GSSPFG00010982001.2-RA_74334-81324	132.00	-21.60	2 22	13741397	21	61.90%	80.95%
53	GSSPFG00010982001	>scaffold_23013_23354	GSSPFG00010982001.2-RA_74334-81324	111.00	-19.78	3 22	10911112	19	63.16%	78.95%
54	GSSPFG00010982001	>scaffold_23013_23354	GSSPFG00010982001.2-RA_74334-81324	107.00	-17.72	2 22	10401065	23	47.83%	82.61%
55	GSSPFG00010982001	>scaffold_23013_23354	GSSPFG00010982001.2-RA_74334-81324	97.00	-17.41	6 22	264286	16	75.00%	81.25%
56	GSSPFG00010982001	>scaffold_23013_23354	GSSPFG00010982001.2-RA_74334-81324	92.00	-18.50	2 22	20222046	22	54.55%	81.82%
57	GSSPFG00010982001	>scaffold_23013_23354	GSSPFG00010982001.2-RA_74334-81324	91.00	-17.72	5 22	11481169	17	64.71%	82.35%
58	GSSPFG00010984001	>scaffold_23013_23354	GSSPFG00010984001-RA_79735-80583	111.00	-19.78	3 22	631652	19	63.16%	78.95%
59	GSSPFG00010984001	>scaffold_23013_23354	GSSPFG00010984001-RA_79735-80583	107.00	-17.72	2 22	580605	23	47.83%	82.61%
60	GSSPFG00010984001	>scaffold_23013_23354	GSSPFG00010984001-RA_79735-80583	91.00	-17.72	5 22	688709	17	64.71%	82.35%
61	GSSPFG00035900001	>scaffold_23013_23354	GSSPFG00035900001.2-RA_84188-86268	143.00	-25.11	2 21	488512	21	71.43%	85.71%
62	GSSPFG00035900001	>scaffold_23013_23354	GSSPFG00035900001.2-RA_84188-86268	132.00	-18.50	2 22	15971620	21	57.14%	85.71%
63	GSSPFG00035900001	>scaffold_23013_23354	GSSPFG00035900001.2-RA_84188-86268	128.00	-19.21	3 22	735758	20	65.00%	80.00%
64	GSSPFG00035900001	>scaffold_23013_23354	GSSPFG00035900001.2-RA_84188-86268	127.00	-17.65	2 20	12041226	18	55.56%	83.33%
65	GSSPFG00035900001	>scaffold_23013_23354	GSSPFG00035900001.2-RA_84188-86268	119.00	-17.97	2 22	15041530	24	54.17%	75.00%
66	GSSPFG00035900001	>scaffold_23013_23354	GSSPFG00035900001.2-RA_84188-86268	113.00	-17.77	4 22	966988	18	61.11%	83.33%
67	GSSPFG00035900001	>scaffold_23013_23354	GSSPFG00035900001.2-RA_84188-86268	111.00	-18.02	2 22	73 98	23	56.52%	78.26%
68	GSSPFG00035900001	>scaffold_23013_23354	GSSPFG00035900001.2-RA_84188-86268	97.00	-22.56	2 22	316338	20	65.00%	75.00%
69	GSSPFG00035900001	>scaffold_23013_23354	GSSPFG00035900001.2-RA_84188-86268	91.00	-19.09	3 21	12231247	20	55.00%	75.00%
70	GSSPFG00025224001	>scaffold_23013_23354	GSSPFG00025224001-RA_3567-4112	125.00	-23.68	2 19	194219	20	60.00%	80.00%
71	GSSPFG00025224001	>scaffold_23013_23354	GSSPFG00025224001-RA_3567-4112	117.00	-19.05	3 22	179201	19	52.63%	73.68%
72	GSSPFG00021909001	>scaffold_23013_23354	GSSPFG00021909001.2-RA_7247-8422	125.00	-20.52	2 22	308332	23	65.22%	78.26%
73	GSSPFG00021909001	>scaffold_23013_23354	GSSPFG00021909001.2-RA_7247-8422	97.00	-17.16	2 22	265287	20	50.00%	75.00%
74	GSSPFG00003229001	>scaffold_23013_23354	GSSPFG00003229001-RA_3086-4620	115.00	-17.06	2 21	259282	20	50.00%	75.00%
75	GSSPFG00015351001	>scaffold_23013_23354	GSSPFG00015351001-RA_4938-5856	93.00	-17.12	5 20	380405	18	66.67%	72.22%
76	GSSPFG00020396001	>scaffold_23013_23354	GSSPFG00020396001-RA_8166-8371	99.00	-18.03	2 21	35 58	20	50.00%	70.00%
77	GSSPFG00010630001	>scaffold_23013_23354	GSSPFG00010630001.2-RA_2109-3724	137.00	-18.64	2 20	376400	20	60.00%	85.00%
78	GSSPFG00010630001	>scaffold_23013_23354	GSSPFG00010630001.2-RA_2109-3724	125.00	-19.67	3 21	878900	19	73.68%	78.95%
79	GSSPFG00010630001	>scaffold_23013_23354	GSSPFG00010630001.2-RA_2109-3724	111.00	-18.37	2 22	11621187	23	60.87%	73.91%
80	GSSPFG00010631001	>scaffold_23013_23354	GSSPFG00010631001-RA_6553-7112	114.00	-18.36	2 22	409429	20	50.00%	75.00%
81	GSSPFG00007627001	>scaffold_23013_23354	GSSPFG00007627001-RA_5141-5325	127.00	-17.92	2 22	106132	24	58.33%	79.17%
82	GSSPFG00023303001	>scaffold_23013_23354	GSSPFG00023303001-RA_2623-3222	108.00	-17.41	3 22	136160	21	57.14%	76.19%
83	GSSPFG00025213001	>scaffold_23013_23354	GSSPFG00025213001.3-RA_59309-62142	137.00	-20.02	3 21	20192039	18	66.67%	83.33%
84	GSSPFG00025213001	>scaffold_23013_23354	GSSPFG00025213001.3-RA_59309-62142	132.00	-17.90	2 17	10631085	15	66.67%	93.33%
85	GSSPFG00025213001	>scaffold_23013_23354	GSSPFG00025213001.3-RA_59309-62142	130.00	-21.84	2 22	341363	21	57.14%	76.19%
86	GSSPFG00025213001	>scaffold_23013_23354	GSSPFG00025213001.3-RA_59309-62142	130.00	-17.96	2 21	14491470	19	57.89%	89.47%
87	GSSPFG00025213001	>scaffold_23013_23354	GSSPFG00025213001.3-RA_59309-62142	125.00	-18.32	4 20	17511772	16	75.00%	87.50%
88	GSSPFG00025213001	>scaffold_23013_23354	GSSPFG00025213001.3-RA_59309-62142	120.00	-20.34	2 21	5 27	19	57.89%	84.21%
89	GSSPFG00025213001	>scaffold_23013_23354	GSSPFG00025213001.3-RA_59309-62142	108.00	-20.42	2 21	317339	19	52.63%	73.68%
90	GSSPFG00025213001	>scaffold_23013_23354	GSSPFG00025213001.3-RA_59309-62142	103.00	-17.99	2 22	16801705	23	56.52%	69.57%
91	GSSPFG00025213001	>scaffold_23013_23354	GSSPFG00025213001.3-RA_59309-62142	102.00	-20.46	2 21	419440	19	63.16%	78.95%
92	GSSPFG00025213001	>scaffold_23013_23354	GSSPFG00025213001.3-RA_59309-62142	100.00	-17.14	2 18	25992624	19	63.16%	78.95%
93	GSSPFG00025213001	>scaffold_23013_23354	GSSPFG00025213001.3-RA_59309-62142	99.00	-17.06	2 16	556579	15	60.00%	80.00%
94	GSSPFG00025213001	>scaffold_23013_23354	GSSPFG00025213001.3-RA_59309-62142	96.00	-17.62	2 22	97122	23	60.87%	65.22%
95	GSSPFG00025213001	>scaffold_23013_23354	GSSPFG00025213001.3-RA_59309-62142	95.00	-18.19	2 22	952973	20	55.00%	75.00%
96	GSSPFG00025213001	>scaffold_23013_23354	GSSPFG00025213001.3-RA_59309-62142	94.00	-19.73	3 19	180202	16	68.75%	87.50%
97	GSSPFG00025213001	>scaffold_23013_23354	GSSPFG00025213001.3-RA_59309-62142	90.00	-19.85	2 22	242265	22	63.64%	72.73%
98	GSSPFG00025216001	>scaffold_23013_23354	GSSPFG00025216001-RA_73966-74772	119.00	-19.22	3 22	430451	19	52.63%	84.21%
99	GSSPFG00025216001	>scaffold_23013_23354	GSSPFG00025216001-RA_73966-74772	98.00	-26.04	2 21	41 64	21	61.90%	80.95%
100	GSSPFG00016236001	>scaffold_23013_23354	GSSPFG00016236001-RA_2018-2794	110.00	-18.16	4 19	487509	15	60.00%	73.33%
101	GSSPFG00016236001	>scaffold_23013_23354	GSSPFG00016236001-RA_2018-2794	91.00	-17.61	2 20	216238	18	50.00%	72.22%
102	GSSPFG00031627001	>scaffold_23013_23354	GSSPFG00031627001-RA_1898-2962	145.00	-18.88	2 10	370392	8	100.00%	100.00%
103	GSSPFG00003345001	>scaffold_23013_23354	GSSPFG00003345001-RA_5028-6040	144.00	-21.71	2 17	56 78	15	66.67%	93.33%
104	GSSPFG00003345001	>scaffold_23013_23354	GSSPFG00003345001-RA_5028-6040	100.00	-19.35	2 22	547570	21	52.38%	80.95%
105	GSSPFG00003345001	>scaffold_23013_23354	GSSPFG00003345001-RA_5028-6040	97.00	-17.49	2 22	38 63	24	62.50%	75.00%
106	GSSPFG00001328001	>scaffold_23013_23354	GSSPFG00001328001-RA_5774-6338	131.00	-19.78	3 22	87112	22	68.18%	81.82%
107	GSSPFG00003705001	>scaffold_23013_23354	GSSPFG00003705001-RA_9373-10016	127.00	-24.38	2 22	416437	20	75.00%	80.00%
108	GSSPFG00002785001	>scaffold_23013_23354	GSSPFG00002785001-RA_7933-8661	98.00	-17.28	4 22	13 33	18	55.56%	77.78%
109	GSSPFG00002606001	>scaffold_23013_23354	GSSPFG00002606001-RA_5092-6300	108.00	-20.91	4 22	215241	22	59.09%	77.27%
110	GSSPFG00002606001	>scaffold_23013_23354	GSSPFG00002606001-RA_5092-6300	100.00	-18.32	2 7	655677	5	100.00%	100.00%
111	GSSPFG00030725001	>scaffold_23013_23354	GSSPFG00030725001.2-RA_9234-10394	160.00	-25.43	2 22	10741098	22	63.64%	81.82%
112	GSSPFG00030725001	>scaffold_23013_23354	GSSPFG00030725001.2-RA_9234-10394	128.00	-18.92	2 17	665687	15	73.33%	80.00%
113	GSSPFG00030725001	>scaffold_23013_23354	GSSPFG00030725001.2-RA_9234-10394	119.00	-21.60	3 12	689711	9	88.89%	100.00%
114	GSSPFG00030725001	>scaffold_23013_23354	GSSPFG00030725001.2-RA_9234-10394	106.00	-18.75	2 20	162185	19	57.89%	73.68%
115	GSSPFG00030725001	>scaffold_23013_23354	GSSPFG00030725001.2-RA_9234-10394	106.00	-17.99	2 16	287310	15	66.67%	80.00%
116	GSSPFG00030725001	>scaffold_23013_23354	GSSPFG00030725001.2-RA_9234-10394	102.00	-22.73	2 21	632659	24	58.33%	75.00%
117	GSSPFG00030725001	>scaffold_23013_23354	GSSPFG00030725001.2-RA_9234-10394	98.00	-18.45	3 22	567590	21	57.14%	71.43%
118	GSSPFG00030729001	>scaffold_23013_23354	GSSPFG00030729001-RA_16690-17121	156.00	-20.16	3 21	412432	18	77.78%	88.89%
119	GSSPFG00020451001	>scaffold_23013_23354	GSSPFG00020451001-RA_892-1416	107.00	-19.33	5 22	249270	17	64.71%	88.24%
120	GSSPFG00009095001	>scaffold_23013_23354	GSSPFG00009095001-RA_37619-38789	128.00	-17.55	2 22	5 29	22	54.55%	68.18%
121	GSSPFG00009095001	>scaffold_23013_23354	GSSPFG00009095001-RA_37619-38789	128.00	-17.48	2 17	147169	15	73.33%	80.00%
122	GSSPFG00009095001	>scaffold_23013_23354	GSSPFG00009095001-RA_37619-38789	92.00	-25.58	3 22	415439	21	52.38%	76.19%
123	GSSPFG00009095001	>scaffold_23013_23354	GSSPFG00009095001-RA_37619-38789	92.00	-20.75	2 19	635660	20	60.00%	75.00%
124	GSSPFG00027996001	>scaffold_23013_23354	GSSPFG00027996001-RA_634-1144	141.00	-25.40	2 22	300321	21	66.67%	80.95%
125	GSSPFG00027996001	>scaffold_23013_23354	GSSPFG00027996001-RA_634-1144	136.00	-21.33	3 22	183208	22	63.64%	72.73%
126	GSSPFG00027996001	>scaffold_23013_23354	GSSPFG00027996001-RA_634-1144	109.00	-17.05	2 14	354376	12	58.33%	100.00%
127	GSSPFG00027996001	>scaffold_23013_23354	GSSPFG00027996001-RA_634-1144	104.00	-17.57	2 8	383405	6	83.33%	100.00%
128	GSSPFG00003230001	>scaffold_23013_23354	GSSPFG00003230001-RA_5424-5764	123.00	-19.90	2 22	101122	20	65.00%	85.00%
129	GSSPFG00003230001	>scaffold_23013_23354	GSSPFG00003230001-RA_5424-5764	111.00	-22.47	2 21	57 81	21	57.14%	76.19%
130	GSSPFG00027360001	>scaffold_23013_23354	GSSPFG00027360001-RA_2768-3952	118.00	-17.28	2 21	567588	19	63.16%	84.21%
131	GSSPFG00027360001	>scaffold_23013_23354	GSSPFG00027360001-RA_2768-3952	113.00	-21.86	2 21	9821004	20	60.00%	85.00%
132	GSSPFG00027360001	>scaffold_23013_23354	GSSPFG00027360001-RA_2768-3952	105.00	-17.13	3 14	632654	11	72.73%	90.91%
133	GSSPFG00027360001	>scaffold_23013_23354	GSSPFG00027360001-RA_2768-3952	103.00	-17.64	3 22	10841110	23	52.17%	78.26%
134	GSSPFG00032010001	>scaffold_23013_23354	GSSPFG00032010001-RA_1995-3147	132.00	-22.82	2 22	510533	21	57.14%	85.71%
135	GSSPFG00029502001	>scaffold_23013_23354	GSSPFG00029502001-RA_110295-111171	93.00	-17.43	2 19	5 28	18	55.56%	77.78%
136	GSSPFG00007078001	>scaffold_23013_23354	GSSPFG00007078001-RA_1032-2184	129.00	-25.52	3 22	258278	19	57.89%	84.21%
137	GSSPFG00007078001	>scaffold_23013_23354	GSSPFG00007078001-RA_1032-2184	109.00	-19.63	2 22	2 22	20	60.00%	80.00%
138	GSSPFG00007078001	>scaffold_23013_23354	GSSPFG00007078001-RA_1032-2184	98.00	-24.05	2 22	318339	21	66.67%	76.19%
139	GSSPFG00007078001	>scaffold_23013_23354	GSSPFG00007078001-RA_1032-2184	97.00	-19.44	2 19	239264	20	50.00%	70.00%
140	GSSPFG00007078001	>scaffold_23013_23354	GSSPFG00007078001-RA_1032-2184	92.00	-17.17	2 22	213236	21	57.14%	66.67%
141	GSSPFG00007078001	>scaffold_23013_23354	GSSPFG00007078001-RA_1032-2184	90.00	-17.33	3 21	283307	20	60.00%	75.00%
142	GSSPFG00029506001	>scaffold_23013_23354	GSSPFG00029506001.3-RA_133945-134553	134.00	-23.44	2 22	115135	20	60.00%	90.00%
143	GSSPFG00029509001	>scaffold_23013_23354	GSSPFG00029509001-RA_139972-141044	133.00	-19.00	2 15	297320	14	71.43%	85.71%
144	GSSPFG00029515001	>scaffold_23013_23354	GSSPFG00029515001-RA_209678-210916	128.00	-23.69	4 21	954973	17	82.35%	82.35%
145	GSSPFG00029515001	>scaffold_23013_23354	GSSPFG00029515001-RA_209678-210916	119.00	-22.73	2 22	58 83	23	56.52%	86.96%
146	GSSPFG00029515001	>scaffold_23013_23354	GSSPFG00029515001-RA_209678-210916	105.00	-17.23	5 22	27 49	17	58.82%	82.35%
147	GSSPFG00029518001	>scaffold_23013_23354	GSSPFG00029518001-RA_218231-219451	131.00	-25.13	2 16	413435	14	64.29%	100.00%
148	GSSPFG00029518001	>scaffold_23013_23354	GSSPFG00029518001-RA_218231-219451	125.00	-18.04	2 18	9951017	16	56.25%	87.50%
149	GSSPFG00029518001	>scaffold_23013_23354	GSSPFG00029518001-RA_218231-219451	104.00	-19.44	2 8	610632	6	83.33%	100.00%
150	GSSPFG00029520001	>scaffold_23013_23354	GSSPFG00029520001-RA_222706-223717	98.00	-20.74	2 21	443467	21	57.14%	80.95%
151	GSSPFG00029520001	>scaffold_23013_23354	GSSPFG00029520001-RA_222706-223717	93.00	-22.57	2 22	637659	20	60.00%	75.00%
152	GSSPFG00011227001	>scaffold_23013_23354	GSSPFG00011227001-RA_132286-132980	101.00	-19.24	2 21	2 24	20	70.00%	75.00%
153	GSSPFG00011227001	>scaffold_23013_23354	GSSPFG00011227001-RA_132286-132980	100.00	-18.83	5 13	13 35	8	100.00%	100.00%
154	GSSPFG00010112001	>scaffold_23013_23354	GSSPFG00010112001-RA_5030-6308	125.00	-17.98	2 22	16 37	21	61.90%	80.95%
155	GSSPFG00010112001	>scaffold_23013_23354	GSSPFG00010112001-RA_5030-6308	117.00	-18.92	2 22	63 85	20	55.00%	80.00%
156	GSSPFG00010112001	>scaffold_23013_23354	GSSPFG00010112001-RA_5030-6308	110.00	-22.35	2 22	141164	22	63.64%	81.82%
157	GSSPFG00010112001	>scaffold_23013_23354	GSSPFG00010112001-RA_5030-6308	110.00	-17.25	2 20	278301	19	57.89%	78.95%
158	GSSPFG00018162001	>scaffold_23013_23354	GSSPFG00018162001-RA_3811-4567	124.00	-21.14	2 22	170197	25	56.00%	72.00%
159	GSSPFG00033209001	>scaffold_23013_23354	GSSPFG00033209001-RA_46665-46878	123.00	-23.31	3 22	91116	22	63.64%	77.27%
160	GSSPFG00025166001	>scaffold_23013_23354	GSSPFG00025166001-RA_3905-4302	113.00	-20.19	2 22	60 81	21	61.90%	80.95%
161	GSSPFG00033217001	>scaffold_23013_23354	GSSPFG00033217001-RA_221156-222695	155.00	-23.10	2 22	715736	20	65.00%	80.00%
162	GSSPFG00033217001	>scaffold_23013_23354	GSSPFG00033217001-RA_221156-222695	125.00	-18.06	4 22	667689	18	66.67%	77.78%
163	GSSPFG00033217001	>scaffold_23013_23354	GSSPFG00033217001-RA_221156-222695	115.00	-21.48	2 21	264289	22	45.45%	77.27%
164	GSSPFG00033217001	>scaffold_23013_23354	GSSPFG00033217001-RA_221156-222695	115.00	-19.02	3 21	11141140	22	59.09%	68.18%
165	GSSPFG00003512001	>scaffold_23013_23354	GSSPFG00003512001-RA_5073-6152	127.00	-22.57	2 22	977998	20	55.00%	85.00%
166	GSSPFG00003512001	>scaffold_23013_23354	GSSPFG00003512001-RA_5073-6152	125.00	-18.90	2 22	886905	20	60.00%	80.00%
167	GSSPFG00003512001	>scaffold_23013_23354	GSSPFG00003512001-RA_5073-6152	111.00	-20.30	2 21	330353	20	65.00%	85.00%
168	GSSPFG00003512001	>scaffold_23013_23354	GSSPFG00003512001-RA_5073-6152	99.00	-20.18	2 22	427454	25	56.00%	72.00%
169	GSSPFG00003512001	>scaffold_23013_23354	GSSPFG00003512001-RA_5073-6152	95.00	-17.02	2 22	207234	25	56.00%	68.00%
170	GSSPFG00003512001	>scaffold_23013_23354	GSSPFG00003512001-RA_5073-6152	90.00	-17.07	6 19	459481	13	76.92%	84.62%
171	GSSPFG00031558001	>scaffold_23013_23354	GSSPFG00031558001-RA_1758-2754	131.00	-18.05	2 19	704726	18	66.67%	77.78%
172	GSSPFG00031558001	>scaffold_23013_23354	GSSPFG00031558001-RA_1758-2754	130.00	-18.27	2 21	268289	19	57.89%	73.68%
173	GSSPFG00003027001	>scaffold_23013_23354	GSSPFG00003027001-RA_1625-2333	99.00	-21.24	2 22	20 47	25	64.00%	76.00%
174	GSSPFG00003863001	>scaffold_23013_23354	GSSPFG00003863001-RA_7470-8318	116.00	-20.09	2 22	215239	22	63.64%	72.73%
175	GSSPFG00003863001	>scaffold_23013_23354	GSSPFG00003863001-RA_7470-8318	108.00	-20.55	3 22	172195	20	65.00%	70.00%
176	GSSPFG00003863001	>scaffold_23013_23354	GSSPFG00003863001-RA_7470-8318	101.00	-17.57	2 20	731757	22	54.55%	72.73%
177	GSSPFG00013578001	>scaffold_23013_23354	GSSPFG00013578001.3-RA_3578-3828	106.00	-21.62	2 21	78104	23	56.52%	73.91%
178	GSSPFG00013578001	>scaffold_23013_23354	GSSPFG00013578001.3-RA_3578-3828	91.00	-19.38	2 22	56 77	20	50.00%	75.00%
179	GSSPFG00019715001	>scaffold_23013_23354	GSSPFG00019715001.2-RA_3331-4003	111.00	-23.81	2 21	24 50	23	56.52%	73.91%
180	GSSPFG00025182001	>scaffold_23013_23354	GSSPFG00025182001-RA_19518-20551	112.00	-17.36	2 21	200220	19	63.16%	84.21%
181	GSSPFG00025182001	>scaffold_23013_23354	GSSPFG00025182001-RA_19518-20551	107.00	-18.25	2 16	295317	14	57.14%	85.71%
182	GSSPFG00025182001	>scaffold_23013_23354	GSSPFG00025182001-RA_19518-20551	92.00	-21.80	6 21	436458	15	66.67%	86.67%
183	GSSPFG00019893001	>scaffold_23013_23354	GSSPFG00019893001-RA_3765-4457	122.00	-17.96	2 21	211232	19	57.89%	78.95%
184	GSSPFG00019893001	>scaffold_23013_23354	GSSPFG00019893001-RA_3765-4457	96.00	-17.15	2 21	510532	19	47.37%	63.16%
185	GSSPFG00016231001	>scaffold_23013_23354	GSSPFG00016231001-RA_4470-4721	119.00	-17.48	2 22	74 95	20	65.00%	80.00%
186	GSSPFG00014959001	>scaffold_23013_23354	GSSPFG00014959001-RA_6610-9214	126.00	-19.10	2 19	771793	17	58.82%	82.35%
187	GSSPFG00014959001	>scaffold_23013_23354	GSSPFG00014959001-RA_6610-9214	93.00	-18.78	2 20	792814	19	63.16%	78.95%
188	GSSPFG00011685001	>scaffold_23013_23354	GSSPFG00011685001-RA_1719-2459	115.00	-20.94	3 22	56 82	23	65.22%	78.26%
189	GSSPFG00011685001	>scaffold_23013_23354	GSSPFG00011685001-RA_1719-2459	106.00	-17.31	2 22	223243	20	55.00%	75.00%
190	GSSPFG00007028001	>scaffold_23013_23354	GSSPFG00007028001-RA_7283-8708	120.00	-17.61	3 19	10561077	16	68.75%	81.25%
191	GSSPFG00007028001	>scaffold_23013_23354	GSSPFG00007028001-RA_7283-8708	97.00	-18.03	5 19	15 38	15	66.67%	80.00%
192	GSSPFG00000308001	>scaffold_23013_23354	GSSPFG00000308001-RA_288-601	119.00	-20.52	2 20	19 41	18	55.56%	72.22%
193	GSSPFG00000308001	>scaffold_23013_23354	GSSPFG00000308001-RA_288-601	108.00	-18.28	2 22	264289	23	52.17%	73.91%
194	GSSPFG00000308001	>scaffold_23013_23354	GSSPFG00000308001-RA_288-601	106.00	-20.10	2 21	221246	22	63.64%	77.27%
195	GSSPFG00007262001	>scaffold_23013_23354	GSSPFG00007262001-RA_6796-7990	115.00	-18.64	4 22	424445	18	55.56%	83.33%
196	GSSPFG00007262001	>scaffold_23013_23354	GSSPFG00007262001-RA_6796-7990	107.00	-18.46	3 21	55 79	20	65.00%	85.00%
197	GSSPFG00007262001	>scaffold_23013_23354	GSSPFG00007262001-RA_6796-7990	104.00	-17.14	3 22	612635	20	70.00%	75.00%
198	GSSPFG00022226001	>scaffold_23013_23354	GSSPFG00022226001-RA_8606-8820	97.00	-20.86	2 22	177199	22	68.18%	77.27%
199	GSSPFG00011239001	>scaffold_23013_23354	GSSPFG00011239001-RA_3955-4851	133.00	-19.45	2 22	180199	20	60.00%	75.00%
200	GSSPFG00011239001	>scaffold_23013_23354	GSSPFG00011239001-RA_3955-4851	101.00	-17.36	3 19	324347	17	64.71%	88.24%
201	GSSPFG00011239001	>scaffold_23013_23354	GSSPFG00011239001-RA_3955-4851	100.00	-18.82	2 7	118140	5	100.00%	100.00%
202	GSSPFG00011239001	>scaffold_23013_23354	GSSPFG00011239001-RA_3955-4851	94.00	-19.83	3 22	637659	20	55.00%	85.00%
203	GSSPFG00016871001	>scaffold_23013_23354	GSSPFG00016871001.3-RA_1942-3464	124.00	-23.08	2 19	10941119	20	65.00%	80.00%
204	GSSPFG00009170001	>scaffold_23013_23354	GSSPFG00009170001.5-RA_73505-73978	116.00	-17.28	2 21	122144	19	52.63%	84.21%
205	GSSPFG00012747001	>scaffold_23013_23354	GSSPFG00012747001-RA_8404-9309	110.00	-19.72	5 21	112136	18	72.22%	88.89%
206	GSSPFG00012753001	>scaffold_23013_23354	GSSPFG00012753001-RA_63507-64330	118.00	-17.10	2 21	119140	19	47.37%	84.21%
207	GSSPFG00013212001	>scaffold_23013_23354	GSSPFG00013212001.3-RA_17627-18540	120.00	-19.45	2 21	482505	20	65.00%	85.00%
208	GSSPFG00011905001	>scaffold_23013_23354	GSSPFG00011905001-RA_4760-5508	144.00	-19.22	2 17	529551	15	73.33%	86.67%
209	GSSPFG00011905001	>scaffold_23013_23354	GSSPFG00011905001-RA_4760-5508	125.00	-17.68	2 22	164185	21	61.90%	80.95%
210	GSSPFG00025391001	>scaffold_23013_23354	GSSPFG00025391001-RA_59783-61058	115.00	-17.49	3 18	1 17	15	73.33%	93.33%
211	GSSPFG00025391001	>scaffold_23013_23354	GSSPFG00025391001-RA_59783-61058	109.00	-20.27	5 22	488510	17	64.71%	82.35%
212	GSSPFG00025391001	>scaffold_23013_23354	GSSPFG00025391001-RA_59783-61058	105.00	-20.11	2 22	368390	20	65.00%	70.00%
213	GSSPFG00025391001	>scaffold_23013_23354	GSSPFG00025391001-RA_59783-61058	105.00	-17.46	4 21	501525	20	65.00%	80.00%
214	GSSPFG00026833001	>scaffold_23013_23354	GSSPFG00026833001-RA_156505-157604	134.00	-17.17	2 20	162185	19	63.16%	73.68%
215	GSSPFG00026833001	>scaffold_23013_23354	GSSPFG00026833001-RA_156505-157604	127.00	-24.26	4 21	68 93	20	65.00%	85.00%
216	GSSPFG00026833001	>scaffold_23013_23354	GSSPFG00026833001-RA_156505-157604	109.00	-18.59	2 22	709731	20	55.00%	85.00%
217	GSSPFG00026833001	>scaffold_23013_23354	GSSPFG00026833001-RA_156505-157604	104.00	-18.61	2 8	1 12	6	83.33%	100.00%
218	GSSPFG00026833001	>scaffold_23013_23354	GSSPFG00026833001-RA_156505-157604	103.00	-21.17	2 17	325349	17	58.82%	76.47%
219	GSSPFG00026833001	>scaffold_23013_23354	GSSPFG00026833001-RA_156505-157604	101.00	-18.71	5 22	10541076	17	64.71%	88.24%
220	GSSPFG00026841001	>scaffold_23013_23354	GSSPFG00026841001-RA_243812-244867	148.00	-18.97	2 21	852874	19	63.16%	84.21%
221	GSSPFG00026841001	>scaffold_23013_23354	GSSPFG00026841001-RA_243812-244867	106.00	-18.09	3 21	94118	20	55.00%	85.00%
222	GSSPFG00026841001	>scaffold_23013_23354	GSSPFG00026841001-RA_243812-244867	105.00	-26.00	2 19	296320	19	52.63%	78.95%
223	GSSPFG00026841001	>scaffold_23013_23354	GSSPFG00026841001-RA_243812-244867	90.00	-18.39	2 19	420442	17	47.06%	76.47%
224	GSSPFG00023380001	>scaffold_23013_23354	GSSPFG00023380001-RA_68246-69191	117.00	-17.46	2 22	251273	20	50.00%	85.00%
225	GSSPFG00023380001	>scaffold_23013_23354	GSSPFG00023380001-RA_68246-69191	90.00	-17.58	2 22	727750	22	63.64%	77.27%
226	GSSPFG00021681001	>scaffold_23013_23354	GSSPFG00021681001-RA_9246-9302	95.00	-17.42	2 22	2 23	20	45.00%	85.00%
227	GSSPFG00010884001	>scaffold_23013_23354	GSSPFG00010884001-RA_528-1132	93.00	-24.08	3 21	368390	19	63.16%	78.95%
228	GSSPFG00003415001	>scaffold_23013_23354	GSSPFG00003415001.3-RA_5942-6658	118.00	-21.27	2 19	126148	17	52.94%	76.47%
229	GSSPFG00003415001	>scaffold_23013_23354	GSSPFG00003415001.3-RA_5942-6658	106.00	-22.81	2 22	107130	22	68.18%	72.73%
230	GSSPFG00011175001	>scaffold_23013_23354	GSSPFG00011175001-RA_4449-5569	94.00	-20.11	3 22	188212	22	59.09%	77.27%
231	GSSPFG00014731001	>scaffold_23013_23354	GSSPFG00014731001-RA_30148-30962	115.00	-17.91	4 12	368390	8	100.00%	100.00%
232	GSSPFG00022887001	>scaffold_23013_23354	GSSPFG00022887001-RA_213-1486	108.00	-18.13	4 19	822848	19	63.16%	73.68%
233	GSSPFG00022887001	>scaffold_23013_23354	GSSPFG00022887001-RA_213-1486	98.00	-17.84	2 21	776800	21	61.90%	76.19%
234	GSSPFG00015906001	>scaffold_23013_23354	GSSPFG00015906001-RA_835-1939	124.00	-19.02	3 22	169192	20	60.00%	80.00%
235	GSSPFG00015906001	>scaffold_23013_23354	GSSPFG00015906001-RA_835-1939	121.00	-22.62	2 22	10031025	20	55.00%	85.00%
236	GSSPFG00033391001	>scaffold_23013_23354	GSSPFG00033391001-RA_37042-37532	106.00	-19.61	2 22	243265	21	57.14%	76.19%
237	GSSPFG00033392001	>scaffold_23013_23354	GSSPFG00033392001-RA_40744-40968	134.00	-18.42	2 21	79104	22	59.09%	77.27%
238	GSSPFG00030084001	>scaffold_23013_23354	GSSPFG00030084001-RA_3425-3751	112.00	-18.53	2 22	128152	22	54.55%	77.27%
239	GSSPFG00030084001	>scaffold_23013_23354	GSSPFG00030084001-RA_3425-3751	107.00	-17.47	4 20	275297	16	62.50%	81.25%
240	GSSPFG00000354001	>scaffold_23013_23354	GSSPFG00000354001-RA_3950-4287	161.00	-24.81	2 20	2 23	18	72.22%	88.89%
241	GSSPFG00015558001	>scaffold_23013_23354	GSSPFG00015558001-RA_2989-4538	118.00	-17.18	2 15	951973	13	76.92%	92.31%
242	GSSPFG00015558001	>scaffold_23013_23354	GSSPFG00015558001-RA_2989-4538	93.00	-17.51	3 22	48 71	22	63.64%	72.73%
243	GSSPFG00033118001	>scaffold_23013_23354	GSSPFG00033118001-RA_52189-53604	135.00	-23.46	2 21	683707	21	66.67%	80.95%
244	GSSPFG00033118001	>scaffold_23013_23354	GSSPFG00033118001-RA_52189-53604	120.00	-17.80	2 22	334357	21	61.90%	80.95%
245	GSSPFG00033118001	>scaffold_23013_23354	GSSPFG00033118001-RA_52189-53604	91.00	-17.10	2 22	362383	20	60.00%	65.00%
246	GSSPFG00033120001	>scaffold_23013_23354	GSSPFG00033120001-RA_57211-57767	92.00	-20.53	5 22	187210	18	66.67%	77.78%
247	GSSPFG00024586001	>scaffold_23013_23354	GSSPFG00024586001-RA_15200-15778	131.00	-23.09	3 22	521542	19	68.42%	84.21%
248	GSSPFG00024586001	>scaffold_23013_23354	GSSPFG00024586001-RA_15200-15778	120.00	-17.59	2 22	542561	20	65.00%	75.00%
249	GSSPFG00024586001	>scaffold_23013_23354	GSSPFG00024586001-RA_15200-15778	98.00	-17.54	2 16	413436	15	66.67%	86.67%
250	GSSPFG00030526001	>scaffold_23013_23354	GSSPFG00030526001-RA_4339-4970	113.00	-17.78	2 22	150172	20	70.00%	75.00%
251	GSSPFG00023803001	>scaffold_23013_23354	GSSPFG00023803001.3-RA_7936-8289	128.00	-19.60	2 13	93115	11	90.91%	90.91%
252	GSSPFG00032940001	>scaffold_23013_23354	GSSPFG00032940001-RA_6742-8088	158.00	-19.63	2 21	824849	22	63.64%	86.36%
253	GSSPFG00017758001	>scaffold_23013_23354	GSSPFG00017758001-RA_8266-8870	101.00	-17.39	3 22	6 28	19	57.89%	78.95%
254	GSSPFG00017758001	>scaffold_23013_23354	GSSPFG00017758001-RA_8266-8870	100.00	-20.31	2 22	507530	21	57.14%	90.48%
255	GSSPFG00017758001	>scaffold_23013_23354	GSSPFG00017758001-RA_8266-8870	93.00	-17.23	2 18	463485	16	68.75%	81.25%
256	GSSPFG00010450001	>scaffold_23013_23354	GSSPFG00010450001-RA_74741-75201	132.00	-17.64	3 14	35 58	12	83.33%	91.67%
257	GSSPFG00010450001	>scaffold_23013_23354	GSSPFG00010450001-RA_74741-75201	90.00	-17.58	3 22	81105	22	63.64%	63.64%
258	GSSPFG00000473001	>scaffold_23013_23354	GSSPFG00000473001-RA_47380-47583	114.00	-17.33	3 15	19 41	12	75.00%	100.00%
259	GSSPFG00000475001	>scaffold_23013_23354	GSSPFG00000475001-RA_65649-66211	118.00	-17.06	2 21	1 19	19	68.42%	78.95%
260	GSSPFG00020343001	>scaffold_23013_23354	GSSPFG00020343001-RA_1504-2278	109.00	-19.22	2 22	744765	21	57.14%	80.95%
261	GSSPFG00020343001	>scaffold_23013_23354	GSSPFG00020343001-RA_1504-2278	105.00	-18.56	2 22	174196	20	45.00%	90.00%
262	GSSPFG00020343001	>scaffold_23013_23354	GSSPFG00020343001-RA_1504-2278	103.00	-17.25	2 22	434461	25	56.00%	68.00%
263	GSSPFG00020343001	>scaffold_23013_23354	GSSPFG00020343001-RA_1504-2278	93.00	-18.85	2 19	374400	21	61.90%	66.67%
264	GSSPFG00015026001	>scaffold_23013_23354	GSSPFG00015026001.2-RA_779-2027	122.00	-17.17	2 15	75 97	13	61.54%	92.31%
265	GSSPFG00015026001	>scaffold_23013_23354	GSSPFG00015026001.2-RA_779-2027	114.00	-17.30	2 20	184208	20	60.00%	80.00%
266	GSSPFG00013702001	>scaffold_23013_23354	GSSPFG00013702001.3-RA_5369-6303	111.00	-17.72	2 22	432453	20	55.00%	80.00%
267	GSSPFG00023827001	>scaffold_23013_23354	GSSPFG00023827001-RA_188817-189823	113.00	-17.66	2 22	35 58	21	66.67%	71.43%
268	GSSPFG00033775001	>scaffold_23013_23354	GSSPFG00033775001-RA_1315-2015	117.00	-21.39	3 22	16 38	19	68.42%	73.68%
269	GSSPFG00033776001	>scaffold_23013_23354	GSSPFG00033776001-RA_5772-6703	123.00	-20.31	3 21	760785	21	61.90%	76.19%
270	GSSPFG00033776001	>scaffold_23013_23354	GSSPFG00033776001-RA_5772-6703	99.00	-17.77	2 22	28 54	24	58.33%	75.00%
271	GSSPFG00033455001	>scaffold_23013_23354	GSSPFG00033455001-RA_7102-8243	137.00	-23.71	3 22	10061028	19	63.16%	89.47%
272	GSSPFG00033455001	>scaffold_23013_23354	GSSPFG00033455001-RA_7102-8243	134.00	-17.29	2 20	847871	20	55.00%	80.00%
273	GSSPFG00032708001	>scaffold_23013_23354	GSSPFG00032708001-RA_4051-4750	109.00	-19.22	3 22	631653	19	52.63%	78.95%
274	GSSPFG00032708001	>scaffold_23013_23354	GSSPFG00032708001-RA_4051-4750	105.00	-17.94	4 19	576599	16	68.75%	81.25%
275	GSSPFG00032358001	>scaffold_23013_23354	GSSPFG00032358001-RA_6238-7285	125.00	-17.89	2 22	59 81	20	55.00%	90.00%
276	GSSPFG00032358001	>scaffold_23013_23354	GSSPFG00032358001-RA_6238-7285	122.00	-19.16	4 21	496517	17	70.59%	82.35%
277	GSSPFG00032358001	>scaffold_23013_23354	GSSPFG00032358001-RA_6238-7285	117.00	-22.01	3 21	321343	19	73.68%	84.21%
278	GSSPFG00032358001	>scaffold_23013_23354	GSSPFG00032358001-RA_6238-7285	90.00	-18.21	2 22	398422	23	52.17%	73.91%
279	GSSPFG00026896001	>scaffold_23013_23354	GSSPFG00026896001-RA_7174-7467	103.00	-22.13	2 22	179204	23	65.22%	73.91%
280	GSSPFG00019044001	>scaffold_23013_23354	GSSPFG00019044001-RA_208-1436	113.00	-19.01	4 20	504525	16	75.00%	87.50%
281	GSSPFG00010330001	>scaffold_23013_23354	GSSPFG00010330001-RA_43545-44190	133.00	-26.13	2 22	1 23	20	55.00%	85.00%
282	GSSPFG00010330001	>scaffold_23013_23354	GSSPFG00010330001-RA_43545-44190	115.00	-19.41	2 22	85112	25	52.00%	72.00%
283	GSSPFG00010330001	>scaffold_23013_23354	GSSPFG00010330001-RA_43545-44190	113.00	-21.88	4 20	552573	16	68.75%	93.75%
284	GSSPFG00010330001	>scaffold_23013_23354	GSSPFG00010330001-RA_43545-44190	109.00	-21.32	4 22	428450	18	55.56%	83.33%
285	GSSPFG00010330001	>scaffold_23013_23354	GSSPFG00010330001-RA_43545-44190	105.00	-18.92	4 22	209231	18	55.56%	77.78%
286	GSSPFG00010330001	>scaffold_23013_23354	GSSPFG00010330001-RA_43545-44190	101.00	-17.27	2 22	327349	20	50.00%	80.00%
287	GSSPFG00010330001	>scaffold_23013_23354	GSSPFG00010330001-RA_43545-44190	101.00	-21.27	2 22	491513	20	55.00%	75.00%
288	GSSPFG00010330001	>scaffold_23013_23354	GSSPFG00010330001-RA_43545-44190	100.00	-19.41	2 22	392415	21	52.38%	66.67%
289	GSSPFG00010330001	>scaffold_23013_23354	GSSPFG00010330001-RA_43545-44190	90.00	-22.22	5 21	56 77	16	68.75%	81.25%
290	GSSPFG00006731001	>scaffold_23013_23354	GSSPFG00006731001-RA_8065-8955	128.00	-17.80	2 19	835856	17	64.71%	88.24%
291	GSSPFG00006731001	>scaffold_23013_23354	GSSPFG00006731001-RA_8065-8955	123.00	-21.67	2 21	219243	21	66.67%	80.95%
292	GSSPFG00006731001	>scaffold_23013_23354	GSSPFG00006731001-RA_8065-8955	118.00	-18.15	2 16	673696	15	60.00%	86.67%
293	GSSPFG00003952001	>scaffold_23013_23354	GSSPFG00003952001-RA_3198-5041	132.00	-21.25	2 22	15881611	21	52.38%	76.19%
294	GSSPFG00003952001	>scaffold_23013_23354	GSSPFG00003952001-RA_3198-5041	112.00	-20.64	2 18	11891212	17	64.71%	82.35%
295	GSSPFG00003952001	>scaffold_23013_23354	GSSPFG00003952001-RA_3198-5041	111.00	-19.10	3 22	916937	19	52.63%	89.47%
296	GSSPFG00023260001	>scaffold_23013_23354	GSSPFG00023260001-RA_4228-4324	93.00	-18.54	5 20	4 25	15	73.33%	86.67%
297	GSSPFG00006624001	>scaffold_23013_23354	GSSPFG00006624001-RA_5686-6453	110.00	-21.18	2 22	282302	20	60.00%	75.00%
298	GSSPFG00018166001	>scaffold_23013_23354	GSSPFG00018166001-RA_11134-12482	104.00	-19.77	2 22	492515	21	52.38%	85.71%
299	GSSPFG00030470001	>scaffold_23013_23354	GSSPFG00030470001-RA_4248-4652	134.00	-17.84	2 22	246266	20	50.00%	85.00%
300	GSSPFG00030470001	>scaffold_23013_23354	GSSPFG00030470001-RA_4248-4652	124.00	-21.95	3 22	73 97	21	52.38%	85.71%
301	GSSPFG00016701001	>scaffold_23013_23354	GSSPFG00016701001-RA_48968-50060	128.00	-18.34	3 22	958981	20	65.00%	80.00%
302	GSSPFG00016701001	>scaffold_23013_23354	GSSPFG00016701001-RA_48968-50060	99.00	-21.19	2 20	209231	18	66.67%	83.33%
303	GSSPFG00016703001	>scaffold_23013_23354	GSSPFG00016703001-RA_62707-63503	113.00	-22.61	2 22	220242	20	50.00%	95.00%
304	GSSPFG00016703001	>scaffold_23013_23354	GSSPFG00016703001-RA_62707-63503	112.00	-17.69	2 22	257280	21	52.38%	80.95%
305	GSSPFG00023808001	>scaffold_23013_23354	GSSPFG00023808001.3-RA_31589-31660	113.00	-18.07	4 18	1 21	14	78.57%	85.71%
306	GSSPFG00023829001	>scaffold_23013_23354	GSSPFG00023829001-RA_207026-208126	111.00	-18.12	2 21	694717	20	60.00%	75.00%
307	GSSPFG00023821001	>scaffold_23013_23354	GSSPFG00023821001-RA_127495-128537	132.00	-20.52	2 22	378401	21	57.14%	71.43%
308	GSSPFG00023821001	>scaffold_23013_23354	GSSPFG00023821001-RA_127495-128537	119.00	-18.98	2 20	955977	18	61.11%	83.33%
309	GSSPFG00023821001	>scaffold_23013_23354	GSSPFG00023821001-RA_127495-128537	117.00	-23.10	2 20	83109	22	68.18%	77.27%
310	GSSPFG00023821001	>scaffold_23013_23354	GSSPFG00023821001-RA_127495-128537	107.00	-17.56	2 22	817843	24	62.50%	75.00%
311	GSSPFG00023821001	>scaffold_23013_23354	GSSPFG00023821001-RA_127495-128537	102.00	-17.56	2 22	346368	21	61.90%	80.95%
312	GSSPFG00023823001	>scaffold_23013_23354	GSSPFG00023823001-RA_156500-156626	122.00	-20.80	2 22	1 28	26	57.69%	76.92%
313	GSSPFG00023834001	>scaffold_23013_23354	GSSPFG00023834001-RA_219597-220440	121.00	-17.29	3 22	551573	19	57.89%	89.47%
314	GSSPFG00023834001	>scaffold_23013_23354	GSSPFG00023834001-RA_219597-220440	101.00	-18.68	3 22	181203	19	63.16%	89.47%
315	GSSPFG00007971001	>scaffold_23013_23354	GSSPFG00007971001-RA_4193-5197	113.00	-17.87	2 21	125145	19	57.89%	84.21%
316	GSSPFG00007972001	>scaffold_23013_23354	GSSPFG00007972001-RA_5525-6020	125.00	-17.73	2 22	77 99	20	60.00%	85.00%
317	GSSPFG00009868001	>scaffold_23013_23354	GSSPFG00009868001-RA_4255-4678	132.00	-18.27	2 22	245268	21	57.14%	85.71%
318	GSSPFG00030323001	>scaffold_23013_23354	GSSPFG00030323001-RA_32024-33090	136.00	-23.81	2 20	169189	18	61.11%	83.33%
319	GSSPFG00030323001	>scaffold_23013_23354	GSSPFG00030323001-RA_32024-33090	125.00	-20.41	2 22	947969	20	60.00%	85.00%
320	GSSPFG00030323001	>scaffold_23013_23354	GSSPFG00030323001-RA_32024-33090	123.00	-19.86	2 21	1 21	20	60.00%	75.00%
321	GSSPFG00030323001	>scaffold_23013_23354	GSSPFG00030323001-RA_32024-33090	120.00	-17.57	2 19	655676	17	58.82%	82.35%
322	GSSPFG00030323001	>scaffold_23013_23354	GSSPFG00030323001-RA_32024-33090	104.00	-19.58	3 20	881901	17	64.71%	76.47%
323	GSSPFG00030328001	>scaffold_23013_23354	GSSPFG00030328001-RA_50226-51163	152.00	-22.73	2 15	447471	15	86.67%	86.67%
324	GSSPFG00030328001	>scaffold_23013_23354	GSSPFG00030328001-RA_50226-51163	105.00	-22.24	3 22	358381	20	60.00%	75.00%
325	GSSPFG00030328001	>scaffold_23013_23354	GSSPFG00030328001-RA_50226-51163	104.00	-20.49	2 22	658683	23	47.83%	73.91%
326	GSSPFG00030328001	>scaffold_23013_23354	GSSPFG00030328001-RA_50226-51163	101.00	-17.42	2 21	179199	19	57.89%	84.21%
327	GSSPFG00030328001	>scaffold_23013_23354	GSSPFG00030328001-RA_50226-51163	100.00	-17.98	2 22	290313	21	47.62%	71.43%
328	GSSPFG00030328001	>scaffold_23013_23354	GSSPFG00030328001-RA_50226-51163	98.00	-17.84	2 20	194219	21	61.90%	71.43%
329	GSSPFG00003426001	>scaffold_23013_23354	GSSPFG00003426001-RA_8731-8802	103.00	-21.28	4 22	43 67	20	60.00%	80.00%
330	GSSPFG00003426001	>scaffold_23013_23354	GSSPFG00003426001-RA_8731-8802	91.00	-17.43	3 21	20 46	22	59.09%	68.18%
331	GSSPFG00012808001	>scaffold_23013_23354	GSSPFG00012808001.3-RA_1615-1680	131.00	-18.67	2 21	38 61	20	55.00%	90.00%
332	GSSPFG00026003001	>scaffold_23013_23354	GSSPFG00026003001-RA_2423-2807	114.00	-20.22	3 22	319339	19	68.42%	78.95%
333	GSSPFG00027913001	>scaffold_23013_23354	GSSPFG00027913001-RA_5247-5419	120.00	-18.11	2 8	34 56	6	100.00%	100.00%
334	GSSPFG00029860001	>scaffold_23013_23354	GSSPFG00029860001-RA_394-509	154.00	-24.05	2 19	1 15	17	76.47%	82.35%
335	GSSPFG00025313001	>scaffold_23013_23354	GSSPFG00025313001-RA_197914-198668	119.00	-20.81	2 21	306330	21	47.62%	80.95%
336	GSSPFG00025313001	>scaffold_23013_23354	GSSPFG00025313001-RA_197914-198668	116.00	-18.38	2 22	214233	20	50.00%	85.00%
337	GSSPFG00025313001	>scaffold_23013_23354	GSSPFG00025313001-RA_197914-198668	115.00	-17.27	2 21	500526	23	43.48%	78.26%
338	GSSPFG00025313001	>scaffold_23013_23354	GSSPFG00025313001-RA_197914-198668	110.00	-18.16	4 19	182204	15	60.00%	73.33%
339	GSSPFG00004564001	>scaffold_23013_23354	GSSPFG00004564001-RA_23070-23180	103.00	-18.40	2 22	44 68	22	59.09%	81.82%
340	GSSPFG00020179001	>scaffold_23013_23354	GSSPFG00020179001-RA_6386-6650	113.00	-21.15	5 22	52 74	17	70.59%	82.35%
341	GSSPFG00004567001	>scaffold_23013_23354	GSSPFG00004567001-RA_34647-35464	98.00	-17.45	2 11	315337	9	66.67%	88.89%
342	GSSPFG00031182001	>scaffold_23013_23354	GSSPFG00031182001-RA_861-1857	128.00	-19.43	2 22	225248	21	52.38%	85.71%
343	GSSPFG00031182001	>scaffold_23013_23354	GSSPFG00031182001-RA_861-1857	102.00	-21.85	3 22	647669	20	65.00%	85.00%
344	GSSPFG00014046001	>scaffold_23013_23354	GSSPFG00014046001-RA_63593-63839	98.00	-20.34	2 21	123145	20	60.00%	85.00%
345	GSSPFG00018715001	>scaffold_23013_23354	GSSPFG00018715001.2-RA_12586-12661	124.00	-21.49	3 20	15 35	17	70.59%	82.35%
346	GSSPFG00018721001	>scaffold_23013_23354	GSSPFG00018721001-RA_83564-83805	126.00	-22.14	3 19	73 95	16	68.75%	81.25%
347	GSSPFG00024173001	>scaffold_23013_23354	GSSPFG00024173001-RA_7576-8316	120.00	-17.92	2 8	348370	6	100.00%	100.00%
348	GSSPFG00024173001	>scaffold_23013_23354	GSSPFG00024173001-RA_7576-8316	113.00	-21.54	3 21	409431	19	68.42%	84.21%
349	GSSPFG00024173001	>scaffold_23013_23354	GSSPFG00024173001-RA_7576-8316	92.00	-17.13	2 21	118140	19	57.89%	78.95%
350	GSSPFG00029417001	>scaffold_23013_23354	GSSPFG00029417001-RA_6633-6679	127.00	-17.46	2 21	8 31	20	65.00%	75.00%
351	GSSPFG00013253001	>scaffold_23013_23354	GSSPFG00013253001-RA_52368-53937	136.00	-23.87	2 21	71 97	23	69.57%	78.26%
352	GSSPFG00016813001	>scaffold_23013_23354	GSSPFG00016813001-RA_6002-6903	105.00	-17.21	4 22	415435	18	66.67%	83.33%
353	GSSPFG00009607001	>scaffold_23013_23354	GSSPFG00009607001-RA_6823-8002	144.00	-24.68	2 21	291311	19	68.42%	89.47%
354	GSSPFG00009607001	>scaffold_23013_23354	GSSPFG00009607001-RA_6823-8002	114.00	-18.28	2 19	11391161	17	52.94%	70.59%
355	GSSPFG00009607001	>scaffold_23013_23354	GSSPFG00009607001-RA_6823-8002	99.00	-19.00	2 16	43 66	15	66.67%	93.33%
356	GSSPFG00020963001	>scaffold_23013_23354	GSSPFG00020963001-RA_192-1122	133.00	-17.21	2 21	767789	20	60.00%	80.00%
357	GSSPFG00020963001	>scaffold_23013_23354	GSSPFG00020963001-RA_192-1122	127.00	-19.73	2 21	783806	20	60.00%	80.00%
358	GSSPFG00020963001	>scaffold_23013_23354	GSSPFG00020963001-RA_192-1122	117.00	-17.97	3 19	130154	18	66.67%	72.22%
359	GSSPFG00020963001	>scaffold_23013_23354	GSSPFG00020963001-RA_192-1122	108.00	-21.05	5 22	670695	20	70.00%	75.00%
360	GSSPFG00020963001	>scaffold_23013_23354	GSSPFG00020963001-RA_192-1122	102.00	-19.97	3 20	531554	18	66.67%	83.33%
361	GSSPFG00022246001	>scaffold_23013_23354	GSSPFG00022246001-RA_84705-86084	102.00	-20.92	2 22	384404	20	55.00%	85.00%
362	GSSPFG00022248001	>scaffold_23013_23354	GSSPFG00022248001-RA_130967-132324	145.00	-19.10	2 18	11021124	16	68.75%	87.50%
363	GSSPFG00022248001	>scaffold_23013_23354	GSSPFG00022248001-RA_130967-132324	117.00	-18.02	3 21	311331	18	66.67%	72.22%
364	GSSPFG00006183001	>scaffold_23013_23354	GSSPFG00006183001-RA_4272-6083	111.00	-18.20	2 21	9811004	20	55.00%	80.00%
365	GSSPFG00006183001	>scaffold_23013_23354	GSSPFG00006183001-RA_4272-6083	102.00	-18.04	2 20	135158	19	63.16%	78.95%
366	GSSPFG00006184001	>scaffold_23013_23354	GSSPFG00006184001-RA_7956-8732	113.00	-20.44	4 22	457479	18	61.11%	83.33%
367	GSSPFG00024634001	>scaffold_23013_23354	GSSPFG00024634001-RA_8111-8576	134.00	-21.54	2 22	207227	20	50.00%	85.00%
368	GSSPFG00024634001	>scaffold_23013_23354	GSSPFG00024634001-RA_8111-8576	109.00	-17.48	2 18	2 25	17	64.71%	82.35%
369	GSSPFG00014546001	>scaffold_23013_23354	GSSPFG00014546001-RA_123991-124835	128.00	-17.62	2 22	462485	23	60.87%	73.91%
370	GSSPFG00014546001	>scaffold_23013_23354	GSSPFG00014546001-RA_123991-124835	107.00	-20.65	4 22	337364	23	60.87%	78.26%
371	GSSPFG00027188001	>scaffold_23013_23354	GSSPFG00027188001-RA_1693-2547	115.00	-23.36	2 22	198219	20	55.00%	85.00%
372	GSSPFG00027188001	>scaffold_23013_23354	GSSPFG00027188001-RA_1693-2547	105.00	-19.24	2 22	182204	20	55.00%	80.00%
373	GSSPFG00017499001	>scaffold_23013_23354	GSSPFG00017499001-RA_153021-153260	101.00	-21.60	3 22	50 73	20	60.00%	85.00%
374	GSSPFG00005684001	>scaffold_23013_23354	GSSPFG00005684001-RA_4417-5427	104.00	-17.91	2 8	83105	6	83.33%	100.00%
375	GSSPFG00005684001	>scaffold_23013_23354	GSSPFG00005684001-RA_4417-5427	100.00	-18.77	2 7	144166	5	100.00%	100.00%
376	GSSPFG00007777001	>scaffold_23013_23354	GSSPFG00007777001.2-RA_4467-5882	118.00	-17.32	2 20	12301253	19	52.63%	78.95%
377	GSSPFG00025115001	>scaffold_23013_23354	GSSPFG00025115001.3-RA_27705-27779	104.00	-23.98	2 22	1 23	21	52.38%	85.71%
378	GSSPFG00027887001	>scaffold_23013_23354	GSSPFG00027887001-RA_143958-145371	119.00	-18.76	3 21	304327	19	63.16%	73.68%
379	GSSPFG00033078001	>scaffold_23013_23354	GSSPFG00033078001-RA_283261-284184	107.00	-18.13	2 22	47 68	20	60.00%	70.00%
380	GSSPFG00000360001	>scaffold_23013_23354	GSSPFG00000360001-RA_67863-68508	122.00	-23.59	2 22	576596	20	55.00%	80.00%
381	GSSPFG00000360001	>scaffold_23013_23354	GSSPFG00000360001-RA_67863-68508	99.00	-17.59	5 22	61 82	17	70.59%	88.24%
382	GSSPFG00031135001	>scaffold_23013_23354	GSSPFG00031135001-RA_65630-66878	135.00	-22.78	2 22	376397	20	70.00%	80.00%
383	GSSPFG00031135001	>scaffold_23013_23354	GSSPFG00031135001-RA_65630-66878	107.00	-17.37	2 20	10391059	18	66.67%	77.78%
384	GSSPFG00031135001	>scaffold_23013_23354	GSSPFG00031135001-RA_65630-66878	90.00	-20.40	2 16	478502	16	56.25%	75.00%
385	GSSPFG00031140001	>scaffold_23013_23354	GSSPFG00031140001-RA_74002-75014	135.00	-22.61	2 22	858879	20	70.00%	80.00%
386	GSSPFG00031140001	>scaffold_23013_23354	GSSPFG00031140001-RA_74002-75014	121.00	-21.08	2 22	580601	21	57.14%	80.95%
387	GSSPFG00031140001	>scaffold_23013_23354	GSSPFG00031140001-RA_74002-75014	102.00	-20.35	2 16	936960	16	56.25%	81.25%
388	GSSPFG00026409001	>scaffold_23013_23354	GSSPFG00026409001-RA_6729-7700	121.00	-17.29	2 22	126148	20	60.00%	80.00%
389	GSSPFG00007076001	>scaffold_23013_23354	GSSPFG00007076001-RA_6370-6968	139.00	-17.46	2 22	527548	20	65.00%	75.00%
390	GSSPFG00007076001	>scaffold_23013_23354	GSSPFG00007076001-RA_6370-6968	126.00	-18.40	4 19	306328	15	66.67%	93.33%
391	GSSPFG00007076001	>scaffold_23013_23354	GSSPFG00007076001-RA_6370-6968	118.00	-22.15	2 22	13 39	24	66.67%	79.17%
392	GSSPFG00009148001	>scaffold_23013_23354	GSSPFG00009148001-RA_6918-8544	138.00	-24.52	2 22	458478	20	55.00%	85.00%
393	GSSPFG00009148001	>scaffold_23013_23354	GSSPFG00009148001-RA_6918-8544	137.00	-19.30	3 22	712734	19	57.89%	78.95%
394	GSSPFG00009148001	>scaffold_23013_23354	GSSPFG00009148001-RA_6918-8544	99.00	-19.18	2 21	278301	20	50.00%	85.00%
395	GSSPFG00009148001	>scaffold_23013_23354	GSSPFG00009148001-RA_6918-8544	93.00	-19.10	2 22	23 46	21	52.38%	76.19%
396	GSSPFG00001106001	>scaffold_23013_23354	GSSPFG00001106001-RA_31910-32945	114.00	-19.47	3 20	528551	18	66.67%	83.33%
397	GSSPFG00001106001	>scaffold_23013_23354	GSSPFG00001106001-RA_31910-32945	108.00	-21.32	2 22	602626	22	59.09%	81.82%
398	GSSPFG00001106001	>scaffold_23013_23354	GSSPFG00001106001-RA_31910-32945	103.00	-17.37	2 22	336363	25	60.00%	76.00%
399	GSSPFG00001108001	>scaffold_23013_23354	GSSPFG00001108001-RA_37002-37539	110.00	-17.37	2 22	96117	21	66.67%	76.19%
400	GSSPFG00001120001	>scaffold_23013_23354	GSSPFG00001120001-RA_181256-181681	123.00	-19.58	2 22	295316	20	50.00%	85.00%
401	GSSPFG00001123001	>scaffold_23013_23354	GSSPFG00001123001-RA_244584-245681	101.00	-17.23	5 14	10771098	9	88.89%	100.00%
402	GSSPFG00001123001	>scaffold_23013_23354	GSSPFG00001123001-RA_244584-245681	94.00	-17.66	2 17	184205	15	66.67%	80.00%
403	GSSPFG00006502001	>scaffold_23013_23354	GSSPFG00006502001.3-RA_71172-72256	99.00	-17.46	2 21	614640	23	56.52%	73.91%
404	GSSPFG00033579001	>scaffold_23013_23354	GSSPFG00033579001-RA_3896-5374	117.00	-18.96	3 19	11471170	17	58.82%	82.35%
405	GSSPFG00028982001	>scaffold_23013_23354	GSSPFG00028982001-RA_7006-7637	131.00	-19.70	2 22	390411	20	55.00%	90.00%
406	GSSPFG00006231001	>scaffold_23013_23354	GSSPFG00006231001-RA_487-1570	164.00	-27.39	2 22	54 77	21	71.43%	80.95%
407	GSSPFG00006231001	>scaffold_23013_23354	GSSPFG00006231001-RA_487-1570	146.00	-24.69	2 20	798821	19	63.16%	73.68%
408	GSSPFG00006231001	>scaffold_23013_23354	GSSPFG00006231001-RA_487-1570	128.00	-21.54	2 21	781803	19	63.16%	73.68%
409	GSSPFG00006231001	>scaffold_23013_23354	GSSPFG00006231001-RA_487-1570	117.00	-23.91	2 21	845868	21	57.14%	76.19%
410	GSSPFG00006231001	>scaffold_23013_23354	GSSPFG00006231001-RA_487-1570	114.00	-19.67	3 22	720740	19	47.37%	84.21%
411	GSSPFG00006231001	>scaffold_23013_23354	GSSPFG00006231001-RA_487-1570	106.00	-17.22	3 22	669689	19	57.89%	78.95%
412	GSSPFG00006231001	>scaffold_23013_23354	GSSPFG00006231001-RA_487-1570	106.00	-20.14	2 22	689711	21	52.38%	80.95%
413	GSSPFG00006231001	>scaffold_23013_23354	GSSPFG00006231001-RA_487-1570	105.00	-19.20	5 22	208228	17	70.59%	88.24%
414	GSSPFG00006231001	>scaffold_23013_23354	GSSPFG00006231001-RA_487-1570	104.00	-18.71	3 19	394419	19	57.89%	84.21%
415	GSSPFG00006231001	>scaffold_23013_23354	GSSPFG00006231001-RA_487-1570	104.00	-18.44	2 17	753775	15	60.00%	73.33%
416	GSSPFG00006231001	>scaffold_23013_23354	GSSPFG00006231001-RA_487-1570	99.00	-19.73	3 21	736761	21	52.38%	71.43%
417	GSSPFG00011597001	>scaffold_23013_23354	GSSPFG00011597001-RA_58182-59347	127.00	-20.40	4 21	62 85	18	77.78%	77.78%
418	GSSPFG00011598001	>scaffold_23013_23354	GSSPFG00011598001-RA_69565-70002	116.00	-19.26	2 18	180204	18	55.56%	77.78%
419	GSSPFG00011598001	>scaffold_23013_23354	GSSPFG00011598001-RA_69565-70002	109.00	-20.10	2 21	201223	20	70.00%	85.00%
420	GSSPFG00011599001	>scaffold_23013_23354	GSSPFG00011599001-RA_77201-78306	113.00	-21.45	2 22	327349	20	75.00%	85.00%
421	GSSPFG00011599001	>scaffold_23013_23354	GSSPFG00011599001-RA_77201-78306	97.00	-18.65	3 20	671692	17	64.71%	82.35%
422	GSSPFG00004681001	>scaffold_23013_23354	GSSPFG00004681001-RA_7591-8472	144.00	-17.51	2 17	486508	15	66.67%	93.33%
423	GSSPFG00004681001	>scaffold_23013_23354	GSSPFG00004681001-RA_7591-8472	135.00	-19.68	2 22	706727	20	70.00%	80.00%
424	GSSPFG00004681001	>scaffold_23013_23354	GSSPFG00004681001-RA_7591-8472	107.00	-17.32	3 16	661683	13	61.54%	92.31%
425	GSSPFG00001172001	>scaffold_23013_23354	GSSPFG00001172001-RA_4689-5917	98.00	-17.02	2 22	44 66	21	47.62%	90.48%
426	GSSPFG00001172001	>scaffold_23013_23354	GSSPFG00001172001-RA_4689-5917	92.00	-17.91	2 21	288310	19	57.89%	78.95%
427	GSSPFG00023060001	>scaffold_23013_23354	GSSPFG00023060001-RA_2805-4142	128.00	-26.18	2 20	386406	18	66.67%	83.33%
428	GSSPFG00023060001	>scaffold_23013_23354	GSSPFG00023060001-RA_2805-4142	119.00	-17.32	2 22	512533	20	60.00%	70.00%
429	GSSPFG00023060001	>scaffold_23013_23354	GSSPFG00023060001-RA_2805-4142	117.00	-18.12	2 22	743765	20	50.00%	85.00%
430	GSSPFG00023060001	>scaffold_23013_23354	GSSPFG00023060001-RA_2805-4142	114.00	-19.22	2 22	368390	21	66.67%	76.19%
431	GSSPFG00023060001	>scaffold_23013_23354	GSSPFG00023060001-RA_2805-4142	108.00	-17.76	2 22	270289	20	60.00%	80.00%
432	GSSPFG00032380001	>scaffold_23013_23354	GSSPFG00032380001-RA_6894-7183	125.00	-20.13	2 20	146171	21	66.67%	76.19%
433	GSSPFG00032380001	>scaffold_23013_23354	GSSPFG00032380001-RA_6894-7183	95.00	-17.17	3 22	131152	19	57.89%	78.95%
434	GSSPFG00032381001	>scaffold_23013_23354	GSSPFG00032381001-RA_7658-7884	146.00	-23.88	2 20	12 36	20	70.00%	80.00%
435	GSSPFG00019860001	>scaffold_23013_23354	GSSPFG00019860001-RA_10276-16819	147.00	-18.25	2 21	383406	20	60.00%	75.00%
436	GSSPFG00019860001	>scaffold_23013_23354	GSSPFG00019860001-RA_10276-16819	122.00	-18.38	2 20	452475	19	73.68%	78.95%
437	GSSPFG00003055001	>scaffold_23013_23354	GSSPFG00003055001-RA_2065-2275	105.00	-18.25	5 22	23 43	17	76.47%	82.35%
438	GSSPFG00003064001	>scaffold_23013_23354	GSSPFG00003064001.2-RA_66234-66712	114.00	-17.49	3 15	27 49	12	75.00%	100.00%
439	GSSPFG00003064001	>scaffold_23013_23354	GSSPFG00003064001.2-RA_66234-66712	111.00	-17.53	2 22	10 35	23	56.52%	78.26%
440	GSSPFG00002795001	>scaffold_23013_23354	GSSPFG00002795001-RA_7220-8245	104.00	-20.46	3 22	165189	21	61.90%	66.67%
441	GSSPFG00013790001	>scaffold_23013_23354	GSSPFG00013790001-RA_58099-59464	123.00	-19.15	3 20	846868	17	64.71%	76.47%
442	GSSPFG00013790001	>scaffold_23013_23354	GSSPFG00013790001-RA_58099-59464	115.00	-21.87	2 22	11921213	20	70.00%	85.00%
443	GSSPFG00013790001	>scaffold_23013_23354	GSSPFG00013790001-RA_58099-59464	112.00	-20.94	2 22	591618	25	56.00%	72.00%
444	GSSPFG00013793001	>scaffold_23013_23354	GSSPFG00013793001-RA_63644-65302	123.00	-23.04	2 21	78102	21	52.38%	80.95%
445	GSSPFG00013793001	>scaffold_23013_23354	GSSPFG00013793001-RA_63644-65302	107.00	-21.18	2 21	938962	21	71.43%	80.95%
446	GSSPFG00013793001	>scaffold_23013_23354	GSSPFG00013793001-RA_63644-65302	100.00	-18.17	2 7	754776	5	100.00%	100.00%
447	GSSPFG00010601001	>scaffold_23013_23354	GSSPFG00010601001-RA_6181-7036	111.00	-17.53	3 22	334358	21	52.38%	90.48%
448	GSSPFG00010601001	>scaffold_23013_23354	GSSPFG00010601001-RA_6181-7036	100.00	-17.07	3 22	653677	21	61.90%	76.19%
449	GSSPFG00011006001	>scaffold_23013_23354	GSSPFG00011006001-RA_853-1266	90.00	-18.75	2 22	24 46	21	61.90%	80.95%
450	GSSPFG00021065001	>scaffold_23013_23354	GSSPFG00021065001-RA_7120-7752	115.00	-20.67	4 22	101126	21	57.14%	80.95%
451	GSSPFG00021065001	>scaffold_23013_23354	GSSPFG00021065001-RA_7120-7752	104.00	-20.50	2 21	153175	19	68.42%	68.42%
452	GSSPFG00006544001	>scaffold_23013_23354	GSSPFG00006544001-RA_5271-6508	117.00	-21.54	2 22	437459	20	65.00%	85.00%
453	GSSPFG00006544001	>scaffold_23013_23354	GSSPFG00006544001-RA_5271-6508	91.00	-18.84	2 22	453474	20	50.00%	75.00%
454	GSSPFG00003522001	>scaffold_23013_23354	GSSPFG00003522001.3-RA_374-618	131.00	-18.86	2 20	1 20	18	61.11%	83.33%
455	GSSPFG00017947001	>scaffold_23013_23354	GSSPFG00017947001-RA_7299-8741	129.00	-21.67	2 22	858880	20	55.00%	80.00%
456	GSSPFG00017947001	>scaffold_23013_23354	GSSPFG00017947001-RA_7299-8741	122.00	-17.88	2 19	504526	17	58.82%	76.47%
457	GSSPFG00017947001	>scaffold_23013_23354	GSSPFG00017947001-RA_7299-8741	103.00	-17.57	3 20	13061328	17	52.94%	76.47%
458	GSSPFG00015661001	>scaffold_23013_23354	GSSPFG00015661001-RA_6324-7077	99.00	-18.38	4 22	163188	21	61.90%	85.71%
459	GSSPFG00018374001	>scaffold_23013_23354	GSSPFG00018374001-RA_6858-7206	105.00	-17.20	2 22	169190	21	57.14%	76.19%
460	GSSPFG00018374001	>scaffold_23013_23354	GSSPFG00018374001-RA_6858-7206	100.00	-19.47	3 22	132155	20	60.00%	80.00%
461	GSSPFG00015709001	>scaffold_23013_23354	GSSPFG00015709001-RA_5378-6386	117.00	-17.99	2 22	858880	20	50.00%	85.00%
462	GSSPFG00015709001	>scaffold_23013_23354	GSSPFG00015709001-RA_5378-6386	111.00	-17.94	4 21	547570	18	66.67%	83.33%
463	GSSPFG00015709001	>scaffold_23013_23354	GSSPFG00015709001-RA_5378-6386	108.00	-17.22	2 22	267290	21	52.38%	76.19%
464	GSSPFG00015709001	>scaffold_23013_23354	GSSPFG00015709001-RA_5378-6386	105.00	-17.86	3 18	590612	15	73.33%	86.67%
465	GSSPFG00015709001	>scaffold_23013_23354	GSSPFG00015709001-RA_5378-6386	104.00	-19.43	3 22	205229	21	61.90%	80.95%
466	GSSPFG00025160001	>scaffold_23013_23354	GSSPFG00025160001-RA_7243-7923	112.00	-20.25	2 22	114138	22	59.09%	81.82%
467	GSSPFG00025160001	>scaffold_23013_23354	GSSPFG00025160001-RA_7243-7923	96.00	-21.34	2 14	431456	15	66.67%	80.00%
468	GSSPFG00025160001	>scaffold_23013_23354	GSSPFG00025160001-RA_7243-7923	93.00	-17.34	2 20	43 65	19	52.63%	73.68%
469	GSSPFG00014480001	>scaffold_23013_23354	GSSPFG00014480001-RA_4420-5729	133.00	-17.70	3 14	73 95	11	81.82%	90.91%
470	GSSPFG00014480001	>scaffold_23013_23354	GSSPFG00014480001-RA_4420-5729	120.00	-17.65	3 21	12261246	18	61.11%	88.89%
471	GSSPFG00014480001	>scaffold_23013_23354	GSSPFG00014480001-RA_4420-5729	116.00	-18.00	2 20	528550	19	52.63%	84.21%
472	GSSPFG00014480001	>scaffold_23013_23354	GSSPFG00014480001-RA_4420-5729	97.00	-21.13	5 22	131150	17	64.71%	76.47%
473	GSSPFG00014480001	>scaffold_23013_23354	GSSPFG00014480001-RA_4420-5729	96.00	-22.91	3 22	280306	23	56.52%	73.91%
474	GSSPFG00029220001	>scaffold_23013_23354	GSSPFG00029220001-RA_1720-2259	140.00	-17.77	2 20	281301	18	72.22%	77.78%
475	GSSPFG00029220001	>scaffold_23013_23354	GSSPFG00029220001-RA_1720-2259	111.00	-18.30	3 22	142168	23	65.22%	73.91%
476	GSSPFG00031884001	>scaffold_23013_23354	GSSPFG00031884001-RA_3482-3879	118.00	-19.15	2 22	315336	21	57.14%	80.95%
477	GSSPFG00031885001	>scaffold_23013_23354	GSSPFG00031885001-RA_3964-4147	124.00	-19.19	2 17	140162	15	80.00%	86.67%
478	GSSPFG00020967001	>scaffold_23013_23354	GSSPFG00020967001-RA_1522-2142	135.00	-20.79	2 17	418441	16	62.50%	87.50%
479	GSSPFG00020967001	>scaffold_23013_23354	GSSPFG00020967001-RA_1522-2142	112.00	-17.27	3 21	410431	19	57.89%	78.95%
480	GSSPFG00020967001	>scaffold_23013_23354	GSSPFG00020967001-RA_1522-2142	102.00	-18.01	2 22	157179	21	52.38%	76.19%
481	GSSPFG00016224001	>scaffold_23013_23354	GSSPFG00016224001-RA_5470-5603	116.00	-19.30	2 22	1 19	20	70.00%	80.00%
482	GSSPFG00002571001	>scaffold_23013_23354	GSSPFG00002571001-RA_16571-17698	96.00	-19.67	2 21	299319	19	63.16%	78.95%
483	GSSPFG00031328001	>scaffold_23013_23354	GSSPFG00031328001-RA_4791-5310	99.00	-19.73	2 19	324345	18	55.56%	83.33%
484	GSSPFG00030950001	>scaffold_23013_23354	GSSPFG00030950001.2-RA_523-755	111.00	-21.82	2 21	174198	21	61.90%	85.71%
485	GSSPFG00026448001	>scaffold_23013_23354	GSSPFG00026448001-RA_5083-6082	112.00	-20.70	2 18	522546	18	66.67%	77.78%
486	GSSPFG00026448001	>scaffold_23013_23354	GSSPFG00026448001-RA_5083-6082	108.00	-17.79	2 22	408434	24	62.50%	70.83%
487	GSSPFG00026448001	>scaffold_23013_23354	GSSPFG00026448001-RA_5083-6082	102.00	-17.61	2 20	794813	18	61.11%	77.78%
488	GSSPFG00026448001	>scaffold_23013_23354	GSSPFG00026448001-RA_5083-6082	94.00	-18.28	2 21	252278	23	56.52%	73.91%
489	GSSPFG00026448001	>scaffold_23013_23354	GSSPFG00026448001-RA_5083-6082	91.00	-21.69	3 22	5 26	19	63.16%	84.21%
490	GSSPFG00026861001	>scaffold_23013_23354	GSSPFG00026861001-RA_904-1744	101.00	-18.95	2 22	667689	20	60.00%	85.00%
491	GSSPFG00026861001	>scaffold_23013_23354	GSSPFG00026861001-RA_904-1744	98.00	-17.41	5 21	106131	19	63.16%	78.95%
492	GSSPFG00026861001	>scaffold_23013_23354	GSSPFG00026861001-RA_904-1744	95.00	-23.57	2 22	184210	24	54.17%	83.33%
493	GSSPFG00027343001	>scaffold_23013_23354	GSSPFG00027343001.3-RA_67664-69155	107.00	-17.42	2 22	683704	20	55.00%	75.00%
494	GSSPFG00027343001	>scaffold_23013_23354	GSSPFG00027343001.3-RA_67664-69155	98.00	-17.49	4 22	11691189	18	61.11%	72.22%
495	GSSPFG00002531001	>scaffold_23013_23354	GSSPFG00002531001-RA_6389-7378	123.00	-19.74	3 22	212236	21	57.14%	85.71%
496	GSSPFG00002531001	>scaffold_23013_23354	GSSPFG00002531001-RA_6389-7378	108.00	-19.26	4 22	370393	19	57.89%	84.21%
497	GSSPFG00002531001	>scaffold_23013_23354	GSSPFG00002531001-RA_6389-7378	107.00	-18.83	2 19	89111	18	61.11%	83.33%
498	GSSPFG00002531001	>scaffold_23013_23354	GSSPFG00002531001-RA_6389-7378	102.00	-17.21	2 21	121142	19	47.37%	78.95%
499	GSSPFG00002531001	>scaffold_23013_23354	GSSPFG00002531001-RA_6389-7378	100.00	-23.79	2 7	174196	5	100.00%	100.00%
500	GSSPFG00018258001	>scaffold_23013_23354	GSSPFG00018258001-RA_5611-7034	136.00	-23.49	2 17	448470	15	80.00%	86.67%
501	GSSPFG00018258001	>scaffold_23013_23354	GSSPFG00018258001-RA_5611-7034	131.00	-22.46	2 22	804825	20	60.00%	85.00%
502	GSSPFG00031427001	>scaffold_23013_23354	GSSPFG00031427001-RA_4449-5404	131.00	-19.68	2 17	501524	16	56.25%	87.50%
503	GSSPFG00031427001	>scaffold_23013_23354	GSSPFG00031427001-RA_4449-5404	101.00	-19.76	5 22	798820	17	58.82%	94.12%
504	GSSPFG00016725001	>scaffold_23013_23354	GSSPFG00016725001-RA_3908-5321	137.00	-22.42	2 18	710732	16	62.50%	81.25%
505	GSSPFG00016725001	>scaffold_23013_23354	GSSPFG00016725001-RA_3908-5321	115.00	-17.92	2 22	10741095	20	55.00%	85.00%
506	GSSPFG00016725001	>scaffold_23013_23354	GSSPFG00016725001-RA_3908-5321	107.00	-17.65	2 21	726750	21	52.38%	85.71%
507	GSSPFG00016725001	>scaffold_23013_23354	GSSPFG00016725001-RA_3908-5321	102.00	-18.95	2 21	12351256	19	57.89%	84.21%
508	GSSPFG00016725001	>scaffold_23013_23354	GSSPFG00016725001-RA_3908-5321	96.00	-17.73	2 19	59 81	18	55.56%	77.78%
509	GSSPFG00014708001	>scaffold_23013_23354	GSSPFG00014708001-RA_53958-54984	153.00	-18.93	2 22	836858	20	60.00%	75.00%
510	GSSPFG00006911001	>scaffold_23013_23354	GSSPFG00006911001-RA_2474-3302	150.00	-22.48	2 16	649672	15	80.00%	80.00%
511	GSSPFG00006696001	>scaffold_23013_23354	GSSPFG00006696001-RA_20775-21612	124.00	-19.88	2 22	318341	21	47.62%	85.71%
512	GSSPFG00006696001	>scaffold_23013_23354	GSSPFG00006696001-RA_20775-21612	100.00	-18.35	2 18	138161	17	58.82%	70.59%
513	GSSPFG00006703001	>scaffold_23013_23354	GSSPFG00006703001-RA_59363-60349	129.00	-21.21	2 20	34 58	20	75.00%	75.00%
514	GSSPFG00006703001	>scaffold_23013_23354	GSSPFG00006703001-RA_59363-60349	121.00	-17.52	3 22	136157	20	60.00%	85.00%
515	GSSPFG00004127001	>scaffold_23013_23354	GSSPFG00004127001-RA_761-1093	124.00	-17.15	2 9	176198	7	85.71%	100.00%
516	GSSPFG00004127001	>scaffold_23013_23354	GSSPFG00004127001-RA_761-1093	108.00	-17.23	2 20	224244	18	61.11%	77.78%
517	GSSPFG00024614001	>scaffold_23013_23354	GSSPFG00024614001-RA_6640-7550	100.00	-18.95	2 22	888911	22	45.45%	72.73%
518	GSSPFG00024614001	>scaffold_23013_23354	GSSPFG00024614001-RA_6640-7550	94.00	-20.51	2 21	66 87	19	47.37%	84.21%
519	GSSPFG00027695001	>scaffold_23013_23354	GSSPFG00027695001-RA_65985-66445	132.00	-17.64	3 14	35 58	12	83.33%	91.67%
520	GSSPFG00027695001	>scaffold_23013_23354	GSSPFG00027695001-RA_65985-66445	90.00	-17.58	3 22	81105	22	63.64%	63.64%
521	GSSPFG00027683001	>scaffold_23013_23354	GSSPFG00027683001-RA_6738-7237	90.00	-19.86	2 21	1 19	19	47.37%	78.95%
522	GSSPFG00027690001	>scaffold_23013_23354	GSSPFG00027690001-RA_36494-37547	104.00	-18.28	3 22	452475	20	65.00%	80.00%
523	GSSPFG00027690001	>scaffold_23013_23354	GSSPFG00027690001-RA_36494-37547	92.00	-17.68	2 22	759782	21	47.62%	76.19%
524	GSSPFG00010963001	>scaffold_23013_23354	GSSPFG00010963001-RA_3146-4563	140.00	-22.07	2 22	12391262	21	61.90%	76.19%
525	GSSPFG00010963001	>scaffold_23013_23354	GSSPFG00010963001-RA_3146-4563	115.00	-20.39	2 22	153179	24	62.50%	75.00%
526	GSSPFG00010963001	>scaffold_23013_23354	GSSPFG00010963001-RA_3146-4563	108.00	-20.37	2 22	740764	22	59.09%	81.82%
527	GSSPFG00028826001	>scaffold_23013_23354	GSSPFG00028826001-RA_2689-4233	138.00	-18.47	2 22	627647	20	60.00%	80.00%
528	GSSPFG00028826001	>scaffold_23013_23354	GSSPFG00028826001-RA_2689-4233	133.00	-18.06	2 19	972995	18	61.11%	77.78%
529	GSSPFG00028826001	>scaffold_23013_23354	GSSPFG00028826001-RA_2689-4233	112.00	-22.79	2 18	474497	17	52.94%	94.12%
530	GSSPFG00028826001	>scaffold_23013_23354	GSSPFG00028826001-RA_2689-4233	112.00	-18.46	2 22	12671290	21	57.14%	76.19%
531	GSSPFG00028826001	>scaffold_23013_23354	GSSPFG00028826001-RA_2689-4233	111.00	-19.38	2 22	688709	20	60.00%	75.00%
532	GSSPFG00028826001	>scaffold_23013_23354	GSSPFG00028826001-RA_2689-4233	107.00	-17.44	3 21	922945	19	68.42%	68.42%
533	GSSPFG00028826001	>scaffold_23013_23354	GSSPFG00028826001-RA_2689-4233	104.00	-17.71	2 8	829851	6	83.33%	100.00%
534	GSSPFG00015507001	>scaffold_23013_23354	GSSPFG00015507001-RA_1195-1806	109.00	-18.59	2 20	341362	18	50.00%	88.89%
535	GSSPFG00015507001	>scaffold_23013_23354	GSSPFG00015507001-RA_1195-1806	100.00	-18.62	2 7	377399	5	100.00%	100.00%
536	GSSPFG00008404001	>scaffold_23013_23354	GSSPFG00008404001-RA_3496-4869	140.00	-18.47	2 19	912933	17	64.71%	88.24%
537	GSSPFG00008404001	>scaffold_23013_23354	GSSPFG00008404001-RA_3496-4869	104.00	-18.76	2 8	923945	6	83.33%	100.00%
538	GSSPFG00008404001	>scaffold_23013_23354	GSSPFG00008404001-RA_3496-4869	103.00	-24.07	2 22	458483	23	56.52%	69.57%
539	GSSPFG00019302001	>scaffold_23013_23354	GSSPFG00019302001-RA_3187-3534	99.00	-18.92	2 18	19 44	19	63.16%	68.42%
540	GSSPFG00019302001	>scaffold_23013_23354	GSSPFG00019302001-RA_3187-3534	98.00	-20.89	2 21	150176	23	60.87%	73.91%
541	GSSPFG00028610001	>scaffold_23013_23354	GSSPFG00028610001.3-RA_26538-26980	123.00	-25.22	2 22	375400	23	52.17%	82.61%
542	GSSPFG00028610001	>scaffold_23013_23354	GSSPFG00028610001.3-RA_26538-26980	94.00	-19.75	2 21	284310	23	56.52%	73.91%
543	GSSPFG00032090001	>scaffold_23013_23354	GSSPFG00032090001-RA_3662-3817	95.00	-17.78	2 22	42 67	23	52.17%	78.26%
544	GSSPFG00028775001	>scaffold_23013_23354	GSSPFG00028775001-RA_2194-2490	107.00	-17.04	3 18	237261	17	58.82%	76.47%
545	GSSPFG00028775001	>scaffold_23013_23354	GSSPFG00028775001-RA_2194-2490	92.00	-20.04	6 22	137163	20	70.00%	75.00%
546	GSSPFG00009644001	>scaffold_23013_23354	GSSPFG00009644001-RA_6186-7325	103.00	-20.31	3 22	496523	24	62.50%	66.67%
547	GSSPFG00030772001	>scaffold_23013_23354	GSSPFG00030772001-RA_150019-151475	125.00	-17.39	2 22	763785	20	65.00%	80.00%
548	GSSPFG00030772001	>scaffold_23013_23354	GSSPFG00030772001-RA_150019-151475	121.00	-17.78	2 18	308330	16	68.75%	87.50%
549	GSSPFG00030772001	>scaffold_23013_23354	GSSPFG00030772001-RA_150019-151475	103.00	-24.37	2 22	621642	20	60.00%	80.00%
550	GSSPFG00030774001	>scaffold_23013_23354	GSSPFG00030774001-RA_155332-156338	94.00	-17.38	5 20	480503	16	68.75%	87.50%
551	GSSPFG00030774001	>scaffold_23013_23354	GSSPFG00030774001-RA_155332-156338	90.00	-18.10	2 20	772796	20	60.00%	75.00%
552	GSSPFG00019809001	>scaffold_23013_23354	GSSPFG00019809001-RA_41620-43227	111.00	-17.99	2 21	14021425	20	55.00%	80.00%
553	GSSPFG00026159001	>scaffold_23013_23354	GSSPFG00026159001-RA_5765-6553	123.00	-19.27	2 21	39 62	20	65.00%	70.00%
554	GSSPFG00026159001	>scaffold_23013_23354	GSSPFG00026159001-RA_5765-6553	119.00	-17.65	2 20	387409	18	55.56%	72.22%
555	GSSPFG00026159001	>scaffold_23013_23354	GSSPFG00026159001-RA_5765-6553	110.00	-18.80	2 20	467491	20	55.00%	80.00%
556	GSSPFG00026159001	>scaffold_23013_23354	GSSPFG00026159001-RA_5765-6553	104.00	-17.02	2 8	257279	6	83.33%	100.00%
557	GSSPFG00018701001	>scaffold_23013_23354	GSSPFG00018701001-RA_1176-1872	132.00	-21.60	2 21	574596	19	57.89%	84.21%
558	GSSPFG00018701001	>scaffold_23013_23354	GSSPFG00018701001-RA_1176-1872	124.00	-23.81	2 22	330355	23	60.87%	78.26%
559	GSSPFG00018701001	>scaffold_23013_23354	GSSPFG00018701001-RA_1176-1872	119.00	-22.22	2 20	45 65	18	66.67%	77.78%
560	GSSPFG00018701001	>scaffold_23013_23354	GSSPFG00018701001-RA_1176-1872	114.00	-23.59	2 21	19 43	21	61.90%	80.95%
561	GSSPFG00018701001	>scaffold_23013_23354	GSSPFG00018701001-RA_1176-1872	111.00	-18.19	2 22	529550	20	60.00%	75.00%
562	GSSPFG00008223001	>scaffold_23013_23354	GSSPFG00008223001-RA_2820-3843	131.00	-17.42	2 20	9911013	18	61.11%	66.67%
563	GSSPFG00008223001	>scaffold_23013_23354	GSSPFG00008223001-RA_2820-3843	105.00	-18.30	2 22	684706	20	55.00%	80.00%
564	GSSPFG00008223001	>scaffold_23013_23354	GSSPFG00008223001-RA_2820-3843	98.00	-22.13	2 21	659681	20	60.00%	85.00%
565	GSSPFG00008223001	>scaffold_23013_23354	GSSPFG00008223001-RA_2820-3843	91.00	-17.54	2 22	543564	20	55.00%	70.00%
566	GSSPFG00009019001	>scaffold_23013_23354	GSSPFG00009019001-RA_6190-7741	105.00	-18.09	4 19	791815	17	64.71%	82.35%
567	GSSPFG00002257001	>scaffold_23013_23354	GSSPFG00002257001-RA_1448-2608	100.00	-20.05	2 21	372395	20	55.00%	85.00%
568	GSSPFG00033193001	>scaffold_23013_23354	GSSPFG00033193001-RA_2778-3790	108.00	-18.31	2 22	594619	23	56.52%	69.57%
569	GSSPFG00033193001	>scaffold_23013_23354	GSSPFG00033193001-RA_2778-3790	103.00	-17.04	2 21	564587	20	60.00%	80.00%
570	GSSPFG00033193001	>scaffold_23013_23354	GSSPFG00033193001-RA_2778-3790	96.00	-18.25	2 22	110129	20	60.00%	80.00%
571	GSSPFG00005790001	>scaffold_23013_23354	GSSPFG00005790001-RA_604-2521	116.00	-23.68	2 22	387410	21	61.90%	76.19%
572	GSSPFG00005790001	>scaffold_23013_23354	GSSPFG00005790001-RA_604-2521	110.00	-21.49	2 16	770793	15	66.67%	86.67%
573	GSSPFG00005790001	>scaffold_23013_23354	GSSPFG00005790001-RA_604-2521	109.00	-21.11	2 22	761783	20	60.00%	80.00%
574	GSSPFG00005790001	>scaffold_23013_23354	GSSPFG00005790001-RA_604-2521	105.00	-18.82	2 22	404426	20	50.00%	85.00%
575	GSSPFG00005790001	>scaffold_23013_23354	GSSPFG00005790001-RA_604-2521	90.00	-17.25	6 22	817837	16	75.00%	81.25%
576	GSSPFG00016226001	>scaffold_23013_23354	GSSPFG00016226001-RA_1625-2026	115.00	-20.05	2 19	34 56	18	66.67%	88.89%
577	GSSPFG00016226001	>scaffold_23013_23354	GSSPFG00016226001-RA_1625-2026	115.00	-18.92	2 21	277301	21	57.14%	80.95%
578	GSSPFG00016226001	>scaffold_23013_23354	GSSPFG00016226001-RA_1625-2026	93.00	-22.54	2 22	302324	20	55.00%	65.00%
579	GSSPFG00006960001	>scaffold_23013_23354	GSSPFG00006960001-RA_8891-9280	130.00	-17.58	2 20	227251	20	55.00%	75.00%
580	GSSPFG00016574001	>scaffold_23013_23354	GSSPFG00016574001-RA_4895-5534	118.00	-18.12	3 16	113137	15	73.33%	80.00%
581	GSSPFG00016574001	>scaffold_23013_23354	GSSPFG00016574001-RA_4895-5534	93.00	-20.04	2 21	199222	21	57.14%	85.71%
582	GSSPFG00000219001	>scaffold_23013_23354	GSSPFG00000219001-RA_3347-4749	144.00	-20.74	2 22	16 40	22	63.64%	77.27%
583	GSSPFG00000219001	>scaffold_23013_23354	GSSPFG00000219001-RA_3347-4749	118.00	-22.34	2 19	691713	17	58.82%	88.24%
584	GSSPFG00000219001	>scaffold_23013_23354	GSSPFG00000219001-RA_3347-4749	95.00	-17.88	2 22	178200	21	57.14%	80.95%
585	GSSPFG00003819001	>scaffold_23013_23354	GSSPFG00003819001-RA_44863-45730	113.00	-17.95	2 22	58 80	20	60.00%	70.00%
586	GSSPFG00031747001	>scaffold_23013_23354	GSSPFG00031747001-RA_6001-6646	96.00	-19.01	2 22	324347	21	57.14%	71.43%
587	GSSPFG00027609001	>scaffold_23013_23354	GSSPFG00027609001-RA_10678-11309	129.00	-21.55	2 16	399420	14	78.57%	92.86%
588	GSSPFG00027609001	>scaffold_23013_23354	GSSPFG00027609001-RA_10678-11309	107.00	-17.03	2 22	123147	22	50.00%	81.82%
589	GSSPFG00027609001	>scaffold_23013_23354	GSSPFG00027609001-RA_10678-11309	96.00	-18.35	2 19	581602	17	70.59%	70.59%
590	GSSPFG00014508001	>scaffold_23013_23354	GSSPFG00014508001-RA_3671-4576	100.00	-18.51	2 20	16 37	19	63.16%	73.68%
591	GSSPFG00017453001	>scaffold_23013_23354	GSSPFG00017453001-RA_1195-2184	125.00	-20.08	3 19	460483	17	70.59%	82.35%
592	GSSPFG00017453001	>scaffold_23013_23354	GSSPFG00017453001-RA_1195-2184	112.00	-21.88	2 22	239263	22	63.64%	77.27%
593	GSSPFG00027612001	>scaffold_23013_23354	GSSPFG00027612001-RA_62487-63772	123.00	-18.29	2 22	243265	21	66.67%	76.19%
594	GSSPFG00027612001	>scaffold_23013_23354	GSSPFG00027612001-RA_62487-63772	119.00	-18.00	3 22	94119	22	63.64%	72.73%
595	GSSPFG00027612001	>scaffold_23013_23354	GSSPFG00027612001-RA_62487-63772	106.00	-18.51	2 20	295318	19	63.16%	84.21%
596	GSSPFG00017422001	>scaffold_23013_23354	GSSPFG00017422001-RA_3797-4820	123.00	-21.93	2 22	143164	20	55.00%	80.00%
597	GSSPFG00017422001	>scaffold_23013_23354	GSSPFG00017422001-RA_3797-4820	111.00	-19.63	3 19	842865	18	72.22%	83.33%
598	GSSPFG00019375001	>scaffold_23013_23354	GSSPFG00019375001.3-RA_1639-1763	113.00	-19.49	2 22	20 42	20	60.00%	85.00%
599	GSSPFG00007683001	>scaffold_23013_23354	GSSPFG00007683001-RA_5869-7051	95.00	-18.73	2 20	525547	18	55.56%	72.22%
600	GSSPFG00007683001	>scaffold_23013_23354	GSSPFG00007683001-RA_5869-7051	92.00	-19.11	5 22	10141039	20	55.00%	85.00%
601	GSSPFG00029758001	>scaffold_23013_23354	GSSPFG00029758001-RA_3266-3642	147.00	-22.44	3 20	278300	17	70.59%	88.24%
602	GSSPFG00029758001	>scaffold_23013_23354	GSSPFG00029758001-RA_3266-3642	107.00	-18.96	2 22	153174	20	70.00%	75.00%
603	GSSPFG00025526001	>scaffold_23013_23354	GSSPFG00025526001-RA_4594-5871	96.00	-17.68	2 21	48 70	19	52.63%	89.47%
604	GSSPFG00012201001	>scaffold_23013_23354	GSSPFG00012201001-RA_3320-3951	111.00	-18.89	5 22	538559	17	70.59%	88.24%
605	GSSPFG00009235001	>scaffold_23013_23354	GSSPFG00009235001-RA_2095-3075	111.00	-18.48	2 22	703724	20	55.00%	80.00%
606	GSSPFG00009235001	>scaffold_23013_23354	GSSPFG00009235001-RA_2095-3075	96.00	-23.62	6 17	717739	11	90.91%	100.00%
607	GSSPFG00008731001	>scaffold_23013_23354	GSSPFG00008731001.2-RA_4393-5301	108.00	-19.37	2 22	720743	21	57.14%	71.43%
608	GSSPFG00029466001	>scaffold_23013_23354	GSSPFG00029466001-RA_637-1155	98.00	-19.87	2 21	468489	19	52.63%	84.21%
609	GSSPFG00012787001	>scaffold_23013_23354	GSSPFG00012787001-RA_4450-4659	104.00	-18.61	2 20	98124	22	59.09%	77.27%
610	GSSPFG00026103001	>scaffold_23013_23354	GSSPFG00026103001-RA_7061-7727	157.00	-24.06	2 22	570592	20	60.00%	80.00%
611	GSSPFG00008521001	>scaffold_23013_23354	GSSPFG00008521001-RA_5358-6824	116.00	-17.12	2 22	13991422	21	61.90%	76.19%
612	GSSPFG00008521001	>scaffold_23013_23354	GSSPFG00008521001-RA_5358-6824	92.00	-17.58	5 22	9901013	18	50.00%	94.44%
613	GSSPFG00015589001	>scaffold_23013_23354	GSSPFG00015589001-RA_6342-7756	117.00	-17.55	5 22	34 56	17	70.59%	88.24%
614	GSSPFG00015589001	>scaffold_23013_23354	GSSPFG00015589001-RA_6342-7756	108.00	-23.35	2 19	288309	17	58.82%	82.35%
615	GSSPFG00015589001	>scaffold_23013_23354	GSSPFG00015589001-RA_6342-7756	95.00	-18.19	2 22	212233	20	50.00%	80.00%
616	GSSPFG00018309001	>scaffold_23013_23354	GSSPFG00018309001-RA_4684-5945	111.00	-23.88	3 22	777803	23	56.52%	69.57%
617	GSSPFG00018309001	>scaffold_23013_23354	GSSPFG00018309001-RA_4684-5945	97.00	-19.62	2 21	107127	19	57.89%	78.95%
618	GSSPFG00031222001	>scaffold_23013_23354	GSSPFG00031222001.3-RA_992-1684	94.00	-19.64	2 16	589612	15	66.67%	80.00%
619	GSSPFG00013202001	>scaffold_23013_23354	GSSPFG00013202001-RA_1938-2949	133.00	-21.34	2 18	406428	16	62.50%	93.75%
620	GSSPFG00013202001	>scaffold_23013_23354	GSSPFG00013202001-RA_1938-2949	110.00	-19.55	2 20	350374	20	60.00%	75.00%
621	GSSPFG00009976001	>scaffold_23013_23354	GSSPFG00009976001.3-RA_15561-16441	136.00	-22.94	2 22	295319	22	50.00%	81.82%
622	GSSPFG00009976001	>scaffold_23013_23354	GSSPFG00009976001.3-RA_15561-16441	129.00	-21.60	2 20	61 86	21	66.67%	80.95%
623	GSSPFG00009976001	>scaffold_23013_23354	GSSPFG00009976001.3-RA_15561-16441	129.00	-21.13	2 20	81106	21	66.67%	80.95%
624	GSSPFG00009976001	>scaffold_23013_23354	GSSPFG00009976001.3-RA_15561-16441	127.00	-19.85	2 22	476500	22	54.55%	86.36%
625	GSSPFG00009976001	>scaffold_23013_23354	GSSPFG00009976001.3-RA_15561-16441	119.00	-19.14	2 22	41 66	23	60.87%	82.61%
626	GSSPFG00009976001	>scaffold_23013_23354	GSSPFG00009976001.3-RA_15561-16441	109.00	-19.51	2 19	214239	20	60.00%	75.00%
627	GSSPFG00009976001	>scaffold_23013_23354	GSSPFG00009976001.3-RA_15561-16441	93.00	-18.51	3 22	406426	19	52.63%	89.47%
628	GSSPFG00009976001	>scaffold_23013_23354	GSSPFG00009976001.3-RA_15561-16441	91.00	-19.56	2 19	107127	17	52.94%	82.35%
629	GSSPFG00009984001	>scaffold_23013_23354	GSSPFG00009984001-RA_70704-71461	95.00	-17.88	2 22	361386	23	52.17%	78.26%
630	GSSPFG00001841001	>scaffold_23013_23354	GSSPFG00001841001-RA_2954-3802	92.00	-19.46	2 22	439464	23	60.87%	73.91%
631	GSSPFG00030336001	>scaffold_23013_23354	GSSPFG00030336001-RA_9519-9757	98.00	-20.89	2 21	75101	23	60.87%	73.91%
632	GSSPFG00030340001	>scaffold_23013_23354	GSSPFG00030340001-RA_43735-44123	99.00	-17.51	4 22	309330	18	61.11%	88.89%
633	GSSPFG00029211001	>scaffold_23013_23354	GSSPFG00029211001-RA_3501-4022	96.00	-17.90	3 22	181200	19	68.42%	78.95%
634	GSSPFG00019545001	>scaffold_23013_23354	GSSPFG00019545001-RA_390-1590	125.00	-17.18	2 18	10201042	16	62.50%	81.25%
635	GSSPFG00019547001	>scaffold_23013_23354	GSSPFG00019547001-RA_5264-6588	119.00	-17.78	2 22	527548	20	60.00%	85.00%
636	GSSPFG00019547001	>scaffold_23013_23354	GSSPFG00019547001-RA_5264-6588	117.00	-18.16	2 20	846867	18	55.56%	77.78%
637	GSSPFG00019547001	>scaffold_23013_23354	GSSPFG00019547001-RA_5264-6588	115.00	-19.67	2 19	385407	18	72.22%	83.33%
638	GSSPFG00019547001	>scaffold_23013_23354	GSSPFG00019547001-RA_5264-6588	102.00	-17.75	2 21	575596	19	52.63%	89.47%
639	GSSPFG00018584001	>scaffold_23013_23354	GSSPFG00018584001.2-RA_6546-7325	116.00	-17.80	2 21	1 17	19	57.89%	73.68%
640	GSSPFG00018584001	>scaffold_23013_23354	GSSPFG00018584001.2-RA_6546-7325	106.00	-17.71	3 20	10 34	19	63.16%	73.68%
641	GSSPFG00018584001	>scaffold_23013_23354	GSSPFG00018584001.2-RA_6546-7325	105.00	-24.91	4 22	211233	18	50.00%	83.33%
642	GSSPFG00019826001	>scaffold_23013_23354	GSSPFG00019826001-RA_26391-27226	127.00	-21.66	2 20	796818	18	61.11%	77.78%
643	GSSPFG00019826001	>scaffold_23013_23354	GSSPFG00019826001-RA_26391-27226	119.00	-22.22	2 21	144170	23	60.87%	73.91%
644	GSSPFG00019826001	>scaffold_23013_23354	GSSPFG00019826001-RA_26391-27226	118.00	-19.12	4 19	447469	15	66.67%	80.00%
645	GSSPFG00019826001	>scaffold_23013_23354	GSSPFG00019826001-RA_26391-27226	111.00	-21.78	3 22	378400	20	65.00%	85.00%
646	GSSPFG00019826001	>scaffold_23013_23354	GSSPFG00019826001-RA_26391-27226	102.00	-17.44	2 20	69 92	19	52.63%	73.68%
647	GSSPFG00019836001	>scaffold_23013_23354	GSSPFG00019836001-RA_66259-66532	94.00	-18.26	2 20	46 69	19	57.89%	73.68%
648	GSSPFG00007012001	>scaffold_23013_23354	GSSPFG00007012001-RA_3132-3986	145.00	-22.79	2 22	753775	20	65.00%	90.00%
649	GSSPFG00025254001	>scaffold_23013_23354	GSSPFG00025254001-RA_2979-4137	132.00	-17.99	2 22	61 84	21	61.90%	80.95%
650	GSSPFG00025254001	>scaffold_23013_23354	GSSPFG00025254001-RA_2979-4137	126.00	-21.51	2 20	181204	19	63.16%	78.95%
651	GSSPFG00025254001	>scaffold_23013_23354	GSSPFG00025254001-RA_2979-4137	114.00	-20.38	2 20	248271	19	63.16%	78.95%
652	GSSPFG00025254001	>scaffold_23013_23354	GSSPFG00025254001-RA_2979-4137	99.00	-19.87	3 22	970994	21	57.14%	85.71%
653	GSSPFG00024975001	>scaffold_23013_23354	GSSPFG00024975001-RA_5463-6252	132.00	-21.58	2 22	333358	23	65.22%	73.91%
654	GSSPFG00016239001	>scaffold_23013_23354	GSSPFG00016239001-RA_36653-37638	127.00	-29.69	2 22	126151	23	56.52%	82.61%
655	GSSPFG00016239001	>scaffold_23013_23354	GSSPFG00016239001-RA_36653-37638	115.00	-20.63	2 21	40 65	22	54.55%	81.82%
656	GSSPFG00011674001	>scaffold_23013_23354	GSSPFG00011674001-RA_2170-2613	91.00	-18.06	2 20	155177	18	50.00%	88.89%
657	GSSPFG00005474001	>scaffold_23013_23354	GSSPFG00005474001-RA_4384-4785	94.00	-17.40	2 15	110132	13	46.15%	100.00%
658	GSSPFG00007002001	>scaffold_23013_23354	GSSPFG00007002001-RA_74637-75242	127.00	-21.56	2 22	109133	22	63.64%	77.27%
659	GSSPFG00007002001	>scaffold_23013_23354	GSSPFG00007002001-RA_74637-75242	114.00	-22.86	3 22	459481	20	70.00%	80.00%
660	GSSPFG00007002001	>scaffold_23013_23354	GSSPFG00007002001-RA_74637-75242	113.00	-18.56	2 19	132155	18	66.67%	77.78%
661	GSSPFG00007002001	>scaffold_23013_23354	GSSPFG00007002001-RA_74637-75242	104.00	-18.53	5 21	170192	16	50.00%	93.75%
662	GSSPFG00030737001	>scaffold_23013_23354	GSSPFG00030737001-RA_5031-6114	103.00	-18.44	2 21	200223	22	63.64%	72.73%
663	GSSPFG00034031001	>scaffold_23013_23354	GSSPFG00034031001-RA_6181-7051	127.00	-21.27	2 22	363384	20	70.00%	85.00%
664	GSSPFG00034031001	>scaffold_23013_23354	GSSPFG00034031001-RA_6181-7051	123.00	-18.14	2 21	60 84	21	57.14%	76.19%
665	GSSPFG00034031001	>scaffold_23013_23354	GSSPFG00034031001-RA_6181-7051	93.00	-17.27	2 22	585607	20	50.00%	70.00%
666	GSSPFG00005047001	>scaffold_23013_23354	GSSPFG00005047001-RA_4470-4586	108.00	-17.13	2 22	90113	21	57.14%	85.71%
667	GSSPFG00005047001	>scaffold_23013_23354	GSSPFG00005047001-RA_4470-4586	107.00	-25.85	2 22	12 34	21	66.67%	85.71%
668	GSSPFG00032339001	>scaffold_23013_23354	GSSPFG00032339001-RA_6292-6900	91.00	-18.97	6 22	260281	16	68.75%	87.50%
669	GSSPFG00006272001	>scaffold_23013_23354	GSSPFG00006272001-RA_2527-3681	128.00	-18.49	2 18	50 73	17	70.59%	82.35%
670	GSSPFG00006272001	>scaffold_23013_23354	GSSPFG00006272001-RA_2527-3681	111.00	-20.21	3 20	463485	17	70.59%	88.24%
671	GSSPFG00006272001	>scaffold_23013_23354	GSSPFG00006272001-RA_2527-3681	107.00	-20.76	2 21	685710	22	54.55%	86.36%
672	GSSPFG00029170001	>scaffold_23013_23354	GSSPFG00029170001-RA_6850-7476	123.00	-19.09	3 22	138162	21	61.90%	80.95%
673	GSSPFG00029170001	>scaffold_23013_23354	GSSPFG00029170001-RA_6850-7476	105.00	-17.56	2 14	480502	12	66.67%	83.33%
674	GSSPFG00029175001	>scaffold_23013_23354	GSSPFG00029175001-RA_1804-2053	97.00	-19.04	2 22	173196	21	61.90%	71.43%
675	GSSPFG00007370001	>scaffold_23013_23354	GSSPFG00007370001-RA_7210-7327	132.00	-21.68	2 22	77101	22	63.64%	77.27%
676	GSSPFG00007370001	>scaffold_23013_23354	GSSPFG00007370001-RA_7210-7327	117.00	-18.66	2 22	41 65	23	65.22%	69.57%
677	GSSPFG00010922001	>scaffold_23013_23354	GSSPFG00010922001.3-RA_3314-4691	110.00	-18.52	2 22	827849	21	57.14%	80.95%
678	GSSPFG00024643001	>scaffold_23013_23354	GSSPFG00024643001-RA_6332-7710	103.00	-20.70	2 22	10211047	24	66.67%	79.17%
679	GSSPFG00014582001	>scaffold_23013_23354	GSSPFG00014582001-RA_2032-3223	123.00	-22.73	2 21	189213	21	52.38%	80.95%
680	GSSPFG00014582001	>scaffold_23013_23354	GSSPFG00014582001-RA_2032-3223	107.00	-19.94	3 18	213234	15	66.67%	86.67%
681	GSSPFG00017629001	>scaffold_23013_23354	GSSPFG00017629001-RA_3545-4668	125.00	-17.70	2 21	820840	19	68.42%	73.68%
682	GSSPFG00017629001	>scaffold_23013_23354	GSSPFG00017629001-RA_3545-4668	99.00	-17.02	2 21	911936	22	59.09%	72.73%
683	GSSPFG00029099001	>scaffold_23013_23354	GSSPFG00029099001-RA_3009-3968	133.00	-21.50	2 22	837859	20	55.00%	85.00%
684	GSSPFG00029099001	>scaffold_23013_23354	GSSPFG00029099001-RA_3009-3968	107.00	-25.92	2 22	347369	21	66.67%	85.71%
685	GSSPFG00029099001	>scaffold_23013_23354	GSSPFG00029099001-RA_3009-3968	92.00	-18.06	2 22	200225	23	52.17%	69.57%
686	GSSPFG00029099001	>scaffold_23013_23354	GSSPFG00029099001-RA_3009-3968	91.00	-19.44	2 22	709735	24	50.00%	75.00%
687	GSSPFG00008372001	>scaffold_23013_23354	GSSPFG00008372001-RA_949-1848	149.00	-27.31	2 19	754777	18	72.22%	88.89%
688	GSSPFG00008372001	>scaffold_23013_23354	GSSPFG00008372001-RA_949-1848	115.00	-22.92	4 22	461482	18	66.67%	88.89%
689	GSSPFG00008372001	>scaffold_23013_23354	GSSPFG00008372001-RA_949-1848	114.00	-19.17	2 20	615638	19	47.37%	78.95%
690	GSSPFG00008372001	>scaffold_23013_23354	GSSPFG00008372001-RA_949-1848	109.00	-20.63	3 21	332357	21	61.90%	85.71%
691	GSSPFG00008372001	>scaffold_23013_23354	GSSPFG00008372001-RA_949-1848	105.00	-17.56	2 22	704725	21	61.90%	71.43%
692	GSSPFG00008372001	>scaffold_23013_23354	GSSPFG00008372001-RA_949-1848	104.00	-18.05	2 22	23 47	22	63.64%	72.73%
693	GSSPFG00008372001	>scaffold_23013_23354	GSSPFG00008372001-RA_949-1848	104.00	-17.70	2 22	234257	21	57.14%	80.95%
694	GSSPFG00008372001	>scaffold_23013_23354	GSSPFG00008372001-RA_949-1848	100.00	-18.49	6 21	833855	15	73.33%	93.33%
695	GSSPFG00008372001	>scaffold_23013_23354	GSSPFG00008372001-RA_949-1848	94.00	-25.75	2 22	199222	22	63.64%	81.82%
696	GSSPFG00015034001	>scaffold_23013_23354	GSSPFG00015034001-RA_5229-7373	105.00	-19.54	2 21	155175	19	57.89%	73.68%
697	GSSPFG00025729001	>scaffold_23013_23354	GSSPFG00025729001-RA_3034-3801	110.00	-20.13	2 20	358383	21	57.14%	76.19%
698	GSSPFG00025729001	>scaffold_23013_23354	GSSPFG00025729001-RA_3034-3801	104.00	-17.18	4 22	420443	19	57.89%	78.95%
699	GSSPFG00005141001	>scaffold_23013_23354	GSSPFG00005141001-RA_42266-43273	110.00	-19.75	2 22	254276	21	57.14%	80.95%
700	GSSPFG00021664001	>scaffold_23013_23354	GSSPFG00021664001-RA_2070-3494	102.00	-19.13	2 22	1 25	24	58.33%	83.33%
701	GSSPFG00017146001	>scaffold_23013_23354	GSSPFG00017146001-RA_2324-2636	96.00	-17.56	2 22	21 45	22	50.00%	77.27%
702	GSSPFG00008937001	>scaffold_23013_23354	GSSPFG00008937001-RA_130821-131586	96.00	-18.33	2 21	306327	20	60.00%	80.00%
703	GSSPFG00007088001	>scaffold_23013_23354	GSSPFG00007088001-RA_5060-5385	91.00	-17.15	2 18	24 46	17	64.71%	82.35%
704	GSSPFG00002775001	>scaffold_23013_23354	GSSPFG00002775001-RA_3024-4074	130.00	-18.68	2 22	581601	20	70.00%	75.00%
705	GSSPFG00002775001	>scaffold_23013_23354	GSSPFG00002775001-RA_3024-4074	114.00	-20.20	3 21	1 25	23	60.87%	69.57%
706	GSSPFG00002345001	>scaffold_23013_23354	GSSPFG00002345001-RA_4364-5379	101.00	-17.62	2 22	168188	20	70.00%	75.00%
707	GSSPFG00006765001	>scaffold_23013_23354	GSSPFG00006765001-RA_68422-70135	131.00	-17.40	2 21	638661	20	55.00%	75.00%
708	GSSPFG00006765001	>scaffold_23013_23354	GSSPFG00006765001-RA_68422-70135	123.00	-24.32	3 21	13161341	21	57.14%	80.95%
709	GSSPFG00006765001	>scaffold_23013_23354	GSSPFG00006765001-RA_68422-70135	121.00	-21.20	2 22	54 78	23	65.22%	82.61%
710	GSSPFG00006765001	>scaffold_23013_23354	GSSPFG00006765001-RA_68422-70135	113.00	-17.83	3 20	623644	17	76.47%	76.47%
711	GSSPFG00006765001	>scaffold_23013_23354	GSSPFG00006765001-RA_68422-70135	112.00	-17.86	3 22	10121036	21	57.14%	80.95%
712	GSSPFG00006765001	>scaffold_23013_23354	GSSPFG00006765001-RA_68422-70135	103.00	-18.32	2 22	581606	23	65.22%	82.61%
713	GSSPFG00003774001	>scaffold_23013_23354	GSSPFG00003774001-RA_2170-2327	116.00	-19.59	2 17	3 25	15	66.67%	86.67%
714	GSSPFG00019676001	>scaffold_23013_23354	GSSPFG00019676001-RA_5903-6668	107.00	-17.98	2 21	466489	20	50.00%	80.00%
715	GSSPFG00019676001	>scaffold_23013_23354	GSSPFG00019676001-RA_5903-6668	104.00	-17.75	2 8	32 54	6	83.33%	100.00%
716	GSSPFG00015149001	>scaffold_23013_23354	GSSPFG00015149001-RA_5242-5795	101.00	-19.35	3 22	20 42	19	63.16%	89.47%
717	GSSPFG00005124001	>scaffold_23013_23354	GSSPFG00005124001-RA_3753-4723	114.00	-18.08	2 21	682706	21	61.90%	80.95%
718	GSSPFG00018662001	>scaffold_23013_23354	GSSPFG00018662001-RA_2204-3347	129.00	-19.66	2 19	512535	18	72.22%	77.78%
719	GSSPFG00018662001	>scaffold_23013_23354	GSSPFG00018662001-RA_2204-3347	102.00	-21.00	2 22	722745	22	59.09%	77.27%
720	GSSPFG00001263001	>scaffold_23013_23354	GSSPFG00001263001-RA_26783-27277	104.00	-20.17	3 22	171195	21	57.14%	71.43%
721	GSSPFG00005645001	>scaffold_23013_23354	GSSPFG00005645001-RA_3154-4575	123.00	-19.99	2 18	853874	16	62.50%	87.50%
722	GSSPFG00005645001	>scaffold_23013_23354	GSSPFG00005645001-RA_3154-4575	93.00	-18.10	2 20	13161338	19	57.89%	68.42%
723	GSSPFG00004597001	>scaffold_23013_23354	GSSPFG00004597001-RA_33982-35362	94.00	-22.05	2 20	605630	21	47.62%	80.95%
724	GSSPFG00004597001	>scaffold_23013_23354	GSSPFG00004597001-RA_33982-35362	92.00	-19.70	2 22	759783	22	50.00%	72.73%
725	GSSPFG00004171001	>scaffold_23013_23354	GSSPFG00004171001-RA_62479-63556	154.00	-20.37	2 22	363385	21	66.67%	80.95%
726	GSSPFG00004171001	>scaffold_23013_23354	GSSPFG00004171001-RA_62479-63556	143.00	-20.05	2 22	9871012	23	60.87%	82.61%
727	GSSPFG00004173001	>scaffold_23013_23354	GSSPFG00004173001-RA_67298-68891	122.00	-23.25	2 22	386406	20	60.00%	75.00%
728	GSSPFG00004173001	>scaffold_23013_23354	GSSPFG00004173001-RA_67298-68891	115.00	-19.66	3 17	11421165	15	60.00%	86.67%
729	GSSPFG00004176001	>scaffold_23013_23354	GSSPFG00004176001-RA_83106-83452	110.00	-20.26	2 22	321341	20	55.00%	80.00%
730	GSSPFG00004176001	>scaffold_23013_23354	GSSPFG00004176001-RA_83106-83452	107.00	-17.36	2 22	282306	22	54.55%	77.27%
731	GSSPFG00004176001	>scaffold_23013_23354	GSSPFG00004176001-RA_83106-83452	106.00	-21.54	2 22	127147	20	60.00%	85.00%
732	GSSPFG00004179001	>scaffold_23013_23354	GSSPFG00004179001-RA_89051-89146	103.00	-18.09	2 20	10 32	18	55.56%	83.33%
733	GSSPFG00004180001	>scaffold_23013_23354	GSSPFG00004180001-RA_91817-93168	138.00	-19.87	2 21	730751	19	73.68%	84.21%
734	GSSPFG00004180001	>scaffold_23013_23354	GSSPFG00004180001-RA_91817-93168	112.00	-18.11	4 22	12581281	19	63.16%	84.21%
735	GSSPFG00019253001	>scaffold_23013_23354	GSSPFG00019253001-RA_5197-5941	111.00	-18.68	2 16	456479	15	66.67%	93.33%
736	GSSPFG00019253001	>scaffold_23013_23354	GSSPFG00019253001-RA_5197-5941	108.00	-17.84	3 22	293312	19	68.42%	78.95%
737	GSSPFG00019253001	>scaffold_23013_23354	GSSPFG00019253001-RA_5197-5941	103.00	-19.41	2 22	179200	20	45.00%	80.00%
738	GSSPFG00019253001	>scaffold_23013_23354	GSSPFG00019253001-RA_5197-5941	98.00	-19.02	2 22	157181	23	60.87%	73.91%
739	GSSPFG00020258001	>scaffold_23013_23354	GSSPFG00020258001-RA_4202-5025	94.00	-18.13	5 21	399420	16	68.75%	87.50%
740	GSSPFG00022815001	>scaffold_23013_23354	GSSPFG00022815001-RA_49930-50894	96.00	-22.14	3 22	891916	22	59.09%	72.73%
741	GSSPFG00023769001	>scaffold_23013_23354	GSSPFG00023769001-RA_5528-6417	113.00	-19.88	5 22	333355	17	64.71%	88.24%
742	GSSPFG00023769001	>scaffold_23013_23354	GSSPFG00023769001-RA_5528-6417	107.00	-18.69	2 19	408429	18	66.67%	83.33%
743	GSSPFG00020899001	>scaffold_23013_23354	GSSPFG00020899001-RA_84148-84217	148.00	-21.77	2 22	37 62	23	60.87%	69.57%
744	GSSPFG00003152001	>scaffold_23013_23354	GSSPFG00003152001-RA_1380-1845	128.00	-20.89	2 22	392416	22	54.55%	81.82%
745	GSSPFG00003152001	>scaffold_23013_23354	GSSPFG00003152001-RA_1380-1845	98.00	-21.63	2 22	111132	21	61.90%	80.95%
746	GSSPFG00003153001	>scaffold_23013_23354	GSSPFG00003153001-RA_5658-6917	112.00	-17.74	2 22	123149	24	58.33%	70.83%
747	GSSPFG00003153001	>scaffold_23013_23354	GSSPFG00003153001-RA_5658-6917	111.00	-19.10	2 21	479503	21	52.38%	80.95%
748	GSSPFG00003153001	>scaffold_23013_23354	GSSPFG00003153001-RA_5658-6917	95.00	-21.50	4 22	497524	23	65.22%	73.91%
749	GSSPFG00024679001	>scaffold_23013_23354	GSSPFG00024679001-RA_5562-6618	135.00	-27.06	2 22	491518	25	64.00%	80.00%
750	GSSPFG00024679001	>scaffold_23013_23354	GSSPFG00024679001-RA_5562-6618	113.00	-20.83	2 22	19 41	20	60.00%	85.00%
751	GSSPFG00001870001	>scaffold_23013_23354	GSSPFG00001870001-RA_57256-58426	120.00	-19.06	2 8	847869	6	100.00%	100.00%
752	GSSPFG00001870001	>scaffold_23013_23354	GSSPFG00001870001-RA_57256-58426	104.00	-17.07	2 22	94119	23	52.17%	69.57%
753	GSSPFG00004713001	>scaffold_23013_23354	GSSPFG00004713001-RA_33124-34202	121.00	-19.06	3 22	540562	19	57.89%	73.68%
754	GSSPFG00004713001	>scaffold_23013_23354	GSSPFG00004713001-RA_33124-34202	112.00	-20.06	2 22	592615	21	57.14%	76.19%
755	GSSPFG00018978001	>scaffold_23013_23354	GSSPFG00018978001-RA_1150-1399	107.00	-18.43	3 22	16 40	21	47.62%	76.19%
756	GSSPFG00018979001	>scaffold_23013_23354	GSSPFG00018979001-RA_5747-5850	124.00	-22.30	2 19	51 72	17	64.71%	82.35%
757	GSSPFG00002197001	>scaffold_23013_23354	GSSPFG00002197001.3-RA_4146-5014	111.00	-17.76	2 22	628653	23	60.87%	73.91%
758	GSSPFG00002197001	>scaffold_23013_23354	GSSPFG00002197001.3-RA_4146-5014	97.00	-18.10	3 15	732756	14	71.43%	85.71%
759	GSSPFG00022134001	>scaffold_23013_23354	GSSPFG00022134001-RA_7353-7493	95.00	-19.42	2 22	65 86	20	60.00%	70.00%
760	GSSPFG00009450001	>scaffold_23013_23354	GSSPFG00009450001-RA_1441-1630	120.00	-20.04	2 8	97119	6	100.00%	100.00%
761	GSSPFG00009450001	>scaffold_23013_23354	GSSPFG00009450001-RA_1441-1630	106.00	-20.21	3 21	90111	18	61.11%	77.78%
762	GSSPFG00009450001	>scaffold_23013_23354	GSSPFG00009450001-RA_1441-1630	99.00	-21.31	2 22	12 37	23	65.22%	82.61%
763	GSSPFG00009450001	>scaffold_23013_23354	GSSPFG00009450001-RA_1441-1630	98.00	-23.87	3 21	63 87	20	65.00%	80.00%
764	GSSPFG00027553001	>scaffold_23013_23354	GSSPFG00027553001-RA_5661-7130	139.00	-18.89	2 22	826847	20	60.00%	80.00%
765	GSSPFG00027553001	>scaffold_23013_23354	GSSPFG00027553001-RA_5661-7130	116.00	-18.69	2 21	729751	19	47.37%	73.68%
766	GSSPFG00027553001	>scaffold_23013_23354	GSSPFG00027553001-RA_5661-7130	109.00	-21.71	2 22	774796	20	60.00%	80.00%
767	GSSPFG00027553001	>scaffold_23013_23354	GSSPFG00027553001-RA_5661-7130	104.00	-22.94	2 22	12291253	22	63.64%	72.73%
768	GSSPFG00011854001	>scaffold_23013_23354	GSSPFG00011854001-RA_2395-2704	109.00	-17.76	4 19	134159	18	72.22%	77.78%
769	GSSPFG00035050001	>scaffold_23013_23354	GSSPFG00035050001.2-RA_4808-7057	128.00	-27.40	2 22	302326	22	59.09%	77.27%
770	GSSPFG00035050001	>scaffold_23013_23354	GSSPFG00035050001.2-RA_4808-7057	112.00	-20.04	2 22	229253	22	54.55%	77.27%
771	GSSPFG00035050001	>scaffold_23013_23354	GSSPFG00035050001.2-RA_4808-7057	112.00	-17.93	2 21	21762196	19	63.16%	84.21%
772	GSSPFG00035050001	>scaffold_23013_23354	GSSPFG00035050001.2-RA_4808-7057	107.00	-18.27	3 20	628651	18	61.11%	83.33%
773	GSSPFG00035050001	>scaffold_23013_23354	GSSPFG00035050001.2-RA_4808-7057	104.00	-21.47	2 21	910933	20	50.00%	80.00%
774	GSSPFG00035050001	>scaffold_23013_23354	GSSPFG00035050001.2-RA_4808-7057	104.00	-22.52	2 22	12551279	22	59.09%	77.27%
775	GSSPFG00035050001	>scaffold_23013_23354	GSSPFG00035050001.2-RA_4808-7057	104.00	-18.11	2 8	18841906	6	83.33%	100.00%
776	GSSPFG00035050001	>scaffold_23013_23354	GSSPFG00035050001.2-RA_4808-7057	104.00	-20.38	2 21	20182040	19	57.89%	78.95%
777	GSSPFG00035050001	>scaffold_23013_23354	GSSPFG00035050001.2-RA_4808-7057	103.00	-17.67	2 22	968989	20	55.00%	70.00%
778	GSSPFG00035050001	>scaffold_23013_23354	GSSPFG00035050001.2-RA_4808-7057	99.00	-17.39	2 21	9901013	20	65.00%	70.00%
779	GSSPFG00035050001	>scaffold_23013_23354	GSSPFG00035050001.2-RA_4808-7057	99.00	-27.65	2 22	12731294	20	55.00%	80.00%
780	GSSPFG00035050001	>scaffold_23013_23354	GSSPFG00035050001.2-RA_4808-7057	98.00	-17.22	2 11	139161	9	66.67%	88.89%
781	GSSPFG00035050001	>scaffold_23013_23354	GSSPFG00035050001.2-RA_4808-7057	93.00	-17.66	5 22	797819	17	52.94%	70.59%
782	GSSPFG00035050001	>scaffold_23013_23354	GSSPFG00035050001.2-RA_4808-7057	93.00	-23.26	2 21	21502173	21	52.38%	76.19%
783	GSSPFG00035050001	>scaffold_23013_23354	GSSPFG00035050001.2-RA_4808-7057	92.00	-17.53	3 22	727751	21	57.14%	80.95%
784	GSSPFG00029949001	>scaffold_23013_23354	GSSPFG00029949001-RA_5008-5256	106.00	-17.29	2 21	144170	23	56.52%	73.91%
785	GSSPFG00030003001	>scaffold_23013_23354	GSSPFG00030003001-RA_1502-2372	144.00	-21.82	2 22	249272	21	61.90%	80.95%
786	GSSPFG00030003001	>scaffold_23013_23354	GSSPFG00030003001-RA_1502-2372	140.00	-24.03	2 21	228250	19	73.68%	78.95%
787	GSSPFG00030003001	>scaffold_23013_23354	GSSPFG00030003001-RA_1502-2372	112.00	-17.92	2 20	208234	22	59.09%	72.73%
788	GSSPFG00030003001	>scaffold_23013_23354	GSSPFG00030003001-RA_1502-2372	110.00	-21.83	2 22	166189	22	59.09%	77.27%
789	GSSPFG00030003001	>scaffold_23013_23354	GSSPFG00030003001-RA_1502-2372	108.00	-18.93	2 22	22 46	22	72.73%	77.27%
790	GSSPFG00030003001	>scaffold_23013_23354	GSSPFG00030003001-RA_1502-2372	106.00	-17.96	2 22	83105	21	47.62%	85.71%
791	GSSPFG00030003001	>scaffold_23013_23354	GSSPFG00030003001-RA_1502-2372	96.00	-18.61	3 22	827851	21	57.14%	76.19%
792	GSSPFG00018009001	>scaffold_23013_23354	GSSPFG00018009001-RA_44088-45230	123.00	-29.22	2 22	752777	23	52.17%	82.61%
793	GSSPFG00020164001	>scaffold_23013_23354	GSSPFG00020164001-RA_2619-3395	136.00	-19.80	3 22	434457	20	60.00%	80.00%
794	GSSPFG00020164001	>scaffold_23013_23354	GSSPFG00020164001-RA_2619-3395	113.00	-20.42	2 22	37 59	20	55.00%	75.00%
795	GSSPFG00020164001	>scaffold_23013_23354	GSSPFG00020164001-RA_2619-3395	104.00	-20.31	2 8	459481	6	83.33%	100.00%
796	GSSPFG00013968001	>scaffold_23013_23354	GSSPFG00013968001-RA_6815-7342	96.00	-19.73	2 22	30 53	21	52.38%	76.19%
797	GSSPFG00003126001	>scaffold_23013_23354	GSSPFG00003126001.3-RA_4531-5761	113.00	-24.07	2 19	7 30	18	61.11%	83.33%
798	GSSPFG00003126001	>scaffold_23013_23354	GSSPFG00003126001.3-RA_4531-5761	91.00	-21.31	2 22	175196	20	65.00%	75.00%
799	GSSPFG00003126001	>scaffold_23013_23354	GSSPFG00003126001.3-RA_4531-5761	90.00	-18.65	3 21	33 54	18	55.56%	77.78%
800	GSSPFG00003141001	>scaffold_23013_23354	GSSPFG00003141001-RA_272952-273072	100.00	-18.53	5 22	1 23	19	63.16%	89.47%
801	GSSPFG00013099001	>scaffold_23013_23354	GSSPFG00013099001-RA_44818-46681	116.00	-22.97	2 22	627650	21	52.38%	85.71%
802	GSSPFG00013099001	>scaffold_23013_23354	GSSPFG00013099001-RA_44818-46681	113.00	-20.87	2 18	272295	17	64.71%	88.24%
803	GSSPFG00013099001	>scaffold_23013_23354	GSSPFG00013099001-RA_44818-46681	109.00	-22.18	2 22	10941116	20	60.00%	80.00%
804	GSSPFG00013099001	>scaffold_23013_23354	GSSPFG00013099001-RA_44818-46681	98.00	-17.78	3 22	650671	20	60.00%	75.00%
805	GSSPFG00013099001	>scaffold_23013_23354	GSSPFG00013099001-RA_44818-46681	98.00	-17.68	2 20	11251149	20	55.00%	80.00%
806	GSSPFG00009733001	>scaffold_23013_23354	GSSPFG00009733001-RA_74488-75763	130.00	-21.46	3 22	9 29	19	68.42%	84.21%
807	GSSPFG00009733001	>scaffold_23013_23354	GSSPFG00009733001-RA_74488-75763	124.00	-20.59	2 21	105127	19	68.42%	78.95%
808	GSSPFG00009733001	>scaffold_23013_23354	GSSPFG00009733001-RA_74488-75763	123.00	-19.80	2 22	70 95	23	60.87%	73.91%
809	GSSPFG00009733001	>scaffold_23013_23354	GSSPFG00009733001-RA_74488-75763	123.00	-17.36	2 22	315336	20	60.00%	75.00%
810	GSSPFG00009733001	>scaffold_23013_23354	GSSPFG00009733001-RA_74488-75763	108.00	-19.24	2 21	810832	19	57.89%	84.21%
811	GSSPFG00009733001	>scaffold_23013_23354	GSSPFG00009733001-RA_74488-75763	106.00	-17.87	2 19	701723	17	64.71%	82.35%
812	GSSPFG00009733001	>scaffold_23013_23354	GSSPFG00009733001-RA_74488-75763	93.00	-17.56	5 14	782804	9	77.78%	88.89%
813	GSSPFG00009733001	>scaffold_23013_23354	GSSPFG00009733001-RA_74488-75763	91.00	-19.60	3 22	648672	21	57.14%	76.19%
814	GSSPFG00029736001	>scaffold_23013_23354	GSSPFG00029736001-RA_2946-3382	100.00	-19.06	4 19	3 27	17	64.71%	82.35%
815	GSSPFG00024631001	>scaffold_23013_23354	GSSPFG00024631001-RA_5161-5525	120.00	-20.45	2 22	199222	21	61.90%	80.95%
816	GSSPFG00011798001	>scaffold_23013_23354	GSSPFG00011798001-RA_5011-5656	130.00	-22.21	2 22	67 89	21	57.14%	90.48%
817	GSSPFG00011798001	>scaffold_23013_23354	GSSPFG00011798001-RA_5011-5656	107.00	-19.72	2 22	157178	20	50.00%	80.00%
818	GSSPFG00016563001	>scaffold_23013_23354	GSSPFG00016563001-RA_4541-4699	93.00	-19.55	2 22	69 92	21	52.38%	76.19%
819	GSSPFG00034034001	>scaffold_23013_23354	GSSPFG00034034001-RA_73940-75269	114.00	-18.54	2 21	12651289	21	57.14%	85.71%
820	GSSPFG00034034001	>scaffold_23013_23354	GSSPFG00034034001-RA_73940-75269	109.00	-20.00	2 22	11681190	20	45.00%	80.00%
821	GSSPFG00034034001	>scaffold_23013_23354	GSSPFG00034034001-RA_73940-75269	91.00	-17.60	2 22	435462	25	48.00%	76.00%
822	GSSPFG00003650001	>scaffold_23013_23354	GSSPFG00003650001-RA_2485-3560	132.00	-18.52	2 22	132158	24	62.50%	75.00%
823	GSSPFG00003650001	>scaffold_23013_23354	GSSPFG00003650001-RA_2485-3560	121.00	-17.78	2 22	9841006	22	59.09%	77.27%
824	GSSPFG00003650001	>scaffold_23013_23354	GSSPFG00003650001-RA_2485-3560	102.00	-19.29	5 22	741763	18	77.78%	88.89%
825	GSSPFG00003650001	>scaffold_23013_23354	GSSPFG00003650001-RA_2485-3560	100.00	-21.31	3 22	260285	22	59.09%	77.27%
826	GSSPFG00014039001	>scaffold_23013_23354	GSSPFG00014039001.4-RB_35622-38295	147.00	-20.80	2 22	713734	20	60.00%	90.00%
827	GSSPFG00014039001	>scaffold_23013_23354	GSSPFG00014039001.4-RB_35622-38295	117.00	-20.76	2 22	148172	23	56.52%	78.26%
828	GSSPFG00014039001	>scaffold_23013_23354	GSSPFG00014039001.4-RB_35622-38295	114.00	-18.95	3 21	304328	20	55.00%	80.00%
829	GSSPFG00014039001	>scaffold_23013_23354	GSSPFG00014039001.4-RB_35622-38295	113.00	-18.08	2 22	600622	20	60.00%	70.00%
830	GSSPFG00014039001	>scaffold_23013_23354	GSSPFG00014039001.4-RB_35622-38295	111.00	-21.57	2 22	812837	23	56.52%	78.26%
831	GSSPFG00014039001	>scaffold_23013_23354	GSSPFG00014039001.4-RB_35622-38295	108.00	-17.34	2 19	271292	17	64.71%	76.47%
832	GSSPFG00014039001	>scaffold_23013_23354	GSSPFG00014039001.4-RB_35622-38295	96.00	-22.51	2 21	215237	19	63.16%	78.95%
833	GSSPFG00016795001	>scaffold_23013_23354	GSSPFG00016795001-RA_2866-3263	153.00	-19.36	2 22	196220	23	69.57%	78.26%
834	GSSPFG00030351001	>scaffold_23013_23354	GSSPFG00030351001-RA_204-983	111.00	-17.83	5 22	295316	17	76.47%	82.35%
835	GSSPFG00030351001	>scaffold_23013_23354	GSSPFG00030351001-RA_204-983	99.00	-21.24	2 22	668694	24	62.50%	79.17%
836	GSSPFG00007720001	>scaffold_23013_23354	GSSPFG00007720001-RA_1160-2183	128.00	-17.14	2 22	316340	22	50.00%	86.36%
837	GSSPFG00007720001	>scaffold_23013_23354	GSSPFG00007720001-RA_1160-2183	113.00	-22.00	4 22	900922	18	66.67%	77.78%
838	GSSPFG00029664001	>scaffold_23013_23354	GSSPFG00029664001-RA_5132-6288	92.00	-19.24	5 22	109132	18	66.67%	77.78%
839	GSSPFG00017310001	>scaffold_23013_23354	GSSPFG00017310001-RA_2505-3991	103.00	-17.76	2 21	349372	20	55.00%	85.00%
840	GSSPFG00017310001	>scaffold_23013_23354	GSSPFG00017310001-RA_2505-3991	95.00	-18.41	5 22	12761301	20	55.00%	80.00%
841	GSSPFG00018768001	>scaffold_23013_23354	GSSPFG00018768001-RA_949-1616	104.00	-19.12	2 22	286311	23	56.52%	65.22%
842	GSSPFG00018768001	>scaffold_23013_23354	GSSPFG00018768001-RA_949-1616	102.00	-19.16	2 22	553581	26	50.00%	76.92%
843	GSSPFG00028101001	>scaffold_23013_23354	GSSPFG00028101001-RA_1882-2689	102.00	-18.93	2 21	747769	20	70.00%	80.00%
844	GSSPFG00028101001	>scaffold_23013_23354	GSSPFG00028101001-RA_1882-2689	96.00	-22.43	4 22	456479	19	57.89%	84.21%
845	GSSPFG00033966001	>scaffold_23013_23354	GSSPFG00033966001-RA_3401-4239	108.00	-18.19	2 21	493515	19	57.89%	84.21%
846	GSSPFG00019089001	>scaffold_23013_23354	GSSPFG00019089001-RA_1139-2318	116.00	-20.55	3 22	889913	21	61.90%	80.95%
847	GSSPFG00019089001	>scaffold_23013_23354	GSSPFG00019089001-RA_1139-2318	115.00	-19.58	2 22	601626	23	52.17%	73.91%
848	GSSPFG00019089001	>scaffold_23013_23354	GSSPFG00019089001-RA_1139-2318	108.00	-20.47	4 22	188212	20	60.00%	80.00%
849	GSSPFG00028335001	>scaffold_23013_23354	GSSPFG00028335001-RA_3293-4147	120.00	-19.70	3 22	311335	21	66.67%	80.95%
850	GSSPFG00015836001	>scaffold_23013_23354	GSSPFG00015836001-RA_181-416	96.00	-19.82	2 19	176197	17	58.82%	82.35%
851	GSSPFG00015836001	>scaffold_23013_23354	GSSPFG00015836001-RA_181-416	90.00	-18.10	4 22	161182	19	68.42%	78.95%
852	GSSPFG00032228001	>scaffold_23013_23354	GSSPFG00032228001-RA_6426-6968	135.00	-20.81	2 22	179203	22	68.18%	81.82%
853	GSSPFG00033577001	>scaffold_23013_23354	GSSPFG00033577001-RA_6107-6526	128.00	-20.43	2 22	339364	23	56.52%	78.26%
854	GSSPFG00033577001	>scaffold_23013_23354	GSSPFG00033577001-RA_6107-6526	127.00	-17.31	2 22	170191	20	65.00%	75.00%
855	GSSPFG00033577001	>scaffold_23013_23354	GSSPFG00033577001-RA_6107-6526	107.00	-19.17	3 21	231254	19	68.42%	84.21%
856	GSSPFG00033577001	>scaffold_23013_23354	GSSPFG00033577001-RA_6107-6526	99.00	-17.53	4 21	299322	18	55.56%	77.78%
857	GSSPFG00026214001	>scaffold_23013_23354	GSSPFG00026214001-RA_43091-43661	129.00	-21.86	2 20	456477	18	61.11%	88.89%
858	GSSPFG00026214001	>scaffold_23013_23354	GSSPFG00026214001-RA_43091-43661	107.00	-21.69	2 22	392417	23	65.22%	78.26%
859	GSSPFG00026215001	>scaffold_23013_23354	GSSPFG00026215001-RA_65431-65937	95.00	-17.28	2 18	219241	17	58.82%	76.47%
860	GSSPFG00021644001	>scaffold_23013_23354	GSSPFG00021644001-RA_375-900	119.00	-22.43	2 21	320343	20	70.00%	75.00%
861	GSSPFG00021644001	>scaffold_23013_23354	GSSPFG00021644001-RA_375-900	113.00	-20.48	2 22	348370	20	55.00%	75.00%
862	GSSPFG00021644001	>scaffold_23013_23354	GSSPFG00021644001-RA_375-900	112.00	-22.72	2 13	81103	11	72.73%	100.00%
863	GSSPFG00021644001	>scaffold_23013_23354	GSSPFG00021644001-RA_375-900	112.00	-18.09	2 22	371390	20	70.00%	75.00%
864	GSSPFG00021644001	>scaffold_23013_23354	GSSPFG00021644001-RA_375-900	109.00	-20.84	2 21	440463	21	61.90%	76.19%
865	GSSPFG00021644001	>scaffold_23013_23354	GSSPFG00021644001-RA_375-900	107.00	-18.57	3 20	187210	18	72.22%	72.22%
866	GSSPFG00021644001	>scaffold_23013_23354	GSSPFG00021644001-RA_375-900	102.00	-17.21	5 21	14 38	18	66.67%	83.33%
867	GSSPFG00021644001	>scaffold_23013_23354	GSSPFG00021644001-RA_375-900	101.00	-21.58	2 21	260283	21	66.67%	76.19%
868	GSSPFG00021644001	>scaffold_23013_23354	GSSPFG00021644001-RA_375-900	93.00	-17.15	2 22	167190	21	61.90%	80.95%
869	GSSPFG00021644001	>scaffold_23013_23354	GSSPFG00021644001-RA_375-900	93.00	-17.15	2 22	287310	21	61.90%	80.95%
870	GSSPFG00027810001	>scaffold_23013_23354	GSSPFG00027810001-RA_18428-19067	94.00	-18.12	3 19	135158	17	52.94%	94.12%
871	GSSPFG00024365001	>scaffold_23013_23354	GSSPFG00024365001-RA_1674-2226	100.00	-19.07	5 22	195220	20	55.00%	80.00%
872	GSSPFG00024365001	>scaffold_23013_23354	GSSPFG00024365001-RA_1674-2226	99.00	-18.40	5 21	501525	18	66.67%	88.89%
873	GSSPFG00019255001	>scaffold_23013_23354	GSSPFG00019255001-RA_1049-2150	140.00	-25.04	3 13	64 86	10	100.00%	100.00%
874	GSSPFG00019255001	>scaffold_23013_23354	GSSPFG00019255001-RA_1049-2150	100.00	-17.28	2 7	468490	5	100.00%	100.00%
875	GSSPFG00002187001	>scaffold_23013_23354	GSSPFG00002187001-RA_1215-2378	105.00	-17.42	2 18	6 28	16	68.75%	81.25%
876	GSSPFG00002187001	>scaffold_23013_23354	GSSPFG00002187001-RA_1215-2378	97.00	-21.94	2 22	88110	20	45.00%	80.00%
877	GSSPFG00014043001	>scaffold_23013_23354	GSSPFG00014043001-RA_21156-22476	124.00	-23.86	2 22	729752	21	57.14%	76.19%
878	GSSPFG00014043001	>scaffold_23013_23354	GSSPFG00014043001-RA_21156-22476	95.00	-22.53	2 22	10781106	26	53.85%	73.08%
879	GSSPFG00033694001	>scaffold_23013_23354	GSSPFG00033694001-RA_1557-1815	101.00	-18.87	2 21	65 87	20	65.00%	80.00%
880	GSSPFG00010214001	>scaffold_23013_23354	GSSPFG00010214001-RA_3186-3740	127.00	-18.68	2 22	128155	25	68.00%	68.00%
881	GSSPFG00010215001	>scaffold_23013_23354	GSSPFG00010215001-RA_4873-5827	121.00	-22.00	2 22	41 63	20	75.00%	80.00%
882	GSSPFG00010215001	>scaffold_23013_23354	GSSPFG00010215001-RA_4873-5827	120.00	-17.99	2 8	427449	6	100.00%	100.00%
883	GSSPFG00010215001	>scaffold_23013_23354	GSSPFG00010215001-RA_4873-5827	101.00	-19.72	2 21	443464	20	60.00%	75.00%
884	GSSPFG00010215001	>scaffold_23013_23354	GSSPFG00010215001-RA_4873-5827	92.00	-17.82	2 17	53 75	15	53.33%	80.00%
885	GSSPFG00012190001	>scaffold_23013_23354	GSSPFG00012190001-RA_16037-17479	118.00	-18.85	2 22	11891209	20	45.00%	85.00%
886	GSSPFG00012190001	>scaffold_23013_23354	GSSPFG00012190001-RA_16037-17479	114.00	-20.60	2 22	11431163	20	55.00%	85.00%
887	GSSPFG00012190001	>scaffold_23013_23354	GSSPFG00012190001-RA_16037-17479	110.00	-20.02	2 22	57 77	20	55.00%	80.00%
888	GSSPFG00012190001	>scaffold_23013_23354	GSSPFG00012190001-RA_16037-17479	91.00	-17.23	3 22	13321356	21	57.14%	76.19%
889	GSSPFG00003067001	>scaffold_23013_23354	GSSPFG00003067001-RA_778-1769	108.00	-19.07	2 22	87110	21	61.90%	80.95%
890	GSSPFG00003067001	>scaffold_23013_23354	GSSPFG00003067001-RA_778-1769	102.00	-19.03	2 21	135156	19	57.89%	84.21%
891	GSSPFG00015413001	>scaffold_23013_23354	GSSPFG00015413001-RA_50382-51476	97.00	-19.09	3 19	9931016	17	64.71%	82.35%
892	GSSPFG00015825001	>scaffold_23013_23354	GSSPFG00015825001.2-RA_1728-2328	105.00	-18.30	4 22	164186	18	50.00%	83.33%
893	GSSPFG00015825001	>scaffold_23013_23354	GSSPFG00015825001.2-RA_1728-2328	97.00	-17.73	2 22	197220	21	47.62%	85.71%
894	GSSPFG00006882001	>scaffold_23013_23354	GSSPFG00006882001-RA_2616-4079	134.00	-19.27	2 21	288309	19	63.16%	89.47%
895	GSSPFG00034159001	>scaffold_23013_23354	GSSPFG00034159001.3-RA_3020-4108	115.00	-17.23	2 20	443465	18	55.56%	83.33%
896	GSSPFG00026864001	>scaffold_23013_23354	GSSPFG00026864001-RA_4102-4432	112.00	-19.22	2 21	205227	19	57.89%	73.68%
897	GSSPFG00001038001	>scaffold_23013_23354	GSSPFG00001038001-RA_9842-9959	119.00	-19.07	2 16	90112	14	57.14%	85.71%
898	GSSPFG00023554001	>scaffold_23013_23354	GSSPFG00023554001-RA_1682-2244	98.00	-18.57	2 21	421445	21	47.62%	76.19%
899	GSSPFG00023554001	>scaffold_23013_23354	GSSPFG00023554001-RA_1682-2244	93.00	-19.08	2 22	479502	21	57.14%	85.71%
900	GSSPFG00021125001	>scaffold_23013_23354	GSSPFG00021125001-RA_5453-5879	99.00	-20.73	2 22	7 28	20	50.00%	85.00%
901	GSSPFG00021125001	>scaffold_23013_23354	GSSPFG00021125001-RA_5453-5879	98.00	-17.17	2 21	134155	19	57.89%	78.95%
902	GSSPFG00024256001	>scaffold_23013_23354	GSSPFG00024256001-RA_35138-35470	92.00	-18.02	5 22	221246	20	50.00%	75.00%
903	GSSPFG00024260001	>scaffold_23013_23354	GSSPFG00024260001-RA_48537-49172	138.00	-18.01	2 19	513535	17	58.82%	82.35%
904	GSSPFG00024260001	>scaffold_23013_23354	GSSPFG00024260001-RA_48537-49172	134.00	-18.43	2 20	262286	20	70.00%	80.00%
905	GSSPFG00024260001	>scaffold_23013_23354	GSSPFG00024260001-RA_48537-49172	114.00	-20.35	2 21	604628	21	66.67%	76.19%
906	GSSPFG00024260001	>scaffold_23013_23354	GSSPFG00024260001-RA_48537-49172	109.00	-17.18	2 18	351373	16	56.25%	81.25%
907	GSSPFG00024260001	>scaffold_23013_23354	GSSPFG00024260001-RA_48537-49172	107.00	-17.75	4 17	329352	14	71.43%	92.86%
908	GSSPFG00034368001	>scaffold_23013_23354	GSSPFG00034368001-RA_1733-2233	107.00	-17.17	3 21	172198	22	63.64%	77.27%
909	GSSPFG00034368001	>scaffold_23013_23354	GSSPFG00034368001-RA_1733-2233	107.00	-18.11	3 22	274295	19	63.16%	73.68%
910	GSSPFG00018317001	>scaffold_23013_23354	GSSPFG00018317001-RA_3228-4573	129.00	-22.01	2 22	209230	21	61.90%	85.71%
911	GSSPFG00018317001	>scaffold_23013_23354	GSSPFG00018317001-RA_3228-4573	112.00	-22.22	2 22	368392	22	50.00%	81.82%
912	GSSPFG00020465001	>scaffold_23013_23354	GSSPFG00020465001-RA_4804-5241	97.00	-19.15	2 22	339361	20	50.00%	75.00%
913	GSSPFG00020815001	>scaffold_23013_23354	GSSPFG00020815001-RA_21962-22361	133.00	-17.87	2 20	7 28	18	61.11%	77.78%
914	GSSPFG00018660001	>scaffold_23013_23354	GSSPFG00018660001-RA_5895-6243	132.00	-22.14	2 22	278301	21	52.38%	90.48%
915	GSSPFG00018660001	>scaffold_23013_23354	GSSPFG00018660001-RA_5895-6243	95.00	-17.19	2 20	34 56	18	44.44%	83.33%
916	GSSPFG00034292001	>scaffold_23013_23354	GSSPFG00034292001-RA_16536-17180	137.00	-22.02	2 18	96118	16	68.75%	93.75%
917	GSSPFG00034293001	>scaffold_23013_23354	GSSPFG00034293001-RA_23035-23677	133.00	-21.25	2 18	96118	16	62.50%	93.75%
918	GSSPFG00012677001	>scaffold_23013_23354	GSSPFG00012677001-RA_2445-3467	144.00	-18.80	2 18	6 29	17	76.47%	82.35%
919	GSSPFG00012677001	>scaffold_23013_23354	GSSPFG00012677001-RA_2445-3467	124.00	-31.00	2 21	464486	19	73.68%	89.47%
920	GSSPFG00012677001	>scaffold_23013_23354	GSSPFG00012677001-RA_2445-3467	122.00	-19.47	2 21	166193	24	62.50%	70.83%
921	GSSPFG00012677001	>scaffold_23013_23354	GSSPFG00012677001-RA_2445-3467	93.00	-17.24	2 22	504527	21	66.67%	76.19%
922	GSSPFG00012677001	>scaffold_23013_23354	GSSPFG00012677001-RA_2445-3467	93.00	-18.02	2 19	814839	20	50.00%	65.00%
923	GSSPFG00021557001	>scaffold_23013_23354	GSSPFG00021557001-RA_8360-9641	150.00	-25.43	2 21	585612	24	58.33%	79.17%
924	GSSPFG00021557001	>scaffold_23013_23354	GSSPFG00021557001-RA_8360-9641	110.00	-17.28	3 20	758781	18	55.56%	88.89%
925	GSSPFG00021557001	>scaffold_23013_23354	GSSPFG00021557001-RA_8360-9641	105.00	-19.76	2 21	134154	19	68.42%	78.95%
926	GSSPFG00021557001	>scaffold_23013_23354	GSSPFG00021557001-RA_8360-9641	103.00	-21.16	2 22	25 46	20	65.00%	75.00%
927	GSSPFG00000866001	>scaffold_23013_23354	GSSPFG00000866001-RA_3759-3999	119.00	-17.69	2 22	199220	20	60.00%	85.00%
928	GSSPFG00000866001	>scaffold_23013_23354	GSSPFG00000866001-RA_3759-3999	108.00	-20.21	2 19	80104	19	63.16%	78.95%
929	GSSPFG00000866001	>scaffold_23013_23354	GSSPFG00000866001-RA_3759-3999	96.00	-17.56	2 22	65 90	23	56.52%	69.57%
930	GSSPFG00020411001	>scaffold_23013_23354	GSSPFG00020411001-RA_4805-5345	111.00	-17.95	3 22	39 60	19	68.42%	73.68%
931	GSSPFG00010240001	>scaffold_23013_23354	GSSPFG00010240001.3-RA_4092-5629	159.00	-24.05	2 21	11521175	20	60.00%	90.00%
932	GSSPFG00010240001	>scaffold_23013_23354	GSSPFG00010240001.3-RA_4092-5629	111.00	-18.13	2 22	213237	22	54.55%	81.82%
933	GSSPFG00010240001	>scaffold_23013_23354	GSSPFG00010240001.3-RA_4092-5629	100.00	-17.07	2 7	296318	5	100.00%	100.00%
934	GSSPFG00025674001	>scaffold_23013_23354	GSSPFG00025674001-RA_955-2539	132.00	-17.16	2 21	741763	19	57.89%	68.42%
935	GSSPFG00025674001	>scaffold_23013_23354	GSSPFG00025674001-RA_955-2539	117.00	-21.25	3 22	10551078	20	75.00%	75.00%
936	GSSPFG00025674001	>scaffold_23013_23354	GSSPFG00025674001-RA_955-2539	109.00	-19.90	2 22	12781300	20	50.00%	75.00%
937	GSSPFG00025674001	>scaffold_23013_23354	GSSPFG00025674001-RA_955-2539	101.00	-17.25	2 22	207228	21	61.90%	76.19%
938	GSSPFG00025674001	>scaffold_23013_23354	GSSPFG00025674001-RA_955-2539	99.00	-20.37	2 17	1 22	17	70.59%	88.24%
939	GSSPFG00025674001	>scaffold_23013_23354	GSSPFG00025674001-RA_955-2539	98.00	-24.15	2 22	14101430	20	50.00%	85.00%
940	GSSPFG00011689001	>scaffold_23013_23354	GSSPFG00011689001-RA_31913-33304	127.00	-20.42	2 17	12911314	16	68.75%	87.50%
941	GSSPFG00011689001	>scaffold_23013_23354	GSSPFG00011689001-RA_31913-33304	117.00	-17.04	2 20	368389	18	55.56%	77.78%
942	GSSPFG00019099001	>scaffold_23013_23354	GSSPFG00019099001-RA_40007-40413	98.00	-17.70	2 22	277297	20	60.00%	75.00%
943	GSSPFG00012658001	>scaffold_23013_23354	GSSPFG00012658001-RA_2128-2595	91.00	-18.81	2 22	27 53	24	62.50%	70.83%
944	GSSPFG00022840001	>scaffold_23013_23354	GSSPFG00022840001-RA_3468-4498	115.00	-18.97	3 21	533557	20	65.00%	80.00%
945	GSSPFG00022840001	>scaffold_23013_23354	GSSPFG00022840001-RA_3468-4498	115.00	-20.47	3 22	855879	21	61.90%	85.71%
946	GSSPFG00022840001	>scaffold_23013_23354	GSSPFG00022840001-RA_3468-4498	95.00	-18.09	4 22	381407	22	54.55%	72.73%
947	GSSPFG00018520001	>scaffold_23013_23354	GSSPFG00018520001-RA_2087-2986	101.00	-23.82	2 22	86108	20	60.00%	85.00%
948	GSSPFG00018520001	>scaffold_23013_23354	GSSPFG00018520001-RA_2087-2986	98.00	-18.68	2 20	240264	20	65.00%	70.00%
949	GSSPFG00018520001	>scaffold_23013_23354	GSSPFG00018520001-RA_2087-2986	97.00	-18.20	5 21	258285	21	66.67%	76.19%
950	GSSPFG00018520001	>scaffold_23013_23354	GSSPFG00018520001-RA_2087-2986	93.00	-19.07	3 18	195217	15	60.00%	80.00%
951	GSSPFG00019087001	>scaffold_23013_23354	GSSPFG00019087001-RA_935-1976	129.00	-20.91	2 22	27 49	20	55.00%	80.00%
952	GSSPFG00011333001	>scaffold_23013_23354	GSSPFG00011333001-RA_17625-17899	154.00	-23.15	2 21	122143	19	73.68%	89.47%
953	GSSPFG00011334001	>scaffold_23013_23354	GSSPFG00011334001-RA_32366-33067	121.00	-17.37	2 22	106128	20	45.00%	80.00%
954	GSSPFG00011334001	>scaffold_23013_23354	GSSPFG00011334001-RA_32366-33067	102.00	-17.23	2 21	122151	26	50.00%	73.08%
955	GSSPFG00017576001	>scaffold_23013_23354	GSSPFG00017576001-RA_2377-3406	124.00	-17.23	3 22	140163	20	55.00%	85.00%
956	GSSPFG00020377001	>scaffold_23013_23354	GSSPFG00020377001-RA_4249-5538	114.00	-18.87	3 19	243265	16	62.50%	87.50%
957	GSSPFG00020377001	>scaffold_23013_23354	GSSPFG00020377001-RA_4249-5538	110.00	-23.65	2 21	10451066	19	68.42%	84.21%
958	GSSPFG00020377001	>scaffold_23013_23354	GSSPFG00020377001-RA_4249-5538	99.00	-18.88	2 22	866887	20	60.00%	75.00%
959	GSSPFG00020377001	>scaffold_23013_23354	GSSPFG00020377001-RA_4249-5538	90.00	-17.77	2 21	324351	24	54.17%	70.83%
960	GSSPFG00022512001	>scaffold_23013_23354	GSSPFG00022512001-RA_5241-6810	121.00	-19.46	2 22	10341056	20	55.00%	70.00%
961	GSSPFG00022512001	>scaffold_23013_23354	GSSPFG00022512001-RA_5241-6810	100.00	-29.91	2 22	16 36	21	71.43%	80.95%
962	GSSPFG00022512001	>scaffold_23013_23354	GSSPFG00022512001-RA_5241-6810	99.00	-24.03	2 22	13921419	25	64.00%	76.00%
963	GSSPFG00022512001	>scaffold_23013_23354	GSSPFG00022512001-RA_5241-6810	94.00	-17.39	5 20	67 86	15	73.33%	80.00%
964	GSSPFG00002397001	>scaffold_23013_23354	GSSPFG00002397001-RA_4437-4878	110.00	-18.48	2 21	175196	19	63.16%	73.68%
965	GSSPFG00018380001	>scaffold_23013_23354	GSSPFG00018380001-RA_2168-6442	100.00	-19.78	2 22	639664	23	52.17%	78.26%
966	GSSPFG00018380001	>scaffold_23013_23354	GSSPFG00018380001-RA_2168-6442	94.00	-18.47	5 20	106129	16	68.75%	87.50%
967	GSSPFG00010157001	>scaffold_23013_23354	GSSPFG00010157001.3-RA_3139-3295	107.00	-17.26	2 21	1 22	20	55.00%	90.00%
968	GSSPFG00021827001	>scaffold_23013_23354	GSSPFG00021827001-RA_1999-3440	140.00	-19.07	2 22	12051228	21	61.90%	76.19%
969	GSSPFG00021827001	>scaffold_23013_23354	GSSPFG00021827001-RA_1999-3440	129.00	-22.74	2 22	684706	20	65.00%	85.00%
970	GSSPFG00021827001	>scaffold_23013_23354	GSSPFG00021827001-RA_1999-3440	119.00	-18.40	3 20	429451	17	64.71%	88.24%
971	GSSPFG00021827001	>scaffold_23013_23354	GSSPFG00021827001-RA_1999-3440	118.00	-20.44	3 22	11351157	20	70.00%	85.00%
972	GSSPFG00021827001	>scaffold_23013_23354	GSSPFG00021827001-RA_1999-3440	110.00	-23.81	2 22	13611381	20	60.00%	75.00%
973	GSSPFG00021827001	>scaffold_23013_23354	GSSPFG00021827001-RA_1999-3440	101.00	-22.35	3 22	310332	19	47.37%	89.47%
974	GSSPFG00021124001	>scaffold_23013_23354	GSSPFG00021124001-RA_847-1142	120.00	-19.28	2 20	49 75	22	59.09%	81.82%
975	GSSPFG00016586001	>scaffold_23013_23354	GSSPFG00016586001-RA_2498-3253	155.00	-28.26	2 22	28 49	20	70.00%	90.00%
976	GSSPFG00016586001	>scaffold_23013_23354	GSSPFG00016586001-RA_2498-3253	110.00	-18.12	2 22	253279	24	62.50%	75.00%
977	GSSPFG00016586001	>scaffold_23013_23354	GSSPFG00016586001-RA_2498-3253	108.00	-22.34	2 20	282303	19	68.42%	78.95%
978	GSSPFG00016586001	>scaffold_23013_23354	GSSPFG00016586001-RA_2498-3253	103.00	-18.98	2 22	452477	23	65.22%	73.91%
979	GSSPFG00010710001	>scaffold_23013_23354	GSSPFG00010710001-RA_4895-5335	106.00	-18.74	2 19	35 57	17	58.82%	88.24%
980	GSSPFG00010710001	>scaffold_23013_23354	GSSPFG00010710001-RA_4895-5335	100.00	-17.14	2 22	323347	22	36.36%	81.82%
981	GSSPFG00029276001	>scaffold_23013_23354	GSSPFG00029276001.3-RA_6842-7175	93.00	-17.43	2 21	171191	19	52.63%	78.95%
982	GSSPFG00029278001	>scaffold_23013_23354	GSSPFG00029278001.3-RA_14721-15890	160.00	-25.20	2 20	509529	18	77.78%	83.33%
983	GSSPFG00029278001	>scaffold_23013_23354	GSSPFG00029278001.3-RA_14721-15890	128.00	-19.15	2 22	846869	21	61.90%	76.19%
984	GSSPFG00029278001	>scaffold_23013_23354	GSSPFG00029278001.3-RA_14721-15890	112.00	-23.72	2 22	611635	22	63.64%	77.27%
985	GSSPFG00029278001	>scaffold_23013_23354	GSSPFG00029278001.3-RA_14721-15890	112.00	-23.72	2 22	639663	22	63.64%	77.27%
986	GSSPFG00029278001	>scaffold_23013_23354	GSSPFG00029278001.3-RA_14721-15890	104.00	-20.27	2 20	282302	18	61.11%	72.22%
987	GSSPFG00029278001	>scaffold_23013_23354	GSSPFG00029278001.3-RA_14721-15890	100.00	-18.91	2 22	219244	23	52.17%	73.91%
988	GSSPFG00029284001	>scaffold_23013_23354	GSSPFG00029284001-RA_136371-137413	112.00	-18.42	5 21	26 48	16	75.00%	81.25%
989	GSSPFG00029284001	>scaffold_23013_23354	GSSPFG00029284001-RA_136371-137413	99.00	-17.76	2 21	338361	20	60.00%	75.00%
990	GSSPFG00029284001	>scaffold_23013_23354	GSSPFG00029284001-RA_136371-137413	90.00	-24.25	2 20	560584	20	65.00%	70.00%
991	GSSPFG00029284001	>scaffold_23013_23354	GSSPFG00029284001-RA_136371-137413	90.00	-18.74	2 21	864889	22	54.55%	72.73%
992	GSSPFG00008496001	>scaffold_23013_23354	GSSPFG00008496001-RA_4425-6428	136.00	-18.40	2 22	684707	21	52.38%	80.95%
993	GSSPFG00008496001	>scaffold_23013_23354	GSSPFG00008496001-RA_4425-6428	135.00	-20.12	2 18	538562	18	66.67%	83.33%
994	GSSPFG00008496001	>scaffold_23013_23354	GSSPFG00008496001-RA_4425-6428	113.00	-25.06	3 22	857879	19	68.42%	84.21%
995	GSSPFG00008503001	>scaffold_23013_23354	GSSPFG00008503001-RA_37277-38570	147.00	-21.31	2 16	11401162	14	78.57%	92.86%
996	GSSPFG00008503001	>scaffold_23013_23354	GSSPFG00008503001-RA_37277-38570	103.00	-18.19	2 21	12581281	20	65.00%	75.00%
997	GSSPFG00015260001	>scaffold_23013_23354	GSSPFG00015260001-RA_378-921	112.00	-20.18	3 22	445469	21	61.90%	76.19%
998	GSSPFG00007381001	>scaffold_23013_23354	GSSPFG00007381001-RA_1795-2495	122.00	-18.22	2 21	378399	19	63.16%	73.68%
999	GSSPFG00007381001	>scaffold_23013_23354	GSSPFG00007381001-RA_1795-2495	101.00	-18.64	2 14	19 41	12	50.00%	91.67%
1000	GSSPFG00007381001	>scaffold_23013_23354	GSSPFG00007381001-RA_1795-2495	100.00	-19.40	2 22	288311	21	42.86%	76.19%
1001	GSSPFG00025710001	>scaffold_23013_23354	GSSPFG00025710001-RA_209695-210372	107.00	-17.91	3 22	128149	19	63.16%	73.68%
1002	GSSPFG00028289001	>scaffold_23013_23354	GSSPFG00028289001-RA_207-714	99.00	-21.13	2 21	483507	21	57.14%	85.71%
1003	GSSPFG00031002001	>scaffold_23013_23354	GSSPFG00031002001.3-RA_67515-67832	128.00	-17.48	2 17	97119	15	73.33%	80.00%
1004	GSSPFG00030660001	>scaffold_23013_23354	GSSPFG00030660001-RA_1692-2878	100.00	-17.23	2 22	75 99	22	59.09%	72.73%
1005	GSSPFG00003738001	>scaffold_23013_23354	GSSPFG00003738001-RA_1545-2887	112.00	-17.35	2 21	439459	19	68.42%	78.95%
1006	GSSPFG00003738001	>scaffold_23013_23354	GSSPFG00003738001-RA_1545-2887	108.00	-17.74	2 22	765789	22	45.45%	81.82%
1007	GSSPFG00003738001	>scaffold_23013_23354	GSSPFG00003738001-RA_1545-2887	106.00	-18.74	2 22	696718	21	52.38%	80.95%
1008	GSSPFG00003738001	>scaffold_23013_23354	GSSPFG00003738001-RA_1545-2887	97.00	-20.99	2 22	390412	20	50.00%	75.00%
1009	GSSPFG00012048001	>scaffold_23013_23354	GSSPFG00012048001-RA_59754-60539	127.00	-18.19	3 17	517540	15	73.33%	93.33%
1010	GSSPFG00001338001	>scaffold_23013_23354	GSSPFG00001338001-RA_61697-65897	113.00	-18.77	2 22	19812002	21	61.90%	80.95%
1011	GSSPFG00003037001	>scaffold_23013_23354	GSSPFG00003037001-RA_1113-2035	104.00	-17.66	2 21	72 94	19	52.63%	84.21%
1012	GSSPFG00026667001	>scaffold_23013_23354	GSSPFG00026667001-RA_3945-4354	135.00	-21.87	2 21	1 27	23	52.17%	78.26%
1013	GSSPFG00012369001	>scaffold_23013_23354	GSSPFG00012369001-RA_1287-2513	112.00	-17.40	2 21	392414	19	57.89%	89.47%
1014	GSSPFG00012369001	>scaffold_23013_23354	GSSPFG00012369001-RA_1287-2513	108.00	-17.39	2 20	517542	21	66.67%	76.19%
1015	GSSPFG00012369001	>scaffold_23013_23354	GSSPFG00012369001-RA_1287-2513	103.00	-20.81	2 21	900924	21	57.14%	66.67%
1016	GSSPFG00012369001	>scaffold_23013_23354	GSSPFG00012369001-RA_1287-2513	95.00	-18.64	2 22	361388	25	52.00%	76.00%
1017	GSSPFG00012369001	>scaffold_23013_23354	GSSPFG00012369001-RA_1287-2513	94.00	-19.07	2 20	487511	20	65.00%	75.00%
1018	GSSPFG00003193001	>scaffold_23013_23354	GSSPFG00003193001-RA_4477-5143	123.00	-22.57	2 22	102128	24	62.50%	70.83%
1019	GSSPFG00003193001	>scaffold_23013_23354	GSSPFG00003193001-RA_4477-5143	113.00	-18.51	2 22	191210	20	55.00%	85.00%
1020	GSSPFG00003193001	>scaffold_23013_23354	GSSPFG00003193001-RA_4477-5143	102.00	-18.27	5 20	8 32	17	70.59%	76.47%
1021	GSSPFG00010150001	>scaffold_23013_23354	GSSPFG00010150001-RA_57949-58475	117.00	-18.47	2 20	318342	20	60.00%	90.00%
1022	GSSPFG00004276001	>scaffold_23013_23354	GSSPFG00004276001-RA_2936-3898	109.00	-18.22	2 22	630653	21	57.14%	76.19%
1023	GSSPFG00018004001	>scaffold_23013_23354	GSSPFG00018004001-RA_1259-2764	159.00	-23.32	2 21	207231	21	66.67%	80.95%
1024	GSSPFG00018004001	>scaffold_23013_23354	GSSPFG00018004001-RA_1259-2764	113.00	-19.98	2 18	14001423	17	64.71%	70.59%
1025	GSSPFG00008822001	>scaffold_23013_23354	GSSPFG00008822001-RA_40423-40996	148.00	-17.62	2 16	418438	14	78.57%	85.71%
1026	GSSPFG00008822001	>scaffold_23013_23354	GSSPFG00008822001-RA_40423-40996	143.00	-20.49	2 21	126149	20	60.00%	85.00%
1027	GSSPFG00008823001	>scaffold_23013_23354	GSSPFG00008823001-RA_50425-51299	106.00	-18.74	2 20	636659	19	52.63%	78.95%
1028	GSSPFG00008823001	>scaffold_23013_23354	GSSPFG00008823001-RA_50425-51299	98.00	-19.66	2 21	255277	20	60.00%	85.00%
1029	GSSPFG00008823001	>scaffold_23013_23354	GSSPFG00008823001-RA_50425-51299	95.00	-17.69	2 22	804829	23	56.52%	73.91%
1030	GSSPFG00008823001	>scaffold_23013_23354	GSSPFG00008823001-RA_50425-51299	92.00	-19.81	2 22	125152	25	48.00%	72.00%
1031	GSSPFG00008823001	>scaffold_23013_23354	GSSPFG00008823001-RA_50425-51299	91.00	-17.74	2 22	755781	24	54.17%	70.83%
1032	GSSPFG00014644001	>scaffold_23013_23354	GSSPFG00014644001-RA_118772-118979	100.00	-18.93	2 17	90114	17	58.82%	76.47%
1033	GSSPFG00005015001	>scaffold_23013_23354	GSSPFG00005015001-RA_5423-6423	130.00	-19.91	3 19	436458	16	68.75%	87.50%
1034	GSSPFG00005015001	>scaffold_23013_23354	GSSPFG00005015001-RA_5423-6423	106.00	-21.06	2 21	628656	25	60.00%	68.00%
1035	GSSPFG00005015001	>scaffold_23013_23354	GSSPFG00005015001-RA_5423-6423	101.00	-17.76	5 22	528550	17	64.71%	88.24%
1036	GSSPFG00005016001	>scaffold_23013_23354	GSSPFG00005016001-RA_15227-16354	163.00	-29.18	2 19	81103	18	83.33%	88.89%
1037	GSSPFG00005016001	>scaffold_23013_23354	GSSPFG00005016001-RA_15227-16354	149.00	-25.18	2 21	39 61	20	65.00%	80.00%
1038	GSSPFG00005016001	>scaffold_23013_23354	GSSPFG00005016001-RA_15227-16354	139.00	-24.55	2 22	109127	20	70.00%	80.00%
1039	GSSPFG00005016001	>scaffold_23013_23354	GSSPFG00005016001-RA_15227-16354	114.00	-21.59	2 21	64 85	19	63.16%	63.16%
1040	GSSPFG00005016001	>scaffold_23013_23354	GSSPFG00005016001-RA_15227-16354	100.00	-17.31	3 8	156178	5	100.00%	100.00%
1041	GSSPFG00005020001	>scaffold_23013_23354	GSSPFG00005020001-RA_27403-27651	124.00	-18.84	3 22	130154	21	57.14%	80.95%
1042	GSSPFG00020004001	>scaffold_23013_23354	GSSPFG00020004001-RA_2678-3310	100.00	-21.15	3 18	337361	17	76.47%	88.24%
1043	GSSPFG00032684001	>scaffold_23013_23354	GSSPFG00032684001.3-RA_850-2675	120.00	-19.38	2 21	11741195	20	70.00%	70.00%
1044	GSSPFG00032684001	>scaffold_23013_23354	GSSPFG00032684001.3-RA_850-2675	116.00	-19.90	2 22	461485	22	54.55%	68.18%
1045	GSSPFG00032684001	>scaffold_23013_23354	GSSPFG00032684001.3-RA_850-2675	106.00	-20.21	2 19	829851	17	47.06%	82.35%
1046	GSSPFG00032684001	>scaffold_23013_23354	GSSPFG00032684001.3-RA_850-2675	105.00	-19.79	2 16	11321153	14	64.29%	85.71%
1047	GSSPFG00032684001	>scaffold_23013_23354	GSSPFG00032684001.3-RA_850-2675	104.00	-19.04	2 8	687709	6	83.33%	100.00%
1048	GSSPFG00032684001	>scaffold_23013_23354	GSSPFG00032684001.3-RA_850-2675	104.00	-22.88	2 22	766790	22	54.55%	77.27%
1049	GSSPFG00032684001	>scaffold_23013_23354	GSSPFG00032684001.3-RA_850-2675	103.00	-21.37	5 21	928951	17	70.59%	76.47%
1050	GSSPFG00032684001	>scaffold_23013_23354	GSSPFG00032684001.3-RA_850-2675	91.00	-18.05	2 21	892916	21	52.38%	71.43%
1051	GSSPFG00020517001	>scaffold_23013_23354	GSSPFG00020517001-RA_877-1216	120.00	-18.53	2 22	176199	21	52.38%	76.19%
1052	GSSPFG00017791001	>scaffold_23013_23354	GSSPFG00017791001-RA_4172-5355	119.00	-17.85	4 22	419443	20	75.00%	85.00%
1053	GSSPFG00017791001	>scaffold_23013_23354	GSSPFG00017791001-RA_4172-5355	96.00	-18.61	3 22	218243	22	59.09%	81.82%
1054	GSSPFG00012769001	>scaffold_23013_23354	GSSPFG00012769001-RA_393-1587	131.00	-20.08	2 22	317341	22	63.64%	81.82%
1055	GSSPFG00012769001	>scaffold_23013_23354	GSSPFG00012769001-RA_393-1587	128.00	-24.98	3 22	255278	20	65.00%	80.00%
1056	GSSPFG00012769001	>scaffold_23013_23354	GSSPFG00012769001-RA_393-1587	128.00	-17.48	2 17	10521074	15	73.33%	80.00%
1057	GSSPFG00012769001	>scaffold_23013_23354	GSSPFG00012769001-RA_393-1587	117.00	-17.50	2 22	234256	20	60.00%	75.00%
1058	GSSPFG00021045001	>scaffold_23013_23354	GSSPFG00021045001-RA_68802-68974	108.00	-17.19	2 22	83107	22	50.00%	77.27%
1059	GSSPFG00012770001	>scaffold_23013_23354	GSSPFG00012770001-RA_1793-1999	108.00	-18.61	2 19	58 82	19	63.16%	78.95%
1060	GSSPFG00012770001	>scaffold_23013_23354	GSSPFG00012770001-RA_1793-1999	90.00	-17.71	2 21	159180	19	63.16%	63.16%
1061	GSSPFG00024954001	>scaffold_23013_23354	GSSPFG00024954001-RA_1688-1902	96.00	-18.59	3 18	60 84	17	64.71%	82.35%
1062	GSSPFG00001227001	>scaffold_23013_23354	GSSPFG00001227001-RA_3822-5263	135.00	-18.02	2 20	81103	18	61.11%	88.89%
1063	GSSPFG00001227001	>scaffold_23013_23354	GSSPFG00001227001-RA_3822-5263	114.00	-19.95	2 22	13831405	22	63.64%	77.27%
1064	GSSPFG00000132001	>scaffold_23013_23354	GSSPFG00000132001-RA_82860-84114	116.00	-20.62	3 21	934956	18	61.11%	83.33%
1065	GSSPFG00000132001	>scaffold_23013_23354	GSSPFG00000132001-RA_82860-84114	109.00	-17.35	2 16	544565	14	64.29%	92.86%
1066	GSSPFG00011945001	>scaffold_23013_23354	GSSPFG00011945001-RA_4249-5057	114.00	-18.46	4 22	117140	20	70.00%	85.00%
1067	GSSPFG00011945001	>scaffold_23013_23354	GSSPFG00011945001-RA_4249-5057	91.00	-18.57	6 22	582603	16	68.75%	87.50%
1068	GSSPFG00003915001	>scaffold_23013_23354	GSSPFG00003915001-RA_4938-6243	139.00	-27.11	2 22	353375	21	76.19%	85.71%
1069	GSSPFG00003915001	>scaffold_23013_23354	GSSPFG00003915001-RA_4938-6243	116.00	-18.23	2 21	5 24	19	63.16%	68.42%
1070	GSSPFG00003915001	>scaffold_23013_23354	GSSPFG00003915001-RA_4938-6243	113.00	-18.61	2 20	861882	18	61.11%	83.33%
1071	GSSPFG00021042001	>scaffold_23013_23354	GSSPFG00021042001.3-RA_8311-9584	139.00	-20.39	2 22	382403	20	60.00%	80.00%
1072	GSSPFG00021042001	>scaffold_23013_23354	GSSPFG00021042001.3-RA_8311-9584	121.00	-19.14	3 19	27 50	17	58.82%	88.24%
1073	GSSPFG00021042001	>scaffold_23013_23354	GSSPFG00021042001.3-RA_8311-9584	104.00	-17.62	2 22	662682	21	57.14%	76.19%
1074	GSSPFG00021042001	>scaffold_23013_23354	GSSPFG00021042001.3-RA_8311-9584	100.00	-17.60	4 19	848869	15	60.00%	86.67%
1075	GSSPFG00015295001	>scaffold_23013_23354	GSSPFG00015295001-RA_39830-40971	95.00	-19.11	4 22	918939	18	72.22%	88.89%
1076	GSSPFG00015296001	>scaffold_23013_23354	GSSPFG00015296001-RA_41036-42458	116.00	-19.12	2 18	811834	17	64.71%	88.24%
1077	GSSPFG00015296001	>scaffold_23013_23354	GSSPFG00015296001-RA_41036-42458	115.00	-19.23	2 17	552576	17	52.94%	82.35%
1078	GSSPFG00015296001	>scaffold_23013_23354	GSSPFG00015296001-RA_41036-42458	105.00	-18.00	2 22	369388	20	50.00%	80.00%
1079	GSSPFG00015296001	>scaffold_23013_23354	GSSPFG00015296001-RA_41036-42458	98.00	-17.90	2 22	718739	21	57.14%	85.71%
1080	GSSPFG00006810001	>scaffold_23013_23354	GSSPFG00006810001-RA_1697-2809	122.00	-21.30	3 21	10561077	18	55.56%	88.89%
1081	GSSPFG00006810001	>scaffold_23013_23354	GSSPFG00006810001-RA_1697-2809	98.00	-17.77	3 20	964987	18	66.67%	77.78%
1082	GSSPFG00006810001	>scaffold_23013_23354	GSSPFG00006810001-RA_1697-2809	96.00	-20.81	4 22	506530	20	55.00%	85.00%
1083	GSSPFG00003551001	>scaffold_23013_23354	GSSPFG00003551001-RA_1914-2044	162.00	-22.97	2 22	76 98	21	71.43%	85.71%
1084	GSSPFG00021605001	>scaffold_23013_23354	GSSPFG00021605001-RA_1295-2837	143.00	-22.00	3 22	11881215	24	70.83%	75.00%
1085	GSSPFG00021605001	>scaffold_23013_23354	GSSPFG00021605001-RA_1295-2837	108.00	-18.64	5 21	14791501	16	81.25%	87.50%
1086	GSSPFG00021605001	>scaffold_23013_23354	GSSPFG00021605001-RA_1295-2837	98.00	-17.13	2 16	729755	18	61.11%	77.78%
1087	GSSPFG00021605001	>scaffold_23013_23354	GSSPFG00021605001-RA_1295-2837	95.00	-18.52	2 22	569590	20	50.00%	80.00%
1088	GSSPFG00008589001	>scaffold_23013_23354	GSSPFG00008589001-RA_28080-28960	104.00	-17.20	3 22	480506	23	56.52%	78.26%
1089	GSSPFG00008590001	>scaffold_23013_23354	GSSPFG00008590001-RA_32175-32723	98.00	-21.48	3 22	81101	19	57.89%	84.21%
1090	GSSPFG00008596001	>scaffold_23013_23354	GSSPFG00008596001-RA_63620-65052	143.00	-26.57	2 22	347368	20	70.00%	90.00%
1091	GSSPFG00008596001	>scaffold_23013_23354	GSSPFG00008596001-RA_63620-65052	104.00	-21.35	2 8	583605	6	83.33%	100.00%
1092	GSSPFG00008598001	>scaffold_23013_23354	GSSPFG00008598001-RA_67850-69017	140.00	-17.80	2 22	898921	21	66.67%	85.71%
1093	GSSPFG00008598001	>scaffold_23013_23354	GSSPFG00008598001-RA_67850-69017	118.00	-21.29	2 21	304325	19	63.16%	84.21%
1094	GSSPFG00008598001	>scaffold_23013_23354	GSSPFG00008598001-RA_67850-69017	100.00	-18.04	2 22	637660	21	66.67%	80.95%
1095	GSSPFG00008598001	>scaffold_23013_23354	GSSPFG00008598001-RA_67850-69017	90.00	-18.97	2 20	11431167	20	55.00%	70.00%
1096	GSSPFG00008344001	>scaffold_23013_23354	GSSPFG00008344001-RA_2459-3874	123.00	-22.73	2 19	11841206	18	61.11%	88.89%
1097	GSSPFG00008344001	>scaffold_23013_23354	GSSPFG00008344001-RA_2459-3874	117.00	-17.72	3 21	500525	21	61.90%	80.95%
1098	GSSPFG00008344001	>scaffold_23013_23354	GSSPFG00008344001-RA_2459-3874	91.00	-17.71	2 21	12591284	22	50.00%	72.73%
1099	GSSPFG00008344001	>scaffold_23013_23354	GSSPFG00008344001-RA_2459-3874	90.00	-18.27	2 21	13721396	21	57.14%	71.43%
1100	GSSPFG00032373001	>scaffold_23013_23354	GSSPFG00032373001-RA_3968-4957	124.00	-20.81	2 20	705725	18	66.67%	77.78%
1101	GSSPFG00032373001	>scaffold_23013_23354	GSSPFG00032373001-RA_3968-4957	113.00	-21.52	2 22	664685	21	71.43%	80.95%
1102	GSSPFG00032373001	>scaffold_23013_23354	GSSPFG00032373001-RA_3968-4957	105.00	-17.72	3 22	886908	19	57.89%	84.21%
1103	GSSPFG00032373001	>scaffold_23013_23354	GSSPFG00032373001-RA_3968-4957	104.00	-18.24	2 22	635659	22	63.64%	72.73%
1104	GSSPFG00008097001	>scaffold_23013_23354	GSSPFG00008097001.2-RA_10534-11157	140.00	-27.58	3 22	82106	21	71.43%	85.71%
1105	GSSPFG00008097001	>scaffold_23013_23354	GSSPFG00008097001.2-RA_10534-11157	102.00	-21.85	2 20	535559	20	60.00%	80.00%
1106	GSSPFG00008096001	>scaffold_23013_23354	GSSPFG00008096001-RA_10792-11250	121.00	-18.32	2 20	333359	22	63.64%	72.73%
1107	GSSPFG00008096001	>scaffold_23013_23354	GSSPFG00008096001-RA_10792-11250	105.00	-18.89	5 22	153173	17	70.59%	88.24%
1108	GSSPFG00008096001	>scaffold_23013_23354	GSSPFG00008096001-RA_10792-11250	98.00	-18.40	2 21	218240	20	60.00%	85.00%
1109	GSSPFG00008106001	>scaffold_23013_23354	GSSPFG00008106001-RA_55500-55747	132.00	-20.47	2 22	134157	21	61.90%	80.95%
1110	GSSPFG00008106001	>scaffold_23013_23354	GSSPFG00008106001-RA_55500-55747	109.00	-21.62	2 20	119140	18	72.22%	83.33%
1111	GSSPFG00006598001	>scaffold_23013_23354	GSSPFG00006598001-RA_6019-6272	149.00	-23.08	2 19	53 76	18	66.67%	77.78%
1112	GSSPFG00006598001	>scaffold_23013_23354	GSSPFG00006598001-RA_6019-6272	96.00	-18.56	2 22	40 63	21	57.14%	71.43%
1113	GSSPFG00003779001	>scaffold_23013_23354	GSSPFG00003779001.5-RA_36169-36324	99.00	-19.48	3 22	24 45	19	63.16%	78.95%
1114	GSSPFG00003782001	>scaffold_23013_23354	GSSPFG00003782001.3-RA_52372-52596	92.00	-17.71	2 22	132158	24	50.00%	70.83%
1115	GSSPFG00007477001	>scaffold_23013_23354	GSSPFG00007477001-RA_4860-5873	115.00	-22.44	2 22	746767	20	45.00%	80.00%
1116	GSSPFG00007477001	>scaffold_23013_23354	GSSPFG00007477001-RA_4860-5873	98.00	-18.13	5 21	405426	16	75.00%	87.50%
1117	GSSPFG00024288001	>scaffold_23013_23354	GSSPFG00024288001.2-RB_880-1380	92.00	-17.69	2 22	106129	21	61.90%	61.90%
1118	GSSPFG00034551001	>scaffold_23013_23354	GSSPFG00034551001-RA_5093-6352	130.00	-21.91	4 19	90112	15	80.00%	86.67%
1119	GSSPFG00026010001	>scaffold_23013_23354	GSSPFG00026010001-RA_59958-60824	139.00	-31.93	2 22	273298	23	56.52%	82.61%
1120	GSSPFG00026010001	>scaffold_23013_23354	GSSPFG00026010001-RA_59958-60824	125.00	-18.36	2 19	294317	18	61.11%	83.33%
1121	GSSPFG00026010001	>scaffold_23013_23354	GSSPFG00026010001-RA_59958-60824	95.00	-20.24	2 21	179205	23	56.52%	78.26%
1122	GSSPFG00026016001	>scaffold_23013_23354	GSSPFG00026016001-RA_120892-121521	112.00	-17.66	2 22	552575	21	52.38%	80.95%
1123	GSSPFG00026017001	>scaffold_23013_23354	GSSPFG00026017001-RA_123292-124012	116.00	-17.59	2 20	453473	18	66.67%	83.33%
1124	GSSPFG00026017001	>scaffold_23013_23354	GSSPFG00026017001-RA_123292-124012	104.00	-21.70	3 22	629653	21	57.14%	80.95%
1125	GSSPFG00026017001	>scaffold_23013_23354	GSSPFG00026017001-RA_123292-124012	100.00	-17.81	2 19	407428	17	64.71%	82.35%
1126	GSSPFG00026021001	>scaffold_23013_23354	GSSPFG00026021001-RA_192335-192472	109.00	-18.32	2 22	87109	20	55.00%	85.00%
1127	GSSPFG00008668001	>scaffold_23013_23354	GSSPFG00008668001.3-RA_24232-24843	126.00	-21.70	2 22	241263	21	57.14%	85.71%
1128	GSSPFG00008668001	>scaffold_23013_23354	GSSPFG00008668001.3-RA_24232-24843	107.00	-20.42	2 22	520541	20	55.00%	90.00%
1129	GSSPFG00003907001	>scaffold_23013_23354	GSSPFG00003907001.3-RA_55057-55927	137.00	-17.12	2 22	193215	20	55.00%	75.00%
1130	GSSPFG00003907001	>scaffold_23013_23354	GSSPFG00003907001.3-RA_55057-55927	113.00	-17.48	3 18	822844	15	60.00%	93.33%
1131	GSSPFG00003910001	>scaffold_23013_23354	GSSPFG00003910001-RA_64730-64901	96.00	-19.84	4 22	47 71	20	60.00%	80.00%
1132	GSSPFG00032504001	>scaffold_23013_23354	GSSPFG00032504001-RA_2955-3894	121.00	-18.21	2 22	741763	20	65.00%	75.00%
1133	GSSPFG00033381001	>scaffold_23013_23354	GSSPFG00033381001-RA_2112-2826	128.00	-23.34	2 21	74 96	19	57.89%	94.74%
1134	GSSPFG00033381001	>scaffold_23013_23354	GSSPFG00033381001-RA_2112-2826	127.00	-26.58	2 22	630658	26	65.38%	76.92%
1135	GSSPFG00033381001	>scaffold_23013_23354	GSSPFG00033381001-RA_2112-2826	108.00	-20.22	2 22	555574	20	60.00%	80.00%
1136	GSSPFG00007073001	>scaffold_23013_23354	GSSPFG00007073001-RA_5412-6228	120.00	-20.02	2 21	379401	19	63.16%	78.95%
1137	GSSPFG00007073001	>scaffold_23013_23354	GSSPFG00007073001-RA_5412-6228	94.00	-17.60	2 22	443468	24	62.50%	75.00%
1138	GSSPFG00019913001	>scaffold_23013_23354	GSSPFG00019913001-RA_729-771	102.00	-21.83	2 22	15 38	22	50.00%	77.27%
1139	GSSPFG00017198001	>scaffold_23013_23354	GSSPFG00017198001-RA_3076-3328	94.00	-20.24	2 21	64 90	23	56.52%	73.91%
1140	GSSPFG00013034001	>scaffold_23013_23354	GSSPFG00013034001.3-RA_3203-4847	161.00	-27.79	2 18	14341456	16	81.25%	81.25%
1141	GSSPFG00013034001	>scaffold_23013_23354	GSSPFG00013034001.3-RA_3203-4847	125.00	-24.20	2 22	472495	21	61.90%	76.19%
1142	GSSPFG00013034001	>scaffold_23013_23354	GSSPFG00013034001.3-RA_3203-4847	123.00	-19.41	2 22	424449	23	56.52%	78.26%
1143	GSSPFG00013034001	>scaffold_23013_23354	GSSPFG00013034001.3-RA_3203-4847	118.00	-18.62	3 19	611633	16	62.50%	75.00%
1144	GSSPFG00013034001	>scaffold_23013_23354	GSSPFG00013034001.3-RA_3203-4847	113.00	-17.82	3 18	273296	16	75.00%	87.50%
1145	GSSPFG00013034001	>scaffold_23013_23354	GSSPFG00013034001.3-RA_3203-4847	103.00	-18.99	2 21	838861	20	55.00%	70.00%
1146	GSSPFG00013034001	>scaffold_23013_23354	GSSPFG00013034001.3-RA_3203-4847	97.00	-22.37	3 19	7 30	17	70.59%	76.47%
1147	GSSPFG00013034001	>scaffold_23013_23354	GSSPFG00013034001.3-RA_3203-4847	96.00	-17.13	5 22	769792	18	55.56%	77.78%
1148	GSSPFG00013034001	>scaffold_23013_23354	GSSPFG00013034001.3-RA_3203-4847	95.00	-18.86	2 18	10301051	16	62.50%	81.25%
1149	GSSPFG00016380001	>scaffold_23013_23354	GSSPFG00016380001-RA_453-1026	131.00	-29.59	3 22	40 66	23	69.57%	78.26%
1150	GSSPFG00016380001	>scaffold_23013_23354	GSSPFG00016380001-RA_453-1026	104.00	-19.21	2 22	6 30	22	63.64%	81.82%
1151	GSSPFG00016380001	>scaffold_23013_23354	GSSPFG00016380001-RA_453-1026	95.00	-17.58	3 22	64 84	20	60.00%	75.00%
1152	GSSPFG00028010001	>scaffold_23013_23354	GSSPFG00028010001-RA_3904-4624	127.00	-18.51	2 16	344366	14	64.29%	92.86%
1153	GSSPFG00028010001	>scaffold_23013_23354	GSSPFG00028010001-RA_3904-4624	125.00	-20.00	2 14	527549	12	66.67%	100.00%
1154	GSSPFG00028010001	>scaffold_23013_23354	GSSPFG00028010001-RA_3904-4624	122.00	-19.10	2 22	577600	22	63.64%	72.73%
1155	GSSPFG00003276001	>scaffold_23013_23354	GSSPFG00003276001-RA_228-273	115.00	-17.05	3 21	1 21	19	57.89%	89.47%
1156	GSSPFG00018948001	>scaffold_23013_23354	GSSPFG00018948001-RA_1942-2763	150.00	-24.54	2 20	277300	19	73.68%	84.21%
1157	GSSPFG00018948001	>scaffold_23013_23354	GSSPFG00018948001-RA_1942-2763	93.00	-17.65	2 22	261283	20	50.00%	70.00%
1158	GSSPFG00035666001	>scaffold_23013_23354	GSSPFG00035666001.2-RA_1430-2289	132.00	-31.13	3 21	56 78	18	72.22%	94.44%
1159	GSSPFG00035666001	>scaffold_23013_23354	GSSPFG00035666001.2-RA_1430-2289	132.00	-18.84	2 21	92114	19	57.89%	84.21%
1160	GSSPFG00035666001	>scaffold_23013_23354	GSSPFG00035666001.2-RA_1430-2289	123.00	-17.70	2 16	825847	14	57.14%	92.86%
1161	GSSPFG00035666001	>scaffold_23013_23354	GSSPFG00035666001.2-RA_1430-2289	120.00	-25.75	2 22	177200	21	57.14%	71.43%
1162	GSSPFG00035666001	>scaffold_23013_23354	GSSPFG00035666001.2-RA_1430-2289	116.00	-17.92	3 21	77 99	18	66.67%	77.78%
1163	GSSPFG00035666001	>scaffold_23013_23354	GSSPFG00035666001.2-RA_1430-2289	111.00	-17.47	2 14	487508	12	75.00%	75.00%
1164	GSSPFG00035666001	>scaffold_23013_23354	GSSPFG00035666001.2-RA_1430-2289	104.00	-17.16	2 8	267289	6	83.33%	100.00%
1165	GSSPFG00035666001	>scaffold_23013_23354	GSSPFG00035666001.2-RA_1430-2289	99.00	-20.77	3 22	114135	19	57.89%	68.42%
1166	GSSPFG00035666001	>scaffold_23013_23354	GSSPFG00035666001.2-RA_1430-2289	98.00	-25.95	3 21	28 58	26	57.69%	65.38%
1167	GSSPFG00025825001	>scaffold_23013_23354	GSSPFG00025825001-RA_33447-34938	133.00	-21.33	2 21	167187	19	57.89%	78.95%
1168	GSSPFG00025825001	>scaffold_23013_23354	GSSPFG00025825001-RA_33447-34938	129.00	-18.00	2 21	282304	20	65.00%	85.00%
1169	GSSPFG00025825001	>scaffold_23013_23354	GSSPFG00025825001-RA_33447-34938	123.00	-21.72	2 16	25 47	14	64.29%	85.71%
1170	GSSPFG00025825001	>scaffold_23013_23354	GSSPFG00025825001-RA_33447-34938	118.00	-22.93	2 20	59 82	19	63.16%	84.21%
1171	GSSPFG00025825001	>scaffold_23013_23354	GSSPFG00025825001-RA_33447-34938	107.00	-21.73	2 22	446472	24	54.17%	75.00%
1172	GSSPFG00025825001	>scaffold_23013_23354	GSSPFG00025825001-RA_33447-34938	107.00	-17.81	5 22	637658	17	70.59%	82.35%
1173	GSSPFG00025825001	>scaffold_23013_23354	GSSPFG00025825001-RA_33447-34938	100.00	-21.07	2 7	115137	5	100.00%	100.00%
1174	GSSPFG00025825001	>scaffold_23013_23354	GSSPFG00025825001-RA_33447-34938	100.00	-17.23	5 22	952976	19	68.42%	84.21%
1175	GSSPFG00025825001	>scaffold_23013_23354	GSSPFG00025825001-RA_33447-34938	94.00	-17.59	3 15	13061328	12	66.67%	91.67%
1176	GSSPFG00025825001	>scaffold_23013_23354	GSSPFG00025825001-RA_33447-34938	91.00	-21.82	1 22	11511174	23	52.17%	73.91%
1177	GSSPFG00033327001	>scaffold_23013_23354	GSSPFG00033327001-RA_2971-4387	109.00	-20.84	4 18	10931115	14	64.29%	92.86%
1178	GSSPFG00009944001	>scaffold_23013_23354	GSSPFG00009944001-RA_2701-2831	105.00	-23.87	2 22	105127	20	60.00%	75.00%
1179	GSSPFG00030409001	>scaffold_23013_23354	GSSPFG00030409001-RA_1314-2514	112.00	-17.12	2 20	39 61	19	57.89%	73.68%
1180	GSSPFG00030409001	>scaffold_23013_23354	GSSPFG00030409001-RA_1314-2514	102.00	-17.90	2 19	207229	17	47.06%	76.47%
1181	GSSPFG00030409001	>scaffold_23013_23354	GSSPFG00030409001-RA_1314-2514	90.00	-25.39	3 20	229252	18	55.56%	77.78%
1182	GSSPFG00022069001	>scaffold_23013_23354	GSSPFG00022069001-RA_5576-5975	110.00	-20.08	2 11	32 55	10	80.00%	90.00%
1183	GSSPFG00022069001	>scaffold_23013_23354	GSSPFG00022069001-RA_5576-5975	108.00	-18.17	2 22	113137	22	54.55%	72.73%
1184	GSSPFG00029091001	>scaffold_23013_23354	GSSPFG00029091001-RA_66529-67416	96.00	-18.79	3 22	828852	21	57.14%	76.19%
1185	GSSPFG00003450001	>scaffold_23013_23354	GSSPFG00003450001-RA_1040-1599	112.00	-19.99	2 22	2 25	21	57.14%	76.19%
1186	GSSPFG00020366001	>scaffold_23013_23354	GSSPFG00020366001-RA_35224-36613	143.00	-23.33	2 22	862886	22	59.09%	86.36%
1187	GSSPFG00020366001	>scaffold_23013_23354	GSSPFG00020366001-RA_35224-36613	142.00	-20.88	2 20	595620	21	66.67%	76.19%
1188	GSSPFG00020366001	>scaffold_23013_23354	GSSPFG00020366001-RA_35224-36613	124.00	-19.53	2 22	458484	24	54.17%	75.00%
1189	GSSPFG00020366001	>scaffold_23013_23354	GSSPFG00020366001-RA_35224-36613	97.00	-18.62	2 22	10461067	21	42.86%	80.95%
1190	GSSPFG00020366001	>scaffold_23013_23354	GSSPFG00020366001-RA_35224-36613	96.00	-18.04	5 22	10671091	19	68.42%	78.95%
1191	GSSPFG00020366001	>scaffold_23013_23354	GSSPFG00020366001-RA_35224-36613	90.00	-18.80	2 21	13551377	20	65.00%	70.00%
1192	GSSPFG00017289001	>scaffold_23013_23354	GSSPFG00017289001-RA_1855-2309	101.00	-20.71	2 19	62 85	18	50.00%	77.78%
1193	GSSPFG00026857001	>scaffold_23013_23354	GSSPFG00026857001.5-RA_4872-6214	121.00	-17.61	2 22	11041126	20	65.00%	75.00%
1194	GSSPFG00026857001	>scaffold_23013_23354	GSSPFG00026857001.5-RA_4872-6214	98.00	-17.51	4 21	740766	21	57.14%	76.19%
1195	GSSPFG00004280001	>scaffold_23013_23354	GSSPFG00004280001-RA_8268-9754	130.00	-17.87	3 19	189211	16	68.75%	87.50%
1196	GSSPFG00004280001	>scaffold_23013_23354	GSSPFG00004280001-RA_8268-9754	116.00	-17.30	2 20	297323	22	68.18%	68.18%
1197	GSSPFG00033685001	>scaffold_23013_23354	GSSPFG00033685001-RA_6548-6637	130.00	-22.17	2 22	27 50	22	68.18%	77.27%
1198	GSSPFG00026332001	>scaffold_23013_23354	GSSPFG00026332001-RA_1142-1779	120.00	-18.76	2 8	447469	6	100.00%	100.00%
1199	GSSPFG00026332001	>scaffold_23013_23354	GSSPFG00026332001-RA_1142-1779	108.00	-18.95	3 22	276295	19	68.42%	78.95%
1200	GSSPFG00006149001	>scaffold_23013_23354	GSSPFG00006149001-RA_265039-266107	91.00	-17.59	3 22	440467	24	58.33%	70.83%
1201	GSSPFG00006155001	>scaffold_23013_23354	GSSPFG00006155001-RA_428743-429572	131.00	-19.19	2 12	96118	10	70.00%	100.00%
1202	GSSPFG00006155001	>scaffold_23013_23354	GSSPFG00006155001-RA_428743-429572	104.00	-20.04	3 22	547573	23	60.87%	65.22%
1203	GSSPFG00033256001	>scaffold_23013_23354	GSSPFG00033256001-RA_1557-1900	127.00	-18.23	3 22	78103	22	63.64%	81.82%
1204	GSSPFG00000284001	>scaffold_23013_23354	GSSPFG00000284001-RA_1715-3090	108.00	-17.96	2 22	541560	20	55.00%	85.00%
1205	GSSPFG00000284001	>scaffold_23013_23354	GSSPFG00000284001-RA_1715-3090	95.00	-20.19	6 22	414435	16	68.75%	93.75%
1206	GSSPFG00000284001	>scaffold_23013_23354	GSSPFG00000284001-RA_1715-3090	93.00	-17.21	2 22	11581180	20	45.00%	75.00%
1207	GSSPFG00030897001	>scaffold_23013_23354	GSSPFG00030897001-RA_16678-16984	110.00	-19.16	2 22	143169	24	62.50%	83.33%
1208	GSSPFG00030897001	>scaffold_23013_23354	GSSPFG00030897001-RA_16678-16984	100.00	-19.84	2 7	34 56	5	100.00%	100.00%
1209	GSSPFG00030898001	>scaffold_23013_23354	GSSPFG00030898001-RA_48483-48685	100.00	-18.44	2 21	80102	19	57.89%	73.68%
1210	GSSPFG00016962001	>scaffold_23013_23354	GSSPFG00016962001-RA_3199-4527	123.00	-18.35	2 22	614638	22	59.09%	77.27%
1211	GSSPFG00016962001	>scaffold_23013_23354	GSSPFG00016962001-RA_3199-4527	116.00	-23.59	3 20	593615	18	72.22%	88.89%
1212	GSSPFG00016962001	>scaffold_23013_23354	GSSPFG00016962001-RA_3199-4527	110.00	-18.10	2 22	12681290	21	52.38%	85.71%
1213	GSSPFG00015897001	>scaffold_23013_23354	GSSPFG00015897001-RA_3212-4277	121.00	-18.62	2 19	271294	18	55.56%	83.33%
1214	GSSPFG00015897001	>scaffold_23013_23354	GSSPFG00015897001-RA_3212-4277	96.00	-22.52	2 22	161185	22	59.09%	81.82%
1215	GSSPFG00016853001	>scaffold_23013_23354	GSSPFG00016853001-RA_5090-5435	104.00	-17.77	2 22	74 93	20	60.00%	75.00%
1216	GSSPFG00015156001	>scaffold_23013_23354	GSSPFG00015156001-RA_3743-4649	108.00	-18.78	5 19	155176	14	78.57%	92.86%
1217	GSSPFG00029158001	>scaffold_23013_23354	GSSPFG00029158001-RA_47299-48670	143.00	-23.90	2 22	91112	20	65.00%	80.00%
1218	GSSPFG00029158001	>scaffold_23013_23354	GSSPFG00029158001-RA_47299-48670	117.00	-17.80	2 22	390412	20	60.00%	75.00%
1219	GSSPFG00029158001	>scaffold_23013_23354	GSSPFG00029158001-RA_47299-48670	90.00	-17.05	2 20	493518	21	52.38%	71.43%
1220	GSSPFG00026807001	>scaffold_23013_23354	GSSPFG00026807001-RA_15320-16282	122.00	-20.84	2 20	198221	19	57.89%	78.95%
1221	GSSPFG00026807001	>scaffold_23013_23354	GSSPFG00026807001-RA_15320-16282	107.00	-18.08	3 20	813835	17	52.94%	82.35%
1222	GSSPFG00026807001	>scaffold_23013_23354	GSSPFG00026807001-RA_15320-16282	102.00	-17.02	3 21	172193	18	66.67%	83.33%
1223	GSSPFG00026807001	>scaffold_23013_23354	GSSPFG00026807001-RA_15320-16282	97.00	-18.63	2 22	880901	21	66.67%	80.95%
1224	GSSPFG00026812001	>scaffold_23013_23354	GSSPFG00026812001-RA_66046-66471	108.00	-17.74	2 22	194219	23	56.52%	82.61%
1225	GSSPFG00019409001	>scaffold_23013_23354	GSSPFG00019409001-RA_253-1130	119.00	-20.59	2 22	459487	26	57.69%	76.92%
1226	GSSPFG00019409001	>scaffold_23013_23354	GSSPFG00019409001-RA_253-1130	99.00	-25.57	2 22	562583	20	60.00%	75.00%
1227	GSSPFG00019409001	>scaffold_23013_23354	GSSPFG00019409001-RA_253-1130	91.00	-19.04	2 22	259286	25	60.00%	72.00%
1228	GSSPFG00010046001	>scaffold_23013_23354	GSSPFG00010046001-RA_2755-3340	119.00	-17.34	2 21	180199	19	63.16%	78.95%
1229	GSSPFG00027037001	>scaffold_23013_23354	GSSPFG00027037001-RA_1991-2637	102.00	-18.40	2 21	283305	20	65.00%	85.00%
1230	GSSPFG00027037001	>scaffold_23013_23354	GSSPFG00027037001-RA_1991-2637	96.00	-18.63	4 22	196221	21	57.14%	80.95%
1231	GSSPFG00027037001	>scaffold_23013_23354	GSSPFG00027037001-RA_1991-2637	96.00	-17.37	2 17	208230	15	53.33%	86.67%
1232	GSSPFG00013456001	>scaffold_23013_23354	GSSPFG00013456001-RA_2131-2735	102.00	-17.22	2 22	413436	22	59.09%	81.82%
1233	GSSPFG00013456001	>scaffold_23013_23354	GSSPFG00013456001-RA_2131-2735	92.00	-17.97	2 22	18 43	23	56.52%	78.26%
1234	GSSPFG00024501001	>scaffold_23013_23354	GSSPFG00024501001-RA_64769-65155	143.00	-23.22	2 18	316341	19	73.68%	84.21%
1235	GSSPFG00024501001	>scaffold_23013_23354	GSSPFG00024501001-RA_64769-65155	91.00	-17.21	5 21	40 65	19	63.16%	63.16%
1236	GSSPFG00001071001	>scaffold_23013_23354	GSSPFG00001071001-RA_245-506	112.00	-19.08	2 22	75 98	21	47.62%	85.71%
1237	GSSPFG00006300001	>scaffold_23013_23354	GSSPFG00006300001-RA_3621-4961	134.00	-23.84	2 21	11661190	21	66.67%	85.71%
1238	GSSPFG00006300001	>scaffold_23013_23354	GSSPFG00006300001-RA_3621-4961	113.00	-17.89	2 15	780803	14	64.29%	78.57%
1239	GSSPFG00006300001	>scaffold_23013_23354	GSSPFG00006300001-RA_3621-4961	104.00	-20.27	2 8	10661088	6	83.33%	100.00%
1240	GSSPFG00006300001	>scaffold_23013_23354	GSSPFG00006300001-RA_3621-4961	100.00	-17.11	2 22	531550	20	70.00%	75.00%
1241	GSSPFG00006300001	>scaffold_23013_23354	GSSPFG00006300001-RA_3621-4961	96.00	-17.73	2 19	763785	18	55.56%	77.78%
1242	GSSPFG00006613001	>scaffold_23013_23354	GSSPFG00006613001-RA_4227-5611	144.00	-23.17	2 21	552572	19	68.42%	89.47%
1243	GSSPFG00000835001	>scaffold_23013_23354	GSSPFG00000835001-RA_5723-6030	127.00	-20.78	2 22	18 42	22	63.64%	77.27%
1244	GSSPFG00000835001	>scaffold_23013_23354	GSSPFG00000835001-RA_5723-6030	106.00	-17.99	2 21	128153	22	59.09%	72.73%
1245	GSSPFG00000835001	>scaffold_23013_23354	GSSPFG00000835001-RA_5723-6030	104.00	-18.17	2 8	34 56	6	83.33%	100.00%
1246	GSSPFG00006768001	>scaffold_23013_23354	GSSPFG00006768001-RA_1043-1341	128.00	-20.70	2 22	76 99	21	61.90%	76.19%
1247	GSSPFG00006768001	>scaffold_23013_23354	GSSPFG00006768001-RA_1043-1341	126.00	-22.29	2 21	271293	20	70.00%	80.00%
1248	GSSPFG00006768001	>scaffold_23013_23354	GSSPFG00006768001-RA_1043-1341	122.00	-20.23	3 21	1 21	18	61.11%	83.33%
1249	GSSPFG00006768001	>scaffold_23013_23354	GSSPFG00006768001-RA_1043-1341	106.00	-27.80	2 22	242262	20	60.00%	85.00%
1250	GSSPFG00016043001	>scaffold_23013_23354	GSSPFG00016043001-RA_4710-6128	108.00	-18.00	2 22	9761001	23	56.52%	82.61%
1251	GSSPFG00016043001	>scaffold_23013_23354	GSSPFG00016043001-RA_4710-6128	105.00	-18.08	2 14	13541376	12	66.67%	83.33%
1252	GSSPFG00016043001	>scaffold_23013_23354	GSSPFG00016043001-RA_4710-6128	91.00	-22.36	4 22	13161337	18	66.67%	88.89%
1253	GSSPFG00022344001	>scaffold_23013_23354	GSSPFG00022344001-RA_45221-46621	92.00	-22.86	2 22	306328	22	63.64%	72.73%
1254	GSSPFG00005259001	>scaffold_23013_23354	GSSPFG00005259001-RA_2417-2984	94.00	-18.39	4 15	127149	11	81.82%	90.91%
1255	GSSPFG00005259001	>scaffold_23013_23354	GSSPFG00005259001-RA_2417-2984	94.00	-17.27	2 19	232254	17	47.06%	82.35%
1256	GSSPFG00005259001	>scaffold_23013_23354	GSSPFG00005259001-RA_2417-2984	90.00	-20.10	2 22	88109	21	57.14%	76.19%
1257	GSSPFG00033356001	>scaffold_23013_23354	GSSPFG00033356001-RA_28799-30028	134.00	-17.15	2 15	961983	13	76.92%	100.00%
1258	GSSPFG00033356001	>scaffold_23013_23354	GSSPFG00033356001-RA_28799-30028	123.00	-23.04	2 20	429451	18	66.67%	83.33%
1259	GSSPFG00033356001	>scaffold_23013_23354	GSSPFG00033356001-RA_28799-30028	108.00	-20.72	2 22	9971021	22	63.64%	77.27%
1260	GSSPFG00033356001	>scaffold_23013_23354	GSSPFG00033356001-RA_28799-30028	107.00	-17.98	2 21	558581	20	50.00%	80.00%
1261	GSSPFG00033357001	>scaffold_23013_23354	GSSPFG00033357001-RA_31118-31285	117.00	-17.55	2 22	90112	20	55.00%	80.00%
1262	GSSPFG00033357001	>scaffold_23013_23354	GSSPFG00033357001-RA_31118-31285	95.00	-18.99	2 22	47 68	20	50.00%	80.00%
1263	GSSPFG00033365001	>scaffold_23013_23354	GSSPFG00033365001-RA_64536-64731	112.00	-18.97	4 22	17 40	19	57.89%	89.47%
1264	GSSPFG00000160001	>scaffold_23013_23354	GSSPFG00000160001-RA_4991-6075	127.00	-18.20	2 22	751776	23	60.87%	78.26%
1265	GSSPFG00000160001	>scaffold_23013_23354	GSSPFG00000160001-RA_4991-6075	124.00	-21.46	3 22	681705	21	57.14%	80.95%
1266	GSSPFG00000160001	>scaffold_23013_23354	GSSPFG00000160001-RA_4991-6075	121.00	-19.66	2 20	928949	18	61.11%	77.78%
1267	GSSPFG00000160001	>scaffold_23013_23354	GSSPFG00000160001-RA_4991-6075	102.00	-18.05	2 22	826846	20	60.00%	80.00%
1268	GSSPFG00000160001	>scaffold_23013_23354	GSSPFG00000160001-RA_4991-6075	100.00	-26.46	2 22	58 82	22	59.09%	86.36%
1269	GSSPFG00000160001	>scaffold_23013_23354	GSSPFG00000160001-RA_4991-6075	96.00	-21.49	3 22	429454	22	54.55%	72.73%
1270	GSSPFG00020734001	>scaffold_23013_23354	GSSPFG00020734001-RA_818-1137	116.00	-21.39	4 22	124149	21	61.90%	71.43%
1271	GSSPFG00002143001	>scaffold_23013_23354	GSSPFG00002143001-RA_15937-16024	118.00	-17.12	3 20	1 23	18	61.11%	77.78%
1272	GSSPFG00002145001	>scaffold_23013_23354	GSSPFG00002145001-RA_30324-31794	152.00	-20.87	2 22	172196	22	59.09%	77.27%
1273	GSSPFG00002145001	>scaffold_23013_23354	GSSPFG00002145001-RA_30324-31794	121.00	-20.76	2 18	12 34	16	68.75%	87.50%
1274	GSSPFG00002145001	>scaffold_23013_23354	GSSPFG00002145001-RA_30324-31794	105.00	-18.25	3 21	355378	20	55.00%	85.00%
1275	GSSPFG00002145001	>scaffold_23013_23354	GSSPFG00002145001-RA_30324-31794	102.00	-18.90	2 15	892914	13	61.54%	100.00%
1276	GSSPFG00002145001	>scaffold_23013_23354	GSSPFG00002145001-RA_30324-31794	96.00	-19.92	2 21	402424	19	63.16%	78.95%
1277	GSSPFG00020430001	>scaffold_23013_23354	GSSPFG00020430001-RA_2763-3961	123.00	-21.53	2 22	699727	26	57.69%	73.08%
1278	GSSPFG00020430001	>scaffold_23013_23354	GSSPFG00020430001-RA_2763-3961	106.00	-18.21	2 21	482509	24	54.17%	75.00%
1279	GSSPFG00017025001	>scaffold_23013_23354	GSSPFG00017025001-RA_3632-4369	103.00	-21.23	3 21	605628	19	68.42%	78.95%
1280	GSSPFG00017030001	>scaffold_23013_23354	GSSPFG00017030001-RA_27812-28283	104.00	-18.23	2 22	387410	21	61.90%	76.19%
1281	GSSPFG00018615001	>scaffold_23013_23354	GSSPFG00018615001-RA_9151-9354	114.00	-21.06	3 22	152172	19	63.16%	84.21%
1282	GSSPFG00026116001	>scaffold_23013_23354	GSSPFG00026116001-RA_4738-4893	107.00	-18.99	4 20	8 30	16	62.50%	81.25%
1283	GSSPFG00006301001	>scaffold_23013_23354	GSSPFG00006301001.3-RA_16780-18001	124.00	-18.45	2 20	11531173	18	66.67%	77.78%
1284	GSSPFG00006301001	>scaffold_23013_23354	GSSPFG00006301001.3-RA_16780-18001	100.00	-21.84	3 22	779803	21	52.38%	85.71%
1285	GSSPFG00035909001	>scaffold_23013_23354	GSSPFG00035909001.2-RA_5661-5897	131.00	-22.23	2 22	117143	24	62.50%	79.17%
1286	GSSPFG00013844001	>scaffold_23013_23354	GSSPFG00013844001-RA_28531-28643	150.00	-19.76	2 21	27 48	19	68.42%	73.68%
1287	GSSPFG00013845001	>scaffold_23013_23354	GSSPFG00013845001-RA_39777-40246	164.00	-24.41	2 22	17 41	22	68.18%	81.82%
1288	GSSPFG00013845001	>scaffold_23013_23354	GSSPFG00013845001-RA_39777-40246	109.00	-18.83	2 19	144168	19	57.89%	78.95%
1289	GSSPFG00031533001	>scaffold_23013_23354	GSSPFG00031533001-RA_12619-13043	132.00	-18.27	2 22	246269	21	57.14%	85.71%
1290	GSSPFG00031547001	>scaffold_23013_23354	GSSPFG00031547001-RA_185384-185450	100.00	-19.01	2 21	29 50	20	50.00%	80.00%
1291	GSSPFG00031548001	>scaffold_23013_23354	GSSPFG00031548001-RA_188287-188988	108.00	-17.83	2 22	195222	25	56.00%	68.00%
1292	GSSPFG00031548001	>scaffold_23013_23354	GSSPFG00031548001-RA_188287-188988	105.00	-20.80	3 14	311333	11	72.73%	90.91%
1293	GSSPFG00031548001	>scaffold_23013_23354	GSSPFG00031548001-RA_188287-188988	103.00	-18.27	2 12	324346	10	70.00%	90.00%
1294	GSSPFG00031549001	>scaffold_23013_23354	GSSPFG00031549001-RA_192963-193963	142.00	-18.91	2 22	530552	21	66.67%	80.95%
1295	GSSPFG00005453001	>scaffold_23013_23354	GSSPFG00005453001-RA_3826-5080	122.00	-23.93	2 21	903924	19	63.16%	89.47%
1296	GSSPFG00005453001	>scaffold_23013_23354	GSSPFG00005453001-RA_3826-5080	120.00	-22.51	2 22	12211246	23	60.87%	86.96%
1297	GSSPFG00005453001	>scaffold_23013_23354	GSSPFG00005453001-RA_3826-5080	112.00	-18.85	3 22	132157	22	68.18%	77.27%
1298	GSSPFG00005453001	>scaffold_23013_23354	GSSPFG00005453001-RA_3826-5080	111.00	-18.07	2 22	314335	20	60.00%	75.00%
1299	GSSPFG00005453001	>scaffold_23013_23354	GSSPFG00005453001-RA_3826-5080	105.00	-20.94	2 21	873897	22	54.55%	77.27%
1300	GSSPFG00005453001	>scaffold_23013_23354	GSSPFG00005453001-RA_3826-5080	94.00	-17.84	5 20	588614	19	63.16%	68.42%
1301	GSSPFG00031743001	>scaffold_23013_23354	GSSPFG00031743001-RA_3041-4088	105.00	-22.57	3 22	461481	19	57.89%	84.21%
1302	GSSPFG00031743001	>scaffold_23013_23354	GSSPFG00031743001-RA_3041-4088	95.00	-18.65	3 22	881906	22	59.09%	77.27%
1303	GSSPFG00007869001	>scaffold_23013_23354	GSSPFG00007869001-RA_96-1225	124.00	-20.35	2 21	575597	19	57.89%	73.68%
1304	GSSPFG00007869001	>scaffold_23013_23354	GSSPFG00007869001-RA_96-1225	105.00	-17.24	3 19	230253	17	47.06%	76.47%
1305	GSSPFG00026650001	>scaffold_23013_23354	GSSPFG00026650001-RA_1640-2611	125.00	-21.47	2 21	434454	19	63.16%	78.95%
1306	GSSPFG00007871001	>scaffold_23013_23354	GSSPFG00007871001.4-RA_5153-6110	116.00	-18.89	3 22	304327	20	65.00%	80.00%
1307	GSSPFG00007871001	>scaffold_23013_23354	GSSPFG00007871001.4-RA_5153-6110	115.00	-22.45	2 20	549571	18	66.67%	88.89%
1308	GSSPFG00007871001	>scaffold_23013_23354	GSSPFG00007871001.4-RA_5153-6110	108.00	-21.97	2 21	531554	20	50.00%	70.00%
1309	GSSPFG00007871001	>scaffold_23013_23354	GSSPFG00007871001.4-RA_5153-6110	107.00	-17.09	2 12	566588	10	80.00%	90.00%
1310	GSSPFG00027565001	>scaffold_23013_23354	GSSPFG00027565001.2-RA_560-1608	120.00	-23.16	3 22	20 44	21	61.90%	85.71%
1311	GSSPFG00027565001	>scaffold_23013_23354	GSSPFG00027565001.2-RA_560-1608	115.00	-18.87	2 22	401422	20	55.00%	85.00%
1312	GSSPFG00008153001	>scaffold_23013_23354	GSSPFG00008153001-RA_795-1685	109.00	-17.13	2 20	863889	22	59.09%	77.27%
1313	GSSPFG00008154001	>scaffold_23013_23354	GSSPFG00008154001-RA_4751-5918	92.00	-17.11	5 18	530553	14	71.43%	92.86%
1314	GSSPFG00023472001	>scaffold_23013_23354	GSSPFG00023472001-RA_10379-11681	105.00	-20.69	4 22	52 74	18	66.67%	83.33%
1315	GSSPFG00023472001	>scaffold_23013_23354	GSSPFG00023472001-RA_10379-11681	93.00	-21.19	3 19	911934	17	76.47%	82.35%
1316	GSSPFG00023472001	>scaffold_23013_23354	GSSPFG00023472001-RA_10379-11681	92.00	-18.85	2 22	114137	21	57.14%	66.67%
1317	GSSPFG00023478001	>scaffold_23013_23354	GSSPFG00023478001-RA_47396-48650	144.00	-19.47	2 22	742765	21	61.90%	80.95%
1318	GSSPFG00023478001	>scaffold_23013_23354	GSSPFG00023478001-RA_47396-48650	112.00	-18.39	2 22	677702	23	56.52%	73.91%
1319	GSSPFG00023478001	>scaffold_23013_23354	GSSPFG00023478001-RA_47396-48650	104.00	-20.26	2 22	282307	23	47.83%	73.91%
1320	GSSPFG00023479001	>scaffold_23013_23354	GSSPFG00023479001-RA_48932-50173	114.00	-17.77	2 21	231252	19	63.16%	78.95%
1321	GSSPFG00023481001	>scaffold_23013_23354	GSSPFG00023481001-RA_54515-55560	119.00	-22.71	2 22	726747	20	65.00%	80.00%
1322	GSSPFG00023481001	>scaffold_23013_23354	GSSPFG00023481001-RA_54515-55560	114.00	-18.83	2 21	93115	20	65.00%	85.00%
1323	GSSPFG00023482001	>scaffold_23013_23354	GSSPFG00023482001-RA_64526-65639	126.00	-17.69	2 19	412434	17	58.82%	82.35%
1324	GSSPFG00023482001	>scaffold_23013_23354	GSSPFG00023482001-RA_64526-65639	91.00	-18.64	4 22	37 63	22	59.09%	77.27%
1325	GSSPFG00016906001	>scaffold_23013_23354	GSSPFG00016906001-RA_2080-3142	146.00	-27.58	2 15	185207	13	76.92%	100.00%
1326	GSSPFG00016906001	>scaffold_23013_23354	GSSPFG00016906001-RA_2080-3142	116.00	-18.67	2 19	848869	17	52.94%	82.35%
1327	GSSPFG00016906001	>scaffold_23013_23354	GSSPFG00016906001-RA_2080-3142	96.00	-19.25	2 22	401423	22	72.73%	77.27%
1328	GSSPFG00016906001	>scaffold_23013_23354	GSSPFG00016906001-RA_2080-3142	94.00	-18.38	2 22	656679	22	63.64%	77.27%
1329	GSSPFG00026117001	>scaffold_23013_23354	GSSPFG00026117001-RA_4947-5734	107.00	-20.86	2 21	219245	23	60.87%	78.26%
1330	GSSPFG00026117001	>scaffold_23013_23354	GSSPFG00026117001-RA_4947-5734	100.00	-22.02	2 7	36 58	5	100.00%	100.00%
1331	GSSPFG00026121001	>scaffold_23013_23354	GSSPFG00026121001-RA_15503-16425	131.00	-24.28	2 20	195218	19	68.42%	84.21%
1332	GSSPFG00026121001	>scaffold_23013_23354	GSSPFG00026121001-RA_15503-16425	116.00	-20.66	2 21	773796	20	65.00%	80.00%
1333	GSSPFG00033072001	>scaffold_23013_23354	GSSPFG00033072001-RA_3812-4070	108.00	-17.20	3 22	141164	20	65.00%	85.00%
1334	GSSPFG00031082001	>scaffold_23013_23354	GSSPFG00031082001-RA_115-877	110.00	-22.38	2 21	639665	23	60.87%	73.91%
1335	GSSPFG00031082001	>scaffold_23013_23354	GSSPFG00031082001-RA_115-877	107.00	-17.32	3 22	344365	19	63.16%	73.68%
1336	GSSPFG00001086001	>scaffold_23013_23354	GSSPFG00001086001.3-RA_948-2427	111.00	-19.87	3 21	221246	21	61.90%	76.19%
1337	GSSPFG00001087001	>scaffold_23013_23354	GSSPFG00001087001-RA_4363-5272	92.00	-17.95	2 21	572594	19	47.37%	73.68%
1338	GSSPFG00001087001	>scaffold_23013_23354	GSSPFG00001087001-RA_4363-5272	90.00	-17.14	2 22	103125	21	52.38%	76.19%
1339	GSSPFG00023893001	>scaffold_23013_23354	GSSPFG00023893001-RA_2561-3349	124.00	-21.96	2 22	215238	21	57.14%	76.19%
1340	GSSPFG00023893001	>scaffold_23013_23354	GSSPFG00023893001-RA_2561-3349	97.00	-20.95	3 20	441468	22	68.18%	72.73%
1341	GSSPFG00015438001	>scaffold_23013_23354	GSSPFG00015438001-RA_4207-5019	109.00	-20.82	3 20	533554	17	64.71%	82.35%
1342	GSSPFG00015438001	>scaffold_23013_23354	GSSPFG00015438001-RA_4207-5019	102.00	-19.44	2 22	488508	20	60.00%	80.00%
1343	GSSPFG00010904001	>scaffold_23013_23354	GSSPFG00010904001-RA_120083-121113	95.00	-17.42	2 22	573595	21	61.90%	76.19%
1344	GSSPFG00010913001	>scaffold_23013_23354	GSSPFG00010913001-RA_168896-169607	130.00	-22.46	2 21	20 41	19	63.16%	84.21%
1345	GSSPFG00010913001	>scaffold_23013_23354	GSSPFG00010913001-RA_168896-169607	130.00	-23.05	2 19	355377	17	58.82%	88.24%
1346	GSSPFG00010913001	>scaffold_23013_23354	GSSPFG00010913001-RA_168896-169607	115.00	-18.90	2 22	5 26	20	65.00%	75.00%
1347	GSSPFG00010913001	>scaffold_23013_23354	GSSPFG00010913001-RA_168896-169607	112.00	-21.98	2 22	81104	21	57.14%	76.19%
1348	GSSPFG00010913001	>scaffold_23013_23354	GSSPFG00010913001-RA_168896-169607	111.00	-17.45	2 16	244266	14	57.14%	92.86%
1349	GSSPFG00010913001	>scaffold_23013_23354	GSSPFG00010913001-RA_168896-169607	104.00	-17.93	2 18	340365	19	52.63%	78.95%
1350	GSSPFG00010913001	>scaffold_23013_23354	GSSPFG00010913001-RA_168896-169607	100.00	-17.77	2 7	55 77	5	100.00%	100.00%
1351	GSSPFG00010913001	>scaffold_23013_23354	GSSPFG00010913001-RA_168896-169607	100.00	-18.56	4 22	491515	20	55.00%	75.00%
1352	GSSPFG00010913001	>scaffold_23013_23354	GSSPFG00010913001-RA_168896-169607	96.00	-19.27	2 22	120143	21	52.38%	76.19%
1353	GSSPFG00010914001	>scaffold_23013_23354	GSSPFG00010914001-RA_172057-172195	130.00	-18.25	3 21	1 26	21	66.67%	71.43%
1354	GSSPFG00010918001	>scaffold_23013_23354	GSSPFG00010918001-RA_211347-212810	139.00	-22.60	2 17	12801303	16	75.00%	81.25%
1355	GSSPFG00010918001	>scaffold_23013_23354	GSSPFG00010918001-RA_211347-212810	128.00	-17.44	2 18	694717	17	58.82%	94.12%
1356	GSSPFG00010918001	>scaffold_23013_23354	GSSPFG00010918001-RA_211347-212810	110.00	-17.44	2 21	219240	19	63.16%	73.68%
1357	GSSPFG00010918001	>scaffold_23013_23354	GSSPFG00010918001-RA_211347-212810	104.00	-17.57	2 8	12241246	6	83.33%	100.00%
1358	GSSPFG00010031001	>scaffold_23013_23354	GSSPFG00010031001-RA_7205-8435	152.00	-28.70	3 22	11501174	21	71.43%	85.71%
1359	GSSPFG00010031001	>scaffold_23013_23354	GSSPFG00010031001-RA_7205-8435	101.00	-19.84	4 22	174197	19	68.42%	84.21%
1360	GSSPFG00010031001	>scaffold_23013_23354	GSSPFG00010031001-RA_7205-8435	93.00	-20.90	3 22	801824	20	55.00%	80.00%
1361	GSSPFG00024056001	>scaffold_23013_23354	GSSPFG00024056001-RA_3079-4243	102.00	-18.37	2 21	301323	20	60.00%	75.00%
1362	GSSPFG00016270001	>scaffold_23013_23354	GSSPFG00016270001-RA_2134-2592	100.00	-17.13	5 22	27 50	18	61.11%	77.78%
1363	GSSPFG00016270001	>scaffold_23013_23354	GSSPFG00016270001-RA_2134-2592	100.00	-17.25	2 7	103125	5	100.00%	100.00%
1364	GSSPFG00016270001	>scaffold_23013_23354	GSSPFG00016270001-RA_2134-2592	100.00	-21.48	2 22	115141	24	58.33%	70.83%
1365	GSSPFG00002570001	>scaffold_23013_23354	GSSPFG00002570001-RA_3469-4428	111.00	-17.79	2 22	175196	20	50.00%	85.00%
1366	GSSPFG00033499001	>scaffold_23013_23354	GSSPFG00033499001-RA_3934-5241	126.00	-21.59	4 21	674695	17	64.71%	94.12%
1367	GSSPFG00033499001	>scaffold_23013_23354	GSSPFG00033499001-RA_3934-5241	117.00	-18.67	3 21	314341	23	60.87%	78.26%
1368	GSSPFG00033499001	>scaffold_23013_23354	GSSPFG00033499001-RA_3934-5241	116.00	-19.99	2 22	11821205	21	61.90%	76.19%
1369	GSSPFG00033499001	>scaffold_23013_23354	GSSPFG00033499001-RA_3934-5241	96.00	-17.79	3 22	173197	21	57.14%	76.19%
1370	GSSPFG00001429001	>scaffold_23013_23354	GSSPFG00001429001-RA_1247-2720	97.00	-17.30	3 22	369391	19	47.37%	84.21%
1371	GSSPFG00016457001	>scaffold_23013_23354	GSSPFG00016457001-RA_21482-21808	96.00	-19.24	2 22	262288	24	62.50%	70.83%
1372	GSSPFG00022843001	>scaffold_23013_23354	GSSPFG00022843001-RA_595-914	115.00	-18.06	2 22	129150	20	60.00%	80.00%
1373	GSSPFG00022843001	>scaffold_23013_23354	GSSPFG00022843001-RA_595-914	114.00	-17.92	2 21	56 77	19	57.89%	68.42%
1374	GSSPFG00006314001	>scaffold_23013_23354	GSSPFG00006314001-RA_1506-2515	111.00	-19.15	5 22	405426	17	70.59%	88.24%
1375	GSSPFG00006314001	>scaffold_23013_23354	GSSPFG00006314001-RA_1506-2515	105.00	-18.26	3 19	709732	17	58.82%	82.35%
1376	GSSPFG00006314001	>scaffold_23013_23354	GSSPFG00006314001-RA_1506-2515	100.00	-18.00	3 22	973999	23	47.83%	73.91%
1377	GSSPFG00006315001	>scaffold_23013_23354	GSSPFG00006315001-RA_3688-5066	138.00	-18.65	2 21	271292	19	73.68%	84.21%
1378	GSSPFG00006315001	>scaffold_23013_23354	GSSPFG00006315001-RA_3688-5066	118.00	-21.81	2 21	12051226	19	68.42%	78.95%
1379	GSSPFG00006315001	>scaffold_23013_23354	GSSPFG00006315001-RA_3688-5066	113.00	-19.87	3 14	901923	11	81.82%	100.00%
1380	GSSPFG00006315001	>scaffold_23013_23354	GSSPFG00006315001-RA_3688-5066	102.00	-17.52	2 20	632656	20	65.00%	75.00%
1381	GSSPFG00027456001	>scaffold_23013_23354	GSSPFG00027456001-RA_1164-1991	92.00	-18.38	2 19	504526	18	50.00%	77.78%
1382	GSSPFG00006633001	>scaffold_23013_23354	GSSPFG00006633001-RA_10290-11711	120.00	-19.68	3 22	752775	20	65.00%	85.00%
1383	GSSPFG00006633001	>scaffold_23013_23354	GSSPFG00006633001-RA_10290-11711	100.00	-18.52	5 22	12081230	19	73.68%	78.95%
1384	GSSPFG00006634001	>scaffold_23013_23354	GSSPFG00006634001-RA_12378-13034	151.00	-35.32	2 21	348371	20	75.00%	95.00%
1385	GSSPFG00006634001	>scaffold_23013_23354	GSSPFG00006634001-RA_12378-13034	125.00	-17.95	3 14	133155	11	81.82%	100.00%
1386	GSSPFG00006635001	>scaffold_23013_23354	GSSPFG00006635001-RA_16821-17459	103.00	-20.25	2 22	122147	23	56.52%	69.57%
1387	GSSPFG00006635001	>scaffold_23013_23354	GSSPFG00006635001-RA_16821-17459	93.00	-19.68	6 22	619639	16	68.75%	81.25%
1388	GSSPFG00006636001	>scaffold_23013_23354	GSSPFG00006636001-RA_17891-18895	133.00	-22.01	3 20	762783	17	64.71%	82.35%
1389	GSSPFG00006636001	>scaffold_23013_23354	GSSPFG00006636001-RA_17891-18895	128.00	-18.10	2 22	135158	21	57.14%	80.95%
1390	GSSPFG00006636001	>scaffold_23013_23354	GSSPFG00006636001-RA_17891-18895	120.00	-18.01	2 8	334356	6	100.00%	100.00%
1391	GSSPFG00006636001	>scaffold_23013_23354	GSSPFG00006636001-RA_17891-18895	115.00	-17.64	4 21	92116	19	57.89%	78.95%
1392	GSSPFG00006636001	>scaffold_23013_23354	GSSPFG00006636001-RA_17891-18895	100.00	-19.01	2 7	286308	5	100.00%	100.00%
1393	GSSPFG00007837001	>scaffold_23013_23354	GSSPFG00007837001-RA_4180-4993	119.00	-22.88	2 21	117140	20	60.00%	85.00%
1394	GSSPFG00019237001	>scaffold_23013_23354	GSSPFG00019237001-RA_2494-2662	105.00	-17.45	3 20	75 97	18	72.22%	77.78%
1395	GSSPFG00019237001	>scaffold_23013_23354	GSSPFG00019237001-RA_2494-2662	102.00	-20.96	2 22	1 22	21	71.43%	76.19%
1396	GSSPFG00029854001	>scaffold_23013_23354	GSSPFG00029854001-RA_29291-30844	120.00	-18.63	2 17	1 16	15	73.33%	86.67%
1397	GSSPFG00029854001	>scaffold_23013_23354	GSSPFG00029854001-RA_29291-30844	114.00	-18.30	2 22	426446	20	60.00%	80.00%
1398	GSSPFG00029854001	>scaffold_23013_23354	GSSPFG00029854001-RA_29291-30844	103.00	-18.46	2 21	622646	21	61.90%	76.19%
1399	GSSPFG00013387001	>scaffold_23013_23354	GSSPFG00013387001-RA_315244-315340	96.00	-18.91	4 22	40 65	21	61.90%	76.19%
1400	GSSPFG00013389001	>scaffold_23013_23354	GSSPFG00013389001-RA_380015-380316	102.00	-22.57	2 21	115136	19	63.16%	78.95%
1401	GSSPFG00013389001	>scaffold_23013_23354	GSSPFG00013389001-RA_380015-380316	99.00	-22.68	2 21	130154	21	57.14%	76.19%
1402	GSSPFG00012317001	>scaffold_23013_23354	GSSPFG00012317001-RA_3801-4407	127.00	-20.19	2 22	284309	23	56.52%	82.61%
1403	GSSPFG00015368001	>scaffold_23013_23354	GSSPFG00015368001-RA_17472-18685	104.00	-20.80	5 22	243266	18	61.11%	83.33%
1404	GSSPFG00015368001	>scaffold_23013_23354	GSSPFG00015368001-RA_17472-18685	95.00	-19.70	2 22	404425	20	50.00%	80.00%
1405	GSSPFG00031804001	>scaffold_23013_23354	GSSPFG00031804001-RA_60665-61470	136.00	-18.60	2 13	200222	11	72.73%	100.00%
1406	GSSPFG00035145001	>scaffold_23013_23354	GSSPFG00035145001.3-RA_3799-5045	128.00	-22.10	2 21	133152	19	63.16%	84.21%
1407	GSSPFG00035145001	>scaffold_23013_23354	GSSPFG00035145001.3-RA_3799-5045	124.00	-17.10	2 22	274298	22	59.09%	72.73%
1408	GSSPFG00035145001	>scaffold_23013_23354	GSSPFG00035145001.3-RA_3799-5045	103.00	-19.14	5 22	422443	17	70.59%	76.47%
1409	GSSPFG00035145001	>scaffold_23013_23354	GSSPFG00035145001.3-RA_3799-5045	103.00	-19.10	3 22	10391060	19	57.89%	73.68%
1410	GSSPFG00015372001	>scaffold_23013_23354	GSSPFG00015372001-RA_42031-43330	112.00	-23.06	4 22	700725	21	61.90%	80.95%
1411	GSSPFG00032502001	>scaffold_23013_23354	GSSPFG00032502001-RA_3360-3534	108.00	-25.88	2 19	127148	17	64.71%	76.47%
1412	GSSPFG00002981001	>scaffold_23013_23354	GSSPFG00002981001-RA_3739-5069	145.00	-21.91	2 19	964989	20	60.00%	75.00%
1413	GSSPFG00002981001	>scaffold_23013_23354	GSSPFG00002981001-RA_3739-5069	111.00	-19.38	3 22	917942	22	50.00%	77.27%
1414	GSSPFG00029337001	>scaffold_23013_23354	GSSPFG00029337001-RA_91170-91969	101.00	-17.52	6 22	609631	16	75.00%	87.50%
1415	GSSPFG00029337001	>scaffold_23013_23354	GSSPFG00029337001-RA_91170-91969	95.00	-17.22	5 21	66 89	17	70.59%	82.35%
1416	GSSPFG00029339001	>scaffold_23013_23354	GSSPFG00029339001-RA_121705-122363	115.00	-21.91	3 22	47 71	21	71.43%	76.19%
1417	GSSPFG00029339001	>scaffold_23013_23354	GSSPFG00029339001-RA_121705-122363	112.00	-17.86	2 22	284303	20	65.00%	80.00%
1418	GSSPFG00029339001	>scaffold_23013_23354	GSSPFG00029339001-RA_121705-122363	100.00	-20.49	3 22	14 38	21	52.38%	71.43%
1419	GSSPFG00029339001	>scaffold_23013_23354	GSSPFG00029339001-RA_121705-122363	91.00	-17.49	3 19	61 83	17	70.59%	76.47%
1420	GSSPFG00029339001	>scaffold_23013_23354	GSSPFG00029339001-RA_121705-122363	90.00	-17.46	2 22	297318	21	57.14%	76.19%
1421	GSSPFG00029343001	>scaffold_23013_23354	GSSPFG00029343001-RA_140697-141921	122.00	-20.43	3 22	123143	19	57.89%	84.21%
1422	GSSPFG00029343001	>scaffold_23013_23354	GSSPFG00029343001-RA_140697-141921	97.00	-17.12	2 22	106128	20	55.00%	70.00%
1423	GSSPFG00029346001	>scaffold_23013_23354	GSSPFG00029346001-RA_148132-148788	114.00	-17.80	3 22	459485	23	65.22%	82.61%
1424	GSSPFG00029346001	>scaffold_23013_23354	GSSPFG00029346001-RA_148132-148788	91.00	-17.25	3 22	319344	22	54.55%	77.27%
1425	GSSPFG00029348001	>scaffold_23013_23354	GSSPFG00029348001-RA_169816-170037	109.00	-18.44	2 22	65 87	20	50.00%	75.00%
1426	GSSPFG00029349001	>scaffold_23013_23354	GSSPFG00029349001-RA_175917-176694	100.00	-21.49	2 22	702725	21	57.14%	76.19%
1427	GSSPFG00029349001	>scaffold_23013_23354	GSSPFG00029349001-RA_175917-176694	97.00	-17.51	2 22	243262	20	55.00%	80.00%
1428	GSSPFG00024619001	>scaffold_23013_23354	GSSPFG00024619001-RA_566-1304	100.00	-17.29	2 7	175197	5	100.00%	100.00%
1429	GSSPFG00025746001	>scaffold_23013_23354	GSSPFG00025746001-RA_3139-4168	115.00	-18.49	2 16	1 16	14	71.43%	85.71%
1430	GSSPFG00025746001	>scaffold_23013_23354	GSSPFG00025746001-RA_3139-4168	112.00	-17.84	2 22	350376	24	58.33%	70.83%
1431	GSSPFG00009889001	>scaffold_23013_23354	GSSPFG00009889001-RA_3597-3835	127.00	-21.11	2 21	49 73	21	61.90%	76.19%
1432	GSSPFG00009889001	>scaffold_23013_23354	GSSPFG00009889001-RA_3597-3835	105.00	-17.43	3 19	15 38	17	58.82%	82.35%
1433	GSSPFG00009889001	>scaffold_23013_23354	GSSPFG00009889001-RA_3597-3835	104.00	-23.22	2 22	196219	21	52.38%	71.43%
1434	GSSPFG00009889001	>scaffold_23013_23354	GSSPFG00009889001-RA_3597-3835	103.00	-17.47	5 22	104129	20	65.00%	80.00%
1435	GSSPFG00009889001	>scaffold_23013_23354	GSSPFG00009889001-RA_3597-3835	98.00	-22.90	2 22	77 99	21	61.90%	76.19%
1436	GSSPFG00027973001	>scaffold_23013_23354	GSSPFG00027973001-RA_2109-2701	108.00	-19.70	2 22	483502	20	65.00%	75.00%
1437	GSSPFG00022865001	>scaffold_23013_23354	GSSPFG00022865001-RA_35864-36452	91.00	-18.10	3 21	128153	21	61.90%	76.19%
1438	GSSPFG00020016001	>scaffold_23013_23354	GSSPFG00020016001-RA_62815-63255	117.00	-20.51	3 20	30 51	17	76.47%	82.35%
1439	GSSPFG00020016001	>scaffold_23013_23354	GSSPFG00020016001-RA_62815-63255	95.00	-17.01	5 22	77102	20	65.00%	85.00%
1440	GSSPFG00020016001	>scaffold_23013_23354	GSSPFG00020016001-RA_62815-63255	94.00	-18.70	2 22	219242	22	59.09%	81.82%
1441	GSSPFG00004887001	>scaffold_23013_23354	GSSPFG00004887001-RA_2247-2462	124.00	-18.20	2 19	64 85	17	64.71%	82.35%
1442	GSSPFG00004887001	>scaffold_23013_23354	GSSPFG00004887001-RA_2247-2462	116.00	-28.08	3 22	38 65	24	50.00%	75.00%
1443	GSSPFG00004887001	>scaffold_23013_23354	GSSPFG00004887001-RA_2247-2462	113.00	-17.66	3 21	19 41	19	57.89%	78.95%
1444	GSSPFG00022864001	>scaffold_23013_23354	GSSPFG00022864001-RA_12595-13390	119.00	-19.56	2 22	194220	24	50.00%	79.17%
1445	GSSPFG00027585001	>scaffold_23013_23354	GSSPFG00027585001-RA_1337-1443	122.00	-22.48	2 22	74 98	23	60.87%	73.91%
1446	GSSPFG00027585001	>scaffold_23013_23354	GSSPFG00027585001-RA_1337-1443	98.00	-18.50	2 21	42 69	24	54.17%	75.00%
1447	GSSPFG00023618001	>scaffold_23013_23354	GSSPFG00023618001-RA_545-727	90.00	-21.40	2 22	119142	22	54.55%	72.73%
1448	GSSPFG00000351001	>scaffold_23013_23354	GSSPFG00000351001-RA_61989-63068	139.00	-22.74	2 17	320345	18	66.67%	83.33%
1449	GSSPFG00000351001	>scaffold_23013_23354	GSSPFG00000351001-RA_61989-63068	114.00	-23.74	2 22	304330	24	58.33%	83.33%
1450	GSSPFG00000351001	>scaffold_23013_23354	GSSPFG00000351001-RA_61989-63068	112.00	-17.96	2 18	550573	17	64.71%	82.35%
1451	GSSPFG00027717001	>scaffold_23013_23354	GSSPFG00027717001-RA_34089-34256	110.00	-17.70	2 22	124144	20	60.00%	75.00%
1452	GSSPFG00000999001	>scaffold_23013_23354	GSSPFG00000999001.3-RA_48794-50373	121.00	-17.30	2 20	136157	18	55.56%	83.33%
1453	GSSPFG00000999001	>scaffold_23013_23354	GSSPFG00000999001.3-RA_48794-50373	107.00	-20.02	2 22	246272	24	62.50%	75.00%
1454	GSSPFG00003596001	>scaffold_23013_23354	GSSPFG00003596001-RA_3904-4121	93.00	-18.18	6 20	23 44	14	78.57%	92.86%
1455	GSSPFG00020549001	>scaffold_23013_23354	GSSPFG00020549001-RA_1831-2958	135.00	-19.63	2 20	153175	18	66.67%	83.33%
1456	GSSPFG00020549001	>scaffold_23013_23354	GSSPFG00020549001-RA_1831-2958	99.00	-17.86	2 22	705730	23	52.17%	82.61%
1457	GSSPFG00013943001	>scaffold_23013_23354	GSSPFG00013943001-RA_4690-5154	101.00	-17.71	3 19	32 55	17	64.71%	88.24%
1458	GSSPFG00013943001	>scaffold_23013_23354	GSSPFG00013943001-RA_4690-5154	93.00	-18.19	2 21	328351	21	57.14%	76.19%
1459	GSSPFG00033522001	>scaffold_23013_23354	GSSPFG00033522001-RA_2973-4234	96.00	-22.43	2 19	753774	17	58.82%	82.35%
1460	GSSPFG00012063001	>scaffold_23013_23354	GSSPFG00012063001-RA_3737-4532	108.00	-18.50	2 22	278301	21	52.38%	76.19%
1461	GSSPFG00016295001	>scaffold_23013_23354	GSSPFG00016295001-RA_166818-168527	108.00	-18.78	2 22	737761	22	54.55%	86.36%
1462	GSSPFG00019890001	>scaffold_23013_23354	GSSPFG00019890001-RA_5070-5625	111.00	-17.02	3 19	251271	16	68.75%	87.50%
1463	GSSPFG00019890001	>scaffold_23013_23354	GSSPFG00019890001-RA_5070-5625	93.00	-19.40	3 20	318341	19	68.42%	78.95%
1464	GSSPFG00015169001	>scaffold_23013_23354	GSSPFG00015169001-RA_457-1290	99.00	-18.12	2 22	560581	20	65.00%	70.00%
1465	GSSPFG00014122001	>scaffold_23013_23354	GSSPFG00014122001-RA_32105-33438	104.00	-17.31	2 22	93117	22	59.09%	77.27%
1466	GSSPFG00023597001	>scaffold_23013_23354	GSSPFG00023597001-RA_37451-37536	116.00	-17.60	2 22	59 84	23	65.22%	69.57%
1467	GSSPFG00023597001	>scaffold_23013_23354	GSSPFG00023597001-RA_37451-37536	99.00	-17.51	4 22	21 45	20	60.00%	75.00%
1468	GSSPFG00028760001	>scaffold_23013_23354	GSSPFG00028760001-RA_1827-2716	100.00	-18.70	2 22	644668	22	54.55%	77.27%
1469	GSSPFG00030355001	>scaffold_23013_23354	GSSPFG00030355001-RA_57400-58613	114.00	-20.90	2 22	817837	20	60.00%	80.00%
1470	GSSPFG00013339001	>scaffold_23013_23354	GSSPFG00013339001-RA_3217-3776	104.00	-17.77	2 22	86111	23	52.17%	78.26%
1471	GSSPFG00002318001	>scaffold_23013_23354	GSSPFG00002318001-RA_9383-9591	101.00	-18.12	5 22	5 25	17	64.71%	88.24%
1472	GSSPFG00025377001	>scaffold_23013_23354	GSSPFG00025377001-RA_3438-4669	115.00	-18.17	2 22	414435	20	50.00%	75.00%
1473	GSSPFG00025377001	>scaffold_23013_23354	GSSPFG00025377001-RA_3438-4669	114.00	-17.42	2 22	10141036	21	66.67%	76.19%
1474	GSSPFG00025377001	>scaffold_23013_23354	GSSPFG00025377001-RA_3438-4669	93.00	-17.84	2 22	770792	20	55.00%	80.00%
1475	GSSPFG00008175001	>scaffold_23013_23354	GSSPFG00008175001-RA_206-916	121.00	-18.84	2 21	138163	22	54.55%	86.36%
1476	GSSPFG00008175001	>scaffold_23013_23354	GSSPFG00008175001-RA_206-916	100.00	-23.23	2 21	369392	20	65.00%	90.00%
1477	GSSPFG00008175001	>scaffold_23013_23354	GSSPFG00008175001-RA_206-916	93.00	-21.59	2 22	190211	21	66.67%	76.19%
1478	GSSPFG00025280001	>scaffold_23013_23354	GSSPFG00025280001-RA_2437-4002	126.00	-18.94	2 20	180204	20	60.00%	80.00%
1479	GSSPFG00025280001	>scaffold_23013_23354	GSSPFG00025280001-RA_2437-4002	124.00	-19.96	2 22	766791	23	52.17%	78.26%
1480	GSSPFG00025280001	>scaffold_23013_23354	GSSPFG00025280001-RA_2437-4002	113.00	-19.18	3 22	408430	19	57.89%	78.95%
1481	GSSPFG00025280001	>scaffold_23013_23354	GSSPFG00025280001-RA_2437-4002	107.00	-18.69	2 18	460481	16	62.50%	81.25%
1482	GSSPFG00025280001	>scaffold_23013_23354	GSSPFG00025280001-RA_2437-4002	105.00	-19.00	2 22	898918	20	60.00%	75.00%
1483	GSSPFG00025280001	>scaffold_23013_23354	GSSPFG00025280001-RA_2437-4002	91.00	-22.07	2 22	9941016	21	52.38%	80.95%
1484	GSSPFG00012262001	>scaffold_23013_23354	GSSPFG00012262001.3-RA_4921-5033	104.00	-17.24	2 22	74 97	21	47.62%	76.19%
1485	GSSPFG00021672001	>scaffold_23013_23354	GSSPFG00021672001-RA_2758-3118	106.00	-19.37	2 21	130151	19	57.89%	73.68%
1486	GSSPFG00021672001	>scaffold_23013_23354	GSSPFG00021672001-RA_2758-3118	106.00	-17.23	2 21	215239	21	57.14%	76.19%
1487	GSSPFG00034558001	>scaffold_23013_23354	GSSPFG00034558001.3-RA_1175-2086	136.00	-17.54	3 21	146168	18	55.56%	83.33%
1488	GSSPFG00034558001	>scaffold_23013_23354	GSSPFG00034558001.3-RA_1175-2086	124.00	-19.90	2 20	4 30	22	72.73%	72.73%
1489	GSSPFG00034558001	>scaffold_23013_23354	GSSPFG00034558001.3-RA_1175-2086	103.00	-17.11	5 21	496520	18	61.11%	83.33%
1490	GSSPFG00012943001	>scaffold_23013_23354	GSSPFG00012943001-RA_3666-4798	130.00	-18.43	2 15	277299	13	76.92%	92.31%
1491	GSSPFG00012943001	>scaffold_23013_23354	GSSPFG00012943001-RA_3666-4798	116.00	-17.81	2 22	670693	21	57.14%	80.95%
1492	GSSPFG00028489001	>scaffold_23013_23354	GSSPFG00028489001.5-RB_105216-105517	128.00	-17.48	2 17	72 94	15	73.33%	80.00%
1493	GSSPFG00028489001	>scaffold_23013_23354	GSSPFG00028489001.5-RA_115188-115572	100.00	-18.81	2 7	134156	5	100.00%	100.00%
1494	GSSPFG00028489001	>scaffold_23013_23354	GSSPFG00028489001.5-RA_115188-115572	95.00	-19.18	2 22	103124	20	55.00%	75.00%
1495	GSSPFG00028497001	>scaffold_23013_23354	GSSPFG00028497001-RA_179677-180753	109.00	-17.81	2 22	926948	20	50.00%	75.00%
1496	GSSPFG00028497001	>scaffold_23013_23354	GSSPFG00028497001-RA_179677-180753	101.00	-18.51	2 21	467490	21	61.90%	76.19%
1497	GSSPFG00028498001	>scaffold_23013_23354	GSSPFG00028498001-RA_187380-188475	105.00	-19.35	2 22	797819	20	50.00%	70.00%
1498	GSSPFG00030708001	>scaffold_23013_23354	GSSPFG00030708001-RA_2123-3842	118.00	-18.29	2 21	10261047	19	68.42%	78.95%
1499	GSSPFG00030708001	>scaffold_23013_23354	GSSPFG00030708001-RA_2123-3842	108.00	-18.89	2 21	20 40	19	63.16%	78.95%
1500	GSSPFG00030708001	>scaffold_23013_23354	GSSPFG00030708001-RA_2123-3842	104.00	-20.56	5 22	34 60	21	61.90%	76.19%
1501	GSSPFG00030708001	>scaffold_23013_23354	GSSPFG00030708001-RA_2123-3842	99.00	-19.96	2 21	322347	22	54.55%	77.27%
1502	GSSPFG00022202001	>scaffold_23013_23354	GSSPFG00022202001-RA_914-1759	120.00	-25.52	2 22	571596	23	56.52%	82.61%
1503	GSSPFG00022202001	>scaffold_23013_23354	GSSPFG00022202001-RA_914-1759	113.00	-18.22	4 22	92114	18	61.11%	83.33%
1504	GSSPFG00024476001	>scaffold_23013_23354	GSSPFG00024476001.2-RB_3794-4374	100.00	-17.88	2 22	99123	24	58.33%	70.83%
1505	GSSPFG00006600001	>scaffold_23013_23354	GSSPFG00006600001-RA_4598-5271	130.00	-18.89	3 16	24 47	14	64.29%	92.86%
1506	GSSPFG00006600001	>scaffold_23013_23354	GSSPFG00006600001-RA_4598-5271	109.00	-18.40	2 19	523547	19	52.63%	84.21%
1507	GSSPFG00006600001	>scaffold_23013_23354	GSSPFG00006600001-RA_4598-5271	100.00	-17.63	2 7	412434	5	100.00%	100.00%
1508	GSSPFG00033548001	>scaffold_23013_23354	GSSPFG00033548001-RA_4100-4689	123.00	-19.88	4 19	151171	15	80.00%	86.67%
1509	GSSPFG00000503001	>scaffold_23013_23354	GSSPFG00000503001-RA_181391-183158	127.00	-17.71	2 22	691712	20	55.00%	85.00%
1510	GSSPFG00000503001	>scaffold_23013_23354	GSSPFG00000503001-RA_181391-183158	125.00	-21.77	2 22	69 91	20	55.00%	75.00%
1511	GSSPFG00000503001	>scaffold_23013_23354	GSSPFG00000503001-RA_181391-183158	111.00	-17.51	2 16	11771200	15	73.33%	86.67%
1512	GSSPFG00000503001	>scaffold_23013_23354	GSSPFG00000503001-RA_181391-183158	96.00	-19.22	4 21	334356	17	52.94%	70.59%
1513	GSSPFG00000504001	>scaffold_23013_23354	GSSPFG00000504001-RA_188415-189452	123.00	-22.79	2 22	633655	21	71.43%	85.71%
1514	GSSPFG00000504001	>scaffold_23013_23354	GSSPFG00000504001-RA_188415-189452	104.00	-22.05	5 22	514538	19	68.42%	89.47%
1515	GSSPFG00000504001	>scaffold_23013_23354	GSSPFG00000504001-RA_188415-189452	101.00	-18.02	2 21	110139	26	61.54%	65.38%
1516	GSSPFG00000504001	>scaffold_23013_23354	GSSPFG00000504001-RA_188415-189452	97.00	-18.02	2 21	136165	26	57.69%	65.38%
1517	GSSPFG00000504001	>scaffold_23013_23354	GSSPFG00000504001-RA_188415-189452	92.00	-19.17	6 17	916938	11	81.82%	100.00%
1518	GSSPFG00000504001	>scaffold_23013_23354	GSSPFG00000504001-RA_188415-189452	90.00	-21.08	2 18	41 61	16	56.25%	81.25%
1519	GSSPFG00000504001	>scaffold_23013_23354	GSSPFG00000504001-RA_188415-189452	90.00	-20.59	2 22	84113	27	59.26%	66.67%
1520	GSSPFG00011751001	>scaffold_23013_23354	GSSPFG00011751001-RA_3814-4987	137.00	-25.33	2 22	100122	20	65.00%	80.00%
1521	GSSPFG00028312001	>scaffold_23013_23354	GSSPFG00028312001.5-RA_26377-26643	107.00	-17.96	2 22	243264	20	55.00%	75.00%
1522	GSSPFG00028312001	>scaffold_23013_23354	GSSPFG00028312001.5-RA_26377-26643	97.00	-18.31	4 22	6 28	18	72.22%	83.33%
1523	GSSPFG00005153001	>scaffold_23013_23354	GSSPFG00005153001.3-RA_638-3104	137.00	-17.71	3 21	56 76	18	72.22%	77.78%
1524	GSSPFG00005153001	>scaffold_23013_23354	GSSPFG00005153001.3-RA_638-3104	129.00	-18.03	2 10	768790	8	87.50%	100.00%
1525	GSSPFG00030132001	>scaffold_23013_23354	GSSPFG00030132001-RA_1941-2186	127.00	-17.69	2 22	17 38	20	65.00%	75.00%
1526	GSSPFG00009060001	>scaffold_23013_23354	GSSPFG00009060001-RA_5208-5368	124.00	-18.63	2 22	138161	21	52.38%	80.95%
1527	GSSPFG00009060001	>scaffold_23013_23354	GSSPFG00009060001-RA_5208-5368	110.00	-18.61	3 21	13 34	18	66.67%	77.78%
1528	GSSPFG00030509001	>scaffold_23013_23354	GSSPFG00030509001-RA_2488-3272	105.00	-18.07	3 22	633655	19	57.89%	68.42%
1529	GSSPFG00030509001	>scaffold_23013_23354	GSSPFG00030509001-RA_2488-3272	96.00	-17.39	2 22	674698	22	54.55%	72.73%
1530	GSSPFG00011331001	>scaffold_23013_23354	GSSPFG00011331001-RA_1584-1806	121.00	-19.49	4 22	78100	18	72.22%	83.33%
1531	GSSPFG00000127001	>scaffold_23013_23354	GSSPFG00000127001-RA_27237-28340	114.00	-17.04	3 19	473495	16	56.25%	93.75%
1532	GSSPFG00000134001	>scaffold_23013_23354	GSSPFG00000134001-RA_98121-99328	90.00	-17.52	2 22	849869	20	50.00%	75.00%
1533	GSSPFG00000141001	>scaffold_23013_23354	GSSPFG00000141001-RA_179710-180538	113.00	-22.10	2 22	367389	20	50.00%	80.00%
1534	GSSPFG00000141001	>scaffold_23013_23354	GSSPFG00000141001-RA_179710-180538	108.00	-17.25	3 21	244266	18	50.00%	83.33%
1535	GSSPFG00000141001	>scaffold_23013_23354	GSSPFG00000141001-RA_179710-180538	97.00	-21.87	2 22	206228	20	50.00%	75.00%
1536	GSSPFG00000141001	>scaffold_23013_23354	GSSPFG00000141001-RA_179710-180538	97.00	-20.74	3 18	268290	15	53.33%	93.33%
1537	GSSPFG00000141001	>scaffold_23013_23354	GSSPFG00000141001-RA_179710-180538	92.00	-20.51	3 21	655677	18	55.56%	72.22%
1538	GSSPFG00026710001	>scaffold_23013_23354	GSSPFG00026710001-RA_1765-2388	125.00	-17.69	2 22	496518	20	50.00%	80.00%
1539	GSSPFG00021319001	>scaffold_23013_23354	GSSPFG00021319001-RA_2166-2780	111.00	-18.82	2 20	180202	18	55.56%	77.78%
1540	GSSPFG00021319001	>scaffold_23013_23354	GSSPFG00021319001-RA_2166-2780	105.00	-17.71	2 22	28 50	20	65.00%	70.00%
1541	GSSPFG00032551001	>scaffold_23013_23354	GSSPFG00032551001-RA_2491-3588	125.00	-18.28	2 21	133153	19	57.89%	84.21%
1542	GSSPFG00028680001	>scaffold_23013_23354	GSSPFG00028680001-RA_1350-1897	131.00	-20.50	2 19	241263	18	77.78%	83.33%
1543	GSSPFG00022240001	>scaffold_23013_23354	GSSPFG00022240001-RA_2438-3068	132.00	-20.08	2 22	231255	22	54.55%	72.73%
1544	GSSPFG00023770001	>scaffold_23013_23354	GSSPFG00023770001-RA_3420-4543	150.00	-22.73	2 20	1 20	19	63.16%	78.95%
1545	GSSPFG00013695001	>scaffold_23013_23354	GSSPFG00013695001-RA_25110-26158	131.00	-18.87	2 22	422443	20	60.00%	85.00%
1546	GSSPFG00013695001	>scaffold_23013_23354	GSSPFG00013695001-RA_25110-26158	120.00	-17.52	2 22	217240	21	66.67%	76.19%
1547	GSSPFG00013695001	>scaffold_23013_23354	GSSPFG00013695001-RA_25110-26158	106.00	-18.04	2 22	19 41	21	52.38%	80.95%
1548	GSSPFG00013695001	>scaffold_23013_23354	GSSPFG00013695001-RA_25110-26158	105.00	-17.63	3 22	963985	19	52.63%	73.68%
1549	GSSPFG00013695001	>scaffold_23013_23354	GSSPFG00013695001-RA_25110-26158	97.00	-17.34	5 22	141163	17	52.94%	76.47%
1550	GSSPFG00008488001	>scaffold_23013_23354	GSSPFG00008488001.3-RA_403-1649	134.00	-17.40	2 21	780801	19	73.68%	78.95%
1551	GSSPFG00000748001	>scaffold_23013_23354	GSSPFG00000748001-RA_197-816	104.00	-18.11	3 22	189212	20	60.00%	70.00%
1552	GSSPFG00000748001	>scaffold_23013_23354	GSSPFG00000748001-RA_197-816	90.00	-19.35	2 21	203227	21	61.90%	66.67%
1553	GSSPFG00019440001	>scaffold_23013_23354	GSSPFG00019440001-RA_1709-3317	148.00	-23.00	3 22	911934	20	75.00%	80.00%
1554	GSSPFG00019440001	>scaffold_23013_23354	GSSPFG00019440001-RA_1709-3317	101.00	-20.10	2 22	13491371	20	55.00%	75.00%
1555	GSSPFG00019440001	>scaffold_23013_23354	GSSPFG00019440001-RA_1709-3317	98.00	-17.02	2 11	14121434	9	66.67%	88.89%
1556	GSSPFG00026193001	>scaffold_23013_23354	GSSPFG00026193001.3-RA_43041-44332	121.00	-19.14	3 19	27 50	17	58.82%	88.24%
1557	GSSPFG00026193001	>scaffold_23013_23354	GSSPFG00026193001.3-RA_43041-44332	100.00	-17.60	4 19	862883	15	60.00%	86.67%
1558	GSSPFG00026193001	>scaffold_23013_23354	GSSPFG00026193001.3-RA_43041-44332	90.00	-20.81	4 21	313335	18	66.67%	83.33%
1559	GSSPFG00018195001	>scaffold_23013_23354	GSSPFG00018195001-RA_2040-3298	122.00	-18.48	3 20	217244	22	63.64%	72.73%
1560	GSSPFG00018195001	>scaffold_23013_23354	GSSPFG00018195001-RA_2040-3298	98.00	-17.49	2 22	385405	20	60.00%	75.00%
1561	GSSPFG00017650001	>scaffold_23013_23354	GSSPFG00017650001-RA_1025-1545	111.00	-17.82	4 22	213238	21	71.43%	76.19%
1562	GSSPFG00017650001	>scaffold_23013_23354	GSSPFG00017650001-RA_1025-1545	90.00	-20.12	3 19	381404	17	70.59%	88.24%
1563	GSSPFG00028417001	>scaffold_23013_23354	GSSPFG00028417001-RA_10529-10978	107.00	-19.01	2 21	216239	20	70.00%	75.00%
1564	GSSPFG00028417001	>scaffold_23013_23354	GSSPFG00028417001-RA_10529-10978	91.00	-19.03	6 20	279301	14	78.57%	78.57%
1565	GSSPFG00002840001	>scaffold_23013_23354	GSSPFG00002840001-RA_1787-3052	144.00	-22.13	2 22	714738	22	63.64%	77.27%
1566	GSSPFG00002840001	>scaffold_23013_23354	GSSPFG00002840001-RA_1787-3052	128.00	-17.48	2 17	905927	15	73.33%	80.00%
1567	GSSPFG00002840001	>scaffold_23013_23354	GSSPFG00002840001-RA_1787-3052	116.00	-18.15	4 22	624649	21	57.14%	76.19%
1568	GSSPFG00002840001	>scaffold_23013_23354	GSSPFG00002840001-RA_1787-3052	107.00	-21.32	2 21	264291	24	54.17%	70.83%
1569	GSSPFG00022442001	>scaffold_23013_23354	GSSPFG00022442001.3-RA_3589-4467	115.00	-21.23	2 22	125150	23	60.87%	78.26%
1570	GSSPFG00022442001	>scaffold_23013_23354	GSSPFG00022442001.3-RA_3589-4467	91.00	-17.32	4 20	145167	16	62.50%	75.00%
1571	GSSPFG00011096001	>scaffold_23013_23354	GSSPFG00011096001-RA_2185-3570	98.00	-17.40	2 21	385407	20	70.00%	75.00%
1572	GSSPFG00011096001	>scaffold_23013_23354	GSSPFG00011096001-RA_2185-3570	98.00	-17.23	2 21	581602	19	57.89%	78.95%
1573	GSSPFG00011096001	>scaffold_23013_23354	GSSPFG00011096001-RA_2185-3570	94.00	-20.98	3 19	335357	16	68.75%	87.50%
1574	GSSPFG00010965001	>scaffold_23013_23354	GSSPFG00010965001-RA_190-1287	119.00	-21.55	2 22	378403	23	60.87%	82.61%
1575	GSSPFG00010965001	>scaffold_23013_23354	GSSPFG00010965001-RA_190-1287	100.00	-20.72	3 22	9931012	19	63.16%	73.68%
1576	GSSPFG00010965001	>scaffold_23013_23354	GSSPFG00010965001-RA_190-1287	90.00	-17.87	2 18	446466	16	56.25%	81.25%
1577	GSSPFG00030116001	>scaffold_23013_23354	GSSPFG00030116001-RA_764-1809	138.00	-19.82	2 22	890912	21	61.90%	80.95%
1578	GSSPFG00030116001	>scaffold_23013_23354	GSSPFG00030116001-RA_764-1809	128.00	-20.41	2 22	920943	21	61.90%	76.19%
1579	GSSPFG00029403001	>scaffold_23013_23354	GSSPFG00029403001-RA_2382-2552	120.00	-20.19	2 22	98121	21	57.14%	85.71%
1580	GSSPFG00012456001	>scaffold_23013_23354	GSSPFG00012456001-RA_1935-3053	111.00	-18.88	2 16	155177	14	71.43%	78.57%
1581	GSSPFG00012456001	>scaffold_23013_23354	GSSPFG00012456001-RA_1935-3053	111.00	-19.45	2 20	418438	18	66.67%	83.33%
1582	GSSPFG00012456001	>scaffold_23013_23354	GSSPFG00012456001-RA_1935-3053	105.00	-18.22	2 18	53 75	16	56.25%	75.00%
1583	GSSPFG00012456001	>scaffold_23013_23354	GSSPFG00012456001-RA_1935-3053	101.00	-23.71	3 20	481503	18	72.22%	88.89%
1584	GSSPFG00012456001	>scaffold_23013_23354	GSSPFG00012456001-RA_1935-3053	93.00	-24.60	6 22	798817	16	81.25%	81.25%
1585	GSSPFG00012456001	>scaffold_23013_23354	GSSPFG00012456001-RA_1935-3053	91.00	-18.72	3 21	189212	19	52.63%	78.95%
1586	GSSPFG00028016001	>scaffold_23013_23354	GSSPFG00028016001-RA_4709-4852	115.00	-19.57	2 22	36 60	22	63.64%	77.27%
1587	GSSPFG00020795001	>scaffold_23013_23354	GSSPFG00020795001-RA_120-209	97.00	-24.60	6 20	1 18	14	85.71%	92.86%
1588	GSSPFG00017188001	>scaffold_23013_23354	GSSPFG00017188001-RA_49097-49820	123.00	-19.81	2 22	580601	20	60.00%	75.00%
1589	GSSPFG00008062001	>scaffold_23013_23354	GSSPFG00008062001-RA_233-1530	124.00	-19.04	2 21	71 92	20	65.00%	80.00%
1590	GSSPFG00008062001	>scaffold_23013_23354	GSSPFG00008062001-RA_233-1530	118.00	-19.93	2 21	582603	19	63.16%	84.21%
1591	GSSPFG00008062001	>scaffold_23013_23354	GSSPFG00008062001-RA_233-1530	111.00	-17.97	2 20	791813	18	50.00%	100.00%
1592	GSSPFG00008062001	>scaffold_23013_23354	GSSPFG00008062001-RA_233-1530	97.00	-20.38	6 22	521543	16	68.75%	87.50%
1593	GSSPFG00031993001	>scaffold_23013_23354	GSSPFG00031993001-RA_2800-3677	134.00	-20.80	2 21	102123	19	68.42%	84.21%
1594	GSSPFG00031993001	>scaffold_23013_23354	GSSPFG00031993001-RA_2800-3677	133.00	-23.11	2 19	494517	18	72.22%	83.33%
1595	GSSPFG00031993001	>scaffold_23013_23354	GSSPFG00031993001-RA_2800-3677	119.00	-23.62	2 22	658684	24	62.50%	79.17%
1596	GSSPFG00031993001	>scaffold_23013_23354	GSSPFG00031993001-RA_2800-3677	95.00	-20.65	3 22	450469	20	65.00%	75.00%
1597	GSSPFG00031993001	>scaffold_23013_23354	GSSPFG00031993001-RA_2800-3677	92.00	-17.53	3 21	722744	18	55.56%	72.22%
1598	GSSPFG00002209001	>scaffold_23013_23354	GSSPFG00002209001-RA_930-1726	139.00	-20.56	2 21	317342	22	63.64%	72.73%
1599	GSSPFG00002209001	>scaffold_23013_23354	GSSPFG00002209001-RA_930-1726	120.00	-17.13	2 22	489514	23	65.22%	73.91%
1600	GSSPFG00030016001	>scaffold_23013_23354	GSSPFG00030016001-RA_26460-26846	126.00	-21.05	2 22	288308	20	60.00%	80.00%
1601	GSSPFG00030016001	>scaffold_23013_23354	GSSPFG00030016001-RA_26460-26846	109.00	-20.15	2 19	124147	18	61.11%	77.78%
1602	GSSPFG00030016001	>scaffold_23013_23354	GSSPFG00030016001-RA_26460-26846	105.00	-19.91	3 20	95116	17	64.71%	76.47%
1603	GSSPFG00009045001	>scaffold_23013_23354	GSSPFG00009045001-RA_674-1079	116.00	-17.10	4 17	308330	13	69.23%	84.62%
1604	GSSPFG00019443001	>scaffold_23013_23354	GSSPFG00019443001-RA_15301-15386	131.00	-20.08	3 22	25 50	22	59.09%	77.27%
1605	GSSPFG00019445001	>scaffold_23013_23354	GSSPFG00019445001-RA_31016-31125	124.00	-25.98	2 22	44 67	21	57.14%	76.19%
1606	GSSPFG00034371001	>scaffold_23013_23354	GSSPFG00034371001-RA_20251-21258	114.00	-19.08	2 20	431454	19	63.16%	78.95%
1607	GSSPFG00034372001	>scaffold_23013_23354	GSSPFG00034372001-RA_26396-26765	137.00	-17.70	3 16	143164	13	84.62%	92.31%
1608	GSSPFG00034372001	>scaffold_23013_23354	GSSPFG00034372001-RA_26396-26765	106.00	-17.32	2 22	108128	20	55.00%	75.00%
1609	GSSPFG00034374001	>scaffold_23013_23354	GSSPFG00034374001-RA_41793-45620	99.00	-17.63	2 22	26 52	24	50.00%	70.83%
1610	GSSPFG00023932001	>scaffold_23013_23354	GSSPFG00023932001-RA_3922-5003	151.00	-19.08	2 17	10201043	16	75.00%	81.25%
1611	GSSPFG00023932001	>scaffold_23013_23354	GSSPFG00023932001-RA_3922-5003	122.00	-23.02	3 19	9821004	16	56.25%	87.50%
1612	GSSPFG00023932001	>scaffold_23013_23354	GSSPFG00023932001-RA_3922-5003	109.00	-19.63	2 22	90112	20	65.00%	75.00%
1613	GSSPFG00023932001	>scaffold_23013_23354	GSSPFG00023932001-RA_3922-5003	103.00	-19.73	5 22	424445	17	70.59%	94.12%
1614	GSSPFG00023932001	>scaffold_23013_23354	GSSPFG00023932001-RA_3922-5003	97.00	-22.09	2 19	973992	17	58.82%	76.47%
1615	GSSPFG00023932001	>scaffold_23013_23354	GSSPFG00023932001-RA_3922-5003	94.00	-17.28	3 21	959983	20	55.00%	85.00%
1616	GSSPFG00031580001	>scaffold_23013_23354	GSSPFG00031580001-RA_48067-48480	101.00	-18.80	2 22	50 72	22	63.64%	72.73%
1617	GSSPFG00017290001	>scaffold_23013_23354	GSSPFG00017290001.2-RB_1303-1747	123.00	-21.52	4 22	277302	21	71.43%	76.19%
1618	GSSPFG00017290001	>scaffold_23013_23354	GSSPFG00017290001.2-RB_1303-1747	103.00	-18.04	2 17	335359	17	64.71%	70.59%
1619	GSSPFG00017290001	>scaffold_23013_23354	GSSPFG00017290001.2-RB_1303-1747	99.00	-19.36	2 21	133157	21	66.67%	66.67%
1620	GSSPFG00017290001	>scaffold_23013_23354	GSSPFG00017290001.2-RC_1754-4087	124.00	-18.21	3 21	488510	18	72.22%	83.33%
1621	GSSPFG00017290001	>scaffold_23013_23354	GSSPFG00017290001.2-RC_1754-4087	114.00	-17.01	2 21	299323	21	66.67%	76.19%
1622	GSSPFG00017290001	>scaffold_23013_23354	GSSPFG00017290001.2-RC_1754-4087	114.00	-20.79	2 21	375399	21	66.67%	76.19%
1623	GSSPFG00017290001	>scaffold_23013_23354	GSSPFG00017290001.2-RC_1754-4087	112.00	-20.92	2 21	454476	19	73.68%	73.68%
1624	GSSPFG00017290001	>scaffold_23013_23354	GSSPFG00017290001.2-RC_1754-4087	110.00	-19.95	3 22	102127	22	63.64%	81.82%
1625	GSSPFG00010440001	>scaffold_23013_23354	GSSPFG00010440001-RA_1403-2828	129.00	-22.20	3 22	145167	19	68.42%	89.47%
1626	GSSPFG00005566001	>scaffold_23013_23354	GSSPFG00005566001-RA_17312-18331	118.00	-18.34	3 21	449470	18	66.67%	88.89%
1627	GSSPFG00005566001	>scaffold_23013_23354	GSSPFG00005566001-RA_17312-18331	111.00	-20.15	3 17	417440	15	73.33%	86.67%
1628	GSSPFG00005566001	>scaffold_23013_23354	GSSPFG00005566001-RA_17312-18331	98.00	-18.55	4 22	32 52	18	72.22%	77.78%
1629	GSSPFG00005567001	>scaffold_23013_23354	GSSPFG00005567001.3-RA_17104-18451	123.00	-20.08	3 22	579603	21	61.90%	80.95%
1630	GSSPFG00005567001	>scaffold_23013_23354	GSSPFG00005567001.3-RA_17104-18451	119.00	-20.35	2 20	55 77	18	61.11%	83.33%
1631	GSSPFG00005567001	>scaffold_23013_23354	GSSPFG00005567001.3-RA_17104-18451	119.00	-20.35	2 20	73 95	18	61.11%	83.33%
1632	GSSPFG00005567001	>scaffold_23013_23354	GSSPFG00005567001.3-RA_17104-18451	116.00	-21.78	2 22	35 59	22	59.09%	77.27%
1633	GSSPFG00005567001	>scaffold_23013_23354	GSSPFG00005567001.3-RA_17104-18451	112.00	-20.42	2 22	11741197	21	52.38%	80.95%
1634	GSSPFG00005567001	>scaffold_23013_23354	GSSPFG00005567001.3-RA_17104-18451	97.00	-20.82	4 22	952974	18	61.11%	77.78%
1635	GSSPFG00005568001	>scaffold_23013_23354	GSSPFG00005568001-RA_43353-44470	119.00	-18.63	2 21	845868	20	65.00%	80.00%
1636	GSSPFG00005568001	>scaffold_23013_23354	GSSPFG00005568001-RA_43353-44470	116.00	-18.36	2 22	7 32	23	56.52%	73.91%
1637	GSSPFG00005568001	>scaffold_23013_23354	GSSPFG00005568001-RA_43353-44470	115.00	-17.09	3 19	695717	17	64.71%	82.35%
1638	GSSPFG00005568001	>scaffold_23013_23354	GSSPFG00005568001-RA_43353-44470	114.00	-20.09	2 21	862887	22	59.09%	81.82%
1639	GSSPFG00005568001	>scaffold_23013_23354	GSSPFG00005568001-RA_43353-44470	107.00	-20.27	4 22	416437	18	61.11%	83.33%
1640	GSSPFG00005568001	>scaffold_23013_23354	GSSPFG00005568001-RA_43353-44470	107.00	-17.10	3 21	717740	19	57.89%	78.95%
1641	GSSPFG00005568001	>scaffold_23013_23354	GSSPFG00005568001-RA_43353-44470	103.00	-17.22	3 21	10771100	19	68.42%	78.95%
1642	GSSPFG00005568001	>scaffold_23013_23354	GSSPFG00005568001-RA_43353-44470	99.00	-20.65	2 22	792813	20	40.00%	95.00%
1643	GSSPFG00005568001	>scaffold_23013_23354	GSSPFG00005568001-RA_43353-44470	97.00	-17.14	2 18	550573	17	52.94%	76.47%
1644	GSSPFG00005568001	>scaffold_23013_23354	GSSPFG00005568001-RA_43353-44470	95.00	-21.19	2 22	346371	23	56.52%	82.61%
1645	GSSPFG00005572001	>scaffold_23013_23354	GSSPFG00005572001-RA_57304-57786	132.00	-23.74	2 22	250276	24	70.83%	75.00%
1646	GSSPFG00028221001	>scaffold_23013_23354	GSSPFG00028221001.3-RA_2639-2857	135.00	-19.44	2 22	8 29	20	65.00%	85.00%
1647	GSSPFG00031084001	>scaffold_23013_23354	GSSPFG00031084001-RA_2245-2470	104.00	-17.72	2 8	16 38	6	83.33%	100.00%
1648	GSSPFG00004392001	>scaffold_23013_23354	GSSPFG00004392001-RA_706-1250	130.00	-21.66	2 22	364384	20	60.00%	85.00%
1649	GSSPFG00026307001	>scaffold_23013_23354	GSSPFG00026307001-RA_31717-32385	123.00	-17.94	4 22	307331	20	70.00%	80.00%
1650	GSSPFG00014853001	>scaffold_23013_23354	GSSPFG00014853001-RA_3368-4583	127.00	-22.16	2 18	143164	16	68.75%	87.50%
1651	GSSPFG00014853001	>scaffold_23013_23354	GSSPFG00014853001-RA_3368-4583	122.00	-17.17	2 22	81105	23	56.52%	78.26%
1652	GSSPFG00014853001	>scaffold_23013_23354	GSSPFG00014853001-RA_3368-4583	120.00	-19.76	2 22	692717	23	52.17%	73.91%
1653	GSSPFG00014853001	>scaffold_23013_23354	GSSPFG00014853001-RA_3368-4583	120.00	-17.34	2 16	11031123	14	71.43%	85.71%
1654	GSSPFG00014853001	>scaffold_23013_23354	GSSPFG00014853001-RA_3368-4583	105.00	-24.35	2 21	828849	20	65.00%	75.00%
1655	GSSPFG00014853001	>scaffold_23013_23354	GSSPFG00014853001-RA_3368-4583	104.00	-17.98	3 22	765788	20	55.00%	75.00%
1656	GSSPFG00014853001	>scaffold_23013_23354	GSSPFG00014853001-RA_3368-4583	97.00	-17.96	2 22	971993	20	50.00%	90.00%
[truncated: 12,633 more rows]

## Sheet: Rna22
miR34
[truncated: 3,018 more rows]

## Sheet: miRmap
miR34 intra
[truncated: 84 more rows]
