# Supplementary material for: Characterization and expression profiling of microRNAs in response to plant feeding in two host-plant strains of the lepidopteran pest Spodoptera frugiperda
Source: BMC Genomics. 2018 Nov 6;19:804. doi: 10.1186/s12864-018-5119-6 (PMC6219076; doi:10.1186/s12864-018-5119-6)
Supplement: Supplementary file 10 — Excel file S5. Target genes of known miRs and their relative expression in SfC on rice compared to corn. (XLSX 35 kb) [file 12864_2018_5119_MOESM10_ESM.xlsx]

## Sheet: miR-34
number	target by TargetScan	target by Miranda	target by RNA22	target by miRmap	log2FoldChange (target gene)	Annotation from SfruDB
1	GSSPFG00021718001-RA	0	1	1	-4.22	PREDICTED: protein takeout-like [Bombyx mori]
2	GSSPFG00022312001-RA	0	1	1	-3.52	NH
3	GSSPFG00000212001-RA	1	1	1	-3.27	PREDICTED: flocculation protein FLO11-like [Bombyx mori]
4	GSSPFG00000626001-RA	1	0	1	-3.24	cuticular protein hypothetical 1 precursor [Bombyx mori
5	GSSPFG00020579001-RA	1	1	1	-3.13	NH
6	GSSPFG00004130001-RA	1	0	1	-2.25	PREDICTED: uncharacterized protein LOC105384144 [Plutella xylostella]
7	GSSPFG00027010001-RA	1	0	1	-2.14	PREDICTED: 26S proteasome complex subunit DSS1 [Plutella xylostella]
8	GSSPFG00005814001-RA	1	1	ND	-1.99	PREDICTED: protein sprint-like [Bombyx mori]
9	GSSPFG00005814001-RA	1	1	ND	-1.99	PREDICTED: protein sprint-like [Bombyx mori]
10	GSSPFG00006030001-RA	1	1	ND	-1.96	TPA: laccase-like multicopper oxidase 2 isoform B [Bombyx mori]
11	GSSPFG00027443001-RA	1	0	ND	-1.81	uncharacterized protein LOC100327241 [Bombyx mori
12	GSSPFG00001944001-RA	1	1	ND	-1.75	unknown unsecreted protein [Papilio xuthus]
13	GSSPFG00013845001-RA	1	1	ND	-1.6	larval cuticle protein LCP-17 precursor [Bombyx mori
14	GSSPFG00028951001-RA	1	1	ND	-1.57	unknown unsecreted protein [Papilio xuthus]
15	GSSPFG00031524001-RA	1	0	ND	-1.54	PREDICTED: laminin subunit beta-1 [Bombyx mori]
16	GSSPFG00001611001.2-RA	1	0	ND	-1.36	REPAT18 [Spodoptera exigua]
17	GSSPFG00007081001-RA	1	0	ND	-1.36	zinc/iron regulated transporter-related protein 3 [Papilio polytes]
18	GSSPFG00014840001-RA	0	0	ND	-1.33	unknown secreted protein [Papilio xuthus]
19	GSSPFG00028350001-RA	1	0	ND	-1.29	PREDICTED: uncharacterized protein LOC105381874 [Plutella xylostella]
20	GSSPFG00010240001.3-RA	1	1	ND	-1.27	immulectin-3 [Ostrinia furnacalis]
21	GSSPFG00032940001-RA	1	1	ND	-1.23	NH
22	GSSPFG00010502001-RA	1	1	ND	-1.21	TPA: putative cuticle protein [Bombyx mori]
23	GSSPFG00016641001.3-RA	0	1	ND	-1.16	PREDICTED: homeobox protein Mohawk-like [Bombyx mori]
24	GSSPFG00033837001-RA	0	0	ND	-1	PREDICTED: hydroxysteroid dehydrogenase-like protein 2 isoform X2 [Plutella xylostella]
25	GSSPFG00030100001-RA	0	0	ND	-0.93	similar to CG6040 [Papilio polytes]
26	GSSPFG00031627001-RA	1	0	ND	-0.85	PREDICTED: sushi, von Willebrand factor type A, EGF and pentraxin domain-containing protein 1 isoform X1 [Plutella xylostella]
27	GSSPFG00024173001-RA	1	0	ND	-0.8	NH
28	GSSPFG00012238001-RA	1	1	ND	-0.72	PREDICTED: basement membrane-specific heparan sulfate proteoglycan core protein-like [Bombyx mori]
29	GSSPFG00011364001-RA	1	1	ND	0.85	hypothetical protein KGM_03426 [Danaus plexippus]
30	GSSPFG00027301001-RA	1	1	ND	0.92	PREDICTED: PI-PLC X domain-containing protein 1-like, partial [Plutella xylostella]
31	GSSPFG00025987001.2-RA	1	1	ND	1.16	PREDICTED: integrin alpha-PS2-like [Acyrthosiphon pisum]
32	GSSPFG00023510001-RA	1	1	ND	1.19	PREDICTED: GMP synthase [glutamine-hydrolyzing
33	GSSPFG00007353001-RA	1	1	ND	1.22	PREDICTED: sterile alpha and TIR motif-containing protein 1 isoform X1 [Megachile rotundata
34	GSSPFG00034000001-RA	1	1	ND	1.29	Fasciclin-1 [Cerapachys biroi]
35	GSSPFG00016234001-RA	1	1	ND	1.46	PREDICTED: neurogenic locus notch homolog protein 4-like [Plutella xylostella]
36	GSSPFG00026820001-RA	1	1	ND	1.86	cuticular protein hypothetical 15 precursor [Bombyx mori
37	GSSPFG00023339001-RA	1	0	1	2.11	PREDICTED: organic cation transporter protein [Apis mellifera]
38	GSSPFG00034472001-RA	1	1	1	2.18	PREDICTED: uncharacterized protein LOC101741030 [Bombyx mori]
	total	32	24	9
	%	84.2105	63.1579	100

## Sheet: miR-190
number	target by Targetscan	target by Miranda	target by RNA22	target by miRmap	log2FoldChange (target gene)	Annotation from SfruDB
1	GSSPFG00006314001	0	0	1	-6.54	acyl-CoA desaturase HvirIPAE [Heliothis virescens]
2	GSSPFG00008788001	1	0	1	-4.94	unknown secreted protein [Papilio xuthus]
3	GSSPFG00012033001	0	0	1	-4.71	osiris 9A [Papilio polytes]
4	GSSPFG00021718001	0	0	1	-4.22	PREDICTED: protein takeout-like [Bombyx mori]
5	GSSPFG00004305001	0	0	1	-4.04	PREDICTED: formin-J-like [Plutella xylostella]
6	GSSPFG00004305001	0	0	1	-4.04	PREDICTED: formin-J-like [Plutella xylostella]
7	GSSPFG00019160001	0	0	1	-3.69	apyrase [Danaus plexippus]
8	GSSPFG00002257001	0	1	1	-3.58	hypothetical protein KGM_17610 [Danaus plexippus]
9	GSSPFG00005155001	0	0	1	-3.54	cuticular protein glycine-rich 20 precursor [Bombyx mori
10	GSSPFG00003776001	1	0	ND	-3.42	PREDICTED: mucin-4-like [Plutella xylostella]
11	GSSPFG00002258001	0	0	ND	-2.06	unknown secreted protein [Papilio xuthus]
12	GSSPFG00029284001	0	0	ND	-1.99	PREDICTED: somatomedin-B and thrombospondin type-1 domain-containing protein-like [Bombyx mori
13	GSSPFG00001944001	0	0	ND	-1.75	unknown unsecreted protein [Papilio xuthus]
14	GSSPFG00002117001	0	1	ND	-1.73	PREDICTED: uncharacterized protein LOC101740597 isoform X1 [Bombyx mori]
15	GSSPFG00028951001	0	0	ND	-1.57	unknown unsecreted protein [Papilio xuthus]
16	GSSPFG00013202001	0	1	ND	-1.56	PREDICTED: facilitated trehalose transporter Tret1-like isoform X2 [Bombyx mori]
17	GSSPFG00022364001	0	0	ND	-1.51	TRAF3 [Bombyx mori
18	GSSPFG00009584001	0	0	ND	-1.38	cuticular protein analogous to peritrophins 1-D [Danaus plexippus]
19	GSSPFG00020928001	0	0	ND	-1.34	PREDICTED: uncharacterized threonine-rich GPI-anchored glycoprotein PJ4664.02 [Bombyx mori]
20	GSSPFG00015675001	0	0	ND	-1.33	peptidyl-prolyl cis-trans isomerase [Bombyx mori
21	GSSPFG00010240001	0	0	ND	-1.27	C-type lectin 10 precursor [Bombyx mori
22	GSSPFG00015264001	0	0	ND	-1.17	PREDICTED: elongation factor G, mitochondrial [Ceratitis capitata]
23	GSSPFG00035050001	0	0	ND	-1.04	PREDICTED: hepatic leukemia factor-like isoform X1 [Bombyx mori]
24	GSSPFG00030409001	1	0	ND	-0.99	PREDICTED: uncharacterized protein LOC101739711 [Bombyx mori]
25	GSSPFG00031635001	0	0	ND	-0.99	PREDICTED: E3 ubiquitin-protein ligase ZNRF2-like [Bombyx mori]
26	GSSPFG00006843001	0	0	ND	-0.7	PREDICTED: lipoyltransferase 1, mitochondrial-like isoform X1 [Bombyx mori
27	GSSPFG00015651001	1	0	ND	0.71	PREDICTED: uncharacterized protein LOC101735549 isoform X3 [Bombyx mori]
28	GSSPFG00030094001	0	0	ND	0.78	carboxypeptidase [Danaus plexippus]
29	GSSPFG00017691001	1	0	ND	0.8	PREDICTED: putative glutamate synthase [NADPH
30	GSSPFG00031518001	0	0	ND	0.87	PREDICTED: branched-chain-amino-acid aminotransferase, cytosolic [Plutella xylostella]
31	GSSPFG00032177001	0	1	ND	0.89	PREDICTED: filamin-A isoform X3 [Megachile rotundata]
32	GSSPFG00032177001	0	1	ND	0.9	PREDICTED: filamin-A isoform X3 [Megachile rotundata]
33	GSSPFG00035219001	0	0	ND	0.94	NH
34	GSSPFG00031998001	0	0	ND	1.16	PREDICTED: organic cation transporter protein-like [Bombyx mori]
35	GSSPFG00003755001	0	0	ND	1.21	chlorophyllide A binding protein precursor [Bombyx mori
36	GSSPFG00010728001	0	0	ND	1.26	NH
37	GSSPFG00012309001	0	0	ND	1.26	PREDICTED: cysteine dioxygenase type 1-like [Bombyx mori]
38	GSSPFG00023936001	0	0	ND	1.28	PREDICTED: alpha,alpha-trehalose-phosphate synthase [UDP-forming
39	GSSPFG00028295001	0	1	ND	1.31	PREDICTED: uncharacterized protein LOC105384323 [Plutella xylostella]
40	GSSPFG00010982001	0	0	ND	1.36	putative amine oxidase [Danaus plexippus]
41	GSSPFG00017613001	1	1	ND	1.42	NH
42	GSSPFG00027683001	0	0	ND	1.72	uricase [Bombyx mori
43	GSSPFG00018644001	0	0	ND	1.92	obstructor-E, partial [Papilio xuthus]
44	GSSPFG00025576001	0	0	ND	2.3	PREDICTED: inducible metalloproteinase inhibitor protein-like isoform X2 [Bombyx mori]
45	GSSPFG00033685001	0	0	1	3.51	NH
46	GSSPFG00011317001	0	0	1	4.32	putative ecdysone oxidase [Helicoverpa zea]
	total	6	7	11
	%	13.0435	15.2174	100

## Sheet: miR-1a-5p
number	target by TargetScan	target by Miranda	target by RNA22	target by miRmap	log2FoldChange (target gene)	Annotation from SfruDB
1	GSSPFG00014426001	0	0	1	-3.38026	PREDICTED: serine proteinase stubble-like, partial [Plutella xylostella]	0.0
2	GSSPFG00005411001	0	0	1	-3.20206	PREDICTED: stress response protein NST1-like [Plutella xylostella]	3e-110
3	GSSPFG00035318001	0	0	1	-2.29569	ATP-binding cassette sub-family C member 4 [Trichoplusia ni]	2e-108
4	GSSPFG00023869001	0	0	1	-2.22863	PREDICTED: gamma-interferon-inducible lysosomal thiol reductase-like [Bombyx mori]	1e-60
5	GSSPFG00030835001	0	0	ND	-1.91207	hypothetical protein KGM_11226 [Danaus plexippus]	1e-175
6	GSSPFG00027599001	0	0	ND	-1.77078	unknown secreted protein [Papilio xuthus]	1e-63
7	GSSPFG00013202001	1	0	ND	-1.5585	PREDICTED: facilitated trehalose transporter Tret1-like isoform X2 [Bombyx mori]	5e-85
8	GSSPFG00007081001	1	0	ND	-1.35802	zinc/iron regulated transporter-related protein 3 [Papilio polytes]	3e-58
9	GSSPFG00020928001	0	0	ND	-1.33924	serpin-27 [Bombyx mori]	0.0
10	GSSPFG00006080001	0	0	ND	-1.3312	PREDICTED: neurogenic locus notch homolog protein 3-like [Bombyx mori]	0.0
11	GSSPFG00011000001	1	0	ND	-1.31696	heat shock protein 20, partial [Bicyclus anynana]	3e-100
12	GSSPFG00028350001	0	1	ND	-1.28624	unknown unsecreted protein [Papilio polytes]	3e-17
13	GSSPFG00030401001	0	1	ND	-1.28161	PREDICTED: luciferin 4-monooxygenase-like [Bombyx mori]	0.0
14	GSSPFG00028770001	0	1	ND	-1.06819	putative purple acid phosphatase [Danaus plexippus]	0.0
15	GSSPFG00033486001	0	0	ND	-0.920316	PREDICTED: clavesin-1-like [Bombyx mori]	5e-144
16	GSSPFG00016528001	0	1	ND	-0.910485	PREDICTED: CD63 antigen-like [Bombyx mori]	3e-168
17	GSSPFG00031627001	0	0	ND	-0.84914	PREDICTED: sushi, von Willebrand factor type A, EGF and pentraxin domain-containing protein 1 isoform X1 [Plutella xylostella]	7e-119
18	GSSPFG00030545001	0	0	ND	-0.692026	cysteine proteinase [Spodoptera litura]	4e-61
19	GSSPFG00021874001	1	0	ND	0.753626	globin [Danaus plexippus]	1e-41
20	GSSPFG00001429001	0	0	ND	0.760681	putative vacuolar ATP synthase subunit S1 [Danaus plexippus]	1e-50
21	GSSPFG00007368001	0	0	ND	0.839738	PREDICTED: spectrin beta chain isoform X12 [Plutella xylostella	0.0
22	GSSPFG00027440001	0	0	ND	0.86367	chlorophyllide A binding protein precursor [Bombyx mori]	0.0
23	GSSPFG00017344001	0	0	ND	0.874672	phosphoribosyl pyrophosphate synthetase [Bombyx mori	0.0
24	GSSPFG00024832001	0	0	ND	0.890817	heat shock protein 40 [Bombyx mori]	0.0
25	GSSPFG00011936001	0	0	ND	0.972241	NH
26	GSSPFG00027765001	0	0	ND	1.04626	monocarboxylate transporter [Anopheles darlingi]	0.0
27	GSSPFG00005408001	0	0	ND	1.13142	NH
28	GSSPFG00029006001	0	0	ND	1.14833	PREDICTED: carbonyl reductase [NADPH	5e-52
29	GSSPFG00034259001	0	0	ND	1.17781	NH
30	GSSPFG00017686001	1	0	ND	1.1876	PREDICTED: elongation of very long chain fatty acids protein 6-like [Bombyx mori]	2e-105
31	GSSPFG00001046001	0	0	ND	1.19689	alkaline phosphatase 2 [Spodoptera litura]	3e-90
32	GSSPFG00001046001	0	0	ND	1.19689	alkaline phosphatase 2 [Spodoptera litura]
33	GSSPFG00026992001	0	0	ND	1.20388	aminopeptidase N-7 [Bombyx mori]	0.0
34	GSSPFG00017025001	0	1	ND	1.21738	hexamerin 4 [Danaus plexippus]	1e-35
35	GSSPFG00012309001	0	0	ND	1.25801	PREDICTED: cysteine dioxygenase type 1-like [Bombyx mori]	6e-153
36	GSSPFG00034000001	0	1	ND	1.29025	PREDICTED: fasciclin-1-like [Bombyx mori]	0.0
37	GSSPFG00033052001	0	0	ND	1.39203	urate oxidase [Papilio polytes]	0.0
38	GSSPFG00000066001	0	0	ND	1.39405	vacuolar ATPase, subunit M9.7 [Manduca sexta]	2e-46
39	GSSPFG00017613001	0	1	ND	1.41912	NH
40	GSSPFG00017613001	0	1	ND	1.41912	NH
41	GSSPFG00008431001	0	0	ND	1.46226	PREDICTED: phosphoribosylformylglycinamidine synthase-like [Bombyx mori]	0.0
42	GSSPFG00003140001	0	0	ND	1.50471	ankyrin 2, isoform P [Drosophila melanogaster	0.0
43	GSSPFG00008474001	0	0	ND	1.60474	PREDICTED: muscle LIM protein Mlp84B-like isoformX1 [Apis mellifera	0.0
44	GSSPFG00027683001	1	0	ND	1.7182	urate oxidase [Papilio polytes]	6e-135
45	GSSPFG00024318001	0	0	1	2.09923	NH
46	GSSPFG00023864001	0	1	1	2.42463	RecName: Full=Facilitated trehalose transporter Tret1 [Drosophila pseudoobscura pseudoobscura]	0.0
	total	6	9	6
	%	13.0435	19.5652	100

## Sheet: miR-998
number	target by TargetScan	target by Miranda	target by RNA22	target by miRmap	log2FoldChange (target gene)	Annotation from SfruDB
1	GSSPFG00025432001	1	0	1	3.02044	PREDICTED: spermine oxidase-like [Bombyx mori]					3e-69
2	GSSPFG00018036001	0	1	1	2.61372	PREDICTED: sodium- and chloride-dependent glycine transporter 1-like [Bombyx mori]					0.0
3	GSSPFG00004454001	1	0	ND	1.88846	PREDICTED: maltase A1-like [Plutella xylostella]					0.0
4	GSSPFG00017613001	0	1	ND	1.41912	NH
5	GSSPFG00023681001	0	0	ND	1.31339	PREDICTED: facilitated trehalose transporter Tret1-like isoform X2 [Cerapachys biroi]					0.0
6	GSSPFG00030477001	0	0	ND	1.14673	PREDICTED: catalase [Musca domestica]					0.0
7	GSSPFG00018166001	0	0	ND	0.874451	REDICTED: alpha-tocopherol transfer protein-like [Plutella xylostella]					6e-78
8	GSSPFG00031518001	1	0	ND	0.870855	PREDICTED: branched-chain-amino-acid aminotransferase, cytosolic [Plutella xylostella]					0.0
9	GSSPFG00011364001	1	0	ND	0.850032	PREDICTED: LOW QUALITY PROTEIN: talin-1-like, partial [Plutella xylostella]					1e-141
10	GSSPFG00032415001	0	0	ND	0.837591	unknown protein, partial [Papilio polytes]					1e-35
11	GSSPFG00006843001	0	0	ND	-0.702894	PREDICTED: lipoyltransferase 1, mitochondrial-like isoform X1 [Bombyx mori					2e-152
12	GSSPFG00006300001	0	0	ND	-0.812305	fatty acyl-CoA reductase 17, partial [Helicoverpa armigera]					2e-67
13	GSSPFG00003067001	1	0	ND	-0.916381	REDICTED: three prime repair exonuclease 2-like isoform X1 [Bombyx mori					7e-47
14	GSSPFG00017800001	1	0	ND	-0.976348	MBF2 [Samia cynthia]					1e-56
15	GSSPFG00028010001	0	0	ND	-1.03407	plasma glutamate carboxypeptidase, partial [Spodoptera exigua]					0.0
16	GSSPFG00033001001	1	0	ND	-1.16855	ABCC3 [Spodoptera exigua]					0.0
17	GSSPFG00032940001	0	0	ND	-1.2269	NH
18	GSSPFG00001902001	1	0	ND	-1.46781	PREDICTED: zinc transporter 8-like [Bombyx mori]					0.0
19	GSSPFG00020707001	0	0	ND	-1.53882	PREDICTED: collagen alpha-1(III) chain, partial [Plutella xylostella]					0.0
20	GSSPFG00000240001	1	0	ND	-1.60229	takeout/JHBP like protein [Papilio xuthus]					3e-14
21	GSSPFG00000240001	1	0	ND	-1.60229	takeout/JHBP like protein [Papilio xuthus]					3e-14
22	GSSPFG00000240001	1	0	ND	-1.60229	takeout/JHBP like protein [Papilio xuthus]					3e-14
23	GSSPFG00032673001	0	1	ND	-1.75576	pancreatic triacylglycerol lipase [Danaus plexippus]					0.0
24	GSSPFG00020324001	1	0	ND	-1.86599	NH
25	GSSPFG00018939001	0	0	1	-2.03498	NH
26	GSSPFG00018939001	0	0	1	-2.03498	NH
27	GSSPFG00005411001	1	0	1	-3.20206	PREDICTED: stress response protein NST1-like [Plutella xylostella]					3e-110
28	GSSPFG00005411001	1	0	1	-3.20206	PREDICTED: stress response protein NST1-like [Plutella xylostella]					3e-110
29	GSSPFG00000212001	1	0	1	-3.27394	PREDICTED: flocculation protein FLO11-like [Bombyx mori]					0.0
30	GSSPFG00024155001	1	0	1	-3.56743	NH
31	GSSPFG00004437001	0	0	1	-5.02243	C-type lectin - galactose binding [Papilio polytes]					3e-91
	total	16	3	9
	%	51.6129	9.67742	100

## Sheet: miR-278
number	target by Targetscan	target by Miranda	target by RNA22	target by miRmap	log2FoldChange (target gene)	Annotation from SfruDB
1	GSSPFG00004305001	1	0	1	-4.04385	PREDICTED: formin-J-like [Plutella xylostella]	0.0
2	GSSPFG00028760001	1	0	ND	-1.62586	NH
3	GSSPFG00017581001	1	0	ND	-1.22265	unknown unsecreted protein [Papilio xuthus]	1e-33
4	GSSPFG00035050001	1	1	ND	-1.03886	PREDICTED: hepatic leukemia factor isoform X1 [Plutella xylostella]	1e-09
5	GSSPFG00005453001	1	0	ND	0.916248	PREDICTED: pancreatic lipase-related protein 2-like [Bombyx mori]	2e-138
6	GSSPFG00032095001	1	0	ND	0.934338	PREDICTED: spectrin beta chain, non-erythrocytic 5 isoform X2 [Bombus impatiens]	0.0
7	GSSPFG00005408001	1	0	ND	1.13142	NH
1	GSSPFG00025987001	1	0	ND	1.15773	PREDICTED: integrin alpha-PS2-like [Acyrthosiphon pisum]	0.0
		8	1	1
		100	14.2857	100

## Sheet: miR-263a-5p
number	target by TargetScan	target by Miranda	target by RNA22	target by miRmap	log2FoldChange (target gene)	Annotation from SfruDB
1	GSSPFG00025432001	0	0	1	3.02044	PREDICTED: spermine oxidase-like [Bombyx mori]	3e-69
2	GSSPFG00016418001	0	0	1	2.65566	PREDICTED: 4-hydroxyphenylpyruvate dioxygenase-like [Apis mellifera]	0.0
3	GSSPFG00018036001	1	1	1	2.61372	PREDICTED: sodium- and chloride-dependent glycine transporter 1-like [Bombyx mori]	0.0
4	GSSPFG00034472001	1	0	1	2.17916	PREDICTED: uncharacterized protein LOC101741030 [Bombyx mori]	3e-25
5	GSSPFG00004707001	1	0	1	2.02654	NH
6	GSSPFG00000595001	1	0	1	1.77416	PREDICTED: uncharacterized protein LOC101742741 [Bombyx mori]	1e-73
7	GSSPFG00020192001	0	0	1	1.74448	PREDICTED: 4-hydroxyphenylpyruvate dioxygenase-like [Apis mellifera]	0.0
8	GSSPFG00020192001	0	0	1	1.74448	PREDICTED: 4-hydroxyphenylpyruvate dioxygenase-like [Apis mellifera]
9	GSSPFG00020627001	0	0	1	1.57408	dj-1 protein [Papilio xuthus]	1e-110
10	GSSPFG00010982001	0	0	1	1.35648	putative amine oxidase [Danaus plexippus]	6e-126
11	GSSPFG00023681001	0	0	1	1.31339	PREDICTED: facilitated trehalose transporter Tret1-like isoform X2 [Cerapachys biroi]	0.0
12	GSSPFG00028295001	0	0	ND	1.30926	PREDICTED: uncharacterized protein LOC105384323 [Plutella xylostella]	8e-24
13	GSSPFG00001120001	1	0	ND	1.21249	zinc finger CCHC domain-containing protein 24 [Danaus plexippus]	1e-36
14	GSSPFG00000424001	0	0	ND	1.18117	PREDICTED: alpha-amylase 1, partial [Plutella xylostella]	0.0
15	GSSPFG00005645001	1	0	ND	1.08952	unknown [Spodoptera exigua]	1e-33
16	GSSPFG00019415001	1	0	ND	1.08059	unknown [Spodoptera exigua]	1e-33
17	GSSPFG00002775001	0	0	ND	1.0464	similar to CG14445 [Papilio xuthus]	0.0
18	GSSPFG00029913001	0	0	ND	1.0278	PREDICTED: beta-glucuronidase [Tribolium castaneum	0.0
19	GSSPFG00033152001	0	0	ND	0.969278	trehalase-like protein [Heliconius erato]	0.0
20	GSSPFG00007437001	1	0	ND	0.952141	PREDICTED: transcription factor kayak, isoforms D/sro-like isoform X3 [Bombyx mori]	0.0
21	GSSPFG00007437001	1	0	ND	0.952141	PREDICTED: transcription factor kayak, isoforms D/sro-like isoform X3 [Bombyx mori]	0.0
22	GSSPFG00027301001	1	0	ND	0.916767	PREDICTED: PI-PLC X domain-containing protein 1-like, partial [Plutella xylostella]	0.0
23	GSSPFG00032177001	1	0	ND	0.903118	PREDICTED: filamin-A isoform X3 [Megachile rotundata]	0.0
24	GSSPFG00032177001	1	0	ND	0.886534	PREDICTED: filamin-A isoform X3 [Megachile rotundata]	0.0
25	GSSPFG00032513001	1	0	ND	0.803197	trypsin-like protease [Danaus plexippus]	2e-45
26	GSSPFG00021500001	0	0	ND	0.75866	death-associated LIM-only protein [Helicoverpa armigera]	9e-128
27	GSSPFG00012238001	1	0	ND	-0.721915	PREDICTED: basement membrane-specific heparan sulfate proteoglycan core protein-like [Bombyx mori]	2e-83
28	GSSPFG00004194001	0	0	ND	-0.783993	PREDICTED: estradiol 17-beta-dehydrogenase 8-like isoform X1 [Bombyx mori]	4e-142
29	GSSPFG00006300001	0	0	ND	-0.812305	fatty acyl-CoA reductase 17, partial [Helicoverpa armigera]	2e-67
30	GSSPFG00014466001	1	0	ND	-0.815676	high mobility group protein A [Danaus plexippus]	6e-25
31	GSSPFG00031627001	0	0	ND	-0.84914	PREDICTED: sushi, von Willebrand factor type A, EGF and pentraxin domain-containing protein 1 isoform X2 [Plutella xylostella]	5e-115
32	GSSPFG00033118001	0	0	ND	-0.861093	NADH dehydrogenase [Papilio xuthus]	6e-44
33	GSSPFG00017800001	0	0	ND	-0.976348	MBF2 [Samia cynthia]	1e-56
34	GSSPFG00031635001	1	0	ND	-0.98711	PREDICTED: E3 ubiquitin-protein ligase ZNRF2-like [Bombyx mori]	2e-40
35	GSSPFG00028455001	1	0	ND	-1.05693	oligoribonuclease, mitochondrial [Danaus plexippus]	2e-97
36	GSSPFG00028455001	1	0	ND	-1.05693	oligoribonuclease, mitochondrial [Danaus plexippus]	2e-97
37	GSSPFG00002295001	1	0	ND	-1.06611	cysteine-rich/pacifastin venom protein 2 [Danaus plexippus]	1e-82
38	GSSPFG00031572001	0	0	ND	-1.08284	PREDICTED: mRNA-capping enzyme-like [Bombyx mori]	0.0
39	GSSPFG00032646001	0	0	ND	-1.09816	NH
40	GSSPFG00030680001	1	0	ND	-1.10422	similar to CG13607, partial [Papilio xuthus]	1e-133
41	GSSPFG00025992001	0	0	ND	-1.1705	PREDICTED: cartilage-associated protein-like [Plutella xylostella]	9e-146
42	GSSPFG00032655001	0	0	ND	-1.19807	NH
43	GSSPFG00010502001	0	0	ND	-1.21266	TPA: putative cuticle protein [Bombyx mori]	5e-55
44	GSSPFG00031524001	1	0	ND	-1.53517	laminin [Bombyx mori]	0.0
45	GSSPFG00031524001	1	0	ND	-1.53517	laminin [Bombyx mori]	0.0
46	GSSPFG00013202001	0	0	ND	-1.5585	PREDICTED: facilitated trehalose transporter Tret1-like isoform X2 [Bombyx mori]	5e-85
47	GSSPFG00007700001	1	0	ND	-1.56361	NH
48	GSSPFG00013845001	0	0	ND	-1.59857	TPA: putative cuticle protein [Bombyx mori]	9e-55
49	GSSPFG00006030001	0	0	ND	-1.95751	TPA: laccase-like multicopper oxidase 2 isoform B [Bombyx mori]	3e-179
50	GSSPFG00019063001	1	0	ND	-2.20879	NH
51	GSSPFG00022311001	0	0	ND	-2.29661	unknown secreted protein [Papilio polytes]	1e-25
52	GSSPFG00026857001	0	0	ND	-2.33193	peptidoglycan recognition protein C [Helicoverpa armigera]	7e-52
53	GSSPFG00033914001	1	0	1	-2.45959	NH
54	GSSPFG00000626001	0	0	1	-3.23683	cuticular protein hypothetical 1 precursor [Bombyx mori	9e-36
55	GSSPFG00027849001	0	0	1	-4.21038	PREDICTED: uncharacterized protein LOC101745588 [Bombyx mori]	2e-124
56	GSSPFG00026510001	1	0	1	-4.67668	PREDICTED: cadherin-89D [Plutella xylostella]	1e-46
	total	26	1
	%	46.4286	1.78571	100

## Sheet: miR-10-5p
number	target by TargetScan	target by Miranda	target by RNA22	target by miRmap	log2FoldChange (target gene)	Annotation from SfruDB
1	GSSPFG00018036001	1	1	1	2.61372	PREDICTED: sodium- and chloride-dependent glycine transporter 1-like [Bombyx mori]
2	GSSPFG00018036001	1	1	1	2.61372	PREDICTED: sodium- and chloride-dependent glycine transporter 1-like [Bombyx mori]
3	GSSPFG00034472001	0	0	1	2.17916	unknown secreted protein [Papilio xuthus]
4	GSSPFG00012081001	1	0	1	1.61385	PREDICTED: facilitated trehalose transporter Tret1-like [Plutella xylostella
5	GSSPFG00012081001	1	0	1	1.61385	PREDICTED: facilitated trehalose transporter Tret1-like [Plutella xylostella
6	GSSPFG00000135001	0	0	ND	1.4159	cytochrome P450 CYP341D1 [Helicoverpa armigera]
7	GSSPFG00008434001	1	0	ND	1.34769	NH
8	GSSPFG00034838001	1	1	ND	1.22728	PREDICTED: 26S proteasome complex subunit DSS1-like [Bombyx mori]
9	GSSPFG00001120001	1	0	ND	1.21249	zinc finger CCHC domain-containing protein 24 [Danaus plexippus]
10	GSSPFG00000134001	0	0	0	1.01338	cytochrome P450 CYP341B2 [Helicoverpa armigera]
11	GSSPFG00033152001	0	0	ND	0.969278	rehalase-like protein [Heliconius erato]
12	GSSPFG00011364001	0	0	ND	0.850032	PREDICTED: LOW QUALITY PROTEIN: talin-1-like, partial [Plutella xylostella
13	GSSPFG00006300001	1	0	ND	-0.812305	fatty acyl-CoA reductase 17, partial [Helicoverpa armigera]
14	GSSPFG00003844001	0	0	ND	-1.03543	PREDICTED: failed axon connections-like isoform X2 [Bombyx mori]
15	GSSPFG00035050001	0	0	ND	-1.03886	PREDICTED: hepatic leukemia factor isoform X1 [Plutella xylostella]
16	GSSPFG00012648001	1	0	ND	-1.41719	PREDICTED: protein KTI12 homolog [Bombyx mori]
17	GSSPFG00025387001	0	0	ND	-1.46129	diphosphomevalonate decarboxylase [Bombyx mori
18	GSSPFG00006030001	0	0	ND	-1.95751	TPA: laccase-like multicopper oxidase 2 isoform B [Bombyx mori]
19	GSSPFG00016766001	0	0	1	-2.73124	NH
20	GSSPFG00031779001	0	0	1	-3.74427	cuticular protein analogous to peritrophins 1-A [Tribolium castaneum
	total	9	3	8
	%	45	15	87.5
